# Supplementary material for: The evolution of CpG density and lifespan in conserved primate and mammalian promoters
Source: Aging (Albany NY). 2018 Apr 14;10(4):561–72. doi: 10.18632/aging.101413 (PMC5940106; doi:10.18632/aging.101413)
Supplement: Supplementary Table S3 [file aging-10-101413-s003.xlsx]

## Sheet: Mammals full list
epdid	speciescount	estimate	stderr	t.value	p.value	stars	pearsoncorrelation	geneid	geneidnameonly	adjust
FP008738	22	391.221	43.6368	8.9654	2.965e-08	***	0.899339	ORC3_1	ORC3	0.000504155
FP012506	20	302.894	32.3944	9.3502	4.107e-08	***	0.865057	ACBD5_2	ACBD5	0.000504155
FP015579	28	1449.31	192.948	7.5114	1.243e-07	***	0.842854	PAN2_3	PAN2	0.000508615
FP014005	25	220.551	27.8209	7.9275	9.526e-08	***	0.865759	DDB1_1	DDB1	0.000508615
FP018129	22	287.487	33.9629	8.4648	1.087e-07	***	0.893993	WDR93_1	WDR93	0.000508615
FP007328	15	10588.3	957.978	11.053	1.202e-07	***	0.954231	SEPT8_1	42986	0.000508615
FP005002	28	3452.45	489.571	7.052	2.162e-07	***	0.81576	IMPG2_1	IMPG2	0.000758275
FP008611	26	292.774	42.8446	6.8334	5.73e-07	***	0.81853	GCLC_1	GCLC	0.00175847
FP014573	24	398.648	56.2252	7.0902	7.14e-07	***	0.845806	AASDHPPT_1	AASDHPPT	0.00194771
FP018860	18	190.272	24.6591	7.7161	1.34e-06	***	0.893735	HERPUD1_1	HERPUD1	0.00328983
FP001958	24	202.391	30.5737	6.6198	2.469e-06	***	0.835199	MPC2_2	MPC2	0.0046798
FP015981	22	300.289	44.434	6.7581	2.478e-06	***	0.846935	ANAPC7_1	ANAPC7	0.0046798
FP021742	16	450.387	56.6093	7.9561	2.375e-06	***	0.874379	MVB12A_1	MVB12A	0.0046798
FP003030	22	194.707	29.7591	6.5428	2.891e-06	***	0.832224	UGP2_2	UGP2	0.0047318
FP009339	14	1993.11	242.836	8.2076	2.89e-06	***	0.921303	LRRC72_1	LRRC72	0.0047318
FP000941	21	331.154	50.3789	6.5733	3.56e-06	***	0.84019	FAM151A_1	FAM151A	0.00494157
FP024056	20	178.363	25.8792	6.8921	3.623e-06	***	0.864892	RNF185_1	RNF185	0.00494157
FP017717	19	3689.62	532.867	6.9241	3.424e-06	***	0.865897	GLDN_2	GLDN	0.00494157
FP015008	15	274.085	32.7431	8.3708	4.235e-06	***	0.929685	CLEC4C_1	CLEC4C	0.00547229
FP008178	27	96.2235	16.5875	5.801	5.569e-06	***	0.764005	MDC1_1	MDC1	0.00677608
FP016589	21	304.49	48.3746	6.2944	6.202e-06	***	0.829221	KDELC1_1	KDELC1	0.00677608
FP004992	19	212.698	32.2608	6.5931	6.185e-06	***	0.717329	TMEM45A_1	TMEM45A	0.00677608
FP009725	14	118.953	14.8244	8.0242	6.348e-06	***	0.924168	SEMA3C_2	SEMA3C	0.00677608
FP023641	26	1165.3	201.962	5.7699	7.061e-06	***	0.769034	DONSON_2	DONSON	0.00721098
FP002134	20	524.162	83.1498	6.3038	7.929e-06	***	0.836886	UCHL5_1	UCHL5	0.00721098
FP025429	20	241.945	38.4086	6.2992	8e-06	***	0.836703	G6PD_1	G6PD	0.00721098
FP010368	15	143.332	19.357	7.4046	8.224e-06	***	0.905778	DPP6_1	DPP6	0.00721098
FP018038	15	14194.5	1897.85	7.4793	7.438e-06	***	0.907398	C15orf37_1	C15orf37	0.00721098
FP004075	20	193.963	31.4319	6.1709	1.026e-05	***	0.883735	KCNE4_1	KCNE4	0.00787166
FP008963	18	5514.13	845.406	6.5225	9.647e-06	***	0.859839	TAAR6_1	TAAR6	0.00787166
FP022565	14	1803.03	234.05	7.7037	9.335e-06	***	0.891699	KLK14_1	KLK14	0.00787166
FP009597	13	4000.35	524.379	7.6287	1.023e-05	***	0.91708	VOPP1_3	VOPP1	0.00787166
FP013100	25	194.964	34.2649	5.6899	1.199e-05	***	0.778818	NOLC1_2	NOLC1	0.00865784
FP024606	16	1981.93	289.717	6.8409	1.187e-05	***	0.808128	PRRG1_1	PRRG1	0.00865784
FP025218	25	190.362	34.2092	5.5646	1.358e-05	***	0.764614	GPC4_1	GPC4	0.00952579
FP020256	21	564.737	94.1891	5.9958	1.446e-05	***	0.823977	EPN3_2	EPN3	0.00986132
FP008140	23	139.02	24.6171	5.6473	1.582e-05	***	0.783954	GABBR1_1	GABBR1	0.0100093
FP008971	20	491.896	80.5244	6.1087	1.51e-05	***	0.813609	RPS12_1	RPS12	0.0100093
FP008845	16	177.427	26.6834	6.6494	1.59e-05	***	0.897073	GTF3C6_1	GTF3C6	0.0100093
FP014453	22	550.745	94.7518	5.8125	1.658e-05	***	0.865259	PCF11_1	PCF11	0.0101764
FP017287	22	192.371	33.4834	5.7453	1.907e-05	***	0.804435	BTBD7_1	BTBD7	0.0109145
FP000949	18	-515.812	82.1217	-6.2811	2.019e-05	***	-0.859117	DHCR24_2	DHCR24	0.0109145
FP009935	16	1020.09	156.594	6.5142	1.96e-05	***	0.601695	CLDN15_2	CLDN15	0.0109145
FP020121	16	165.478	25.4424	6.504	1.991e-05	***	0.777392	HIGD1B_2	HIGD1B	0.0109145
FP022857	16	204.988	30.1498	6.799	1.906e-05	***	0.891015	ZCCHC3_1	ZCCHC3	0.0109145
FP013691	11	108.788	13.4642	8.0797	2.045e-05	***	0.849773	RP11-113D6.10_1	RP11-113D6.10	0.0109145
FP019694	20	5979.93	1029.58	5.8081	2.098e-05	***	0.815428	SLC13A2_1	SLC13A2	0.0109591
FP002260	22	251.338	44.2773	5.6765	2.201e-05	***	0.800995	CDK18_1	CDK18	0.0112577
FP008541	30	4653.63	907.259	5.1293	2.39e-05	***	0.605297	HSP90AB1_2	HSP90AB1	0.0115053
FP001788	22	273.699	49.3022	5.5515	2.355e-05	***	0.786522	CRABP2_1	CRABP2	0.0115053
FP011390	16	18271.7	2749.07	6.6465	2.372e-05	***	0.886784	HAUS6_3	HAUS6	0.0115053
FP001728	24	240.1	44.7176	5.3692	2.52e-05	***	0.76063	RUSC1_1	RUSC1	0.0116733
FP025091	6	15432.1	699.24	22.07	2.495e-05	***	0.995919	AMOT_4	AMOT	0.0116733
FP020326	20	238.64	41.9593	5.6874	2.672e-05	***	0.809629	RAD51C_1	RAD51C	0.0121482
FP006424	18	490.847	80.9101	6.0666	2.904e-05	***	0.791093	SYNPO2_2	SYNPO2	0.0129629
FP024093	65	278.853	64.3739	4.3318	6.064e-05	***	0.652554	LARGE_1	LARGE	0.0137059
FP005017	63	432.626	99.1601	4.3629	5.694e-05	***	0.642104	CBLB_1	CBLB	0.0137059
FP007797	37	99.9037	21.0121	4.7546	3.795e-05	***	0.71682	NSD1_2	NSD1	0.0137059
FP006531	34	482.278	100.168	4.8147	4.245e-05	***	0.574959	C4orf51_1	C4orf51	0.0137059
FP001228	32	154.427	32.6105	4.7355	6.2e-05	***	0.673586	SLC30A7_1	SLC30A7	0.0137059
FP018007	30	473.282	96.181	4.9207	5.082e-05	***	0.706867	TSPAN3_1	TSPAN3	0.0137059
FP003642	28	250.099	50.7577	4.9273	4.499e-05	***	0.701911	STK39_1	STK39	0.0137059
FP010081	27	12303.3	2407.1	5.1113	3.136e-05	***	0.72194	RNF133_1	RNF133	0.0137059
FP011997	25	295.135	56.9113	5.1859	3.869e-05	***	0.74935	RABGAP1_2	RABGAP1	0.0137059
FP017345	24	1200.14	227.442	5.2767	3.651e-05	***	0.762869	EML1_1	EML1	0.0137059
FP017886	24	180.694	34.6189	5.2195	3.576e-05	***	0.751471	FEM1B_1	FEM1B	0.0137059
FP002568	23	7689.78	1514.6	5.0771	5.758e-05	***	0.788457	HNRNPU_2	HNRNPU	0.0137059
FP012073	23	173.807	33.8884	5.1288	5.968e-05	***	0.552936	SLC25A25_1	SLC25A25	0.0137059
FP004101	22	208.142	40.406	5.1512	5.677e-05	***	0.763375	SPHKAP_1	SPHKAP	0.0137059
FP004234	22	266.081	49.6969	5.3541	3.627e-05	***	0.775496	KIF1A_2	KIF1A	0.0137059
FP006465	22	343.119	63.7921	5.3787	4.121e-05	***	0.785146	INTU_1	INTU	0.0137059
FP007006	22	560.646	106.322	5.2731	5.16e-05	***	0.779126	CCNB1_1	CCNB1	0.0137059
FP018916	22	-1431.84	276.837	-5.1721	6.406e-05	***	-0.773159	CDH5_1	CDH5	0.0137059
FP018945	22	220.799	42.3077	5.2189	5.795e-05	***	0.775948	B3GNT9_1	B3GNT9	0.0137059
FP002659	21	377.044	72.0582	5.2325	5.629e-05	***	0.77675	HPCAL1_5	HPCAL1	0.0137059
FP008502	21	228.185	43.1516	5.288	6.026e-05	***	0.788613	MRPL2_1	MRPL2	0.0137059
FP008999	21	216.516	40.872	5.2974	4.109e-05	***	0.772193	MAP7_1	MAP7	0.0137059
FP016331	21	1042.47	199.401	5.228	5.683e-05	***	0.776487	CG005_1	CG005	0.0137059
FP020740	21	197.389	36.922	5.3461	5.347e-05	***	0.791856	METRNL_2	METRNL	0.0137059
FP005244	20	220.143	41.0329	5.365	6.317e-05	***	0.801702	PLXND1_2	PLXND1	0.0137059
FP005439	20	17187.4	3266.5	5.2617	6.361e-05	***	0.834248	KCNAB1_4	KCNAB1	0.0137059
FP006148	20	230.75	41.5352	5.5555	3.487e-05	***	0.803011	PF4V1_1	PF4V1	0.0137059
FP009717	20	78.5151	14.3053	5.4885	4.956e-05	***	0.808152	GNAI1_2	GNAI1	0.0137059
FP017072	20	95.2605	17.908	5.3194	5.648e-05	***	0.790376	ARG2_1	ARG2	0.0137059
FP017286	20	2461.99	459.597	5.3569	6.42e-05	***	0.801265	BTBD7_2	BTBD7	0.0137059
FP004613	19	6083.68	1074.03	5.6643	3.52e-05	***	0.816857	RTP3_1	RTP3	0.0137059
FP008617	19	260.722	47.5457	5.4836	5.004e-05	***	0.8079	FAM83B_1	FAM83B	0.0137059
FP011325	19	176.445	31.8556	5.5389	5.677e-05	***	0.819528	SPATA6L_1	SPATA6L	0.0137059
FP012617	19	-2668.3	484.116	-5.5117	4.736e-05	***	-0.809329	RBP3_1	RBP3	0.0137059
FP024852	19	340.367	63.1044	5.3937	5.97e-05	***	0.803226	RAB41_1	RAB41	0.0137059
FP002079	18	476.786	81.233	5.8694	4.079e-05	***	0.740872	MR1_1	MR1	0.0137059
FP014069	18	212.392	37.3975	5.6793	4.372e-05	***	0.826179	TAF6L_1	TAF6L	0.0137059
FP014590	18	793.145	134.133	5.9131	3.781e-05	***	0.736748	EXPH5_2	EXPH5	0.0137059
FP016987	18	1425.88	252.285	5.6519	4.6e-05	***	0.824905	PSMA3_1	PSMA3	0.0137059
FP018380	18	1251.76	228.071	5.4885	6.239e-05	***	0.817054	ZSCAN10_1	ZSCAN10	0.0137059
FP020214	18	4513.92	811.351	5.5635	5.422e-05	***	0.820716	SNF8_1	SNF8	0.0137059
FP002131	17	1004.3	176.135	5.7019	5.468e-05	***	0.873068	RGS2_1	RGS2	0.0137059
FP010528	17	456.002	81.2119	5.615	6.375e-05	***	0.686757	CSGALNACT1_2	CSGALNACT1	0.0137059
FP011354	17	228.722	39.0089	5.8633	4.122e-05	***	0.842981	KDM4C_2	KDM4C	0.0137059
FP014378	17	4485.11	779.26	5.7556	4.975e-05	***	0.83841	UCP3_1	UCP3	0.0137059
FP018325	17	121.982	21.0739	5.7883	4.698e-05	***	0.839817	NTHL1_1	NTHL1	0.0137059
FP019932	17	751.47	136.87	5.4904	6.216e-05	***	0.817151	GJD3_1	GJD3	0.0137059
FP021002	17	196.764	33.2243	5.9223	3.722e-05	***	0.845408	MAPK4_2	MAPK4	0.0137059
FP023130	17	474.583	82.8073	5.7312	5.193e-05	***	0.722312	BPIFA3_1	BPIFA3	0.0137059
FP024299	17	449.239	78.2584	5.7405	5.109e-05	***	0.703551	PARVB_4	PARVB	0.0137059
FP005007	16	391.638	65.0641	6.0193	4.309e-05	***	0.790277	RPL24_1	RPL24	0.0137059
FP017459	16	365.115	63.0688	5.7892	6.287e-05	***	0.89932	SNURF_1	SNURF	0.0137059
FP010120	15	571.571	94.364	6.0571	5.697e-05	***	0.810398	CCDC136_2	CCDC136	0.0137059
FP022660	15	301.827	50.4116	5.9872	6.34e-05	***	0.907287	TFPT_1	TFPT	0.0137059
FP004333	12	1563.52	222.133	7.0386	3.547e-05	***	0.849175	HRH1_2	HRH1	0.0137059
FP007980	12	122.479	17.4927	7.0017	6.313e-05	***	0.91918	MCUR1_1	MCUR1	0.0137059
FP018678	12	87.4586	13.3082	6.5718	6.298e-05	***	0.901105	DOC2A_3	DOC2A	0.0137059
FP018195	11	121.778	15.262	7.9791	4.45e-05	***	0.942535	LRRK1_1	LRRK1	0.0137059
FP002705	10	10457.9	1146.02	9.1255	3.898e-05	***	0.954915	WDR35_2	WDR35	0.0137059
FP023837	6	2839.11	146.281	19.409	4.155e-05	***	0.994733	SLC25A18_1	SLC25A18	0.0137059
FP019286	22	408.391	79.3107	5.1493	6.729e-05	***	0.570417	MYO1C_1	MYO1C	0.0138775
FP022007	21	472.463	91.7376	5.1502	6.716e-05	***	0.771833	ZNF260_1	ZNF260	0.0138775
FP022771	20	255.438	48.7534	5.2394	6.661e-05	***	0.818361	ZNF583_2	ZNF583	0.0138775
FP022277	17	342.41	61.3632	5.5801	6.783e-05	***	0.830562	ZNF112_1	ZNF112	0.0138775
FP011936	16	249.585	44.6724	5.587	6.699e-05	***	0.830882	ATP6V1G1_1	ATP6V1G1	0.0138775
FP004052	23	340.991	68.3472	4.9891	7.047e-05	***	0.744633	PTPRN_1	PTPRN	0.0138919
FP011423	22	1688.85	329.38	5.1273	7.053e-05	***	0.770445	CDKN2B_1	CDKN2B	0.0138919
FP008562	19	148.119	27.9059	5.3078	7.073e-05	***	0.798616	TDRD6_1	TDRD6	0.0138919
FP017708	17	113.06	20.3133	5.5658	6.956e-05	***	0.829904	USP8_1	USP8	0.0138919
FP013639	15	479.661	80.9342	5.9266	6.961e-05	***	0.781961	MICAL2_1	MICAL2	0.0138919
FP016065	20	12158.1	2295.95	5.2955	7.248e-05	***	0.797941	CCDC64_2	CCDC64	0.0141227
FP013454	21	326.806	62.9824	5.1888	7.395e-05	***	0.782924	TNNI2_1	TNNI2	0.0142956
FP016693	48	1378.94	314.03	4.3911	7.476e-05	***	0.485921	SLC39A2_1	SLC39A2	0.0143393
FP016733	14	342.156	58.2817	5.8707	7.59e-05	***	0.861246	FLJ20424_1	FLJ20424	0.0144451
FP007855	20	5907.97	1126.3	5.2454	8.005e-05	***	0.795178	SQSTM1_4	SQSTM1	0.0151178
FP022757	16	1210.73	221.277	5.4716	8.232e-05	***	0.825451	NLRP4_1	NLRP4	0.0154278
FP013693	20	4489.65	874.831	5.132	8.321e-05	***	0.779572	SAA2_1	SAA2	0.0154764
FP023014	15	3969.29	707.124	5.6133	8.434e-05	***	0.841383	DSTN_2	DSTN	0.0155687
FP006442	18	316.868	59.5874	5.3177	8.611e-05	***	0.808334	EXOSC9_1	EXOSC9	0.0157768
FP005776	20	16361.1	3201.72	5.1101	8.709e-05	***	0.77826	WHSC1_4	WHSC1	0.0158381
FP015030	21	97.7063	19.1525	5.1015	8.866e-05	***	0.777743	M6PR_1	M6PR	0.0160051
FP004959	19	18609.8	3586.14	5.1894	8.951e-05	***	0.79202	PROS1_2	PROS1	0.0160406
FP002812	21	277.827	55.5511	5.0013	9.259e-05	***	0.762575	CCDC121_1	CCDC121	0.016237
FP006081	21	9795.58	1926.48	5.0847	9.182e-05	***	0.776728	TECRL_1	TECRL	0.016237
FP003366	17	498.062	92.1196	5.4067	9.249e-05	***	0.822295	SULT1C4_1	SULT1C4	0.016237
FP014135	27	151.649	31.5735	4.8031	9.555e-05	***	0.880445	CDC42BPG_1	CDC42BPG	0.0162409
FP019891	24	346.879	72.146	4.808	9.443e-05	***	0.723874	PGAP3_1	PGAP3	0.0162409
FP011994	23	306.468	62.3161	4.9179	9.551e-05	***	0.76587	ZBTB26_2	ZBTB26	0.0162409
FP002840	20	3666.99	724.165	5.0637	9.592e-05	***	0.775453	CAPN13_2	CAPN13	0.0162409
FP004526	18	20304.1	3769.25	5.3868	9.587e-05	***	0.82131	CCR8_1	CCR8	0.0162409
FP010203	19	1178.5	228.889	5.1488	9.706e-05	***	0.789696	TMEM213_1	TMEM213	0.0163214
FP009547	21	489.72	98.4491	4.9743	9.814e-05	***	0.703498	OGDH_3	OGDH	0.0163907
FP016956	17	188.606	34.193	5.5159	9.943e-05	***	0.837038	CDKN3_1	CDKN3	0.016494
FP017388	17	366.28	68.3162	5.3615	0.0001003	***	0.820052	TNFAIP2_1	TNFAIP2	0.0165266
FP022176	36	163.027	36.5076	4.4656	0.0001048	***	0.633662	TMEM91_2	TMEM91	0.0167234
FP010964	21	432	87.2255	4.9527	0.0001029	***	0.759448	RBM12B_1	RBM12B	0.0167234
FP000977	19	139.082	27.1855	5.1161	0.0001036	***	0.787794	C1orf87_1	C1orf87	0.0167234
FP019258	17	140.204	26.2703	5.337	0.0001049	***	0.818816	GAS8_2	GAS8	0.0167234
FP012097	14	450.375	76.4362	5.8922	0.0001043	***	0.871432	ODF2_1	ODF2	0.0167234
FP011123	18	4066.74	797.777	5.0976	0.0001075	***	0.786712	FBXO32_2	FBXO32	0.0170273
FP000189	16	440.182	80.6869	5.4554	0.0001102	***	0.787952	C1orf127_1	C1orf127	0.0173431
FP010839	22	806.693	166.422	4.8473	0.0001119	***	0.743572	COPS5_1	COPS5	0.0174654
FP004123	21	284.631	57.0656	4.9878	0.0001124	***	0.770753	ITM2C_2	ITM2C	0.0174654
FP003786	22	301.434	62.3303	4.8361	0.0001148	***	0.742804	TFPI_1	TFPI	0.0176153
FP009918	19	169.694	33.4921	5.0667	0.0001144	***	0.784884	SRRT_1	SRRT	0.0176153
FP000425	21	2772.69	566.487	4.8945	0.0001167	***	0.746418	SYF2_1	SYF2	0.0177464
FP007902	19	354.932	70.2105	5.0552	0.0001171	***	0.733102	SERPINB9_2	SERPINB9	0.0177464
FP000731	21	478.736	98.0797	4.8811	0.0001202	***	0.634963	SLFNL1_2	SLFNL1	0.0180839
FP002623	18	415.341	80.8011	5.1403	0.0001208	***	0.798673	ADI1_1	ADI1	0.0180839
FP004347	32	1581.82	354.298	4.4646	0.0001381	***	0.845908	PPARG_4	PPARG	0.0181807
FP004184	25	408.792	88.0859	4.6408	0.0001261	***	0.70334	ASB18_1	ASB18	0.0181807
FP017332	23	228.564	47.771	4.7846	0.0001289	***	0.739226	PAPOLA_1	PAPOLA	0.0181807
FP007100	22	230.047	47.2351	4.8703	0.000123	***	0.75402	MTX3_1	MTX3	0.0181807
FP000183	21	971.829	200.754	4.8409	0.0001312	***	0.752049	DFFA_2	DFFA	0.0181807
FP006583	21	436.63	89.4309	4.8823	0.0001403	***	0.679887	GUCY1A3_1	GUCY1A3	0.0181807
FP019012	21	153.209	31.3212	4.8915	0.0001376	***	0.76461	ESRP2_1	ESRP2	0.0181807
FP024736	21	4105.9	845.429	4.8566	0.0001268	***	0.753105	PAGE4_1	PAGE4	0.0181807
FP008440	20	264.812	53.3437	4.9643	0.0001407	***	0.778676	DAAM2_2	DAAM2	0.0181807
FP011533	20	362.321	73.428	4.9344	0.0001257	***	0.767369	CCIN_1	CCIN	0.0181807
FP008166	19	123.235	24.5344	5.023	0.000125	***	0.782262	ABCF1_1	ABCF1	0.0181807
FP012558	19	4547.65	914.908	4.9706	0.0001389	***	0.779068	CREM_4	CREM	0.0181807
FP013075	19	137.656	27.6066	4.9864	0.0001345	***	0.832038	LZTS2_3	LZTS2	0.0181807
FP022308	19	112.615	22.629	4.9766	0.0001372	***	0.779435	ERCC2_1	ERCC2	0.0181807
FP009009	18	203.162	40.0188	5.0767	0.0001366	***	0.795051	IFNGR1_1	IFNGR1	0.0181807
FP012569	18	180.888	34.8092	5.1966	0.0001354	***	0.811525	ZNF248_1	ZNF248	0.0181807
FP001745	17	747.583	143.803	5.1987	0.0001349	***	0.811637	RIT1_1	RIT1	0.0181807
FP002321	17	2970.75	566.905	5.2403	0.000125	***	0.813838	HHAT_4	HHAT	0.0181807
FP011127	17	106.525	20.5029	5.1956	0.0001357	***	0.811474	FAM91A1_1	FAM91A1	0.0181807
FP013485	17	467.812	89.4741	5.2285	0.0001278	***	0.813215	SLC22A18_1	SLC22A18	0.0181807
FP017660	17	275.94	53.2914	5.1779	0.0001401	***	0.810529	TRIM69_1	TRIM69	0.0181807
FP001943	16	283.42	51.5632	5.4966	0.000137	***	0.846004	POGK_1	POGK	0.0181807
FP005631	15	4698.28	849.584	5.5301	0.0001298	***	0.737305	RFC4_1	RFC4	0.0181807
FP014066	15	257.706	48.2953	5.3361	0.0001352	***	0.828581	TTC9C_2	TTC9C	0.0181807
FP014513	14	1563.48	273.25	5.7218	0.0001338	***	0.865164	PANX1_1	PANX1	0.0181807
FP022788	14	2468.73	443.976	5.5605	0.0001237	***	0.709794	ZNF304_1	ZNF304	0.0181807
FP001540	24	2556.63	551.795	4.6333	0.0001431	***	0.710988	FAM63A_3	FAM63A	0.018394
FP012585	19	203.359	41.073	4.9512	0.0001444	***	0.777866	HNRNPF_3	HNRNPF	0.0184644
FP019824	16	3783.17	692.937	5.4596	0.0001454	***	0.844375	CCL3L3_1	CCL3L3	0.0184959
FP008570	49	427.115	103.408	4.1304	0.0001638	***	0.663	GPR116_1	GPR116	0.018532
FP019547	26	84.837	18.8123	4.5096	0.000158	***	0.685037	ADPRM_1	ADPRM	0.018532
FP024954	23	344.92	74.583	4.6246	0.0001637	***	0.851809	FAM133A_1	FAM133A	0.018532
FP003587	22	1163.35	244.285	4.7623	0.0001557	***	0.743246	ACVR1_3	ACVR1	0.018532
FP005204	22	2771.97	583.529	4.7504	0.0001598	***	0.74584	ABTB1_2	ABTB1	0.018532
FP002729	21	854.846	177.229	4.8234	0.0001588	***	0.760132	TP53I3_1	TP53I3	0.018532
FP012338	21	116.695	24.2575	4.8107	0.0001631	***	0.759283	GTPBP4_1	GTPBP4	0.018532
FP024853	21	-5108.46	1077.21	-4.7423	0.0001627	***	-0.74528	PDZD11_1	PDZD11	0.018532
FP000143	20	5659.02	1172.99	4.8245	0.0001585	***	0.838942	CAMTA1_2	CAMTA1	0.018532
FP001829	20	345.505	71.6336	4.8232	0.0001589	***	0.760119	PYHIN1_1	PYHIN1	0.018532
FP002963	20	1699.85	351.067	4.8419	0.0001527	***	0.761361	GTF2A1L_1	GTF2A1L	0.018532
FP004758	20	340.505	70.5643	4.8255	0.0001581	***	0.760268	RAD54L2_2	RAD54L2	0.018532
FP013652	20	118.141	24.3566	4.8505	0.00015	***	0.761923	BTBD10_1	BTBD10	0.018532
FP014617	20	619.743	126.506	4.8989	0.0001606	***	0.774593	ALG9_1	ALG9	0.018532
FP012915	19	146.238	29.8963	4.8915	0.000163	***	0.701386	RNLS_1	RNLS	0.018532
FP022238	18	917.343	183.055	5.0113	0.0001549	***	0.791237	XRCC1_1	XRCC1	0.018532
FP024068	18	426.16	84.6684	5.0333	0.0001485	***	0.792531	PRR14L_2	PRR14L	0.018532
FP017563	17	262.3	51.4652	5.0967	0.0001627	***	0.806096	RAD51_1	RAD51	0.018532
FP024719	16	2429.85	463.689	5.2403	0.0001595	***	0.823831	CACNA1F_1	CACNA1F	0.018532
FP018128	15	1939.34	359.752	5.3908	0.0001625	***	0.797789	PEX11A_1	PEX11A	0.018532
FP002220	14	353.465	64.9625	5.4411	0.0001498	***	0.843548	CHIT1_1	CHIT1	0.018532
FP021342	14	968.629	164.746	5.8795	0.0001553	***	0.880698	ARRDC5_1	ARRDC5	0.018532
FP021813	14	394.483	70.4246	5.6015	0.00016	***	0.860479	SUGP2_1	SUGP2	0.018532
FP022643	14	188.152	33.3014	5.65	0.0001488	***	0.862393	ZNF331_5	ZNF331	0.018532
FP004125	18	318.992	64.0985	4.9766	0.0001657	***	0.789176	SPATA3_1	SPATA3	0.018661
FP009991	21	952.786	198.522	4.7994	0.0001671	***	0.758528	PIK3CG_2	PIK3CG	0.0186922
FP017934	13	206.025	33.4671	6.1561	0.0001675	***	0.898938	CD276_1	CD276	0.0186922
FP001720	18	4396.19	866.231	5.0751	0.0001693	***	0.804895	FAM189B_2	FAM189B	0.018734
FP011038	18	116.138	23.3903	4.9652	0.0001694	***	0.788493	ATP6V1C1_1	ATP6V1C1	0.018734
FP020336	22	315.595	67.716	4.6606	0.0001704	***	0.730348	PTRH2_1	PTRH2	0.01876
FP011923	21	1482.89	314.638	4.713	0.0001734	***	0.74322	AMBP_1	AMBP	0.0190051
FP012854	26	144.116	31.8147	4.5299	0.0001831	***	0.729344	ZMIZ1_2	ZMIZ1	0.0190773
FP020122	25	153.635	34.2765	4.4822	0.0001858	***	0.690881	EFTUD2_2	EFTUD2	0.0190773
FP008451	23	2638.32	576.631	4.5754	0.0001835	***	0.715132	TREML1_1	TREML1	0.0190773
FP014402	22	293.572	62.7743	4.6766	0.0001878	***	0.740637	SERPINH1_1	SERPINH1	0.0190773
FP017795	22	354.34	76.2297	4.6483	0.0001752	***	0.729451	RORA_2	RORA	0.0190773
FP020123	22	122.394	26.1493	4.6806	0.0001862	***	0.740918	EFTUD2_1	EFTUD2	0.0190773
FP005887	21	11413.3	2395.15	4.7652	0.0001796	***	0.756218	FBXL5_2	FBXL5	0.0190773
FP007541	21	236.761	49.8	4.7543	0.0001838	***	0.755473	KCTD16_1	KCTD16	0.0190773
FP007966	21	374.908	80.0646	4.6826	0.0001854	***	0.741061	ERVFRD-1_1	ERVFRD-1	0.0190773
FP010514	21	482.062	103.107	4.6753	0.0001884	***	0.698402	PCM1_5	PCM1	0.0190773
FP010352	19	169.767	35.0832	4.839	0.0001813	***	0.770761	WDR86_1	WDR86	0.0190773
FP017167	19	193.077	40.0446	4.8215	0.0001879	***	0.769629	MLH3_1	MLH3	0.0190773
FP009030	18	102.707	20.8038	4.9369	0.000179	***	0.786786	GPR126_1	GPR126	0.0190773
FP014815	18	525.847	106.78	4.9246	0.0001833	***	0.786034	ST3GAL4_3	ST3GAL4	0.0190773
FP006951	17	28728.8	5719.28	5.0231	0.0001863	***	0.780048	ACTBL2_1	ACTBL2	0.0190773
FP012827	17	141.421	28.2056	5.0139	0.0001896	***	0.80144	CAMK2G_1	CAMK2G	0.0190773
FP017375	15	85.5863	16.1457	5.3009	0.0001881	***	0.837104	ZNF839_1	ZNF839	0.0190773
FP003427	14	124.947	22.6652	5.5127	0.0001827	***	0.856877	C1QL2_1	C1QL2	0.0190773
FP023188	13	15813.6	2758.37	5.733	0.0001895	***	0.685682	CNBD2_1	CNBD2	0.0190773
FP019773	9	476.419	66.2161	7.1949	0.0001782	***	0.854437	SPACA3_1	SPACA3	0.0190773
FP024698	21	577.156	121.896	4.7348	0.0001915	***	0.754144	PQBP1_1	PQBP1	0.0191318
FP025394	16	-265.97	51.7989	-5.1347	0.0001917	***	-0.264685	ARHGAP4_1	ARHGAP4	0.0191318
FP024048	17	240.8	48.1063	5.0056	0.0001925	***	0.800961	SMTN_3	SMTN	0.0191339
FP015394	28	-6147.74	1401.02	-4.3881	0.0001969	***	-0.292463	CELA1_1	CELA1	0.0193756
FP015108	19	641.163	133.643	4.7976	0.0001973	***	0.768062	HIST4H4_1	HIST4H4	0.0193756
FP015215	17	6359.35	1273.47	4.9937	0.0001968	***	0.80028	IPO8_2	IPO8	0.0193756
FP001084	21	20939.7	4438.81	4.7174	0.0001987	***	0.752943	USP33_2	USP33	0.0193972
FP022377	6	491.726	37.684	13.049	0.0001991	***	0.988457	TMEM160_1	TMEM160	0.0193972
FP022127	23	381.666	83.1506	4.5901	0.0001999	***	0.777848	AKT2_2	AKT2	0.0193982
FP001060	20	150.177	31.3977	4.7831	0.0002032	***	0.767107	FPGT_1	FPGT	0.0195638
FP001398	16	2084.57	408.577	5.102	0.000203	***	0.816657	TRIM45_1	TRIM45	0.0195638
FP020303	21	489.55	105.702	4.6314	0.0002074	***	0.669511	CUEDC1_2	CUEDC1	0.0196314
FP018782	20	230.531	49.0892	4.6962	0.0002079	***	0.751468	DNAJA2_1	DNAJA2	0.0196314
FP003186	17	116.95	22.9542	5.0949	0.0002056	***	0.816278	TCF7L1_1	TCF7L1	0.0196314
FP008740	16	4633.79	910.361	5.0901	0.0002073	***	0.816018	SPACA1_1	SPACA1	0.0196314
FP018545	12	246.889	41.28	5.9809	0.0002073	***	0.893855	GPRC5B_1	GPRC5B	0.0196314
FP005106	17	353.453	71.436	4.9478	0.0002143	***	0.797612	CD80_1	CD80	0.0201582
FP023807	11	100.791	16.9663	5.9407	0.0002178	***	0.855356	SLC19A1_2	SLC19A1	0.0204092
FP013981	20	28656.9	6140.48	4.6669	0.0002212	***	0.749419	MS4A2_1	MS4A2	0.020649
FP006629	22	386.057	85.0632	4.5385	0.0002247	***	0.721232	DDX60L_3	DDX60L	0.0207442
FP000727	19	407.999	86.2231	4.7319	0.0002256	***	0.485338	CTPS1_1	CTPS1	0.0207442
FP000974	19	209.047	44.1726	4.7325	0.0002253	***	0.763739	HOOK1_2	HOOK1	0.0207442
FP019325	17	228.052	46.293	4.9263	0.0002231	***	0.796345	SPATA22_2	SPATA22	0.0207442
FP014507	19	-521.384	110.305	-4.7267	0.000228	***	-0.454166	MGC5306_1	MGC5306	0.0208867
FP000719	22	596.974	132.258	4.5137	0.0002377	***	0.719335	ZNF684_1	ZNF684	0.0214574
FP011326	21	533.035	116.693	4.5679	0.0002385	***	0.601635	CDC37L1_1	CDC37L1	0.0214574
FP001825	20	13529.6	2921.27	4.6314	0.0002386	***	0.746906	OR10X1_1	OR10X1	0.0214574
FP021635	18	3285.01	685.77	4.7903	0.0002384	***	0.777629	C19orf53_1	C19orf53	0.0214574
FP012302	9	400.472	51.4544	7.783	0.0002369	***	0.942716	C9orf169_1	C9orf169	0.0214574
FP003554	21	397.282	85.8493	4.6277	0.0002405	***	0.746638	NMI_1	NMI	0.0215493
FP020004	19	191.679	40.8208	4.6956	0.000243	***	0.761242	ACLY_1	ACLY	0.0216156
FP015459	16	3846.88	769.361	5.0001	0.0002429	***	0.811113	ITGB7_2	ITGB7	0.0216156
FP018572	21	1750.17	384.649	4.55	0.0002481	***	0.731382	IGSF6_1	IGSF6	0.0217539
FP006986	17	269.836	55.3629	4.8739	0.000246	***	0.793216	CTC-534A2.2_1	CTC-534A2.2	0.0217539
FP020806	17	343.165	70.4378	4.8719	0.0002469	***	0.793092	TXNDC2_1	TXNDC2	0.0217539
FP016205	15	397.877	74.8828	5.3133	0.0002473	***	0.747506	GALNT9_3	GALNT9	0.0217539
FP006985	17	254.825	52.3569	4.8671	0.0002492	***	0.792801	TRIM23_1	TRIM23	0.0217726
FP013747	83	230.883	60.0031	3.8478	0.0002529	***	0.585029	BDNF_4	BDNF	0.0218625
FP014658	21	521.646	114.834	4.5426	0.0002522	***	0.476511	ZNF259_1	ZNF259	0.0218625
FP017012	21	260.297	57.3169	4.5414	0.0002529	***	0.730731	C14orf39_1	C14orf39	0.0218625
FP001249	20	407.557	88.5703	4.6015	0.0002542	***	0.744761	NBPF6_1	NBPF6	0.0218828
FP002917	20	464.51	101.046	4.597	0.0002567	***	0.744437	DYNC2LI1_1	DYNC2LI1	0.0218828
FP021320	20	423.129	92.0236	4.5981	0.0002561	***	0.748379	FLJ10374_1	FLJ10374	0.0218828
FP016461	17	-222.073	45.7628	-4.8527	0.000256	***	-0.791929	RNASEH2B_1	RNASEH2B	0.0218828
FP023613	21	415.239	91.7756	4.5245	0.0002624	***	0.605204	MRAP_1	MRAP	0.0222144
FP007623	20	1580.16	344.513	4.5866	0.0002624	***	0.743687	ANXA6_2	ANXA6	0.0222144
FP014161	23	348.378	78.0013	4.4663	0.0002647	***	0.79141	CAPN1_4	CAPN1	0.0222556
FP013259	21	124.396	27.1387	4.5837	0.0002641	***	0.743476	SEC23IP_1	SEC23IP	0.0222556
FP014817	24	271.728	61.5753	4.4129	0.000268	***	0.445908	ST3GAL4_4	ST3GAL4	0.0223019
FP015382	24	155.734	35.6504	4.3684	0.0002693	***	0.689987	LETMD1_1	LETMD1	0.0223019
FP015264	19	-201.723	43.3993	-4.6481	0.0002679	***	-0.757971	PUS7L_1	PUS7L	0.0223019
FP018754	17	8581.72	1776.86	4.8297	0.0002672	***	0.790524	C16orf98_1	C16orf98	0.0223019
FP023377	17	1782.22	369.49	4.8235	0.0002704	***	0.790139	UBE2V1_2	UBE2V1	0.0223019
FP017107	12	150.049	27.4009	5.4761	0.0002707	***	0.86598	PCNX_1	PCNX	0.0223019
FP020516	19	371.165	80.0546	4.6364	0.0002744	***	0.75716	SLC16A5_3	SLC16A5	0.0223073
FP004037	17	127.237	26.3985	4.8199	0.0002722	***	0.789918	CNPPD1_2	CNPPD1	0.0223073
FP010139	17	378.604	78.601	4.8168	0.0002738	***	0.789729	ZC3HC1_1	ZC3HC1	0.0223073
FP025170	15	167.67	33.0549	5.0725	0.0002741	***	0.825802	DCAF12L1_1	DCAF12L1	0.0223073
FP011504	68	137.228	35.6207	3.8525	0.0002764	***	0.6377	STOML2_1	STOML2	0.0223957
FP002783	21	-10212	2240.45	-4.558	0.000279	***	-0.357515	C2orf53_1	C2orf53	0.0224432
FP006016	21	346.993	77.2441	4.4922	0.0002818	***	0.72701	CNGA1_2	CNGA1	0.0224432
FP002685	20	208.948	45.9063	4.5516	0.0002828	***	0.741134	DDX1_2	DDX1	0.0224432
FP024073	20	11636.7	2519.17	4.6192	0.0002843	***	0.755961	DEPDC5_4	DEPDC5	0.0224432
FP010013	17	196.721	40.9538	4.8035	0.0002807	***	0.788906	PNPLA8_2	PNPLA8	0.0224432
FP011888	17	166.602	34.7257	4.7977	0.0002838	***	0.788544	HSDL2_1	HSDL2	0.0224432
FP004843	14	-225.064	42.9896	-5.2353	0.0002788	***	-0.844752	ARHGEF3_3	ARHGEF3	0.0224432
FP003310	10	129.14	19.3356	6.6789	0.0002829	***	0.920423	REV1_1	REV1	0.0224432
FP010238	29	-4851.21	1158.14	-4.1888	0.0002853	***	-0.742896	TAS2R4_1	TAS2R4	0.02245
FP001887	22	131.495	29.6924	4.4286	0.0002884	***	0.712691	B4GALT3_2	B4GALT3	0.0225012
FP006509	21	206.068	45.9724	4.4824	0.000288	***	0.763064	IL15_1	IL15	0.0225012
FP000304	15	3188.7	650.408	4.9026	0.0002887	***	0.805598	ALDH4A1_2	ALDH4A1	0.0225012
FP007055	20	283.893	62.5654	4.5375	0.0002914	***	0.740097	HEXB_1	HEXB	0.0225683
FP007770	15	120.789	24.6602	4.8981	0.0002911	***	0.805338	HRH2_1	HRH2	0.0225683
FP007478	21	1171.9	258.757	4.5289	0.0002968	***	0.739462	PCDHB8_1	PCDHB8	0.0229143
FP011893	18	95.0742	20.3391	4.6745	0.0002994	***	0.835292	SLC46A2_1	SLC46A2	0.0229372
FP021035	16	237.623	47.3501	5.0184	0.0002999	***	0.854459	ONECUT2_1	ONECUT2	0.0229372
FP008704	14	15942.2	2949.42	5.4052	0.0002992	***	0.863136	IBTK_2	IBTK	0.0229372
FP001086	22	442.929	100.51	4.4068	0.000303	***	0.710963	FAM73A_1	FAM73A	0.0231023
FP015399	64	154.793	40.3264	3.8385	0.0003127	***	0.548758	SLC4A8_3	SLC4A8	0.0235374
FP000607	20	4175.49	927.203	4.5033	0.0003135	***	0.737557	PHC2_3	PHC2	0.0235374
FP015093	18	20038.8	4221.26	4.7471	0.0003121	***	0.785371	APOLD1_2	APOLD1	0.0235374
FP000156	17	385.541	81.2317	4.7462	0.0003127	***	0.785312	CA6_1	CA6	0.0235374
FP003160	17	1530.22	322.347	4.7471	0.0003121	***	0.785371	M1AP_1	M1AP	0.0235374
FP001721	22	149.659	34.0885	4.3903	0.0003146	***	0.70964	FAM189B_1	FAM189B	0.023548
FP003618	98	2044.59	545.59	3.7475	0.0003188	***	0.627868	FAP_1	FAP	0.0236056
FP014695	25	341.734	80.2754	4.257	0.0003221	***	0.672068	CD3D_1	CD3D	0.0236056
FP011147	22	192.53	43.4084	4.4353	0.0003195	***	0.722629	FAM49B_2	FAM49B	0.0236056
FP015184	21	472.059	104.954	4.4978	0.0003173	***	0.573419	SSPN_1	SSPN	0.0236056
FP002573	18	101.642	21.9009	4.641	0.0003199	***	0.767773	KIF26B_1	KIF26B	0.0236056
FP022919	17	370.565	78.3263	4.731	0.0003218	***	0.784348	GNRH2_1	GNRH2	0.0236056
FP019260	16	305.245	61.3374	4.9765	0.0003217	***	0.839964	RPH3AL_1	RPH3AL	0.0236056
FP001006	17	3961.26	854.776	4.6343	0.0003242	***	0.767317	RAVER2_2	RAVER2	0.0236888
FP003909	22	809.493	182.953	4.4246	0.0003272	***	0.721792	CARF_1	CARF	0.0238371
FP023691	17	619.784	128.402	4.8269	0.0003305	***	0.801163	DSCR4_1	DSCR4	0.0238939
FP021208	16	-298.939	61.9405	-4.8262	0.0003309	***	-0.801124	RPS15_1	RPS15	0.0238939
FP014253	15	8768.08	1767.36	4.9611	0.0003301	***	0.833233	KDM2A_3	KDM2A	0.0238939
FP018375	18	191.537	41.4705	4.6186	0.0003344	***	0.76625	MMP25_1	MMP25	0.0240054
FP020716	8	181.436	24.8113	7.3126	0.0003338	***	0.948218	CCDC57_1	CCDC57	0.0240054
FP015057	21	-38291.1	8682.32	-4.4102	0.0003377	***	-0.339485	KLRC1_1	KLRC1	0.0241014
FP012896	19	365.273	79.166	4.614	0.0003375	***	0.765933	MMRN2_1	MMRN2	0.0241014
FP010422	20	325.554	72.9316	4.4638	0.0003412	***	0.734587	DEFA6_1	DEFA6	0.0241406
FP003950	17	326.864	69.5011	4.703	0.0003393	***	0.78255	IDH1_3	IDH1	0.0241406
FP021741	5	326.84	17.5911	18.5799	0.0003403	***	0.995683	BST2_1	BST2	0.0241406
FP018643	21	1565.15	351.205	4.4565	0.0003465	***	0.364673	ATP2A1_2	ATP2A1	0.0244452
FP013285	21	89.8166	20.4364	4.3949	0.0003494	***	0.719463	CUZD1_1	CUZD1	0.0245089
FP004356	20	2043.88	458.958	4.4533	0.0003489	***	0.733787	RPL32_2	RPL32	0.0245089
FP011307	17	390.729	83.4448	4.6825	0.0003527	***	0.781221	KANK1_6	KANK1	0.0246699
FP019804	24	386.391	90.016	4.2925	0.0003551	***	0.717954	PEX12_1	PEX12	0.024711
FP013540	21	361.27	82.3451	4.3873	0.0003553	***	0.710384	PRKCDBP_1	PRKCDBP	0.024711
FP012881	18	169.761	37.036	4.5837	0.0003584	***	0.76384	CDHR1_1	CDHR1	0.0248
FP010332	16	1930.94	403.845	4.7814	0.0003586	***	0.798434	ASIC3_1	ASIC3	0.0248
FP011599	102	340.099	91.866	3.7021	0.0003623	***	0.510671	TRPM3_2	TRPM3	0.0248459
FP022925	17	873.317	187.009	4.6699	0.0003612	***	0.780403	ITPA_1	ITPA	0.0248459
FP022616	15	543.067	110.67	4.9071	0.0003616	***	0.746837	ZNF701_2	ZNF701	0.0248459
FP004188	18	229.28	50.1231	4.5743	0.0003651	***	0.763189	COPS8_1	COPS8	0.0249682
FP019565	20	297.117	67.0813	4.4292	0.0003674	***	0.731947	TEKT3_1	TEKT3	0.0250515
FP009272	16	110.132	23.1072	4.7661	0.0003686	***	0.797508	PAPOLB_1	PAPOLB	0.0250515
FP017536	16	282.233	59.25	4.7634	0.0003704	***	0.797343	GPR176_1	GPR176	0.0250515
FP021433	16	268.957	56.4635	4.7634	0.0003704	***	0.797339	SNAPC2_2	SNAPC2	0.0250515
FP022512	21	276.553	63.404	4.3618	0.000376	***	0.449267	AKT1S1_2	AKT1S1	0.0253604
FP017436	18	404.671	87.1404	4.6439	0.0003795	***	0.778693	MTA1_3	MTA1	0.0254566
FP022798	16	7054.36	1484.89	4.7508	0.0003789	***	0.79657	ZNF550_2	ZNF550	0.0254566
FP017951	18	2189.24	481.248	4.5491	0.0003839	***	0.761423	STRA6_1	STRA6	0.0254733
FP001425	16	4405.45	928.504	4.7447	0.0003831	***	0.796195	NBPF8_2	NBPF8	0.0254733
FP008128	16	4712.85	992.626	4.7479	0.0003809	***	0.796391	ZSCAN31_2	ZSCAN31	0.0254733
FP015017	15	437.545	89.803	4.8723	0.0003835	***	0.735515	ZNF705A_1	ZNF705A	0.0254733
FP014639	22	3341.58	768.792	4.3465	0.0003889	***	0.715607	USP28_2	USP28	0.0255975
FP024582	17	1380.18	297.9	4.633	0.0003874	***	0.777975	MAGEB2_1	MAGEB2	0.0255975
FP011796	13	231.457	46.0808	5.0229	0.0003883	***	0.834492	COL15A1_1	COL15A1	0.0255975
FP009286	20	268.931	60.217	4.466	0.00039	***	0.744904	RSPH10B_1	RSPH10B	0.0256013
FP002298	22	220.59	51.4024	4.2914	0.000394	***	0.701571	CR2_1	CR2	0.0257102
FP013869	19	123.406	27.2093	4.5354	0.0003945	***	0.760459	DGKZ_4	DGKZ	0.0257102
FP015896	16	335.062	70.8694	4.7279	0.0003948	***	0.79516	C12orf73_1	C12orf73	0.0257102
FP013674	19	889.542	199.519	4.4584	0.0003962	***	0.744339	RPS13_1	RPS13	0.0257331
FP012442	17	317.244	68.7003	4.6178	0.0003987	***	0.776962	PTER_1	PTER	0.0258271
FP006058	18	189.014	41.7546	4.5268	0.0004013	***	0.759846	EXOC1_1	EXOC1	0.0259271
FP008254	29	545.619	132.109	4.1301	0.0004071	***	0.79027	DDAH2_1	DDAH2	0.0260368
FP002834	19	489.563	110.164	4.4439	0.0004083	***	0.695133	ALK_2	ALK	0.0260368
FP004312	18	164.117	36.3175	4.5189	0.0004076	***	0.75929	JAGN1_1	JAGN1	0.0260368
FP005886	14	737.859	147.741	4.9943	0.0004062	***	0.833041	CC2D2A_2	CC2D2A	0.0260368
FP017581	7	31386.9	3767.85	8.3302	0.0004076	***	0.968	NUSAP1_2	NUSAP1	0.0260368
FP016308	17	215.005	46.7492	4.5991	0.0004132	***	0.775712	SLC46A3_1	SLC46A3	0.026281
FP016735	44	154.899	40.1598	3.8571	0.0004188	***	0.549891	AJUBA_1	AJUBA	0.0262966
FP015365	22	2304.16	534.225	4.3131	0.0004188	***	0.688825	GPD1_1	GPD1	0.0262966
FP009962	18	109.685	24.3426	4.5059	0.0004184	***	0.758357	NAPEPLD_1	NAPEPLD	0.0262966
FP008862	16	91.6002	18.9926	4.8229	0.000417	***	0.812206	HDAC2_2	HDAC2	0.0262966
FP011351	16	399.224	84.954	4.6993	0.0004157	***	0.793382	TPD52L3_1	TPD52L3	0.0262966
FP004993	21	6531.69	1496.22	4.3655	0.0004213	***	0.726998	TMEM45A_2	TMEM45A	0.0263861
FP004091	59	98.9335	26.2949	3.7625	0.0004287	***	0.441154	IRS1_1	IRS1	0.0264428
FP023385	43	119.462	30.9334	3.8619	0.0004244	***	0.609699	PARD6B_1	PARD6B	0.0264428
FP000810	26	355.919	86.6274	4.1086	0.0004294	***	0.650601	TCTEX1D4_1	TCTEX1D4	0.0264428
FP024810	22	626.252	147.063	4.2584	0.0004248	***	0.795573	UBQLN2_1	UBQLN2	0.0264428
FP014136	20	193.914	43.9005	4.4171	0.0004316	***	0.74124	EHD1_2	EHD1	0.0264428
FP021170	19	1229.15	277.891	4.4232	0.0004263	***	0.741695	PRTN3_1	PRTN3	0.0264428
FP005768	16	5844.81	1249.37	4.6782	0.0004319	***	0.792058	TMEM129_2	TMEM129	0.0264428
FP021148	16	3377.72	721.723	4.6801	0.0004304	***	0.792175	THEG_1	THEG	0.0264428
FP011340	14	101.712	21.1682	4.805	0.0004299	***	0.811172	CD274_1	CD274	0.0264428
FP024135	21	224.037	52.1488	4.2961	0.0004348	***	0.711521	SSTR3_1	SSTR3	0.0265542
FP017765	18	350.241	76.6791	4.5676	0.0004387	***	0.773583	TCF12_4	TCF12	0.0267259
FP024641	20	3503.83	806.443	4.3448	0.0004404	***	0.725371	KRBOX4_1	KRBOX4	0.026763
FP000673	24	428.579	102.088	4.1981	0.0004427	***	0.684418	MTF1_1	MTF1	0.0267703
FP006748	9	146.642	21.1125	6.9458	0.0004417	***	0.939431	LPCAT1_1	LPCAT1	0.0267703
FP017541	39	1055.57	272.343	3.8759	0.0004463	***	0.7438	BMF_2	BMF	0.0268737
FP001418	20	282.829	65.1927	4.3384	0.0004466	***	0.724861	ADAM30_1	ADAM30	0.0268737
FP015556	18	719.522	160.927	4.4711	0.0004484	***	0.755855	RPS26_1	RPS26	0.0269161
FP012542	24	33158.5	7989.69	4.1502	0.0004538	***	0.442184	C10orf68_1	C10orf68	0.0270419
FP011242	19	222.509	49.8252	4.4658	0.0004532	***	0.755468	PLEC_4	PLEC	0.0270419
FP019106	14	296.204	60.1413	4.9251	0.0004532	***	0.813989	WDR59_1	WDR59	0.0270419
FP011535	19	1194.58	272.47	4.3843	0.0004621	***	0.738741	GNE_2	GNE	0.0270762
FP012672	19	1021.73	232.952	4.386	0.0004604	***	0.738874	ZWINT_1	ZWINT	0.0270762
FP023892	19	7105.47	1620.11	4.3858	0.0004606	***	0.769757	SERPIND1_2	SERPIND1	0.0270762
FP014884	18	762.549	171.171	4.4549	0.0004632	***	0.556227	WNT5B_2	WNT5B	0.0270762
FP005483	17	2493.66	536.533	4.6477	0.0004564	***	0.790122	BCHE_1	BCHE	0.0270762
FP021222	17	356.396	76.7847	4.6415	0.0004616	***	0.789724	TCF3_2	TCF3	0.0270762
FP021379	6	15304.7	911.335	16.794	0.0004597	***	0.994723	SLC25A41_1	SLC25A41	0.0270762
FP015072	5	27615	1644.37	16.794	0.0004597	***	0.994723	TAS2R43_1	TAS2R43	0.0270762
FP019583	22	657.816	154.35	4.2619	0.0004692	***	0.708703	PIGL_1	PIGL	0.0271043
FP000705	19	4863.91	1093.27	4.449	0.0004687	***	0.595817	PPT1_1	PPT1	0.0271043
FP012789	18	128.93	28.416	4.5372	0.0004649	***	0.771502	ASCC1_1	ASCC1	0.0271043
FP016683	17	1406.3	303.332	4.6362	0.0004661	***	0.789381	ANG_2	ANG	0.0271043
FP022253	17	391.187	87.935	4.4486	0.000469	***	0.754216	LYPD5_1	LYPD5	0.0271043
FP018071	19	2866.28	644.812	4.4451	0.0004723	***	0.753963	CPEB1_3	CPEB1	0.0271728
FP023025	17	-4864	1074.07	-4.5286	0.0004726	***	-0.770907	CSRP2BP_2	CSRP2BP	0.0271728
FP019534	20	243.387	56.4603	4.3108	0.0004739	***	0.722662	GAS7_6	GAS7	0.0271839
FP018506	16	347.311	75.1602	4.6209	0.0004791	***	0.788402	C16orf45_2	C16orf45	0.0274181
FP006368	21	378.453	89.0955	4.2477	0.0004841	***	0.70753	TBCK_1	TBCK	0.0275346
FP012701	18	218.655	49.3314	4.4324	0.0004845	***	0.753026	C10orf107_1	C10orf107	0.0275346
FP025268	17	171.287	37.0996	4.617	0.0004826	***	0.740667	ZIC3_1	ZIC3	0.0275346
FP016901	18	870.498	196.634	4.427	0.0004897	***	0.752631	FANCM_1	FANCM	0.0276382
FP008775	16	373.833	81.0894	4.6101	0.0004886	***	0.787703	COQ3_1	COQ3	0.0276382
FP018132	13	145.334	28.6963	5.0646	0.0004887	***	0.848231	ANPEP_1	ANPEP	0.0276382
FP008226	46	355.177	93.4181	3.802	0.0004926	***	0.275679	LTB_1	LTB	0.0277012
FP006032	16	293.372	65.1114	4.5057	0.0004938	***	0.769319	CWH43_1	CWH43	0.0277012
FP006227	14	1012.91	207.961	4.8707	0.0004942	***	0.826565	PLAC8_2	PLAC8	0.0277012
FP004195	21	1276.91	301.706	4.2323	0.000501	***	0.68425	RAB17_1	RAB17	0.0278208
FP008867	20	352.688	82.267	4.2871	0.0004986	***	0.72076	NT5DC1_2	NT5DC1	0.0278208
FP019988	20	135.737	31.6743	4.2854	0.0005005	***	0.720621	KRT19_1	KRT19	0.0278208
FP021819	16	823.961	179.308	4.5952	0.000502	***	0.786734	RFXANK_1	RFXANK	0.0278208
FP017878	14	84.0465	17.8273	4.7145	0.0005017	***	0.80585	C15orf61_1	C15orf61	0.0278208
FP022606	16	3105.05	676.11	4.5925	0.0005045	***	0.786557	ZNF766_2	ZNF766	0.0278964
FP006029	17	213.048	47.4561	4.4894	0.0005095	***	0.768178	OCIAD1_1	OCIAD1	0.0281095
FP002464	15	166.23	35.4201	4.6931	0.0005204	***	0.804562	TRIM17_1	TRIM17	0.0286465
FP018566	21	373.461	87.5803	4.2642	0.0005238	***	0.718902	ZP2_1	ZP2	0.0287323
FP007492	17	279.014	62.3578	4.4744	0.0005243	***	0.767126	PCDHGB2_1	PCDHGB2	0.0287323
FP017745	23	444.614	108.004	4.1166	0.0005356	***	0.332606	RAB27A_2	RAB27A	0.0289638
FP021204	23	312.325	75.955	4.112	0.0005414	***	0.489457	MUM1_2	MUM1	0.0289638
FP007475	22	1621.65	390.484	4.1529	0.0005404	***	0.689794	PCDHB5_1	PCDHB5	0.0289638
FP001873	21	2664.88	634.048	4.203	0.0005347	***	0.703777	ITLN1_1	ITLN1	0.0289638
FP008506	21	105.761	25.1944	4.1978	0.0005409	***	0.703341	PTK7_2	PTK7	0.0289638
FP003003	17	228.339	52.1707	4.3768	0.0005415	***	0.748892	FANCL_1	FANCL	0.0289638
FP017896	16	329.031	72.2185	4.556	0.0005392	***	0.784157	PAQR5_2	PAQR5	0.0289638
FP019799	16	2126.8	466.131	4.5627	0.0005327	***	0.784594	SLFN12_1	SLFN12	0.0289638
FP020191	16	302.264	66.3755	4.5539	0.0005413	***	0.784011	SNX11_1	SNX11	0.0289638
FP025341	16	131.064	29.3304	4.4685	0.0005302	***	0.766712	GABRE_1	GABRE	0.0289638
FP025369	15	6686.25	1431.45	4.671	0.0005406	***	0.803218	ATP2B3_1	ATP2B3	0.0289638
FP013971	22	225.826	53.8862	4.1908	0.0005493	***	0.702747	MPEG1_1	MPEG1	0.0290019
FP015236	21	425.094	101.353	4.1942	0.0005452	***	0.681949	YARS2_1	YARS2	0.0290019
FP009912	19	338.853	78.7774	4.3014	0.0005491	***	0.732297	GIGYF1_1	GIGYF1	0.0290019
FP005503	18	145.401	32.635	4.4554	0.0005438	***	0.765777	PHC3_1	PHC3	0.0290019
FP010980	18	21719.4	4968.62	4.3713	0.0005475	***	0.748482	INTS8_2	INTS8	0.0290019
FP003949	17	-5160.91	1159.48	-4.451	0.0005483	***	-0.76547	C2orf80_1	C2orf80	0.0290019
FP001168	15	75.7767	16.2663	4.6585	0.0005523	***	0.802457	RPAP2_1	RPAP2	0.0290977
FP004297	39	237.808	62.3887	3.8117	0.0005535	***	0.663234	LHFPL4_1	LHFPL4	0.0290985
FP005857	17	4418.13	994.234	4.4437	0.000556	***	0.76495	PSAPL1_1	PSAPL1	0.0291674
FP012687	23	16211.2	3918.02	4.1376	0.0005596	***	0.504869	C10orf40_1	C10orf40	0.0292523
FP017656	17	1943.65	428.566	4.5352	0.00056	***	0.782771	SPG11_2	SPG11	0.0292523
FP007222	20	348.771	82.5015	4.2275	0.000567	***	0.715887	TSSK1B_1	TSSK1B	0.029555
FP023642	23	327.044	79.2488	4.1268	0.0005736	***	0.687509	DONSON_1	DONSON	0.0298357
FP004220	15	39.2118	8.21348	4.7741	0.0005769	***	0.821266	MYEOV2_1	MYEOV2	0.0299439
FP017737	46	150.265	40.1884	3.739	0.0005784	***	0.579774	FAM214A_2	FAM214A	0.0299584
FP015608	36	178.306	46.6905	3.8189	0.0005809	***	0.606183	NAB2_1	NAB2	0.029977
FP013837	15	306.318	66.1758	4.6289	0.0005812	***	0.800626	HSD17B12_1	HSD17B12	0.029977
FP024671	22	209.736	50.3825	4.1629	0.0005845	***	0.700365	ZNF630_2	ZNF630	0.0299807
FP012884	21	397.837	95.6326	4.1601	0.0005882	***	0.700123	RGR_1	RGR	0.0299807
FP021090	20	371.071	88.0499	4.2143	0.0005833	***	0.714801	SERPINB8_1	SERPINB8	0.0299807
FP020737	18	298.154	67.5451	4.4141	0.0005886	***	0.762823	ZNF750_1	ZNF750	0.0299807
FP016503	16	992.02	219.997	4.5092	0.0005873	***	0.781025	UCHL3_1	UCHL3	0.0299807
FP015875	14	162.433	35.1328	4.6234	0.0005867	***	0.800287	UTP20_1	UTP20	0.0299807
FP023183	52	177.62	48.0756	3.6946	0.0005946	***	0.529042	NFS1_1	NFS1	0.0300371
FP004600	21	466.882	112.29	4.1578	0.0005911	***	0.473745	CXCR6_2	CXCR6	0.0300371
FP007018	21	5705.04	1372.46	4.1568	0.0005924	***	0.699845	RAD17_6	RAD17	0.0300371
FP017077	17	142.248	32.2599	4.4094	0.0005939	***	0.762482	RAD51B_1	RAD51B	0.0300371
FP019977	24	155.259	38.5494	4.0275	0.0006083	***	0.660154	KRTAP17-1_1	KRTAP17-1	0.0300725
FP004117	22	2015.94	486.733	4.1418	0.0006126	***	0.69855	SP100_2	SP100	0.0300725
FP008917	21	34419.2	8293.3	4.1502	0.0006012	***	0.69928	TPD52L1_3	TPD52L1	0.0300725
FP001165	19	-392.063	92.0147	-4.2609	0.0005975	***	-0.729074	BTBD8_1	BTBD8	0.0300725
FP024479	19	189.513	44.6145	4.2478	0.000614	***	0.728023	TCEANC_1	TCEANC	0.0300725
FP015850	18	5005.81	1156.83	4.3272	0.0005982	***	0.745132	NEDD1_3	NEDD1	0.0300725
FP018223	18	173.113	40.1329	4.3135	0.0006149	***	0.744081	MRPL28_1	MRPL28	0.0300725
FP007437	17	375.349	83.5189	4.4942	0.0006037	***	0.732441	ANKHD1_5	ANKHD1	0.0300725
FP007950	17	331.662	73.7831	4.4951	0.0006027	***	0.780066	TFAP2A_3	TFAP2A	0.0300725
FP009372	17	1216.31	270.849	4.4907	0.0006075	***	0.779771	TOMM7_1	TOMM7	0.0300725
FP009862	17	822.286	187.097	4.395	0.0006107	***	0.761433	TRIM4_1	TRIM4	0.0300725
FP024234	17	313.854	71.2622	4.4042	0.0005999	***	0.762104	CHADL_1	CHADL	0.0300725
FP003054	16	57863.2	12895.2	4.4872	0.0006115	***	0.779529	C1D_2	C1D	0.0300725
FP010111	13	728.841	148.383	4.9119	0.0006122	***	0.762197	IMPDH1_1	IMPDH1	0.0300725
FP019272	11	190.153	34.885	5.4509	0.0006081	***	0.887618	ABR_6	ABR	0.0300725
FP016199	9	89.7823	13.7258	6.5411	0.0006103	***	0.936491	PUS1_1	PUS1	0.0300725
FP015692	20	820.351	195.94	4.1867	0.0006191	***	0.712501	LLPH_1	LLPH	0.0301578
FP002709	14	206.482	44.9597	4.5926	0.0006188	***	0.626534	SDC1_2	SDC1	0.0301578
FP024583	25	11716	2917.67	4.0155	0.000626	***	0.659042	MAGEB3_1	MAGEB3	0.0301886
FP017529	24	419.233	104.442	4.014	0.0006283	***	0.76727	FAM98B_1	FAM98B	0.0301886
FP005146	20	224.71	53.7836	4.178	0.0006308	***	0.711771	DTX3L_1	DTX3L	0.0301886
FP022659	19	729.954	172.164	4.2399	0.0006243	***	0.727384	PRPF31_1	PRPF31	0.0301886
FP003482	18	129.912	30.6467	4.239	0.0006254	***	0.591016	MZT2B_1	MZT2B	0.0301886
FP005374	17	253.148	57.8045	4.3794	0.0006293	***	0.760293	PLSCR1_1	PLSCR1	0.0301886
FP002122	16	2066.83	462.297	4.4708	0.0006301	***	0.778406	C1orf27_2	C1orf27	0.0301886
FP007626	16	211.347	47.2031	4.4774	0.0006225	***	0.778861	GM2A_1	GM2A	0.0301886
FP004978	15	282.066	61.453	4.5899	0.0006216	***	0.79819	CPOX_1	CPOX	0.0301886
FP024648	28	211.334	54.1277	3.9044	0.0006331	***	0.701586	P17_1	P17	0.0302192
FP003489	18	338.062	78.6498	4.2983	0.0006339	***	0.742908	CFC1B_1	CFC1B	0.0302192
FP001800	20	382.669	91.6854	4.1737	0.0006367	***	0.711408	SH2D2A_1	SH2D2A	0.0302495
FP012764	18	1267.39	289.816	4.3731	0.000637	***	0.759833	LRRC20_1	LRRC20	0.0302495
FP018876	22	194.217	47.6204	4.0784	0.0006405	***	0.683226	COQ9_1	COQ9	0.0303488
FP017979	18	896.296	208.858	4.2914	0.0006428	***	0.742372	COMMD4_1	COMMD4	0.0303488
FP020832	14	288.68	63.1458	4.5716	0.0006417	***	0.79703	CEP192_1	CEP192	0.0303488
FP012475	76	-13625.8	3814.69	-3.5719	0.0006461	***	-0.573178	SPAG6_2	SPAG6	0.0304461
FP013860	18	242.201	56.4982	4.2869	0.0006487	***	0.757981	C11orf94_1	C11orf94	0.0304705
FP025416	15	7927.64	1736.63	4.565	0.0006491	***	0.796605	DNASE1L1_1	DNASE1L1	0.0304705
FP022260	19	251.887	59.6862	4.2202	0.0006505	***	0.725787	ZNF155_1	ZNF155	0.0304779
FP006168	65	278.211	77.1679	3.6053	0.0006566	***	0.4769	USO1_1	USO1	0.03054
FP007203	21	-636.323	154.736	-4.1123	0.000654	***	-0.695993	TSLP_3	TSLP	0.03054
FP022173	18	238.565	55.7301	4.2807	0.0006568	***	0.741541	CCDC97_1	CCDC97	0.03054
FP014775	15	139.88	30.6838	4.5588	0.0006561	***	0.79621	SIAE_1	SIAE	0.03054
FP014847	21	164.653	40.081	4.108	0.0006603	***	0.408355	SNX19_1	SNX19	0.0305868
FP014622	17	1440.5	330.81	4.3545	0.0006603	***	0.75846	DLAT_1	DLAT	0.0305868
FP013291	26	253.19	64.3555	3.9342	0.0006622	***	-0.00644828	BUB3_1	BUB3	0.0306171
FP018245	15	132.616	28.3055	4.6852	0.000666	***	0.850633	JMJD8_1	JMJD8	0.0306198
FP018568	14	5947.39	1268.93	4.6869	0.0006641	***	0.816294	CRYM_1	CRYM	0.0306198
FP017404	13	155.305	31.9823	4.856	0.0006654	***	0.837978	TDRD9_1	TDRD9	0.0306198
FP002743	20	139.155	33.5578	4.1467	0.000675	***	0.709125	POMC_1	POMC	0.0307867
FP002708	17	888.861	204.675	4.3428	0.0006753	***	0.757594	LAPTM4A_1	LAPTM4A	0.0307867
FP007700	17	458.06	105.406	4.3457	0.0006716	***	0.723938	PTTG1_1	PTTG1	0.0307867
FP008391	14	363.608	75.0348	4.8459	0.0006755	***	0.837458	CLPSL2_1	CLPSL2	0.0307867
FP011210	14	147.106	31.4595	4.676	0.0006759	***	0.81566	ZNF696_1	ZNF696	0.0307867
FP013039	21	190.233	46.4373	4.0965	0.0006774	***	0.694613	PYROXD2_1	PYROXD2	0.0307979
FP013452	19	-418.61	99.6918	-4.199	0.0006799	***	-0.72406	SYT8_1	SYT8	0.0308544
FP022950	25	104.973	26.374	3.9801	0.0006813	***	0.655737	ADRA1D_1	ADRA1D	0.0308609
FP015136	98	682.99	194.155	3.5178	0.0006876	***	0.309891	PLCZ1_1	PLCZ1	0.0309768
FP005380	28	404.893	104.616	3.8703	0.0006908	***	0.726885	CPA3_1	CPA3	0.0309768
FP001968	22	6985.48	1689.99	4.1334	0.0006946	***	0.707992	TBX19_1	TBX19	0.0309768
FP012049	21	216.49	53.0289	4.0825	0.0006989	***	0.693377	TTC16_1	TTC16	0.0309768
FP011451	20	726.401	175.862	4.1305	0.000699	***	0.707743	DNAJA1_2	DNAJA1	0.0309768
FP007827	19	260.663	62.142	4.1947	0.0006861	***	0.723699	COL23A1_1	COL23A1	0.0309768
FP001627	17	-23022.5	5320.53	-4.3271	0.0006961	***	-0.756425	S100A12_1	S100A12	0.0309768
FP011818	17	312.591	72.2014	4.3294	0.000693	***	0.756598	BAAT_1	BAAT	0.0309768
FP006813	16	81.9482	18.5535	4.4169	0.0006957	***	0.774665	GOLPH3_1	GOLPH3	0.0309768
FP012582	14	187.871	40.3001	4.6618	0.0006917	***	0.814826	FXYD4_1	FXYD4	0.0309768
FP012781	14	4206.44	902.211	4.6624	0.0006911	***	0.814859	PSAP_1	PSAP	0.0309768
FP007110	11	133.208	24.9625	5.3363	0.0006972	***	0.854118	DHFR_1	DHFR	0.0309768
FP022208	25	374.782	93.6794	4.0007	0.0007024	***	0.667446	ZNF526_1	ZNF526	0.0310714
FP006057	14	133.424	28.6883	4.6508	0.0007042	***	0.814179	NMU_1	NMU	0.031095
FP003538	29	686.186	178.962	3.8343	0.0007192	***	0.668358	ZEB2_1	ZEB2	0.0313783
FP006675	27	162.505	41.9991	3.8693	0.0007327	***	0.852388	ING2_1	ING2	0.0313783
FP006196	22	638.515	156.928	4.0688	0.0007205	***	0.69217	ANXA3_1	ANXA3	0.0313783
FP005375	21	156.101	38.3307	4.0725	0.0007147	***	0.692492	ZIC4_2	ZIC4	0.0313783
FP006185	21	11223.4	2723.55	4.1209	0.0007138	***	0.706915	SHROOM3_1	SHROOM3	0.0313783
FP022750	21	2034.27	500.538	4.0642	0.000728	***	0.691754	CCDC106_1	CCDC106	0.0313783
FP023640	20	171.24	41.1457	4.1618	0.0007349	***	0.720983	DONSON_3	DONSON	0.0313783
FP000266	18	3626.24	843.244	4.3004	0.000733	***	0.754413	ZBTB17_1	ZBTB17	0.0313783
FP016636	18	-6302.08	1465.48	-4.3004	0.000733	***	-0.754413	CUL4A_3	CUL4A	0.0313783
FP001856	17	225.888	52.4467	4.307	0.0007237	***	0.754915	ATP1A4_1	ATP1A4	0.0313783
FP003086	17	4083.49	949.572	4.3003	0.0007331	***	0.754413	ADD2_3	ADD2	0.0313783
FP016658	17	3845.19	875.531	4.3918	0.0007285	***	0.772901	UPF3A_3	UPF3A	0.0313783
FP017446	17	3495.04	812.734	4.3003	0.0007331	***	0.754413	TUBGCP5_1	TUBGCP5	0.0313783
FP022153	17	335.207	77.7148	4.3133	0.0007149	***	0.755389	MIA_1	MIA	0.0313783
FP023735	17	330.735	76.8785	4.302	0.0007306	***	0.754541	ABCG1_2	ABCG1	0.0313783
FP023953	17	7813.87	1817.03	4.3003	0.0007331	***	0.754413	ADORA2A_4	ADORA2A	0.0313783
FP018763	15	208.129	46.3124	4.494	0.0007342	***	0.814708	ZNF843_1	ZNF843	0.0313783
FP014583	14	151.414	32.7002	4.6304	0.000728	***	0.812968	ACAT1_1	ACAT1	0.0313783
FP017904	14	1377.37	297.124	4.6357	0.0007217	***	0.813283	UACA_1	UACA	0.0313783
FP009577	20	258.312	62.9521	4.1033	0.0007414	***	0.705403	ZPBP_1	ZPBP	0.0314372
FP023922	15	439.085	97.7834	4.4904	0.0007389	***	0.791775	LL22NC03-63E9.3_1	LL22NC03-63E9.3	0.0314372
FP005149	14	320.783	69.4136	4.6213	0.0007388	***	0.812429	PARP15_2	PARP15	0.0314372
FP023189	13	2845.51	594.703	4.7848	0.0007404	***	0.834262	EPB41L1_1	EPB41L1	0.0314372
FP007312	14	122.188	27.2374	4.486	0.0007446	***	0.791487	P4HA2_1	P4HA2	0.0315184
FP011559	19	124.727	30.0215	4.1546	0.0007461	***	0.720381	IGFBPL1_1	IGFBPL1	0.0315275
FP005020	22	6344.55	1565.93	4.0516	0.0007486	***	0.690639	BBX_2	BBX	0.0315788
FP007179	16	310.05	70.8503	4.3761	0.0007499	***	0.771785	FAM174A_1	FAM174A	0.0315794
FP009008	17	334.431	78.0024	4.2874	0.0007516	***	0.753435	IFNGR1_2	IFNGR1	0.0315968
FP007168	19	202.666	48.8371	4.1498	0.0007536	***	0.719986	CAST_5	CAST	0.0316267
FP018238	17	143.328	33.4516	4.2847	0.0007557	***	0.753223	WFIKKN1_1	WFIKKN1	0.0316607
FP000925	12	152.529	30.6381	4.9784	0.0007611	***	0.856509	LRP8_2	LRP8	0.0318327
FP004644	21	2104.85	520.619	4.043	0.0007632	***	0.689867	CAMP_1	CAMP	0.0318662
FP014928	14	3435.39	747.066	4.5985	0.0007668	***	0.793004	PLEKHG6_2	PLEKHG6	0.0319622
FP018446	20	91.1058	22.0085	4.1396	0.00077	***	0.742959	METTL22_1	METTL22	0.0320324
FP001236	18	4060	950.081	4.2733	0.0007724	***	0.752359	AMY2A_1	AMY2A	0.0320324
FP007782	16	319.25	73.217	4.3603	0.0007721	***	0.770655	CDHR2_1	CDHR2	0.0320324
FP002001	17	-3539.65	812.928	-4.3542	0.0007809	***	-0.770215	PRRC2C_2	PRRC2C	0.0323303
FP009049	14	-15580.9	3397.87	-4.5855	0.0007833	***	-0.810269	EPM2A_3	EPM2A	0.0323751
FP022696	14	1732.32	377.988	4.583	0.0007865	***	0.810118	KIR2DL4_3	KIR2DL4	0.0324527
FP002909	14	4685.26	1022.77	4.5809	0.0007891	***	0.809993	MTA3_4	MTA3	0.0325054
FP011743	19	478.997	116.13	4.1247	0.0007944	***	0.648559	FBP2_1	FBP2	0.0325844
FP016883	19	251.466	60.9588	4.1252	0.0007935	***	0.717916	SEC23A_1	SEC23A	0.0325844
FP006714	7	1312.06	181.737	7.2195	0.000795	***	0.959844	F11_1	F11	0.0325844
FP022967	23	299.404	75.2171	3.9805	0.000801	***	0.717077	CHGB_1	CHGB	0.0326125
FP019405	17	753.365	173.537	4.3412	0.0007998	***	0.769279	AIPL1_1	AIPL1	0.0326125
FP019394	15	280.624	63.1321	4.445	0.0007998	***	0.788763	C1QBP_1	C1QBP	0.0326125
FP012568	14	125.909	27.5283	4.5738	0.0007984	***	0.809558	ZNF248_2	ZNF248	0.0326125
FP003836	19	50.4451	12.2455	4.1195	0.0008031	***	0.717435	COQ10B_1	COQ10B	0.0326439
FP004068	22	206.081	51.3157	4.0159	0.0008105	***	0.687438	EPHA4_1	EPHA4	0.0327133
FP002306	19	1581.14	384.37	4.1136	0.0008131	***	0.750737	LAMB3_2	LAMB3	0.0327133
FP012202	19	2833.69	689.197	4.1116	0.0008165	***	0.392516	ADAMTS13_1	ADAMTS13	0.0327133
FP011756	18	974.721	233.255	4.1788	0.0008068	***	0.733433	ERCC6L2_1	ERCC6L2	0.0327133
FP010121	17	81.0899	18.728	4.3299	0.0008168	***	0.768456	FLNC_1	FLNC	0.0327133
FP020720	17	1709.73	402.656	4.2461	0.0008142	***	0.75027	SLC16A3_4	SLC16A3	0.0327133
FP018437	13	652.756	143.139	4.5603	0.0008163	***	0.808732	NAGPA_1	NAGPA	0.0327133
FP018484	10	282.685	45.5597	6.2047	0.0008083	***	0.930142	TXNDC11_1	TXNDC11	0.0327133
FP002599	5	511.883	36.9125	13.8675	0.0008117	***	0.99229	OR2T11_1	OR2T11	0.0327133
FP015965	19	287.825	70.0199	4.1106	0.0008182	***	0.716684	MVK_1	MVK	0.032716
FP023980	27	385.301	100.805	3.8223	0.0008246	***	0.615137	CRYBA4_1	CRYBA4	0.0327201
FP005144	21	167.291	41.2715	4.0534	0.0008259	***	0.701055	KPNA1_1	KPNA1	0.0327201
FP024133	20	620.689	153.063	4.0551	0.0008229	***	0.37364	IL2RB_1	IL2RB	0.0327201
FP017413	19	77.6756	18.9157	4.1064	0.0008254	***	0.716327	SIVA1_1	SIVA1	0.0327201
FP006667	16	350.74	81.1219	4.3236	0.0008263	***	0.768	RP11-389E17.1_1	RP11-389E17.1	0.0327201
FP008135	13	291.984	61.9078	4.7164	0.0008209	***	0.830585	ZNF311_1	ZNF311	0.0327201
FP001074	16	26672	6299.93	4.2337	0.0008341	***	0.67128	ASB17_1	ASB17	0.0329347
FP006878	16	320.708	74.2661	4.3184	0.0008344	***	0.763008	PRKAA1_1	PRKAA1	0.0329347
FP020401	23	1474.1	375.686	3.9238	0.0008408	***	0.659518	SCN4A_1	SCN4A	0.0330809
FP006233	21	870.752	217.679	4.0002	0.0008395	***	0.68601	MRPS18C_1	MRPS18C	0.0330809
FP003508	19	221.132	53.2096	4.1559	0.000845	***	0.731567	LYPD1_2	LYPD1	0.0331127
FP011132	15	213.898	48.4627	4.4137	0.0008449	***	0.786645	NDUFB9_1	NDUFB9	0.0331127
FP011498	15	3171.54	719.103	4.4104	0.0008497	***	0.786425	C9orf131_1	C9orf131	0.0331127
FP013505	14	103.424	22.0204	4.6967	0.0008458	***	0.829504	STIM1_1	STIM1	0.0331127
FP005584	12	205.656	41.9852	4.8983	0.0008496	***	0.852771	CAMK2N2_1	CAMK2N2	0.0331127
FP013790	6	5756.15	640.624	8.9852	0.0008492	***	0.965611	CD59_2	CD59	0.0331127
FP014390	20	336.576	83.324	4.0394	0.0008514	***	0.699817	XRRA1_1	XRRA1	0.0331244
FP011556	16	439.439	102.038	4.3066	0.0008527	***	0.766758	SLC25A51_1	SLC25A51	0.0331244
FP013553	16	153.281	35.5991	4.3058	0.0008541	***	0.766694	RRP8_1	RRP8	0.0331264
FP019496	27	315.064	82.2517	3.8305	0.0008562	***	0.725716	ALOX12B_1	ALOX12B	0.0331555
FP021017	20	263.157	64.4088	4.0857	0.000862	***	0.714564	CCDC68_1	CCDC68	0.0333214
FP021319	18	276.279	66.6481	4.1453	0.0008632	***	0.730704	EBI3_1	EBI3	0.0333214
FP003816	21	1985.7	498.25	3.9853	0.0008677	***	0.684661	STAT4_1	STAT4	0.0334425
FP006644	17	1404.47	333.868	4.2067	0.0008791	***	0.48935	AADAT_1	AADAT	0.0338288
FP001033	17	2261.14	537.995	4.2029	0.0008855	***	0.746903	C1orf141_1	C1orf141	0.0340218
FP005445	19	1194.91	289.416	4.1287	0.0008928	***	0.729331	CCNL1_1	CCNL1	0.0341156
FP013313	18	344.245	83.3768	4.1288	0.0008926	***	0.729339	BCCIP_1	BCCIP	0.0341156
FP019024	13	237.899	52.8054	4.5052	0.0008935	***	0.805312	HAS3_2	HAS3	0.0341156
FP012567	9	492.815	80.8822	6.093	0.0008896	***	0.838712	MTRNR2L7_1	MTRNR2L7	0.0341156
FP021991	26	272.806	71.125	3.8356	0.0008999	***	0.779934	ALKBH6_1	ALKBH6	0.0341372
FP018061	22	1761.29	443.74	3.9692	0.0008995	***	0.683183	IL16_5	IL16	0.0341372
FP018872	21	519.216	130.877	3.9672	0.0009034	***	0.683001	CCL22_1	CCL22	0.0341372
FP019556	17	330.383	78.7184	4.197	0.0008957	***	0.746441	ELAC2_2	ELAC2	0.0341372
FP005703	14	166.95	37.1143	4.4983	0.0009038	***	0.804875	CEP19_1	CEP19	0.0341372
FP021925	6	263.01	29.7069	8.8535	0.0008987	***	0.967994	PDCD2L_1	PDCD2L	0.0341372
FP000043	3	395.033	0.560542	704.73	0.0009033	***	0.999998	ATAD3B_1	ATAD3B	0.0341372
FP024170	21	73.9607	18.444	4.01	0.0009073	***	0.697208	MAFF_2	MAFF	0.0342168
FP024997	22	371.428	94.6534	3.9241	0.0009113	***	0.669066	TMSB15A_1	TMSB15A	0.0343112
FP012212	17	243.457	58.1399	4.1874	0.0009126	***	0.561941	SARDH_2	SARDH	0.0343112
FP021375	18	344.903	83.8404	4.1138	0.0009202	***	0.728097	GTF2F1_3	GTF2F1	0.0343341
FP015997	17	276.695	66.1017	4.1859	0.0009153	***	0.745563	FAM109A_1	FAM109A	0.0343341
FP019331	12	86.4078	18.6077	4.6437	0.0009169	***	0.826546	SHPK_1	SHPK	0.0343341
FP014260	10	811.178	147.797	5.4885	0.0009177	***	0.900799	CLCF1_2	CLCF1	0.0343341
FP000089	5	443.68	33.3752	13.2937	0.0009199	***	0.991619	ARHGEF16_2	ARHGEF16	0.0343341
FP018134	17	294.494	70.4267	4.1816	0.0009231	***	0.745219	AP3S2_1	AP3S2	0.0343379
FP021571	15	1642.73	376.458	4.3636	0.0009224	***	0.783211	ZNF433_1	ZNF433	0.0343379
FP020882	21	386.694	97.7848	3.9545	0.0009293	***	0.681834	AQP4_2	AQP4	0.034401
FP015977	20	-958.681	239.725	-3.9991	0.0009291	***	-0.696228	C12orf76_1	C12orf76	0.034401
FP014177	18	383.082	91.702	4.1775	0.0009304	***	0.746012	MAP3K11_3	MAP3K11	0.034401
FP019982	18	-30290.7	7370.4	-4.1098	0.0009277	***	-0.734709	KRT37_1	KRT37	0.034401
FP003050	90	298.875	86.9966	3.4355	0.0009355	***	0.419382	MEIS1_1	MEIS1	0.0344375
FP005491	63	205.893	58.8617	3.4979	0.0009364	***	0.562602	MECOM_4	MECOM	0.0344375
FP007567	22	11501.2	2940.42	3.9114	0.000938	***	0.667872	SPINK9_1	SPINK9	0.0344375
FP012520	21	409.045	103.551	3.9502	0.0009384	***	0.618345	LYZL1_1	LYZL1	0.0344375
FP021236	14	100.406	22.4311	4.4762	0.0009373	***	0.803478	MOB3A_1	MOB3A	0.0344375
FP024801	17	134.404	32.2374	4.1692	0.0009455	***	0.744237	FAM104B_1	FAM104B	0.0346462
FP022232	21	293.194	74.3278	3.9446	0.0009501	***	0.600751	TEX101_1	TEX101	0.0347034
FP002991	18	18445.6	4427.58	4.1661	0.0009513	***	0.743986	CCDC88A_2	CCDC88A	0.0347034
FP012078	9	144.23	23.9702	6.017	0.0009503	***	0.926194	PTGES2_1	PTGES2	0.0347034
FP007805	19	1182.76	288.903	4.094	0.0009579	***	0.72644	F12_1	F12	0.0348923
FP008756	16	167.498	39.4996	4.2405	0.0009641	***	0.761839	LYRM2_1	LYRM2	0.0350142
FP022762	15	163.963	37.7859	4.3393	0.0009629	***	0.78151	NLRP5_1	NLRP5	0.0350142
FP001602	30	252.357	67.1615	3.7575	0.0009702	***	0.547627	KPRP_1	KPRP	0.035079
FP011991	17	9153.09	2202.36	4.156	0.0009701	***	0.743185	RC3H2_2	RC3H2	0.035079
FP013316	16	161.775	38.1877	4.2363	0.0009716	***	0.761523	DHX32_1	DHX32	0.035079
FP009845	13	247.928	55.6561	4.4546	0.0009712	***	0.802101	PTCD1_1	PTCD1	0.035079
FP025112	21	-1693.35	420.464	-4.0273	0.0009744	***	-0.672073	DOCK11_2	DOCK11	0.0351285
FP008782	20	-1044.31	262.73	-3.9749	0.000979	***	-0.402078	SIM1_1	SIM1	0.0351742
FP011570	16	268.889	63.5388	4.2319	0.0009796	***	0.761189	CNTNAP3B_1	CNTNAP3B	0.0351742
FP011834	15	349.634	78.5991	4.4483	0.0009814	***	0.801694	NIPSNAP3B_1	NIPSNAP3B	0.0351742
FP017093	15	2123.35	490.488	4.3291	0.0009803	***	0.287175	SRSF5_1	SRSF5	0.0351742
FP005145	20	148.423	37.3894	3.9697	0.0009902	***	0.693575	PARP9_2	PARP9	0.0354379
FP012358	16	12269.8	2903.86	4.2253	0.0009917	***	0.760692	AKR1C2_2	AKR1C2	0.0354399
FP004642	17	405.254	97.8222	4.1428	0.0009955	***	0.74212	MAP4_1	MAP4	0.035524
FP015822	20	2543.92	641.399	3.9662	0.0009977	***	0.693262	CRADD_1	CRADD	0.0355508
FP024316	20	147.995	37.3309	3.9644	0.001002	**	0.6931	KIAA0930_3	KIAA0930	0.0355848
FP000284	19	417.4	105.277	3.9648	0.001001	**	0.693132	CROCC_2	CROCC	0.0355848
FP023506	16	210.674	49.9332	4.2191	0.001003	**	0.760222	C20orf195_1	C20orf195	0.0355848
FP007051	24	1317.45	342.552	3.846	0.001008	**	0.652034	ARHGEF28_2	ARHGEF28	0.0357105
FP017385	21	-578.844	146.239	-3.9582	0.0010151	**	-0.692534	CDC42BPB_2	CDC42BPB	0.0358071
FP001471	18	307.489	75.6354	4.0654	0.001015	**	0.724035	GJA5_2	GJA5	0.0358071
FP002672	16	-1528.6	362.781	-4.2136	0.0010136	**	-0.759797	GREB1_2	GREB1	0.0358071
FP017810	14	67.0769	14.6593	4.5757	0.001017	**	0.822657	DAPK2_1	DAPK2	0.0358226
FP007121	20	3366.24	850.823	3.9564	0.001019	**	0.751432	XRCC4_1	XRCC4	0.0358416
FP022675	14	7417.32	1676.51	4.4243	0.001021	**	0.800137	LILRB5_1	LILRB5	0.0358606
FP021211	16	78.6173	18.7035	4.2033	0.001033	**	0.759018	C19orf25_1	C19orf25	0.0362303
FP007922	16	116.679	27.776	4.2007	0.001038	**	0.758816	C6orf201_1	C6orf201	0.0363537
FP001789	26	217.916	57.7324	3.7746	0.001043	**	0.626947	ISG20L2_2	ISG20L2	0.0363731
FP021563	21	289.091	74.0672	3.9031	0.001042	**	0.677043	ZNF441_1	ZNF441	0.0363731
FP021864	20	837.865	212.344	3.9458	0.001043	**	0.691401	ZNF43_2	ZNF43	0.0363731
FP009572	17	4616.5	1121.69	4.1157	0.00105	**	0.739927	SUN3_1	SUN3	0.0365653
FP014058	23	153.305	39.7168	3.8599	0.001055	**	0.66296	C11orf48_1	C11orf48	0.0366184
FP022406	16	289.736	69.1263	4.1914	0.001056	**	0.758101	PLA2G4C_1	PLA2G4C	0.0366184
FP016411	12	201.837	42.5541	4.7431	0.001054	**	0.845137	SLC25A30_1	SLC25A30	0.0366184
FP005205	15	331.463	79.1134	4.1897	0.00106	**	0.757971	MGLL_3	MGLL	0.0367053
FP011673	21	-6481.91	1646.79	-3.9361	0.001065	**	-0.690512	ZCCHC6_2	ZCCHC6	0.0367575
FP002782	19	92.9057	23.3167	3.9845	0.001066	**	0.705734	PREB_1	PREB	0.0367575
FP017734	14	1599.54	363.665	4.3984	0.001066	**	0.798443	ARPP19_2	ARPP19	0.0367575
FP011460	19	144.791	35.8446	4.0394	0.00107	**	0.721821	AQP3_1	AQP3	0.0368437
FP007990	12	304.288	67.0588	4.5376	0.001079	**	0.820425	DTNBP1_1	DTNBP1	0.0371016
FP017625	19	1415.81	355.987	3.9771	0.001083	**	0.705077	LCMT2_1	LCMT2	0.0371351
FP008109	18	1930.32	478.526	4.0339	0.001082	**	0.721348	HIST1H3I_1	HIST1H3I	0.0371351
FP003774	23	102.519	26.652	3.8466	0.001088	**	0.661672	DNAJC10_1	DNAJC10	0.0372545
FP017770	22	113.961	29.3663	3.8807	0.001096	**	0.674929	ALDH1A2_2	ALDH1A2	0.0373366
FP007335	21	134.296	33.8191	3.971	0.001097	**	0.70453	AFF4_1	AFF4	0.0373366
FP021185	17	348.854	85.2446	4.0924	0.001098	**	0.691586	ABCA7_2	ABCA7	0.0373366
FP004458	15	224.497	52.6166	4.2667	0.001095	**	0.776342	CMTM7_1	CMTM7	0.0373366
FP017430	7	205.893	30.5585	6.7377	0.001092	**	0.949098	BRF1_2	BRF1	0.0373366
FP011348	21	511.369	131.999	3.874	0.001112	**	0.674301	RANBP6_1	RANBP6	0.0377603
FP009332	39	368.301	103.42	3.5612	0.001116	**	0.672429	ETV1_1	ETV1	0.0377734
FP003198	26	192.4	50.9947	3.7729	0.001117	**	0.727546	MAT2A_3	MAT2A	0.0377734
FP010072	16	-3748.58	900.613	-4.1623	0.0011154	**	-0.755846	CPED1_4	CPED1	0.0377734
FP019780	21	3469.68	896.774	3.8691	0.001124	**	0.673828	CCL1_1	CCL1	0.0377785
FP012641	20	1496.56	382.738	3.9101	0.001127	**	0.688119	CHAT_1	CHAT	0.0377785
FP013755	20	20121	5147.09	3.9092	0.001129	**	0.688032	FSHB_2	FSHB	0.0377785
FP005299	18	123.829	30.8633	4.0122	0.001131	**	0.719477	SLC35G2_1	SLC35G2	0.0377785
FP025201	18	106.16	26.446	4.0142	0.001126	**	0.719654	IGSF1_1	IGSF1	0.0377785
FP007830	17	212.929	51.202	4.1586	0.001123	**	0.75556	ZNF354B_1	ZNF354B	0.0377785
FP021383	17	209.412	51.3593	4.0774	0.001131	**	0.73679	DENND1C_1	DENND1C	0.0377785
FP004041	15	62.2112	14.6293	4.2525	0.001122	**	0.775315	ZFAND2B_1	ZFAND2B	0.0377785
FP020485	13	203.622	46.6039	4.3692	0.001119	**	0.691096	KIF19_1	KIF19	0.0377785
FP012355	15	99.6917	23.4744	4.2468	0.001134	**	0.774902	PITRM1_1	PITRM1	0.0378092
FP021137	8	110.703	19.0327	5.8165	0.001135	**	0.92161	PQLC1_1	PQLC1	0.0378092
FP000572	21	111.6	28.585	3.9042	0.001141	**	0.687565	TMEM234_1	TMEM234	0.0379576
FP005464	38	203.781	57.2323	3.5606	0.001148	**	0.66287	C3orf80_1	C3orf80	0.0381388
FP000746	21	671.321	172.178	3.899	0.001154	**	0.687084	PPIH_1	PPIH	0.0381647
FP003240	20	1565.45	396.505	3.9481	0.001151	**	0.702477	FABP1_1	FABP1	0.0381647
FP000336	15	141.129	33.3053	4.2374	0.001153	**	0.774216	UBXN10_1	UBXN10	0.0381647
FP025424	11	128.901	27.553	4.6784	0.001155	**	0.871647	SLC10A3_1	SLC10A3	0.0381647
FP000082	12	151.508	33.7377	4.4908	0.00116	**	0.817625	FAM213B_1	FAM213B	0.0382784
FP009303	20	309.452	78.4674	3.9437	0.001162	**	0.702078	RSPH10B2_1	RSPH10B2	0.038293
FP005565	20	5115.22	1297.59	3.9421	0.001166	**	0.701932	KLHL24_2	KLHL24	0.0383219
FP011934	20	5358.28	1375.93	3.8943	0.001166	**	0.686647	DFNB31_2	DFNB31	0.0383219
FP013964	12	-5316.07	1185.08	-4.4858	0.0011684	**	-0.817328	GLYATL2_1	GLYATL2	0.0383494
FP000710	9	288.255	49.8495	5.7825	0.00117	**	0.920793	COL9A2_1	COL9A2	0.0383507
FP009282	14	303.723	67.7681	4.4818	0.001176	**	0.817084	FSCN1_1	FSCN1	0.038496
FP000995	27	179.568	48.5821	3.6962	0.001192	**	0.649745	ALG6_1	ALG6	0.0388778
FP006989	22	5845.12	1521.33	3.8421	0.001194	**	0.613333	NLN_2	NLN	0.0388778
FP006379	20	558.949	143.937	3.8833	0.001194	**	0.685619	RPL34_1	RPL34	0.0388778
FP009716	14	182.159	43.1883	4.2178	0.001194	**	0.739409	GNAI1_1	GNAI1	0.0388778
FP010637	16	2216.58	537.382	4.1248	0.001196	**	0.752905	EXTL3_1	EXTL3	0.0388914
FP001287	17	195.434	48.2781	4.0481	0.001198	**	0.734354	GSTM2_1	GSTM2	0.0389049
FP019653	19	1174.6	299.008	3.9283	0.0012	**	0.459621	SLC47A2_1	SLC47A2	0.0389184
FP010020	87	-5512.74	1639.76	-3.3619	0.0012076	**	-0.380765	DOCK4_4	DOCK4	0.0389341
FP004291	18	-608.511	150.444	-4.0448	0.001206	**	-0.734078	RAD18_1	RAD18	0.0389341
FP002769	16	898.533	218.059	4.1206	0.001206	**	0.752574	CENPA_1	CENPA	0.0389341
FP003546	16	254.986	61.9104	4.1186	0.00121	**	0.665315	KIF5C_1	KIF5C	0.0389341
FP001726	15	6988.59	1659.85	4.2104	0.001209	**	0.772224	PKLR_1	PKLR	0.0389341
FP011212	12	93.1723	20.0465	4.6478	0.001206	**	0.840181	TOP1MT_1	TOP1MT	0.0389341
FP005513	26	323.876	87.7953	3.689	0.001214	**	0.68207	PLD1_1	PLD1	0.0390117
FP014770	14	3049.67	724.829	4.2074	0.001216	**	0.772006	OR8D4_1	OR8D4	0.0390249
FP002445	16	254.383	61.8239	4.1146	0.001219	**	0.752103	ZNF678_1	ZNF678	0.0390701
FP006407	40	356.984	101.296	3.5242	0.001269	**	0.572098	ANK2_1	ANK2	0.0390724
FP017551	23	298.048	78.6236	3.7908	0.001235	**	0.417998	C15orf52_1	C15orf52	0.0390724
FP015827	22	5483.42	1432.23	3.8286	0.00123	**	0.669952	TMCC3_2	TMCC3	0.0390724
FP022244	21	1018.75	266.296	3.8256	0.001239	**	0.669667	ZNF576_2	ZNF576	0.0390724
FP023607	21	10392.7	2722.64	3.8171	0.001262	**	0.668845	TIAM1_2	TIAM1	0.0390724
FP013642	20	2704.72	698.949	3.8697	0.00123	**	0.684344	MICALCL_1	MICALCL	0.0390724
FP004161	19	228.536	58.3655	3.9156	0.001233	**	0.699527	ATG16L1_1	ATG16L1	0.0390724
FP008453	19	367.768	92.8675	3.9601	0.001257	**	0.216289	TREML2_1	TREML2	0.0390724
FP009598	18	316.23	79.813	3.9621	0.001252	**	0.715107	VOPP1_2	VOPP1	0.0390724
FP014181	18	2843.83	705.979	4.0282	0.001245	**	0.732686	PCNXL3_2	PCNXL3	0.0390724
FP019853	18	156.211	39.8925	3.9158	0.001232	**	0.699546	TBC1D3F_3	TBC1D3F	0.0390724
FP019940	18	366.797	91.0692	4.0277	0.001247	**	0.732642	KRT26_1	KRT26	0.0390724
FP004762	17	-3992.46	993.134	-4.0201	0.0012653	**	-0.732	IQCF1_1	IQCF1	0.0390724
FP010721	17	281.942	68.8838	4.093	0.00127	**	0.750377	SFRP1_1	SFRP1	0.0390724
FP012797	17	1048.58	260.217	4.0296	0.001242	**	0.732807	P4HA1_2	P4HA1	0.0390724
FP013001	17	413.827	100.881	4.1021	0.001248	**	0.751106	PIK3AP1_2	PIK3AP1	0.0390724
FP020228	17	289.185	70.5945	4.0964	0.001262	**	0.75065	SPOP_2	SPOP	0.0390724
FP020346	17	6125.7	1523.43	4.021	0.001263	**	0.732078	USP32_2	USP32	0.0390724
FP023363	17	-2683.87	654.493	-4.1007	0.001252	**	-0.750991	CSE1L_1	CSE1L	0.0390724
FP001217	16	157.388	37.5839	4.1876	0.001259	**	0.770534	HIAT1_1	HIAT1	0.0390724
FP002251	16	356.773	87.0213	4.0998	0.001254	**	0.750923	RBBP5_2	RBBP5	0.0390724
FP009630	16	67.1405	16.3305	4.1114	0.001227	**	0.751842	SBDS_1	SBDS	0.0390724
FP015291	16	307.345	74.886	4.1042	0.001243	**	0.75127	RAPGEF3_5	RAPGEF3	0.0390724
FP017330	16	628.153	153.183	4.1007	0.001252	**	0.750991	GSKIP_1	GSKIP	0.0390724
FP022503	16	10787.7	2623.39	4.1121	0.001225	**	0.751901	CPT1C_2	CPT1C	0.0390724
FP009164	15	127.327	29.655	4.2936	0.001269	**	0.791389	SLC22A3_1	SLC22A3	0.0390724
FP000086	14	-3833.26	892.76	-4.2937	0.0012692	**	-0.791396	ACTRT2_1	ACTRT2	0.0390724
FP013792	14	200.524	46.4944	4.3129	0.001229	**	0.79271	FBXO3_2	FBXO3	0.0390724
FP025336	14	183.382	42.6914	4.2955	0.001265	**	0.791521	MAGEA4_1	MAGEA4	0.0390724
FP019014	13	189.042	40.9092	4.621	0.001253	**	0.838746	SLC7A6_1	SLC7A6	0.0390724
FP009200	12	462.957	104.026	4.4504	0.001234	**	0.815167	WDR27_1	WDR27	0.0390724
FP008191	6	524.223	64.2136	8.1637	0.001226	**	0.961619	GTF2H4_2	GTF2H4	0.0390724
FP006822	18	176.671	43.9819	4.0169	0.001273	**	0.731733	SLC45A2_1	SLC45A2	0.0391157
FP022194	23	226.988	60.142	3.7742	0.001283	**	0.654582	RPS19_2	RPS19	0.0391719
FP009555	21	1287.71	337.969	3.8101	0.001282	**	0.668167	MYO1G_1	MYO1G	0.0391719
FP015497	19	9705.78	2490.45	3.8972	0.001281	**	0.697843	SMUG1_1	SMUG1	0.0391719
FP010785	18	356.49	88.8621	4.0117	0.001286	**	0.731293	TMEM68_2	TMEM68	0.0391719
FP002633	17	2086.62	519.791	4.0143	0.00128	**	0.731517	RSAD2_1	RSAD2	0.0391719
FP018177	17	383.633	95.6247	4.0119	0.001286	**	0.731306	SPATA8_1	SPATA8	0.0391719
FP022256	12	16516.9	3733.14	4.4244	0.001285	**	0.813561	ZNF404_1	ZNF404	0.0391719
FP021435	17	602.736	150.28	4.0108	0.001289	**	0.731213	TIMM44_1	TIMM44	0.0392147
FP011598	19	132.768	34.1073	3.8927	0.001294	**	0.697426	SMC5_1	SMC5	0.0392332
FP003263	16	3664.73	878.448	4.1718	0.001295	**	0.769346	STARD7_2	STARD7	0.0392332
FP024115	16	129.626	31.7448	4.0834	0.001293	**	0.749603	FOXRED2_2	FOXRED2	0.0392332
FP005806	15	127.715	30.6171	4.1714	0.001296	**	0.769312	GRK4_1	GRK4	0.0392332
FP016395	22	238.758	63.3708	3.7676	0.001302	**	0.653932	ENOX1_2	ENOX1	0.0392997
FP021011	22	3118.6	827.784	3.7674	0.001303	**	0.653909	STARD6_1	STARD6	0.0392997
FP007803	17	340.981	85.1121	4.0063	0.0013	**	0.73083	SLC34A1_1	SLC34A1	0.0392997
FP013688	20	80.8482	20.7913	3.8886	0.001305	**	0.697048	SERGEF_1	SERGEF	0.0393117
FP015155	18	-1393.84	348.185	-4.0032	0.0013079	**	-0.730567	GOLT1B_1	GOLT1B	0.0393508
FP024580	17	297.493	74.3519	4.0012	0.001313	**	0.730395	DCAF8L1_1	DCAF8L1	0.0393595
FP012293	16	85.0748	20.8758	4.0753	0.001313	**	0.748951	DPP7_1	DPP7	0.0393595
FP021933	13	219.09	49.6585	4.4119	0.00131	**	0.812783	ZNF30_1	ZNF30	0.0393595
FP011985	18	260.988	66.3013	3.9364	0.00132	**	0.712825	PTGS1_3	PTGS1	0.0395211
FP001248	20	408.667	106.637	3.8323	0.001334	**	0.680807	NBPF4_1	NBPF4	0.0396982
FP023897	20	3271.92	853.604	3.8331	0.001332	**	0.680877	AIFM3_2	AIFM3	0.0396982
FP003102	16	155.568	37.4306	4.1562	0.001332	**	0.768164	ZNF638_2	ZNF638	0.0396982
FP022071	16	505.382	126.566	3.993	0.001334	**	0.729702	LGALS7_1	LGALS7	0.0396982
FP004249	11	203.419	42.2696	4.8124	0.001334	**	0.687467	SEPT2_2	42980	0.0396982
FP015247	17	-4518.27	1132.48	-3.9897	0.001343	**	-0.729419	C12orf40_1	C12orf40	0.0399177
FP013016	24	120.6	32.4074	3.7214	0.001348	**	0.639637	EXOSC1_1	EXOSC1	0.0399695
FP002404	17	200.614	49.3961	4.0613	0.001347	**	0.747823	CAPN2_2	CAPN2	0.0399695
FP014682	18	1050.29	267.582	3.9251	0.00135	**	0.646374	FXYD6_1	FXYD6	0.0399805
FP005789	17	135.806	34.085	3.9844	0.001357	**	0.72896	RNF4_2	RNF4	0.0401394
FP014776	15	97.0683	23.9386	4.0549	0.001364	**	0.7473	SPA17_1	SPA17	0.0402979
FP013924	11	362.619	79.5547	4.5581	0.00137	**	0.835312	FOLH1_1	FOLH1	0.0404265
FP013432	17	375.642	94.4259	3.9782	0.001374	**	0.728429	TSPAN4_4	TSPAN4	0.0404959
FP002624	18	132.172	33.7778	3.913	0.001384	**	0.710731	RNASEH1_1	RNASEH1	0.0407417
FP004677	18	294.528	74.2358	3.9675	0.001403	**	0.727507	P4HTM_1	P4HTM	0.0412516
FP019692	21	276.292	73.319	3.7684	0.001407	**	0.66408	SARM1_2	SARM1	0.0412703
FP019221	16	296.331	73.3805	4.0383	0.001407	**	0.745943	SLC22A31_1	SLC22A31	0.0412703
FP008176	16	87.196	21.597	4.0374	0.001409	**	0.745873	NRM_1	NRM	0.0412797
FP003784	20	708.537	183.991	3.8509	0.001413	**	0.693557	ZSWIM2_1	ZSWIM2	0.0413475
FP009400	22	965.5	258.856	3.7299	0.00142	**	0.701754	SNX10_3	SNX10	0.0414043
FP006611	17	471.479	119.021	3.9613	0.00142	**	0.726976	TKTL2_1	TKTL2	0.0414043
FP000061	8	97.9037	17.5788	5.5694	0.00142	**	0.915379	NADK_3	NADK	0.0414043
FP019691	14	140.505	32.2319	4.3592	0.001423	**	0.448856	SARM1_1	SARM1	0.0414117
FP001222	6	444.72	56.7021	7.8431	0.001427	**	0.950666	RTCA_1	RTCA	0.0414117
FP007062	6	11901.1	1517.4	7.8431	0.001427	**	0.950666	FAM169A_1	FAM169A	0.0414117
FP022884	6	739.903	94.3382	7.8431	0.001427	**	0.950666	NSFL1C_1	NSFL1C	0.0414117
FP025265	95	1173.12	355.817	3.297	0.001434	**	0.252591	ARHGEF6_1	ARHGEF6	0.0414536
FP016657	20	320.87	84.4704	3.7986	0.0014352	**	0.677574	UPF3A_2	UPF3A	0.0414536
FP018801	20	1367.43	355.702	3.8443	0.001432	**	0.692936	ADCY7_2	ADCY7	0.0414536
FP008725	14	114.796	27.8897	4.1161	0.001431	**	0.765101	NT5E_1	NT5E	0.0414536
FP016714	33	143.853	40.8454	3.5219	0.001439	**	0.640126	RAB2B_2	RAB2B	0.0414658
FP018097	17	175.839	44.4598	3.955	0.001438	**	0.72643	PDE8A_1	PDE8A	0.0414658
FP002889	17	609.457	154.142	3.9539	0.001441	**	0.72633	MORN2_1	MORN2	0.0414748
FP013157	19	-696.808	181.455	-3.8401	0.0014451	**	-0.692543	ITPRIP_2	ITPRIP	0.0414955
FP022248	18	345.71	87.459	3.9528	0.001444	**	0.726238	PLAUR_1	PLAUR	0.0414955
FP002337	21	15672.2	4130.3	3.7945	0.001448	**	0.677172	PPP2R5A_2	PPP2R5A	0.0415302
FP010397	13	3000.35	690.412	4.3457	0.001453	**	0.808582	ESYT2_4	ESYT2	0.041625
FP025298	40	380.564	109.88	3.4634	0.00146	**	0.623678	SLITRK4_1	SLITRK4	0.0417281
FP005682	14	156.306	37.1225	4.2106	0.001459	**	0.785563	XXYLT1_1	XXYLT1	0.0417281
FP020600	16	1299.94	323.642	4.0166	0.001466	**	0.744158	SEPT9_10	42987	0.0418023
FP019236	15	2230.93	543.751	4.1028	0.001465	**	0.764079	VPS9D1_2	VPS9D1	0.0418023
FP016575	26	430.263	118.445	3.6326	0.001471	**	0.711765	ZIC5_1	ZIC5	0.0418962
FP009045	17	-849.646	211.74	-4.0127	0.0014764	**	-0.743834	SF3B5_1	SF3B5	0.0419011
FP014214	16	129.494	31.5985	4.0981	0.001477	**	0.76371	KLC2_2	KLC2	0.0419011
FP016861	16	139.269	34.711	4.0122	0.001478	**	0.743797	FAM177A1_1	FAM177A1	0.0419011
FP018261	16	160.23	39.9352	4.0122	0.001478	**	0.743798	GNG13_1	GNG13	0.0419011
FP012912	31	115.753	32.7291	3.5367	0.001486	**	0.678329	PTEN_1	PTEN	0.0419342
FP013846	17	89.3944	22.6965	3.9387	0.001484	**	0.725008	KAI1_1	KAI1	0.0419342
FP004342	15	509.111	124.332	4.0948	0.001486	**	0.763452	TAMM41_1	TAMM41	0.0419342
FP023057	15	137.167	33.495	4.0952	0.001485	**	0.763483	GZF1_1	GZF1	0.0419342
FP012412	17	275.495	69.9964	3.9358	0.001493	**	0.72476	MCM10_1	MCM10	0.0420834
FP007439	20	165.776	43.8759	3.7783	0.0015	**	0.675607	EIF4EBP3_1	EIF4EBP3	0.0422322
FP006208	17	-273.175	69.4936	-3.9309	0.001507	**	-0.724331	PRKG2_3	PRKG2	0.0423119
FP017802	14	133.58	32.679	4.0876	0.001505	**	0.762896	TPM1_2	TPM1	0.0423119
FP022641	12	260.709	60.3185	4.3222	0.001508	**	0.807059	ZNF331_3	ZNF331	0.0423119
FP020958	15	151.457	37.0795	4.0847	0.001513	**	0.762664	PSTPIP2_1	PSTPIP2	0.0424037
FP020395	18	-3292.77	851.245	-3.8682	0.0015166	**	-0.706668	CSH2_1	CSH2	0.0424562
FP019264	13	-327.287	75.8277	-4.3162	0.0015222	**	-0.806667	VPS53_1	VPS53	0.0425644
FP004255	12	150.417	34.8803	4.3124	0.001531	**	0.84974	THAP4_1	THAP4	0.0427618
FP014729	36	129.712	37.4497	3.4636	0.001536	**	0.538026	ABCG4_2	ABCG4	0.0427698
FP007120	19	1217.29	319.361	3.8117	0.001535	**	0.689858	TMEM167A_1	TMEM167A	0.0427698
FP019371	19	271.085	70.2119	3.861	0.001539	**	0.706006	GP1BA_1	GP1BA	0.0427698
FP024699	19	2331.57	611.952	3.8101	0.00154	**	0.689706	PQBP1_2	PQBP1	0.0427698
FP013555	16	150.869	37.8075	3.9904	0.00154	**	0.741985	ILK_2	ILK	0.0427698
FP021324	12	163.412	36.5118	4.4756	0.001542	**	0.830654	MPND_1	MPND	0.042777
FP021019	59	214.112	64.1439	3.338	0.001549	**	0.309618	TCF4_11	TCF4	0.0428743
FP015757	17	150.004	38.2931	3.9173	0.001548	**	0.72313	CSRP2_1	CSRP2	0.0428743
FP005027	24	236.444	65.0797	3.6331	0.001556	**	0.611144	DZIP3_1	DZIP3	0.0428886
FP014889	19	65.5178	16.9948	3.8552	0.001557	**	0.705476	CACNA1C_1	CACNA1C	0.0428886
FP000277	18	5488.81	1423.68	3.8554	0.001557	**	0.705493	SZRD1_1	SZRD1	0.0428886
FP005220	17	552.522	141.187	3.9134	0.00156	**	0.806674	ACAD9_1	ACAD9	0.0428886
FP002038	16	-441.938	110.886	-3.9855	0.0015539	**	-0.741571	KIAA0040_1	KIAA0040	0.0428886
FP014938	16	289.423	72.6568	3.9834	0.00156	**	0.741398	VAMP1_1	VAMP1	0.0428886
FP020743	9	152.489	27.9015	5.4653	0.001565	**	0.866916	COLEC12_1	COLEC12	0.042978
FP009323	17	239.9	60.2652	3.9807	0.001568	**	0.741171	SCIN_2	SCIN	0.0430123
FP018341	16	376.996	94.725	3.9799	0.00157	**	0.741103	RNPS1_1	RNPS1	0.0430191
FP010232	20	225.578	60.0585	3.756	0.001574	**	0.803856	MRPS33_1	MRPS33	0.0430326
FP015261	20	139.672	36.2755	3.8503	0.001573	**	0.718579	PRICKLE1_2	PRICKLE1	0.0430326
FP017817	31	335.959	95.293	3.5255	0.00159	**	0.703836	KIAA0101_1	KIAA0101	0.0431815
FP024688	27	280.05	78.238	3.5795	0.001588	**	0.445011	WDR13_2	WDR13	0.0431815
FP004420	18	830.927	212.77	3.9053	0.001585	**	0.722072	UBE2E1_2	UBE2E1	0.0431815
FP022799	18	150.488	39.1238	3.8464	0.001585	**	0.704673	ZNF550_1	ZNF550	0.0431815
FP013303	17	259.778	66.5027	3.9063	0.001582	**	0.72216	CTBP2_4	CTBP2	0.0431815
FP015370	16	280.323	69.0934	4.0572	0.00159	**	0.760502	FAM186A_1	FAM186A	0.0431815
FP008983	21	46313.8	12474.7	3.7126	0.001593	**	0.658536	ALDH8A1_1	ALDH8A1	0.0431946
FP013280	12	733.516	164.729	4.4529	0.001594	**	0.829339	HTRA1_1	HTRA1	0.0431946
FP005626	20	-11339	3025.12	-3.7483	0.001601	**	-0.672674	FETUB_3	FETUB	0.0433158
FP006447	17	331.803	83.5923	3.9693	0.001602	**	0.74021	KIAA1109_1	KIAA1109	0.0433158
FP021657	20	711.086	187.602	3.7904	0.001605	**	0.687832	PKN1_1	PKN1	0.0433285
FP007895	15	4969.24	1252.28	3.9682	0.001606	**	0.740114	GMDS_2	GMDS	0.0433285
FP015669	19	5364.8	1415.68	3.7895	0.001608	**	0.742962	MON2_3	MON2	0.0433348
FP024559	104	596.321	183.607	3.2478	0.001618	**	0.230203	PHEX_1	PHEX	0.0435565
FP012405	16	257.172	64.9003	3.9626	0.001623	**	0.739642	DHTKD1_1	DHTKD1	0.0435955
FP018456	14	211.466	50.9817	4.1479	0.001622	**	0.781023	CARHSP1_1	CARHSP1	0.0435955
FP003945	16	722.098	182.315	3.9607	0.001628	**	0.739486	PLEKHM3_1	PLEKHM3	0.0436135
FP011929	14	330.377	79.6824	4.1462	0.001627	**	0.780898	AKNA_4	AKNA	0.0436135
FP010881	6	14161.5	1869.8	7.5738	0.001629	**	0.918758	RP11-758M4.1_1	RP11-758M4.1	0.0436135
FP012906	21	6999.13	1891.22	3.7008	0.001636	**	0.657351	MINPP1_2	MINPP1	0.0437532
FP001469	26	6791.75	1904.89	3.5654	0.001643	**	0.59937	BCL9_2	BCL9	0.0438926
FP014360	15	117.102	29.0042	4.0374	0.001647	**	0.758934	P2RY6_1	P2RY6	0.0439516
FP001289	16	326.086	82.4991	3.9526	0.001653	**	0.738798	GSTM5_1	GSTM5	0.0440161
FP015383	15	268.389	64.875	4.137	0.001652	**	0.780224	CSRNP2_1	CSRNP2	0.0440161
FP012419	20	-1738.44	465.896	-3.7314	0.0016607	**	-0.671009	BEND7_1	BEND7	0.0440301
FP011119	18	132.797	34.7278	3.824	0.00166	**	0.636583	ZHX1-C8ORF76_1	ZHX1-C8ORF76	0.0440301
FP005100	15	126.194	31.2782	4.0346	0.001656	**	0.758707	B4GALT4_1	B4GALT4	0.0440301
FP021473	15	-920.581	228.24	-4.0334	0.001659	**	-0.758615	ZNF561_1	ZNF561	0.0440301
FP020914	85	-8318.2	2550.18	-3.2618	0.0016673	**	-0.0792617	DTNA_3	DTNA	0.0441098
FP010562	16	258.172	65.3848	3.9485	0.001666	**	0.738449	PDLIM2_1	PDLIM2	0.0441098
FP024733	18	406.423	106.368	3.8209	0.00167	**	0.702304	GAGE12H_1	GAGE12H	0.0441337
FP004355	18	183.045	47.2102	3.8772	0.001675	**	0.719576	CAND2_1	CAND2	0.0442182
FP019195	7	300.69	40.0163	7.5142	0.001679	**	0.966356	BANP_1	BANP	0.0442762
FP000609	18	167.764	43.2872	3.8756	0.001681	**	0.71943	PHC2_1	PHC2	0.0442814
FP015677	31	257.125	73.778	3.4851	0.001697	**	0.528833	SRGAP1_1	SRGAP1	0.044538
FP018361	19	234.931	62.411	3.7643	0.001696	**	0.685322	PRSS22_1	PRSS22	0.044538
FP022785	19	2789.82	741.243	3.7637	0.001698	**	0.685268	ZNF460_1	ZNF460	0.044538
FP010923	12	266.96	60.5416	4.4095	0.001697	**	0.826794	CA13_1	CA13	0.044538
FP007286	35	174.397	50.4409	3.4575	0.001704	**	0.63494	MEGF10_1	MEGF10	0.0445788
FP025430	20	233.687	62.8176	3.7201	0.001702	**	0.660808	IKBKG_3	IKBKG	0.0445788
FP010901	19	149.349	39.7027	3.7617	0.001705	**	0.685074	TPD52_1	TPD52	0.0445788
FP002712	10	21778.5	4425.71	4.9209	0.001712	**	0.880767	PUM2_2	PUM2	0.0447142
FP006320	17	3580.45	940.47	3.8071	0.001718	**	0.597062	ADH1C_1	ADH1C	0.0448232
FP013577	18	153.245	39.6772	3.8623	0.001725	**	0.718234	NLRP10_1	NLRP10	0.044958
FP006773	20	222.957	60.0697	3.7116	0.001733	**	0.669049	CCT5_2	CCT5	0.0450709
FP001904	15	-1107.69	276.253	-4.0097	0.0017313	**	-0.756711	FCGR3A_1	FCGR3A	0.0450709
FP019118	18	391.899	103.075	3.8021	0.001736	**	0.700544	TMEM231_1	TMEM231	0.0451011
FP000770	20	141.479	38.1386	3.7096	0.001741	**	0.668846	CDC20_1	CDC20	0.0451355
FP008184	14	360.192	87.7109	4.1066	0.00174	**	0.777963	DDR1_2	DDR1	0.0451355
FP025080	63	116.553	35.513	3.282	0.001749	**	0.683576	CHRDL1_2	CHRDL1	0.045295
FP010193	32	418.072	120.888	3.4584	0.001756	**	0.527848	PTN_1	PTN	0.0454284
FP003147	21	126.998	34.6314	3.6671	0.001763	**	0.65393	LBX2_1	LBX2	0.0454953
FP015694	17	354.704	90.5411	3.9176	0.001766	**	0.735804	IRAK3_1	IRAK3	0.0454953
FP016012	16	2641.96	674.201	3.9187	0.001763	**	0.735895	NAA25_1	NAA25	0.0454953
FP016438	16	3239.1	826.721	3.918	0.001765	**	0.73584	LPAR6_1	LPAR6	0.0454953
FP014646	51	106.171	31.9188	3.3263	0.001783	**	0.63532	ZBTB16_2	ZBTB16	0.0455801
FP013216	26	401.094	112.174	3.5757	0.001783	**	0.792811	ABLIM1_3	ABLIM1	0.0455801
FP021487	20	154.238	41.7024	3.6985	0.001783	**	0.667743	P2RY11_1	P2RY11	0.0455801
FP003389	18	196.224	51.7943	3.7885	0.001785	**	0.699271	ANAPC1_1	ANAPC1	0.0455801
FP003970	18	-5053.72	1313.41	-3.8478	0.0017753	**	-0.716924	CPS1_2	CPS1	0.0455801
FP019786	18	1195.53	310.909	3.8453	0.001784	**	0.716698	RFFL_5	RFFL	0.0455801
FP009108	17	338.955	88.1232	3.8464	0.00178	**	0.716798	SYNE1_2	SYNE1	0.0455801
FP015596	16	274.504	68.7343	3.9937	0.001782	**	0.755418	NACA_2	NACA	0.0455801
FP019674	16	1692.63	432.694	3.9118	0.001786	**	0.735308	KCNJ12_2	KCNJ12	0.0455801
FP017669	21	385.463	104.254	3.6973	0.001788	**	0.667622	SHF_1	SHF	0.0455838
FP007238	32	154.218	44.6968	3.4503	0.001793	**	0.699728	AP3S1_1	AP3S1	0.045642
FP004881	15	1426.45	357.529	3.9898	0.001794	**	0.755098	SYNPR_1	SYNPR	0.045642
FP015109	21	337.511	91.3402	3.6951	0.001797	**	0.667397	H2AFJ_1	H2AFJ	0.045671
FP001626	18	3376.81	892.488	3.7836	0.001803	**	0.698803	S100A9_1	S100A9	0.0457761
FP013378	11	204.554	44.6934	4.5768	0.00181	**	0.789341	RIC_1	RIC	0.0459063
FP008104	17	522.906	136.276	3.8371	0.001813	**	0.715955	HIST1H4K_1	HIST1H4K	0.0459349
FP009673	14	170.577	41.804	4.0804	0.001819	**	0.775993	GTF2IRD2_1	GTF2IRD2	0.0459447
FP009676	14	170.577	41.804	4.0804	0.001819	**	0.775993	GTF2IRD2B_1	GTF2IRD2B	0.0459447
FP015475	11	771.5	168.693	4.5734	0.001818	**	0.850492	PCBP2_1	PCBP2	0.0459447
FP004352	17	377.797	96.8602	3.9004	0.001825	**	0.73432	RAF1_1	RAF1	0.0459828
FP016305	17	6178.31	1584.37	3.8995	0.001828	**	0.734243	FLT1_2	FLT1	0.0459828
FP004204	15	273.373	68.6978	3.9793	0.001828	**	0.759818	ESPNL_3	ESPNL	0.0459828
FP023010	14	376.872	89.7064	4.2012	0.001825	**	0.798959	BFSP1_3	BFSP1	0.0459828
FP014525	26	349.99	98.8221	3.5416	0.001832	**	0.678948	FAM76B_1	FAM76B	0.0460363
FP016350	15	1115.63	286.461	3.8945	0.001845	**	0.733809	SPG20_2	SPG20	0.0463155
FP020411	17	79.0041	20.6459	3.8266	0.001851	**	0.715001	DDX5_1	DDX5	0.0464187
FP020544	26	601.402	170.041	3.5368	0.001853	**	0.701021	RECQL5_1	RECQL5	0.0464214
FP013752	24	989.959	278.377	3.5562	0.001867	**	0.665584	METTL15_1	METTL15	0.0464928
FP003865	21	141.345	38.4262	3.6784	0.001863	**	0.454784	BZW1_2	BZW1	0.0464928
FP016489	19	271.613	73.0318	3.7191	0.001866	**	0.680925	PCDH20_1	PCDH20	0.0464928
FP023340	19	786.162	211.275	3.721	0.001858	**	0.511435	ZNF334_1	ZNF334	0.0464928
FP015899	18	216.475	56.6503	3.8212	0.001871	**	0.714508	GLT8D2_1	GLT8D2	0.0464928
FP011466	17	3672.93	961.145	3.8214	0.00187	**	0.714524	UBAP2_3	UBAP2	0.0464928
FP019819	14	2267.74	571.731	3.9665	0.001871	**	0.753193	CCL14_1	CCL14	0.0464928
FP005769	9	178.074	33.7114	5.2823	0.001861	**	0.907207	TMEM129_1	TMEM129	0.0464928
FP020243	19	-692.975	186.471	-3.7163	0.0018768	**	-0.680647	SAMD14_2	SAMD14	0.0465898
FP003446	23	184.914	50.82	3.6386	0.001879	**	0.681826	CLASP1_1	CLASP1	0.0465973
FP014936	21	201.549	55.4409	3.6354	0.001892	**	0.650671	LTBR_2	LTBR	0.0468251
FP022346	15	2138.24	539.924	3.9603	0.001892	**	0.752683	IGFL2_1	IGFL2	0.0468251
FP002871	16	182.025	46.9156	3.8799	0.001897	**	0.732527	AC007390.5_1	AC007390.5	0.0468342
FP006444	16	294.998	76.0478	3.8791	0.0019	**	0.732462	BBS7_1	BBS7	0.0468342
FP021536	12	359.072	79.0959	4.5397	0.0019	**	0.848744	KANK2_2	KANK2	0.0468342
FP010857	11	219.276	45.3942	4.8305	0.001898	**	0.877059	TRAM1_1	TRAM1	0.0468342
FP013194	46	188.955	56.8641	3.3229	0.001912	**	0.543232	TCF7L2_6	TCF7L2	0.0468478
FP023008	27	2414.97	689.251	3.5038	0.00191	**	0.651849	OTOR_1	OTOR	0.0468478
FP005791	20	5364.18	1462.55	3.6677	0.001907	**	0.00125427	FAM193A_2	FAM193A	0.0468478
FP014919	17	6638.44	1767.65	3.7555	0.001909	**	0.696137	NDUFA9_1	NDUFA9	0.0468478
FP005264	14	424.592	104.811	4.051	0.001912	**	0.773758	ACPP_1	ACPP	0.0468478
FP009275	12	6838.76	1506.85	4.5384	0.001903	**	0.848679	RBAK_2	RBAK	0.0468478
FP013299	17	118.164	31.0627	3.8041	0.001935	**	0.71293	FAM53B_1	FAM53B	0.0473641
FP008931	17	84.2477	22.1557	3.8025	0.001941	**	0.71279	ECHDC1_1	ECHDC1	0.0474636
FP016523	17	-5908.48	1554.33	-3.8013	0.001946	**	-0.640272	EDNRB_1	EDNRB	0.0475386
FP013576	22	3536.8	977.175	3.6194	0.001961	**	0.649018	OR10A6_1	OR10A6	0.0475979
FP016896	21	263.48	72.7555	3.6214	0.001952	**	0.649229	KLHL28_2	KLHL28	0.0475979
FP005540	20	17340	4742.03	3.6567	0.001953	**	0.663521	MFN1_3	MFN1	0.0475979
FP006375	16	-7717.57	1997.6	-3.8634	0.0019571	**	-0.731085	HADH_1	HADH	0.0475979
FP012562	16	1792.77	471.97	3.7985	0.001957	**	0.712415	CCNY_1	CCNY	0.0475979
FP015377	15	287.503	72.9635	3.9404	0.001962	**	0.751038	METTL7A_1	METTL7A	0.0475979
FP020635	12	172.212	39.9467	4.3111	0.001959	**	0.820816	ENGASE_1	ENGASE	0.0475979
FP010574	16	128.975	33.4062	3.8608	0.001967	**	0.730854	TNFRSF10B_1	TNFRSF10B	0.0476721
FP019169	6	241.361	33.5229	7.1999	0.001972	**	0.955144	ZDHHC7_1	ZDHHC7	0.0477461
FP023499	17	2487.49	655.82	3.7929	0.001978	**	0.711904	COL20A1_1	COL20A1	0.0477971
FP002695	16	332.266	86.127	3.8578	0.001978	**	0.730592	GEN1_1	GEN1	0.0477971
FP018863	21	8472.22	2346.08	3.6112	0.001997	**	0.648168	NLRC5_2	NLRC5	0.047997
FP000278	18	452.734	121.237	3.7343	0.001994	**	0.642089	SPATA21_1	SPATA21	0.047997
FP022141	17	223.724	58.0504	3.854	0.001993	**	0.73025	SHKBP1_1	SHKBP1	0.047997
FP015237	16	123.614	32.6214	3.7894	0.001992	**	0.711572	PKP2_1	PKP2	0.047997
FP025121	16	8359.12	2169.31	3.8534	0.001995	**	0.730197	CXorf56_1	CXorf56	0.047997
FP018331	13	196.796	48.8913	4.0252	0.001998	**	0.771763	MLST8_1	MLST8	0.047997
FP022883	17	941.276	244.376	3.8518	0.002001	**	0.730054	SDCBP2_1	SDCBP2	0.0479991
FP014225	12	359.228	83.617	4.2961	0.002002	**	0.819886	SLC29A2_1	SLC29A2	0.0479991
FP003212	16	-13773.6	3576.87	-3.8507	0.002005	**	-0.729966	ST3GAL5_2	ST3GAL5	0.0480242
FP004520	43	212.77	63.8757	3.331	0.002009	**	0.314128	CSRNP1_1	CSRNP1	0.0480731
FP012516	22	159.922	44.7391	3.5745	0.002022	**	0.475499	MPP7_1	MPP7	0.04829
FP017229	18	280.244	74.1009	3.7819	0.002022	**	0.710882	GALC_1	GALC	0.04829
FP013762	22	598.68	167.5	3.5742	0.002024	**	0.634071	ELP4_1	ELP4	0.0482908
FP018412	16	196.609	51.141	3.8445	0.002029	**	0.729408	DNAJA3_1	DNAJA3	0.0483631
FP007877	18	1204.24	323.501	3.7225	0.002043	**	0.692963	BTNL8_1	BTNL8	0.0484859
FP024732	18	393.414	105.671	3.723	0.002041	**	0.693012	GAGE12F_1	GAGE12F	0.0484859
FP012559	16	1023.79	261.364	3.9171	0.002046	**	0.749093	CREM_5	CREM	0.0484859
FP003605	15	78.215	19.9581	3.919	0.002039	**	0.74925	CD302_1	CD302	0.0484859
FP016228	12	620.567	144.869	4.2836	0.002039	**	0.819101	TUBA3C_1	TUBA3C	0.0484859
FP016580	9	161.089	31.0719	5.1844	0.002046	**	0.904161	TMTC4_1	TMTC4	0.0484859
FP009544	16	252.215	65.7037	3.8387	0.002051	**	0.728893	TMED4_1	TMED4	0.0485575
FP012156	13	139.402	33.7782	4.127	0.002054	**	0.793767	LAMC3_1	LAMC3	0.0485817
FP025390	15	204.14	52.1708	3.9129	0.002061	**	0.428647	L1CAM_2	L1CAM	0.0487003
FP018917	20	264.924	72.9542	3.6314	0.002063	**	0.660941	CDH5_2	CDH5	0.0487007
FP017121	45	254.869	77.2105	3.301	0.002067	**	0.544727	ZFYVE1_1	ZFYVE1	0.0487015
FP001296	22	6488.15	1819.87	3.5652	0.002066	**	0.714765	AHCYL1_3	AHCYL1	0.0487015
FP006573	20	287.775	79.2738	3.6301	0.002069	**	0.660814	PLRG1_1	PLRG1	0.0487018
FP017925	19	11824.5	3183.36	3.7145	0.002077	**	0.643495	TMEM202_1	TMEM202	0.0487499
FP022130	17	1852.32	483.37	3.8321	0.002077	**	0.728308	PLD3_1	PLD3	0.0487499
FP009051	15	307.495	78.6579	3.9093	0.002075	**	0.748435	EPM2A_1	EPM2A	0.0487499
FP007164	22	117.156	32.6075	3.5929	0.00208	**	0.646254	CAST_1	CAST	0.0487737
FP025070	22	187.382	52.1937	3.5901	0.002093	**	0.645964	NXT2_2	NXT2	0.048985
FP009092	14	562.107	140.585	3.9983	0.002092	**	0.769671	MTHFD1L_1	MTHFD1L	0.048985
FP007894	19	81.1315	22.148	3.6632	0.0021	**	0.675373	FOXC1_1	FOXC1	0.049102
FP011457	16	121.748	31.2003	3.9021	0.002102	**	0.747834	NFX1_1	NFX1	0.049102
FP004595	20	251.048	68.5545	3.662	0.002105	**	0.675259	SLC6A20_1	SLC6A20	0.0491253
FP021800	25	198.699	56.6912	3.5049	0.002108	**	0.607517	CRTC1_2	CRTC1	0.0491486
FP024091	21	2047.1	570.847	3.5861	0.002112	**	0.645539	LARGE_3	LARGE	0.0491952
FP000878	54	371.582	114.384	3.2485	0.002121	**	0.568351	ELAVL4_3	ELAVL4	0.049218
FP001861	20	2496.95	689.92	3.6192	0.002119	**	0.327407	DCAF8_1	DCAF8	0.049218
FP023840	20	156.159	42.675	3.6593	0.002117	**	0.674983	BCL2L13_2	BCL2L13	0.049218
FP006647	16	276.196	70.8667	3.8974	0.00212	**	0.747433	HMGB2_2	HMGB2	0.049218
FP020132	59	167.505	51.8548	3.2303	0.002127	**	0.527912	NMT1_1	NMT1	0.0492641
FP022686	18	341.288	92.166	3.703	0.002126	**	0.691065	KIR3DX1_1	KIR3DX1	0.0492641
FP020397	17	-2756.52	733.99	-3.7555	0.00213	**	-0.708415	CSH1_1	CSH1	0.0492871
FP001451	20	-198.233	54.2377	-3.6549	0.0021365	**	-0.674543	PIAS3_1	PIAS3	0.0492981
FP019803	17	11306.7	3011.32	3.7547	0.002133	**	0.708338	SLFN12L_1	SLFN12L	0.0492981
FP005289	13	504.68	126.603	3.9863	0.002136	**	0.723513	CEP63_2	CEP63	0.0492981
FP019659	16	816.027	209.64	3.8925	0.002139	**	0.74702	AKAP10_1	AKAP10	0.0493095
FP002535	22	1504.77	420.624	3.5775	0.002152	**	0.644634	HEATR1_2	HEATR1	0.0495626
FP000832	17	194.631	51.9147	3.749	0.002157	**	0.707804	IPP_1	IPP	0.0496297
FP005881	15	75.9738	18.5533	4.0949	0.002162	**	0.791469	CPEB2_1	CPEB2	0.0496297
FP007846	15	697.207	179.403	3.8863	0.002163	**	0.746488	CANX_1	CANX	0.0496297
FP019048	15	109.714	27.5657	3.9801	0.002159	**	0.768231	EXOSC6_1	EXOSC6	0.0496297
FP011540	16	67.0695	17.6034	3.81	0.002166	**	0.72633	MELK_1	MELK	0.0496522
FP012866	20	1082.43	300.02	3.6079	0.002172	**	0.65852	ANXA11_2	ANXA11	0.0497433
FP022146	33	81.5478	24.0907	3.385	0.002192	**	0.326111	NUMBL_1	NUMBL	0.0499219
FP015061	21	16939.7	4783.71	3.5411	0.002182	**	0.63054	TAS2R9_1	TAS2R9	0.0499219
FP001573	19	117.334	32.2056	3.6433	0.00219	**	0.481505	MRPL9_1	MRPL9	0.0499219
FP022090	19	443.248	121.668	3.6431	0.00219	**	0.673356	PAPL_1	PAPL	0.0499219
FP005935	18	129.788	34.6933	3.741	0.002192	**	0.707045	SMIM20_1	SMIM20	0.0499219
FP004805	16	629.853	165.555	3.8045	0.002189	**	0.72583	NEK4_1	NEK4	0.0499219
FP016162	20	171.258	47.5328	3.6029	0.002195	**	0.658012	RILPL2_1	RILPL2	0.0499439
FP022995	18	12054.1	3224.18	3.7386	0.002202	**	0.706822	SPTLC3_1	SPTLC3	0.0500105
FP004395	17	173.625	46.4368	3.7389	0.002201	**	0.706851	DPH3_1	DPH3	0.0500105
FP023939	16	128.172	33.7321	3.7997	0.002209	**	0.725396	GSTT2B_1	GSTT2B	0.0500768
FP023943	16	128.172	33.7321	3.7997	0.002209	**	0.725396	GSTT2_1	GSTT2	0.0500768
FP021311	24	94.9687	26.8811	3.5329	0.002223	**	0.176342	PIAS4_1	PIAS4	0.0503239
FP009611	20	126.505	35.1718	3.5968	0.002224	**	0.657373	ZNF716_1	ZNF716	0.0503239
FP011494	21	416.491	117.026	3.559	0.002243	**	0.733217	KIAA1045_1	KIAA1045	0.0507071
FP019363	16	870.435	229.731	3.7889	0.002254	**	0.724421	TM4SF5_1	TM4SF5	0.0508154
FP023319	15	631.283	159.595	3.9555	0.002251	**	0.76628	ZSWIM1_1	ZSWIM1	0.0508154
FP004561	12	2012.97	477.501	4.2156	0.002254	**	0.814753	ACKR2_1	ACKR2	0.0508154
FP014756	19	92.684	25.2393	3.6722	0.002264	**	0.688048	SC5DL_1	SC5DL	0.0509006
FP007003	17	3344.2	897.776	3.725	0.002263	**	0.533688	PIK3R1_4	PIK3R1	0.0509006
FP003123	15	255.887	66.258	3.862	0.00226	**	0.744414	TPRKB_1	TPRKB	0.0509006
FP020412	16	90.9064	24.4194	3.7227	0.002273	**	0.705311	CEP95_1	CEP95	0.0509629
FP020491	15	7984.09	2068.58	3.8597	0.00227	**	0.744217	CD300C_1	CD300C	0.0509629
FP024013	12	144.416	35.5359	4.0639	0.002272	**	0.789218	ASCC2_1	ASCC2	0.0509629
FP011917	22	3401.7	965.947	3.5216	0.002281	**	0.628443	RGS3_5	RGS3	0.0510008
FP012691	20	5379.38	1500.65	3.5847	0.002283	**	0.536817	ANK3_4	ANK3	0.0510008
FP023346	19	269.893	74.484	3.6235	0.002283	**	0.671367	TP53RK_1	TP53RK	0.0510008
FP018326	17	251.396	67.562	3.721	0.002281	**	0.705145	TSC2_1	TSC2	0.0510008
FP013079	24	162.678	46.9038	3.4683	0.002298	**	0.709103	SFXN3_2	SFXN3	0.0512185
FP024397	17	198.429	52.5099	3.7789	0.002298	**	0.723507	RABL2B_1	RABL2B	0.0512185
FP000013	12	158.344	37.68	4.2023	0.002299	**	0.813886	TTLL10_1	TTLL10	0.0512185
FP022584	14	919.269	239.036	3.8457	0.002328	**	0.743012	ZNF175_1	ZNF175	0.0518175
FP015933	16	148.36	39.3524	3.77	0.002337	**	0.722697	PRDM4_1	PRDM4	0.0519707
FP021060	15	126.16	32.8542	3.84	0.002352	**	0.333616	PMAIP1_1	PMAIP1	0.052257
FP005329	16	2449.56	650.489	3.7657	0.002356	**	0.722301	PRR23B_1	PRR23B	0.0522985
FP012034	20	176.58	49.4769	3.5689	0.002363	**	0.654467	ZBTB43_1	ZBTB43	0.052312
FP016884	20	1259.71	352.937	3.5692	0.002361	**	0.654498	GEMIN2_1	GEMIN2	0.052312
FP016904	16	1527.93	398.163	3.8374	0.002363	**	0.742293	RPL10L_1	RPL10L	0.052312
FP009932	22	189.472	53.6011	3.5349	0.002366	**	0.640112	PLOD3_1	PLOD3	0.0523312
FP020075	77	488.633	154.656	3.1595	0.002372	**	0.448199	MEOX1_1	MEOX1	0.0524167
FP007284	16	324.993	86.4195	3.7606	0.002379	**	0.721835	MARCH3_1	42797	0.0525233
FP013702	16	-1593.51	415.697	-3.8333	0.0023811	**	-0.741936	UEVLD_2	UEVLD	0.0525233
FP009686	14	148.512	38.7522	3.8324	0.002385	**	0.741851	POR_2	POR	0.0525621
FP011532	18	111.643	30.1992	3.6969	0.002392	**	0.702838	C9ORF19_1	C9ORF19	0.0526691
FP016648	20	240.403	67.4991	3.5616	0.002401	**	0.653694	GRK1_1	GRK1	0.0528198
FP015149	18	349.469	95.9744	3.6413	0.002413	**	0.684978	SLCO1B1_1	SLCO1B1	0.0529415
FP017728	16	3631.83	967.661	3.7532	0.002413	**	0.72115	GNB5_3	GNB5	0.0529415
FP022023	16	-631.871	168.341	-3.7535	0.002411	**	-0.72118	ZNF829_2	ZNF829	0.0529415
FP003095	17	207.451	55.2941	3.7518	0.002419	**	0.721018	TEX261_1	TEX261	0.05299
FP019168	17	340.921	92.396	3.6898	0.002426	**	0.702156	CRISPLD2_1	CRISPLD2	0.05299
FP023422	17	5959.37	1615.03	3.6899	0.002425	**	0.702169	MTRNR2L3_1	MTRNR2L3	0.05299
FP019357	14	783.308	204.855	3.8237	0.002423	**	0.741098	ALOX15_1	ALOX15	0.05299
FP018225	13	255.18	61.2327	4.1674	0.002421	**	0.811581	NME4_1	NME4	0.05299
FP024019	22	347.298	98.6455	3.5207	0.002442	**	0.638591	GATSL3_1	GATSL3	0.0531975
FP019514	16	365.945	97.6631	3.747	0.002441	**	0.720578	KRBA2_2	KRBA2	0.0531975
FP025319	14	170.587	43.6468	3.9083	0.002441	**	0.762466	CXorf40B_1	CXorf40B	0.0531975
FP015032	44	344.578	106.013	3.2503	0.002458	**	0.595092	A2M_1	A2M	0.0534001
FP018019	36	418.8	127.722	3.279	0.00246	**	0.557547	DNAJA4_3	DNAJA4	0.0534001
FP012285	17	174.719	47.4374	3.6832	0.002458	**	0.701514	NPDC1_2	NPDC1	0.0534001
FP015502	17	5671.82	1515.2	3.7433	0.002459	**	0.720232	NFE2_2	NFE2	0.0534001
FP000465	22	-3159.55	898.641	-3.5159	0.002468	**	-0.638082	RPS6KA1_2	RPS6KA1	0.0535147
FP024725	19	911.676	254.266	3.5855	0.002474	**	0.667475	GAGE10_1	GAGE10	0.0535147
FP016003	15	1803.74	473.09	3.8127	0.002472	**	0.740131	BRAP_3	BRAP	0.0535147
FP011582	4	427.52	1.6596	257.61	0.002471	**	0.999992	CBWD3_2	CBWD3	0.0535147
FP025432	14	143.144	36.7189	3.8984	0.002484	**	0.761649	CTAG1A_1	CTAG1A	0.0536365
FP025433	14	143.144	36.7189	3.8984	0.002484	**	0.761649	CTAG1B_1	CTAG1B	0.0536365
FP012282	20	437.625	123.449	3.545	0.002489	**	0.651946	CLIC3_1	CLIC3	0.0536972
FP022829	16	194.431	52.0546	3.7351	0.002497	**	0.719478	ZNF544_1	ZNF544	0.0538184
FP012805	15	4463.34	1172.51	3.8067	0.002499	**	0.739602	DNAJC9_1	DNAJC9	0.0538184
FP000639	22	238.279	67.9271	3.5079	0.002513	**	0.378637	ADPRHL2_1	ADPRHL2	0.0540724
FP006687	40	222.157	68.2821	3.2535	0.002528	**	0.214762	ACSL1_4	ACSL1	0.0542052
FP005039	24	50.023	14.591	3.4284	0.002524	**	0.599041	PVRL3_2	PVRL3	0.0542052
FP011114	18	2090.41	569.651	3.6696	0.002525	**	0.700202	TBC1D31_1	TBC1D31	0.0542052
FP010437	15	1185.63	317.978	3.7286	0.002528	**	0.718873	DEFB104A_1	DEFB104A	0.0542052
FP015952	17	400.216	109.254	3.6632	0.002557	**	0.699574	USP30_1	USP30	0.0547792
FP003248	14	273.7	70.555	3.8792	0.002567	**	0.760074	TEKT4_1	TEKT4	0.0549454
FP020782	16	274.494	73.7989	3.7195	0.002573	**	0.718019	EPB41L3_2	EPB41L3	0.0550259
FP009613	19	375.511	105.314	3.5656	0.00258	**	0.386825	ZNF680_1	ZNF680	0.0551276
FP013502	17	1462.5	399.816	3.6579	0.002584	**	0.699063	PGAP2_2	PGAP2	0.055165
FP017079	21	196.921	56.3673	3.4935	0.002594	**	0.635663	ZFP36L1_2	ZFP36L1	0.0552344
FP014318	17	298.21	81.5694	3.6559	0.002594	**	0.698863	CTTN_3	CTTN	0.0552344
FP018631	16	353.183	95.0586	3.7154	0.002593	**	0.717639	CCDC101_1	CCDC101	0.0552344
FP008121	22	350.831	101.334	3.4621	0.00261	**	0.621956	ZKSCAN4_2	ZKSCAN4	0.0552768
FP013620	21	5213.28	1493.11	3.4915	0.002605	**	0.635448	AMPD3_5	AMPD3	0.0552768
FP006038	20	-1897.27	538.276	-3.5247	0.0026008	**	-0.649796	USP46_2	USP46	0.0552768
FP019149	18	286.121	78.3313	3.6527	0.002611	**	0.69855	SDR42E1_1	SDR42E1	0.0552768
FP002887	17	162.568	44.5085	3.6525	0.002612	**	0.698533	GEMIN6_1	GEMIN6	0.0552768
FP013238	15	150.703	39.8481	3.7819	0.002614	**	0.737414	RAB11FIP2_1	RAB11FIP2	0.0552768
FP024969	14	9957.57	2632.9	3.782	0.002614	**	0.737418	CENPI_2	CENPI	0.0552768
FP015465	11	288.478	70.071	4.1169	0.00261	**	0.808189	ESPL1_1	ESPL1	0.0552768
FP010919	20	7104.84	1996.87	3.558	0.002622	**	0.664619	LRRCC1_2	LRRCC1	0.0553982
FP006114	13	12569.3	3163.28	3.9735	0.002628	**	0.782455	PROL3_1	PROL3	0.0554772
FP003791	85	213.882	68.815	3.1081	0.002649	**	0.533049	COL3A1_1	COL3A1	0.0558725
FP008277	20	112.314	31.9546	3.5148	0.002657	**	0.739904	DXO_1	DXO	0.0559124
FP015134	19	19291.9	5367.83	3.594	0.002658	**	0.680211	RERGL_1	RERGL	0.0559124
FP001580	16	3496.67	944.539	3.702	0.00266	**	0.716376	C2CD4D_1	C2CD4D	0.0559124
FP005805	15	82.7425	21.9291	3.7732	0.002656	**	0.736633	NOP14_1	NOP14	0.0559124
FP015503	53	133.519	42.1065	3.171	0.002675	**	0.601707	NFE2_1	NFE2	0.0561405
FP017259	19	5086.9	1433.81	3.5478	0.002679	**	0.663557	C14orf159_2	C14orf159	0.0561405
FP010947	18	1129.21	314.478	3.5907	0.002676	**	0.679882	NECAB1_1	NECAB1	0.0561405
FP014509	6	4638.48	699.26	6.6334	0.00268	**	0.957429	C11orf54_2	C11orf54	0.0561405
FP004736	20	9475.89	2672.67	3.5455	0.002692	**	0.663309	RASSF1_4	RASSF1	0.0563438
FP003758	21	300.19	86.3564	3.4762	0.002696	**	0.674235	CWC22_1	CWC22	0.0563795
FP001531	77	319.429	102.537	3.1152	0.002705	**	0.370701	GOLPH3L_1	GOLPH3L	0.0564235
FP006858	16	199.869	53.1114	3.7632	0.002705	**	0.73574	WDR70_1	WDR70	0.0564235
FP016183	13	82.6027	20.8773	3.9566	0.002701	**	0.781157	AACS_1	AACS	0.0564235
FP018121	19	8708.16	2429.18	3.5848	0.002709	**	0.679277	FANCI_2	FANCI	0.056459
FP023795	16	862.415	233.614	3.6916	0.002713	**	0.715398	ITGB2_3	ITGB2	0.0564944
FP013879	50	181.045	56.9769	3.1775	0.002717	**	0.62576	ARHGAP1_1	ARHGAP1	0.0565297
FP015168	65	447.568	143.021	3.1294	0.002741	**	0.223186	SOX5_2	SOX5	0.0568996
FP007177	30	98.5814	29.9044	3.2966	0.002745	**	0.480292	RGMB_1	RGMB	0.0568996
FP015883	26	262.096	77.2519	3.3927	0.002744	**	0.5954	CCDC53_1	CCDC53	0.0568996
FP019759	20	359.209	101.597	3.5356	0.002749	**	0.49945	UTP6_1	UTP6	0.0568996
FP012867	19	70.0521	19.8147	3.5354	0.00275	**	0.662247	ANXA11_1	ANXA11	0.0568996
FP005777	13	13086.8	3408.81	3.8391	0.002751	**	0.756723	WHSC1_5	WHSC1	0.0568996
FP021885	12	99.6386	24.4042	4.0828	0.002746	**	0.760313	PLEKHF1_1	PLEKHF1	0.0568996
FP016700	11	443.305	104.025	4.2615	0.002756	**	0.833185	RNASE8_1	RNASE8	0.056955
FP024200	14	-9816.01	2558.77	-3.8362	0.002764	**	-0.75648	APOBEC3H_1	APOBEC3H	0.0570723
FP020473	21	208.968	59.7819	3.4955	0.002771	**	0.664262	C17orf80_2	C17orf80	0.0570728
FP003616	20	8032.01	2297.73	3.4956	0.00277	**	0.697604	DPP4_1	DPP4	0.0570728
FP017146	17	1071.86	291.201	3.6808	0.00277	**	0.714373	FAM161B_1	FAM161B	0.0570728
FP003254	18	322.433	89.0832	3.6195	0.002789	**	0.428471	PROM2_2	PROM2	0.0573474
FP006685	16	122.08	33.1999	3.6771	0.002789	**	0.714021	MLF1IP_1	MLF1IP	0.0573474
FP023846	21	1692.69	489.262	3.4597	0.002796	**	0.631971	MICAL3_3	MICAL3	0.0573951
FP014193	15	-385.954	103.049	-3.7454	0.002795	**	-0.734135	SNX32_1	SNX32	0.0573951
FP018448	22	289.899	83.8259	3.4583	0.002804	**	0.513127	ABAT_2	ABAT	0.0575113
FP000527	23	113.403	33.0622	3.43	0.002807	**	0.372515	EPB41_2	EPB41	0.0575248
FP012593	18	85.1025	23.5413	3.615	0.002813	**	0.694833	HNRPA3_1	HNRPA3	0.0575996
FP004512	18	150.998	42.3663	3.5641	0.002826	**	0.697617	EXOG_1	EXOG	0.0577695
FP024882	14	247.822	64.8129	3.8237	0.002825	**	0.755416	ACRC_1	ACRC	0.0577695
FP019817	20	367.966	105.563	3.4857	0.00283	**	0.645614	CCL16_1	CCL16	0.0578031
FP012967	21	-540.025	156.361	-3.4537	0.002833	**	-0.631316	MYOF_1	MYOF	0.0578163
FP016757	71	183.939	59.2472	3.1046	0.002871	**	0.391726	SLC22A17_2	SLC22A17	0.0579581
FP010664	21	2172.06	623.767	3.4822	0.002852	**	0.645228	NRG1_4	NRG1	0.0579581
FP002679	20	3269.16	939.256	3.4806	0.002862	**	0.645057	LPIN1_4	LPIN1	0.0579581
FP003351	20	5094.44	1448.74	3.5165	0.002862	**	0.660253	FHL2_4	FHL2	0.0579581
FP004728	20	14441.3	4108.04	3.5154	0.002869	**	0.660139	LSMEM2_1	LSMEM2	0.0579581
FP022022	20	199.71	57.3323	3.4834	0.002845	**	0.705392	ZNF345_3	ZNF345	0.0579581
FP007562	18	1154.4	324.366	3.5589	0.002856	**	0.676623	SPINK5_1	SPINK5	0.0579581
FP012054	17	202.416	56.081	3.6094	0.002845	**	0.720363	SH2D3C_2	SH2D3C	0.0579581
FP024766	17	79.7365	22.1206	3.6046	0.002872	**	0.693797	FAM156A_2	FAM156A	0.0579581
FP004866	15	166.895	44.699	3.7338	0.002854	**	0.733083	KCTD6_1	KCTD6	0.0579581
FP020775	15	136.325	36.5457	3.7303	0.002873	**	0.775591	ZBTB14_3	ZBTB14	0.0579581
FP025431	15	-5563.02	1490.77	-3.7316	0.002865	**	-0.732891	IKBKG_4	IKBKG	0.0579581
FP002629	13	208.923	54.7529	3.8158	0.002864	**	0.754745	COLEC11_3	COLEC11	0.0579581
FP008207	11	360.959	85.3146	4.2309	0.002873	**	0.831341	HCG27_1	HCG27	0.0579581
FP018133	20	200.565	57.686	3.4768	0.002885	**	0.669561	AP3S2_2	AP3S2	0.058026
FP015701	19	1694.92	482.721	3.5112	0.002894	**	0.659695	IL26_1	IL26	0.058026
FP015942	18	481.456	133.747	3.5998	0.0029	**	0.69331	TMEM119_1	TMEM119	0.058026
FP005949	17	103.543	29.15	3.5521	0.002897	**	0.675916	RELL1_1	RELL1	0.058026
FP008755	16	354.469	96.9242	3.6572	0.002897	**	0.712115	LYRM2_2	LYRM2	0.058026
FP003073	15	145.302	39.0032	3.7254	0.002898	**	0.732322	ANXA4_1	ANXA4	0.058026
FP013396	15	-3346.08	898.216	-3.7253	0.002899	**	-0.73231	RNH1_3	RNH1	0.058026
FP009629	13	169.794	43.3734	3.9147	0.002891	**	0.777902	TMEM248_1	TMEM248	0.058026
FP007409	12	130.891	32.3388	4.0475	0.002896	**	0.80338	CTNNA1_1	CTNNA1	0.058026
FP013411	9	154.829	34.6065	4.474	0.002887	**	0.661452	DRD4_1	DRD4	0.058026
FP014205	21	212.807	61.2566	3.474	0.002903	**	0.644346	EIF1AD_1	EIF1AD	0.0580387
FP011612	30	3604.36	1096.91	3.2859	0.002909	**	0.396487	TMC1_2	TMC1	0.0580841
FP021707	20	115.508	33.2599	3.4729	0.00291	**	0.644224	AP1M1_1	AP1M1	0.0580841
FP015311	22	256.274	74.4907	3.4403	0.002919	**	0.608422	ZNF641_1	ZNF641	0.058122
FP016281	20	141.558	40.7723	3.4719	0.002916	**	0.644119	RNF6_1	RNF6	0.058122
FP020788	16	-6811.13	1864.36	-3.6533	0.0029187	**	-0.711747	ARHGAP28_1	ARHGAP28	0.058122
FP019338	22	146.767	43.0116	3.4123	0.002922	**	0.616416	ITGAE_1	ITGAE	0.0581345
FP005227	9	87.9851	19.7381	4.4576	0.002944	**	0.859936	RAB43_2	RAB43	0.0585248
FP017826	15	-251.967	66.3345	-3.7984	0.002951	**	-0.80293	ANKDD1A_1	ANKDD1A	0.0586165
FP019798	11	627.807	155.696	4.0322	0.002963	**	0.802304	SLFN12_2	SLFN12	0.0588073
FP007925	17	383.067	105.141	3.6434	0.002975	**	0.652699	CDYL_1	CDYL	0.0589026
FP021000	15	144.36	38.8927	3.7117	0.002971	**	0.731074	SKA1_1	SKA1	0.0589026
FP022345	15	8864.25	2433.01	3.6433	0.002975	**	0.710782	IGFL3_1	IGFL3	0.0589026
FP010168	20	254.048	73.3982	3.4612	0.002985	**	0.642956	AKR1B1_1	AKR1B1	0.059053
FP022996	25	140.14	41.4869	3.3779	0.00299	**	0.760115	ISM1_1	ISM1	0.0590765
FP018877	21	246.088	71.7603	3.4293	0.002991	**	0.628621	POLR2C_1	POLR2C	0.0590765
FP004964	18	192.084	54.3587	3.5336	0.003009	**	0.674003	NSUN3_1	NSUN3	0.0592251
FP010211	17	240.089	67.0513	3.5807	0.003012	**	0.691395	C7orf55-LUC7L2_1	C7orf55-LUC7L2	0.0592251
FP011283	17	236.614	65.0292	3.6386	0.003002	**	0.710324	C8orf82_1	C8orf82	0.0592251
FP011860	16	117.881	31.8235	3.7042	0.003013	**	0.730383	PTPN3_1	PTPN3	0.0592251
FP015524	14	285.189	75.3193	3.7864	0.003013	**	0.75223	ITGA7_2	ITGA7	0.0592251
FP001163	12	1995.08	512.73	3.8911	0.003004	**	0.776041	BRDT_2	BRDT	0.0592251
FP009465	27	163.717	49.6449	3.2978	0.003028	**	0.601962	PDE1C_1	PDE1C	0.0594444
FP009186	17	38597.1	10788.1	3.5777	0.003029	**	0.691099	CCR6_1	CCR6	0.0594444
FP024429	30	159.454	48.587	3.2818	0.003039	**	0.500919	MXRA5_1	MXRA5	0.059593
FP000010	15	341.281	93.9804	3.6314	0.003044	**	0.709629	RNF223_1	RNF223	0.0596435
FP015550	18	208.519	59.1137	3.5274	0.003047	**	0.673356	SUOX_1	SUOX	0.0596546
FP018139	15	259.692	70.265	3.6959	0.003059	**	0.729617	SEMA4B_2	SEMA4B	0.0598418
FP001555	13	305.465	76.1727	4.0102	0.003063	**	0.608295	TCFL1_1	TCFL1	0.0598724
FP019879	20	2008.86	576.688	3.4834	0.003069	**	0.656736	RPL19_1	RPL19	0.0598943
FP006386	10	85.631	19.3569	4.4238	0.003067	**	0.858222	CCDC109B_1	CCDC109B	0.0598943
FP024239	21	208.587	60.5714	3.4436	0.0031	**	0.721943	TEF_1	TEF	0.0604033
FP016558	20	231.756	67.2968	3.4438	0.0031	**	0.686188	STK24_2	STK24	0.0604033
FP006363	22	270.257	79.8304	3.3854	0.003105	**	0.613391	NPNT_1	NPNT	0.0604527
FP002273	21	361	105.822	3.4114	0.003112	**	0.626628	CTSE_1	CTSE	0.0605333
FP024735	20	205.893	59.8348	3.441	0.003118	**	0.640746	PAGE1_1	PAGE1	0.0605333
FP019292	16	202.786	56.0399	3.6186	0.003119	**	0.747585	PRPF8_1	PRPF8	0.0605333
FP005558	15	311.821	82.7786	3.7669	0.003117	**	0.750543	LAMP3_1	LAMP3	0.0605333
FP013774	15	594.255	157.84	3.7649	0.003128	**	0.550974	EIF3M_1	EIF3M	0.06066
FP001541	21	798.709	234.374	3.4078	0.003137	**	0.626233	FAM63A_2	FAM63A	0.0607865
FP017681	41	152.277	48.1018	3.1657	0.003144	**	0.578262	SEMA6D_2	SEMA6D	0.0608261
FP017073	19	121.981	35.4866	3.4374	0.003143	**	0.640345	VTI1B_1	VTI1B	0.0608261
FP007354	15	308.113	81.9444	3.76	0.003155	**	0.749941	CDKN2AIPNL_1	CDKN2AIPNL	0.0609909
FP017449	19	354.03	102.056	3.469	0.003164	**	0.65518	CYFIP1_3	CYFIP1	0.061088
FP024571	15	4188.83	1139.11	3.6773	0.003165	**	0.72789	ZFX_2	ZFX	0.061088
FP019867	9	137.98	29.0701	4.7464	0.00317	**	0.888643	CISD3_1	CISD3	0.0611364
FP006712	13	170.833	44.3039	3.8559	0.003181	**	0.773228	AC110771.1_1	AC110771.1	0.0612523
FP000105	7	87.3889	16.4758	5.3041	0.003181	**	0.921463	DFFB_1	DFFB	0.0612523
FP014497	13	4887.52	1267.81	3.8551	0.003186	**	0.77316	TRIM49D1_1	TRIM49D1	0.0613005
FP001871	21	11874.8	3493.4	3.3992	0.003197	**	0.335417	LY9_2	LY9	0.0613679
FP009456	19	3398.76	969.782	3.5047	0.003193	**	0.174674	GHRHR_2	GHRHR	0.0613679
FP003942	14	95.7977	26.0885	3.672	0.003195	**	0.727401	METTL21A_1	METTL21A	0.0613679
FP005983	23	1269.68	376.563	3.3718	0.003202	**	0.611849	APBB2_2	APBB2	0.0614159
FP012596	17	259.095	72.9974	3.5494	0.003205	**	0.769458	DEPP_1	DEPP	0.0614254
FP019359	36	127.71	39.8722	3.203	0.003214	**	0.528774	ARRB2_1	ARRB2	0.0615499
FP002363	58	303.036	97.8268	3.0977	0.003225	**	0.517966	ESRRG_6	ESRRG	0.0616163
FP000345	17	261.397	73.6987	3.5468	0.003221	**	0.762417	SH2D5_1	SH2D5	0.0616163
FP015004	15	1293.23	345.118	3.7472	0.003225	**	0.74882	APOBEC1_1	APOBEC1	0.0616163
FP012548	22	85.2765	25.3484	3.3642	0.003258	**	0.519654	NRP1_1	NRP1	0.0621984
FP021820	16	-5162.69	1436	-3.5952	0.003262	**	-0.706089	MEF2B_1	MEF2B	0.0622264
FP022313	21	179.853	53.0592	3.3897	0.003265	**	0.332701	ERCC1_2	ERCC1	0.0622353
FP017196	16	260.299	72.4338	3.5936	0.003272	**	0.705934	NGB_1	NGB	0.062272
FP010423	14	2275.07	621.736	3.6592	0.003271	**	0.726204	DEFA4_1	DEFA4	0.062272
FP007599	18	1504.3	430.77	3.4921	0.003276	**	0.669648	TCOF1_2	TCOF1	0.0622998
FP020415	17	2534.83	716.501	3.5378	0.00328	**	0.7482	LRRC37A3_3	LRRC37A3	0.0623072
FP017471	12	237.845	59.999	3.9641	0.003284	**	0.797396	GABRG3_1	GABRG3	0.0623072
FP021770	12	724.952	182.862	3.9645	0.003282	**	0.791296	MAST3_1	MAST3	0.0623072
FP014975	4	80.3462	4.62011	17.3905	0.00329	**	0.99671	TPI1_2	TPI1	0.0623728
FP023041	24	122.18	36.6574	3.333	0.003315	**	0.636051	C20orf26_1	C20orf26	0.0627499
FP021643	21	772.172	228.249	3.383	0.003314	**	0.574532	PODNL1_1	PODNL1	0.0627499
FP020119	19	1544.98	448.336	3.446	0.003321	**	0.652696	GJC1_1	GJC1	0.0627666
FP018124	15	1380.67	378.135	3.6513	0.003319	**	0.725456	TICRR_1	TICRR	0.0627666
FP007854	15	424.49	116.284	3.6505	0.003324	**	0.725382	SQSTM1_3	SQSTM1	0.062775
FP016401	38	239.089	75.5571	3.1643	0.003332	**	0.521098	TSC22_1	TSC22	0.0628777
FP009627	16	6413.15	1791.02	3.5807	0.003353	**	0.704661	RABGEF1_1	RABGEF1	0.0632254
FP016911	14	296.576	77.5915	3.8223	0.003361	**	0.770492	DNAAF2_1	DNAAF2	0.0633276
FP005613	44	346.532	111.031	3.121	0.003387	**	0.471109	IGF2BP2_2	IGF2BP2	0.0635217
FP014820	25	385.993	116.873	3.3027	0.003389	**	0.58468	ETS1_1	ETS1	0.0635217
FP006361	23	225.788	66.945	3.3727	0.00339	**	0.313329	GSTCD_1	GSTCD	0.0635217
FP022516	19	722.253	207.713	3.4772	0.003378	**	0.66806	ATF5_1	ATF5	0.0635217
FP013114	16	189.636	53.0407	3.5753	0.003388	**	0.704122	C10orf95_1	C10orf95	0.0635217
FP021867	16	5610.32	1569.41	3.5748	0.003392	**	0.704072	ZNF676_1	ZNF676	0.0635217
FP020606	14	195.094	52.4374	3.7205	0.003379	**	0.746462	TMC6_2	TMC6	0.0635217
FP009975	12	78.9272	20.0084	3.9447	0.003382	**	0.795965	SRPK2_2	SRPK2	0.0635217
FP018890	15	12194	3351.79	3.638	0.0034	**	0.724208	KIFC3_5	KIFC3	0.063623
FP017200	71	239.088	78.5969	3.042	0.003406	**	0.521903	TMED8_2	TMED8	0.0636868
FP021220	18	112.251	32.3469	3.4702	0.003427	**	0.667321	TCF3_4	TCF3	0.063982
FP017455	16	899.43	251.961	3.5697	0.003425	**	0.703568	NPAP1_1	NPAP1	0.063982
FP014062	53	207.128	67.1972	3.0824	0.00343	**	0.281617	GNG3_1	GNG3	0.0639893
FP021989	19	145.144	42.316	3.43	0.003436	**	0.650948	SDHAF1_1	SDHAF1	0.0640526
FP021712	14	248.265	68.3633	3.6316	0.003441	**	0.723593	CHERP_2	CHERP	0.0640971
FP000451	21	168.689	50.1556	3.3633	0.003462	**	0.62122	ZNF593_1	ZNF593	0.0641362
FP017654	20	4595.32	1325.91	3.4658	0.003458	**	0.666846	CTDSPL2_3	CTDSPL2	0.0641362
FP010771	19	153.574	44.3047	3.4663	0.003454	**	0.60472	RB1CC1_1	RB1CC1	0.0641362
FP015035	18	7651.1	2208.14	3.465	0.003464	**	0.490472	CLECL1_1	CLECL1	0.0641362
FP007731	17	1338.28	381.174	3.5109	0.003459	**	0.768464	LCP2_2	LCP2	0.0641362
FP023257	17	175.459	49.9591	3.5121	0.003452	**	0.684383	GTSF1L_1	GTSF1L	0.0641362
FP008499	16	158.417	44.4215	3.5662	0.003448	**	0.703218	RRP36_1	RRP36	0.0641362
FP012077	8	103.744	22.253	4.662	0.00346	**	0.885247	PTGES2_2	PTGES2	0.0641362
FP023811	16	10141.5	2848.55	3.5602	0.003487	**	0.702622	PCBP3_3	PCBP3	0.0645134
FP005752	15	53.4425	14.4449	3.6998	0.003503	**	0.74461	FGFRL1_4	FGFRL1	0.0647607
FP007013	16	215.551	59.5272	3.6211	0.003508	**	0.722594	RAD17_2	RAD17	0.0648043
FP009574	11	357.177	91.118	3.9199	0.003511	**	0.794123	UP_1	UP	0.0648109
FP001324	18	388.709	112.412	3.4579	0.003514	**	0.666003	OVGP1_1	OVGP1	0.0648176
FP016310	33	140.689	44.2956	3.1761	0.003527	**	0.663045	MTUS2_2	MTUS2	0.0650085
FP007694	17	3512.26	1003.61	3.4996	0.003538	**	0.683092	FABP6_2	FABP6	0.0651135
FP000235	14	101.18	27.3889	3.6942	0.003537	**	0.744112	PRDM2_1	PRDM2	0.0651135
FP011662	21	23325.9	6960	3.3514	0.003554	**	0.691455	AGTPBP1_3	AGTPBP1	0.0651821
FP009765	20	27437.7	8116.73	3.3804	0.003555	**	0.634018	CLDN12_1	CLDN12	0.0651821
FP022347	15	8066.13	2231.12	3.6153	0.003545	**	0.722043	IGFL2_2	IGFL2	0.0651821
FP021966	14	161.255	43.673	3.6923	0.003549	**	0.743942	GAPDHS_1	GAPDHS	0.0651821
FP010571	11	3346.92	820.997	4.0767	0.003551	**	0.821614	RHOBTB2_1	RHOBTB2	0.0651821
FP009924	17	-19793.2	5660.79	-3.4966	0.00356	**	-0.682772	MUC12_1	MUC12	0.065225
FP019695	50	217.375	70.598	3.079	0.003571	**	0.203932	FOXN1_1	FOXN1	0.0653778
FP022994	75	741.598	245.565	3.02	0.003575	**	0.313458	BTBD3_4	BTBD3	0.0654023
FP023867	18	201.169	58.3247	3.4491	0.003578	**	0.66506	TBX1_1	TBX1	0.0654084
FP004702	26	437.337	134.829	3.2436	0.003584	**	0.560237	AMT_1	AMT	0.065439
FP014977	18	151.704	44.002	3.4477	0.003589	**	0.664904	LRRC23_1	LRRC23	0.065439
FP009184	14	73.1828	19.8583	3.6853	0.003593	**	0.743305	RNASET2_1	RNASET2	0.065439
FP016159	8	6248.62	1019.51	6.129	0.003591	**	0.950666	SBNO1_2	SBNO1	0.065439
FP012171	7	1423.45	232.247	6.129	0.003591	**	0.950666	RAPGEF1_2	RAPGEF1	0.065439
FP019291	19	137.432	40.3373	3.4071	0.003606	**	0.64843	RILP_1	RILP	0.0656271
FP013201	15	3965.85	1119.61	3.5422	0.00361	**	0.700811	PLEKHS1_1	PLEKHS1	0.0656389
FP017429	12	96.893	24.835	3.9014	0.003612	**	0.636417	PACS2_1	PACS2	0.0656389
FP021394	13	356.301	96.7905	3.6812	0.003618	**	0.742935	MBD3L5_1	MBD3L5	0.0656508
FP021397	13	356.301	96.7905	3.6812	0.003618	**	0.742935	MBD3L3_1	MBD3L3	0.0656508
FP012329	21	178.513	53.4059	3.3426	0.003624	**	0.61886	TUBB8_1	TUBB8	0.0656988
FP021698	21	199.598	59.2043	3.3713	0.003626	**	0.695419	TPM4_1	TPM4	0.0656988
FP012085	25	145.206	44.3687	3.2727	0.003634	**	0.347801	CIZ1_1	CIZ1	0.0657467
FP023959	20	467.946	138.839	3.3704	0.003633	**	0.632899	GGT1_1	GGT1	0.0657467
FP009892	19	191.29	56.236	3.4016	0.003648	**	0.647825	ZCWPW1_2	ZCWPW1	0.0659514
FP002838	21	52.8089	15.6792	3.3681	0.003651	**	0.632635	LBH_1	LBH	0.0659571
FP005989	64	-523.632	172.965	-3.0274	0.003676	**	-0.43502	LIMCH1_4	LIMCH1	0.0659718
FP005652	52	200.479	65.4571	3.0628	0.003658	**	0.166989	TP63_2	TP63	0.0659718
FP003090	20	1826.82	542.647	3.3665	0.003664	**	0.188801	CLEC4F_1	CLEC4F	0.0659718
FP017104	19	52.0506	15.317	3.3982	0.003674	**	0.647453	TTC9_1	TTC9	0.0659718
FP009114	18	757.889	220.526	3.4367	0.00367	**	0.663725	MTRF1L_1	MTRF1L	0.0659718
FP009707	18	39698.2	11549.9	3.4371	0.003668	**	0.706278	PTPN12_3	PTPN12	0.0659718
FP000771	17	139.301	39.9957	3.4829	0.003657	**	0.681346	CDC20_2	CDC20	0.0659718
FP021299	12	450.06	119.457	3.7676	0.003676	**	0.765953	MRPL54_1	MRPL54	0.0659718
FP019239	8	158.419	34.3937	4.606	0.003669	**	0.917163	ZNF276_2	ZNF276	0.0659718
FP023379	17	202.37	58.1785	3.4784	0.00369	**	0.680876	TMEM189_2	TMEM189	0.0661747
FP015328	27	168.47	51.8909	3.2466	0.003702	**	0.712313	DDN_1	DDN	0.0663289
FP012093	20	113.782	33.8485	3.3615	0.003704	**	0.631893	COQ4_2	COQ4	0.0663289
FP000515	23	392.578	118.748	3.306	0.003715	**	0.0981828	PHACTR4_2	PHACTR4	0.066429
FP005724	14	4493.75	1225.72	3.6662	0.003714	**	0.741578	LRCH3_2	LRCH3	0.066429
FP009217	11	405.592	104.469	3.8824	0.003718	**	0.791291	PRKAR1B_4	PRKAR1B	0.0664342
FP020142	16	237.132	68.2774	3.4731	0.00373	**	0.680312	ARHGAP27_1	ARHGAP27	0.0666002
FP016621	29	117.144	36.3189	3.2254	0.003744	**	0.558075	SOX1_1	SOX1	0.0668016
FP012219	31	253.984	80.0749	3.1718	0.003755	**	0.664027	COL5A1_1	COL5A1	0.0669006
FP015804	23	2859.1	866.051	3.3013	0.003754	**	0.603754	DCN_3	DCN	0.0669006
FP021417	20	169.901	50.1565	3.3874	0.003759	**	0.646253	STXBP2_1	STXBP2	0.0669233
FP010363	18	319.341	92.0662	3.4686	0.003763	**	0.679842	GALNT11_3	GALNT11	0.066946
FP016169	18	4134.19	1192.08	3.4681	0.003767	**	0.679783	DDX55_2	DDX55	0.0669686
FP011882	23	5459.96	1666.65	3.276	0.003779	**	0.590947	C9orf84_2	C9orf84	0.0670363
FP007350	19	328.354	96.9938	3.3853	0.003775	**	0.498582	CDKL3_3	CDKL3	0.0670363
FP023758	17	341.47	98.506	3.4665	0.003779	**	0.679619	RRP1B_1	RRP1B	0.0670363
FP001042	73	205.529	68.4418	3.003	0.003792	**	0.436267	WLS_1	WLS	0.0672183
FP002213	18	120.591	35.2699	3.4191	0.003806	**	0.661814	TMEM183A_1	TMEM183A	0.0674178
FP003570	32	198.218	62.6054	3.1661	0.003809	**	0.528149	ARL6IP6_1	ARL6IP6	0.0674223
FP005896	19	89.5577	26.498	3.3798	0.00382	**	0.645405	TAPT1_1	TAPT1	0.0674226
FP006067	19	60.1436	17.5996	3.4173	0.00382	**	0.66162	PAICS_4	PAICS	0.0674226
FP000181	16	107.162	30.5063	3.5128	0.003819	**	0.697833	APITD1-CORT_1	APITD1-CORT	0.0674226
FP005211	11	238.254	56.1181	4.2456	0.003814	**	0.848693	EEFSEC_1	EEFSEC	0.0674226
FP005624	20	-2117.78	632.938	-3.346	0.00383	**	-0.465446	FETUB_1	FETUB	0.0675505
FP019911	61	382.278	126.721	3.0167	0.003839	**	0.4724	MED24_3	MED24	0.0676607
FP021291	9	408.017	96.2439	4.2394	0.003843	**	0.523372	GIPC3_1	GIPC3	0.0676826
FP008826	27	97.3035	30.2727	3.2142	0.003846	**	0.588566	PPIL6_1	PPIL6	0.0676868
FP001969	22	283.44	86.1537	3.2899	0.003852	**	0.60243	XCL2_1	XCL2	0.0677439
FP020774	25	75.4217	23.2263	3.2473	0.003856	**	0.678089	C18orf42_1	C18orf42	0.0677657
FP007207	68	224.917	74.7666	3.0083	0.003859	**	0.561369	NREP_5	NREP	0.0677699
FP024113	44	190.843	62.035	3.0764	0.003873	**	0.463223	MYH9_1	MYH9	0.0677734
FP013120	25	87.0744	26.82	3.2466	0.003862	**	0.578093	ARL3_1	ARL3	0.0677734
FP011993	21	189.488	57.1944	3.3131	0.003868	**	0.693987	ZBTB6_1	ZBTB6	0.0677734
FP004594	20	-181.551	53.811	-3.3739	0.0038676	**	-0.644745	SACM1L_1	SACM1L	0.0677734
FP005738	14	463.268	127.189	3.6424	0.003872	**	0.65975	MYL5_1	MYL5	0.0677734
FP024294	5	134.181	16.4844	8.1399	0.003877	**	0.978102	PNPLA3_1	PNPLA3	0.067795
FP009434	18	133.628	39.6371	3.3713	0.003889	**	0.644456	WIPF3_1	WIPF3	0.0679081
FP019873	16	1488.46	424.846	3.5035	0.003888	**	0.696888	RPL23_1	RPL23	0.0679081
FP001134	30	174.625	54.9001	3.1808	0.003895	**	0.699744	HS2ST1_1	HS2ST1	0.0679163
FP019658	16	369.994	105.633	3.5026	0.003894	**	0.696796	ULK2_1	ULK2	0.0679163
FP010284	17	2415.62	700.074	3.4505	0.003901	**	0.677929	CUL1_1	CUL1	0.0679726
FP014365	19	193.489	57.4595	3.3674	0.003921	**	0.644022	RELT_2	RELT	0.0682727
FP021779	14	279.559	74.9944	3.7277	0.003925	**	0.762574	PDE4C_1	PDE4C	0.0682841
FP017464	13	64.0649	17.6285	3.6342	0.003928	**	0.73864	GABRB3_5	GABRB3	0.0682841
FP015754	7	-12926.8	2559.31	-5.0509	0.00393	**	-0.899976	OSBPL8_2	OSBPL8	0.0682841
FP009987	29	101.731	32.0558	3.1736	0.003964	**	0.561397	PBEF_1	PBEF	0.0683638
FP012335	20	2287.33	686.394	3.3324	0.003944	**	0.628587	PRR26_1	PRR26	0.0683638
FP018310	20	235.387	70.6916	3.3298	0.003967	**	0.628289	RPL3L_1	RPL3L	0.0683638
FP023784	19	606.336	178.401	3.3987	0.003968	**	0.509325	KRTAP10-10_1	KRTAP10-10	0.0683638
FP006941	18	378.504	109.871	3.445	0.003944	**	0.674943	ANKRD55_2	ANKRD55	0.0683638
FP021173	18	150.965	44.3886	3.401	0.00395	**	0.659835	CFD_1	CFD	0.0683638
FP024487	18	139.97	41.1609	3.4006	0.003953	**	0.65979	GEMIN8_1	GEMIN8	0.0683638
FP018120	17	284.496	82.6312	3.443	0.00396	**	0.754461	FANCI_1	FANCI	0.0683638
FP012976	14	168.382	45.2246	3.7232	0.003954	**	0.762189	PLCE1_1	PLCE1	0.0683638
FP013694	14	2632.83	724.968	3.6316	0.003945	**	0.738408	SAA1_1	SAA1	0.0683638
FP019233	13	160.439	44.2147	3.6286	0.003966	**	0.73813	SPATA33_2	SPATA33	0.0683638
FP018693	9	205.019	48.65	4.2142	0.003965	**	0.846922	MAPK3_1	MAPK3	0.0683638
FP023019	16	2685.54	756.003	3.5523	0.00398	**	0.715938	SNX5_2	SNX5	0.0685224
FP015244	33	12389.1	3937.66	3.1463	0.004002	**	0.545528	KIF21A_2	KIF21A	0.0686094
FP008842	17	5946.92	1730.66	3.4362	0.004013	**	0.469952	CDK19_2	CDK19	0.0686094
FP009472	17	1362.43	396.297	3.4379	0.004	**	-0.191492	FKBP9_2	FKBP9	0.0686094
FP002536	9	166.933	36.9207	4.5214	0.004012	**	0.879259	HEATR1_1	HEATR1	0.0686094
FP008352	5	17482.1	1110.19	15.747	0.004009	**	0.995991	BAK1_1	BAK1	0.0686094
FP013506	5	2961.7	188.082	15.747	0.004009	**	0.995991	RRM1_1	RRM1	0.0686094
FP019087	5	7352.13	466.894	15.747	0.004009	**	0.995991	DHODH_1	DHODH	0.0686094
FP010577	4	-465.207	29.5428	-15.747	0.004009	**	-0.995991	TNFRSF10D_1	TNFRSF10D	0.0686094
FP015763	4	9320.97	591.92	15.747	0.004009	**	0.995991	SYT1_3	SYT1	0.0686094
FP022800	4	4375.47	277.863	15.747	0.004009	**	0.995991	ZNF416_1	ZNF416	0.0686094
FP022349	18	243.157	71.6992	3.3913	0.004029	**	0.658779	HIF3A_1	HIF3A	0.0687872
FP018848	17	-3570.47	1039.65	-3.4343	0.004028	**	-0.676203	MT1E_1	MT1E	0.0687872
FP002989	14	-1602.18	442.782	-3.6184	0.0040375	**	-0.718418	CCDC88A_4	CCDC88A	0.0688844
FP024161	23	172.897	52.5328	3.2912	0.004059	**	0.612942	C22orf23_1	C22orf23	0.0692031
FP005864	16	162.211	46.6083	3.4803	0.004065	**	0.694499	ACOX3_2	ACOX3	0.0692573
FP004706	12	62.4732	16.3448	3.8222	0.004076	**	0.786634	BSN_1	BSN	0.0693966
FP010966	18	303.385	89.619	3.3853	0.004079	**	0.658111	TMEM67_2	TMEM67	0.0693995
FP015275	23	6886.38	2125.04	3.2406	0.004098	**	0.574414	ANO6_2	ANO6	0.069482
FP019677	18	116.809	34.526	3.3832	0.004096	**	0.657885	WSB1_1	WSB1	0.069482
FP000153	15	132.656	36.7414	3.6105	0.004094	**	0.736447	RERE_1	RERE	0.069482
FP018589	14	-742.955	205.799	-3.6101	0.004097	**	-0.736407	COG7_1	COG7	0.069482
FP023523	11	87.8741	22.112	3.974	0.004096	**	0.814719	DNAJC5_1	DNAJC5	0.069482
FP006257	15	163.832	46.3342	3.5359	0.004102	**	0.714321	KLHL8_1	KLHL8	0.0695019
FP014860	15	134.784	38.1247	3.5354	0.004106	**	0.731716	GLB1L3_1	GLB1L3	0.0695217
FP022976	20	142.934	43.138	3.3134	0.004109	**	0.626414	TMX4_1	TMX4	0.0695245
FP002105	14	1625.27	439.456	3.6984	0.00412	**	0.760043	COLGALT2_2	COLGALT2	0.0696626
FP004154	17	2391.88	698.831	3.4227	0.004123	**	0.674956	GIGYF2_2	GIGYF2	0.0696654
FP000152	16	8322.39	2397.08	3.4719	0.004131	**	0.693629	RERE_2	RERE	0.0697383
FP009212	14	360.743	100.064	3.6051	0.004133	**	0.73594	PDCD2_1	PDCD2	0.0697383
FP009167	21	216.02	65.3188	3.3072	0.004165	**	0.625696	MAP3K4_2	MAP3K4	0.0701193
FP018809	19	4217.67	1263.34	3.3385	0.004167	**	0.640772	CYLD_2	CYLD	0.0701193
FP003941	17	147.83	43.2495	3.4181	0.004161	**	0.674462	METTL21A_2	METTL21A	0.0701193
FP021449	16	248.645	70.4924	3.5273	0.004167	**	0.657265	PRAM1_1	PRAM1	0.0701193
FP022398	17	1325.69	382.649	3.4645	0.00419	**	0.692862	GLTSCR1_2	GLTSCR1	0.070458
FP001874	19	1097.38	329.038	3.3351	0.004197	**	0.640388	ITLN2_1	ITLN2	0.0705274
FP024350	13	7049.6	1961.1	3.5947	0.004209	**	0.734965	BRD1_2	BRD1	0.0706807
FP010182	20	127.852	38.3669	3.3324	0.004221	**	0.750288	WDR91_1	WDR91	0.0708337
FP013700	21	325.111	98.529	3.2996	0.004233	**	0.478009	LDHAL6A_1	LDHAL6A	0.0709866
FP008694	21	239.731	72.6851	3.2982	0.004246	**	0.624664	IRAK1BP1_1	IRAK1BP1	0.0710106
FP019360	18	146.786	43.6063	3.3662	0.004242	**	0.655995	MED11_1	MED11	0.0710106
FP005875	17	138.086	39.9362	3.4577	0.004245	**	0.69215	ZNF518B_1	ZNF518B	0.0710106
FP008466	15	224.569	63.8493	3.5172	0.004246	**	0.712461	FRS3_1	FRS3	0.0710106
FP012956	22	290.042	89.9684	3.2238	0.004258	**	0.669573	IDE_2	IDE	0.0710178
FP013431	15	361.05	102.683	3.5161	0.004253	**	0.71236	TSPAN4_3	TSPAN4	0.0710178
FP009876	5	257.166	16.8349	15.2758	0.004258	**	0.995742	TAF6_4	TAF6	0.0710178
FP008209	4	3790.84	248.159	15.276	0.004258	**	0.995742	HLA-C_1	HLA-C	0.0710178
FP001056	21	2581.5	789.869	3.2683	0.00427	**	0.691156	ZRANB2_1	ZRANB2	0.0711064
FP003358	21	2265.17	693.077	3.2683	0.00427	**	0.610264	UXS1_2	UXS1	0.0711064
FP024065	14	241.639	65.7285	3.6763	0.004272	**	0.758119	SFI1_1	SFI1	0.0711064
FP011399	20	129.007	39.169	3.2936	0.004289	**	0.624131	ACER2_1	ACER2	0.0713409
FP009596	17	8862.72	2605.04	3.4021	0.004295	**	0.672743	VOPP1_4	VOPP1	0.0713441
FP023610	15	48.839	13.6305	3.5831	0.004295	**	0.733866	SCAF4_1	SCAF4	0.0713441
FP019952	31	3960.34	1274.51	3.1074	0.0043	**	0.711093	KRTAP3-2_1	KRTAP3-2	0.0713788
FP000370	18	143.04	42.0783	3.3994	0.004318	**	0.672443	CDC42_1	CDC42	0.0716292
FP004499	17	244.01	71.8014	3.3984	0.004327	**	0.381119	VILL_2	VILL	0.0716333
FP022736	16	197.633	57.3213	3.4478	0.004326	**	0.69112	FLJ23469_1	FLJ23469	0.0716333
FP021159	8	123.962	25.0938	4.9399	0.004322	**	0.911016	POLRMT_1	POLRMT	0.0716333
FP015593	90	203.027	69.2225	2.933	0.004351	**	0.463909	BAZ2A_1	BAZ2A	0.0716922
FP002277	33	339.579	109.747	3.0942	0.004341	**	0.468482	IKBKE_1	IKBKE	0.0716922
FP003092	24	179.198	55.7449	3.2146	0.004349	**	0.644458	VAX2_1	VAX2	0.0716922
FP015207	20	-6987.85	2125.32	-3.2879	0.004342	**	-0.623471	FAR2_2	FAR2	0.0716922
FP022737	20	289.972	88.1875	3.2881	0.00434	**	0.673499	ZNF628_1	ZNF628	0.0716922
FP023910	20	83.9448	25.5379	3.2871	0.00435	**	0.623375	SDF2L1_1	SDF2L1	0.0716922
FP014713	14	2469.56	690.649	3.5757	0.004351	**	0.73317	UPK2_1	UPK2	0.0716922
FP005562	14	99.3782	27.8081	3.5737	0.004366	**	0.732981	MCF2L2_1	MCF2L2	0.0718911
FP024953	23	342.342	106.612	3.2111	0.004384	**	0.696415	NAP1L3_1	NAP1L3	0.0721237
FP020763	21	227.34	69.8203	3.2561	0.004386	**	0.60883	TGIF1_1	TGIF1	0.0721237
FP022501	14	272.622	76.3491	3.5707	0.004389	**	0.571165	ADM5_1	ADM5	0.0721247
FP012126	13	101.714	28.5206	3.5663	0.004423	**	0.230952	PPP2R4_1	PPP2R4	0.0726348
FP005437	27	342.347	108.011	3.1695	0.004439	**	0.559063	KCNAB1_2	KCNAB1	0.0727516
FP001352	18	176.897	52.8951	3.3443	0.004437	**	0.653559	PHTF1_1	PHTF1	0.0727516
FP003290	17	23331.4	6891.64	3.3855	0.004439	**	0.670931	VWA3B_1	VWA3B	0.0727516
FP008501	22	123.588	38.0418	3.2487	0.004458	**	0.607967	KLC4_1	KLC4	0.0729656
FP006832	18	220.412	65.1439	3.3835	0.004457	**	0.670712	RAD1_1	RAD1	0.0729656
FP008450	21	5300.4	1619.48	3.2729	0.004485	**	0.621727	NFYA_3	NFYA	0.0733586
FP010090	16	167.909	48.1542	3.4869	0.004489	**	0.709423	WASL_1	WASL	0.0733751
FP022044	16	1080.15	315.163	3.4273	0.0045	**	0.688962	ZNF781_1	ZNF781	0.073506
FP011003	20	633.562	193.801	3.2691	0.004521	**	0.621289	HRSP12_1	HRSP12	0.0737999
FP020520	27	220.192	70.0088	3.1452	0.004534	**	0.611184	HN1_1	HN1	0.0739629
FP017340	25	190.199	59.9215	3.1741	0.004569	**	0.584927	CCDC85C_1	CCDC85C	0.074435
FP012785	18	5940.47	1783.95	3.33	0.004569	**	0.680542	ASCC1_4	ASCC1	0.074435
FP016027	18	579.957	174.189	3.3295	0.004574	**	0.651894	DDX54_1	DDX54	0.074467
FP019231	13	156.901	44.2386	3.5467	0.004578	**	0.730402	CHMP1A_1	CHMP1A	0.0744828
FP007818	11	132.377	35.3548	3.7442	0.004595	**	0.7804	B4GALT7_1	B4GALT7	0.0747098
FP006394	45	5425.78	1808.78	2.9997	0.004634	**	0.517861	EGF_1	EGF	0.0750953
FP024820	22	106.085	32.8264	3.2317	0.004628	**	0.52839	AMER1_1	AMER1	0.0750953
FP011657	20	17215.1	5284.24	3.2578	0.004633	**	0.619966	RMI1_2	RMI1	0.0750953
FP022770	12	696.829	186.361	3.7391	0.004632	**	0.779985	ZNF583_1	ZNF583	0.0750953
FP012962	10	438.827	112.907	3.8866	0.004631	**	0.808558	EXOC6_3	EXOC6	0.0750953
FP015542	33	515.378	167.083	3.0846	0.004665	**	0.292105	WIBG_2	WIBG	0.0755478
FP001288	17	179.314	53.3664	3.3601	0.00467	**	0.668148	GSTM1_1	GSTM1	0.0755614
FP017858	13	117.543	32.4503	3.6222	0.004672	**	0.753316	DIS3L_2	DIS3L	0.0755614
FP001015	47	91.5582	30.6453	2.9877	0.004679	**	0.547762	DNAJC6_3	DNAJC6	0.075621
FP013102	28	225.908	72.1489	3.1311	0.004688	**	0.767306	PITX3_1	PITX3	0.075621
FP009259	14	183.62	51.9619	3.5337	0.004684	**	0.729152	BRAT1_1	BRAT1	0.075621
FP020686	8	76.5954	15.8022	4.8471	0.004686	**	0.908035	GCGR_1	GCGR	0.075621
FP003757	20	142.327	43.7769	3.2512	0.0047	**	0.619188	CWC22_2	CWC22	0.0756654
FP024513	19	141.782	43.2063	3.2815	0.004699	**	0.690805	SYAP1_1	SYAP1	0.0756654
FP004304	18	99.9941	29.7844	3.3573	0.004696	**	0.66784	CAMK1_1	CAMK1	0.0756654
FP017002	18	118.065	35.6063	3.3158	0.004704	**	0.650354	L3HYPDH_1	L3HYPDH	0.0756801
FP000544	54	442.275	148.898	2.9703	0.004716	**	0.559511	SERINC2_1	SERINC2	0.0757243
FP002369	17	3584.02	1068.16	3.3553	0.004714	**	0.739054	GPATCH2_1	GPATCH2	0.0757243
FP020287	12	3541.54	949.999	3.7279	0.004712	**	0.779067	TMEM100_1	TMEM100	0.0757243
FP025257	21	2425.43	746.658	3.2484	0.004728	**	0.618858	MAP7D3_1	MAP7D3	0.075866
FP009734	15	3919.15	1133.22	3.4584	0.004731	**	0.706527	SEMA3D_3	SEMA3D	0.075866
FP005995	20	621.623	191.533	3.2455	0.004758	**	0.700474	SLC30A9_1	SLC30A9	0.0762474
FP022424	19	1481.73	447.663	3.3099	0.004761	**	0.649684	KCNJ14_1	KCNJ14	0.0762474
FP001177	65	497.961	169.4	2.9396	0.004768	**	0.502605	FAM69A_3	FAM69A	0.0763098
FP007021	17	239.143	70.4089	3.3965	0.004774	**	0.685689	OCLN_1	OCLN	0.076356
FP022030	19	2255.04	689.186	3.272	0.004793	**	0.211154	ZNF383_1	ZNF383	0.0765104
FP011291	15	316.451	91.6827	3.4516	0.004791	**	0.662625	COMMD5_2	COMMD5	0.0765104
FP002587	10	273.438	67.3048	4.0627	0.004793	**	0.837972	ZNF496_1	ZNF496	0.0765104
FP000389	32	108.286	35.1221	3.0831	0.004805	**	0.512929	ASAP3_2	ASAP3	0.0766521
FP004906	32	575.833	188.617	3.0529	0.004817	**	0.649506	JWA_1	JWA	0.0767936
FP009771	64	125.748	42.8459	2.9349	0.004831	**	0.300365	FZD1_1	FZD1	0.0769148
FP004651	21	128.909	39.8067	3.2384	0.004831	**	0.61768	CCDC51_1	CCDC51	0.0769148
FP018895	14	320.469	88.978	3.6017	0.004834	**	0.751457	KIFC3_1	KIFC3	0.0769148
FP015576	27	98.8059	31.5535	3.1314	0.004855	**	0.555244	COQ10A_3	COQ10A	0.0769497
FP023542	17	-1741.94	521.455	-3.3405	0.004854	**	-0.665991	MYT1_3	MYT1	0.0769497
FP005982	15	116.861	34.4815	3.3891	0.004843	**	0.684896	APBB2_3	APBB2	0.0769497
FP010054	15	163.814	47.5594	3.4444	0.004855	**	0.783241	ST7_1	ST7	0.0769497
FP024273	11	127.568	34.3969	3.7087	0.004855	**	0.77748	CYB5R3_1	CYB5R3	0.0769497
FP010400	9	116.129	26.7201	4.3461	0.004843	**	0.871165	ESYT2_1	ESYT2	0.0769497
FP008187	18	320.257	97.0621	3.2995	0.004864	**	0.363962	DDR1_5	DDR1	0.0770426
FP019966	27	15048	4830.61	3.1151	0.00487	**	0.544723	KRTAP4-12_1	KRTAP4-12	0.0770857
FP018837	18	264.82	80.2824	3.2986	0.004873	**	0.648399	CES1_1	CES1	0.0770857
FP014858	16	720.323	212.864	3.384	0.004891	**	0.684345	THYN1_1	THYN1	0.0773206
FP004958	20	-3642.37	1126.96	-3.232	0.004898	**	-0.616931	PROS1_3	PROS1	0.0773815
FP010149	32	207.903	68.0581	3.0548	0.004903	**	0.63161	MEST_1	MEST	0.0773925
FP017539	11	561.796	146.071	3.8461	0.004905	**	0.805607	SRP14_1	SRP14	0.0773925
FP024898	61	278.915	94.9411	2.9378	0.004918	**	0.313953	CDX4_1	CDX4	0.077498
FP023145	10	80.8608	21.035	3.8441	0.004918	**	0.805464	CHMP4B_1	CHMP4B	0.077498
FP007555	15	474.604	138.094	3.4368	0.004923	**	0.704305	STK32A_1	STK32A	0.077527
FP005818	20	738.05	228.615	3.2284	0.004937	**	0.565104	TMEM128_1	TMEM128	0.0775749
FP024183	19	-115.043	35.3091	-3.2582	0.0049356	**	-0.631545	FAM227A_1	FAM227A	0.0775749
FP014685	17	127.762	38.3363	3.3327	0.004931	**	0.665117	IL10RA_1	IL10RA	0.0775749
FP000698	16	158.623	46.9552	3.3782	0.004945	**	0.683724	OXCT2_1	OXCT2	0.0775749
FP021198	13	148.827	41.4703	3.5888	0.004939	**	0.750282	ATP5D_1	ATP5D	0.0775749
FP021225	5	-796.623	106.473	-7.4819	0.004945	**	-0.974235	ATP8B3_1	ATP8B3	0.0775749
FP017705	20	-12115	3754.48	-3.2268	0.004953	**	-0.199572	HDC_2	HDC	0.0776508
FP023419	15	72.4493	21.4585	3.3762	0.004964	**	0.683515	SPO11_1	SPO11	0.0777736
FP005343	25	158.704	50.305	3.1548	0.004984	**	0.576444	ZBTB38_3	ZBTB38	0.077969
FP015569	21	1063.59	329.927	3.2237	0.004986	**	0.615946	NABP2_1	NABP2	0.077969
FP014150	15	1482.87	432.251	3.4306	0.00498	**	0.758327	AP003068.6_1	AP003068.6	0.077969
FP009179	13	184.496	52.7598	3.4969	0.004997	**	0.725562	SFT2D1_1	SFT2D1	0.0780912
FP008697	57	241.362	82.3298	2.9316	0.005002	**	0.513348	HMGN3_1	HMGN3	0.0781197
FP007845	22	305.974	95.7415	3.1958	0.005008	**	0.686914	CBY3_1	CBY3	0.0781636
FP008316	22	112.364	35.4344	3.171	0.00503	**	0.639769	TAP1_1	TAP1	0.0784571
FP023155	11	402.963	105.275	3.8277	0.005034	**	0.804254	PIGU_1	PIGU	0.0784697
FP018669	83	190.866	66.0184	2.8911	0.005054	**	0.361561	SEZ6L2_1	SEZ6L2	0.0785043
FP012042	49	124.869	42.253	2.9553	0.005053	**	0.462517	RPL12_1	RPL12	0.0785043
FP009373	31	235.559	76.8888	3.0636	0.00504	**	0.72489	FAM126A_1	FAM126A	0.0785043
FP007951	29	159.647	51.7467	3.0852	0.005065	**	0.679605	TFAP2A_2	TFAP2A	0.0785043
FP016925	26	182.333	58.8331	3.0992	0.005058	**	0.455653	MAP4K5_1	MAP4K5	0.0785043
FP000947	20	238.131	74.0318	3.2166	0.005063	**	0.479527	DHCR24_4	DHCR24	0.0785043
FP021464	18	374.065	114.039	3.2801	0.005061	**	0.646288	ZNF559_1	ZNF559	0.0785043
FP019303	15	5565.56	1626.1	3.4226	0.005054	**	0.702838	DPH1_2	DPH1	0.0785043
FP020524	15	8211.34	2398.87	3.423	0.00505	**	0.702876	NUP85_2	NUP85	0.0785043
FP014090	17	175.265	52.0904	3.3646	0.005076	**	0.135348	ATL3_1	ATL3	0.0786252
FP023783	14	1725.87	504.67	3.4198	0.00508	**	0.702542	KRTAP10-9_1	KRTAP10-9	0.0786375
FP013315	11	7635.2	1998.34	3.8208	0.005084	**	0.803736	DHX32_2	DHX32	0.0786498
FP011100	21	-9704.75	3045.36	-3.1867	0.005109	**	-0.600574	ENPP2_2	ENPP2	0.0789868
FP024705	33	527.089	173.521	3.0376	0.005117	**	0.660381	KCND1_1	KCND1	0.0790607
FP006003	40	839.324	280.51	2.9921	0.005129	**	0.520389	GABRG1_1	GABRG1	0.0790968
FP003134	32	172.837	56.5463	3.0566	0.005128	**	0.568607	DCTN1_3	DCTN1	0.0790968
FP017441	11	249.796	68.0015	3.6734	0.005128	**	0.774527	C14orf80_2	C14orf80	0.0790968
FP008764	19	137.418	42.4244	3.2391	0.005137	**	0.62932	UFL1_1	UFL1	0.0791704
FP001069	20	7899.79	2461.51	3.2093	0.005143	**	0.614236	SLC44A5_2	SLC44A5	0.0792132
FP025134	20	665.535	207.405	3.2089	0.005148	**	0.704034	NKAP_1	NKAP	0.0792405
FP013651	97	380.354	132.543	2.8697	0.005157	**	0.489248	BTBD10_2	BTBD10	0.0792418
FP015012	23	289.445	91.5896	3.1602	0.005153	**	0.586972	SLC2A3_1	SLC2A3	0.0792418
FP013386	17	380.845	115.066	3.3098	0.005161	**	0.662559	IFITM5_1	IFITM5	0.0792418
FP015613	14	44.0719	12.6684	3.4789	0.005159	**	0.723785	NXPH4_1	NXPH4	0.0792418
FP011825	60	192.678	66.133	2.9135	0.00519	**	0.48128	GRIN3A_1	GRIN3A	0.0796373
FP018743	28	5289.96	1720.58	3.0745	0.005195	**	0.706749	ZNF668_3	ZNF668	0.0796642
FP014890	24	9840.8	3137.82	3.1362	0.0052	**	0.379742	CACNA1C_2	CACNA1C	0.0796911
FP016164	12	1072.15	281.878	3.8036	0.00521	**	0.80245	SNRNP35_2	SNRNP35	0.0797946
FP023562	18	289.888	88.7841	3.2651	0.005219	**	0.644555	MRPL39_1	MRPL39	0.0798826
FP017969	19	236.744	72.5182	3.2646	0.005224	**	0.447766	SCAMP2_1	SCAMP2	0.0799093
FP014429	16	158.101	47.2059	3.3492	0.005229	**	0.680579	AQP11_1	AQP11	0.079936
FP014459	52	202.442	69.0464	2.932	0.005233	**	0.296286	DLG2_2	DLG2	0.0799473
FP017318	18	-5961.87	1806.3	-3.3006	0.005256	**	-0.661525	DICER1_2	DICER1	0.0801146
FP025030	18	208.825	64.0236	3.2617	0.005256	**	0.644163	H2BFWT_1	H2BFWT	0.0801146
FP010431	15	907.926	271.314	3.3464	0.005257	**	0.680276	DEFB104B_1	DEFB104B	0.0801146
FP013435	11	188.848	51.621	3.6583	0.005249	**	0.773251	AP2A2_1	AP2A2	0.0801146
FP023990	15	97.4611	28.112	3.4669	0.005269	**	0.816722	ZNRF3_1	ZNRF3	0.0802477
FP025451	13	376.761	106.16	3.549	0.005277	**	0.746612	TMLHE_1	TMLHE	0.0803197
FP020325	15	196.223	57.7363	3.3986	0.005283	**	0.700328	TEX14_1	TEX14	0.0803612
FP012873	13	177.971	50.1752	3.547	0.005295	**	0.746427	FAM213A_2	FAM213A	0.0804938
FP008362	54	267.184	91.3684	2.9243	0.005299	**	0.318629	HMGA1_2	HMGA1	0.0805048
FP006195	22	2730.8	867.702	3.1472	0.005306	**	0.14212	FRAS1_3	FRAS1	0.0805613
FP019361	12	62.3437	17.0776	3.6506	0.005312	**	0.772594	ZMYND15_1	ZMYND15	0.0806025
FP008857	24	187.22	59.8845	3.1264	0.005317	**	0.401849	FAM229B_1	FAM229B	0.0806286
FP004939	15	-1489.33	446.29	-3.3371	0.0053515	**	-0.679261	FRG2C_1	FRG2C	0.0811017
FP009258	11	350.655	88.235	3.9741	0.005364	**	0.832403	LFNG_3	LFNG	0.0812409
FP001185	18	-24388.6	7414.06	-3.2895	0.005373	**	-0.660271	CCDC18_2	CCDC18	0.0813271
FP010799	20	327.682	102.774	3.1884	0.00538	**	0.657123	UBXN2B_1	UBXN2B	0.0813829
FP002671	22	2776.49	878.085	3.162	0.005395	**	0.427697	GREB1_1	GREB1	0.0814592
FP015939	20	4863.05	1512.17	3.2159	0.005394	**	0.684604	SART3_2	SART3	0.0814592
FP013277	16	178.141	52.5827	3.3878	0.00539	**	0.699193	PLEKHA1_2	PLEKHA1	0.0814592
FP009558	22	6951.5	2198.78	3.1615	0.0054	**	0.696572	CCM2_3	CCM2	0.0814846
FP007540	21	187.309	58.8029	3.1854	0.005415	**	0.669986	YIPF5_1	YIPF5	0.0816057
FP010457	20	361.062	113.359	3.1851	0.005418	**	0.611338	MTMR9_1	MTMR9	0.0816057
FP000660	17	164.872	49.4965	3.331	0.005415	**	0.678586	FLJ11730_1	FLJ11730	0.0816057
FP021187	19	91.8336	28.5823	3.213	0.005428	**	0.626234	HMHA1_2	HMHA1	0.0817062
FP013741	6	939.014	69.5371	13.504	0.005439	**	0.994561	LGR4_1	LGR4	0.0818216
FP022265	17	363.7	110.802	3.2824	0.005449	**	0.659471	ZNF224_1	ZNF224	0.0818217
FP014581	15	435.921	128.883	3.3823	0.005445	**	0.698609	SLC35F2_1	SLC35F2	0.0818217
FP005370	14	3624.24	1051.07	3.4481	0.005446	**	0.720719	PLSCR4_2	PLSCR4	0.0818217
FP004504	15	196.889	58.2326	3.3811	0.005457	**	0.69848	ACAA1_1	ACAA1	0.0818917
FP007247	16	64.0355	19.2508	3.3264	0.005463	**	0.67808	TNFAIP8_1	TNFAIP8	0.0818966
FP018194	14	143.77	41.7173	3.4463	0.005464	**	0.730573	ALDH1A3_1	ALDH1A3	0.0818966
FP005808	18	253.334	77.2186	3.2807	0.005468	**	0.659278	MSANTD1_1	MSANTD1	0.0819066
FP003692	15	219.926	65.096	3.3785	0.005483	**	0.698206	PDK1_2	PDK1	0.0820812
FP004330	16	532.451	157.67	3.377	0.005499	**	0.698046	SLC6A11_1	SLC6A11	0.0822503
FP018337	14	156.138	45.3567	3.4424	0.005501	**	0.720146	ECI1_1	ECI1	0.0822503
FP003551	23	107.165	34.4487	3.1109	0.005508	**	0.571041	MMADHC_1	MMADHC	0.0823049
FP011166	20	12875.1	4018.76	3.2038	0.005534	**	0.625143	FAM135B_2	FAM135B	0.0826431
FP022677	20	1976.26	622.622	3.1741	0.005548	**	0.61001	LILRA3_1	LILRA3	0.0827107
FP021542	16	807.714	243.389	3.3186	0.005546	**	0.677223	TSPAN16_1	TSPAN16	0.0827107
FP012162	14	-1432.25	407.033	-3.5187	0.00555	**	-0.743777	FAM78A_2	FAM78A	0.0827107
FP014232	12	155.814	43.0151	3.6223	0.005552	**	0.770163	BBS1_1	BBS1	0.0827107
FP001604	13	323.108	94.0566	3.4353	0.005571	**	0.71942	LCE1E_1	LCE1E	0.0829434
FP005036	16	338.199	102.002	3.3156	0.005578	**	0.676892	DPPA2_1	DPPA2	0.0829767
FP002789	13	328.735	93.5102	3.5155	0.00558	**	0.74347	SLC30A3_2	SLC30A3	0.0829767
FP025089	14	190.53	55.503	3.4328	0.005596	**	0.71917	TRPC5_1	TRPC5	0.0831643
FP004269	92	1262.73	443.63	2.8464	0.005601	**	0.57238	CNTN6_2	CNTN6	0.0831882
FP023423	10	116.116	29.5015	3.9359	0.005633	**	0.829923	RBM38_1	RBM38	0.0836129
FP014433	22	303.324	96.5618	3.1412	0.005646	**	0.65328	AAMDC_1	AAMDC	0.0837047
FP001445	18	224.813	70.3823	3.1942	0.005646	**	0.727236	RBM8A_1	RBM8A	0.0837047
FP005553	20	236.626	74.7532	3.1654	0.005652	**	0.721731	DNAJC19_1	DNAJC19	0.0837431
FP012397	12	154.375	41.2282	3.7444	0.00567	**	0.304413	CELF2_2	CELF2	0.0839591
FP010584	13	373.065	108.948	3.4242	0.005681	**	0.718303	NKX3-1_1	NKX3-1	0.0840206
FP016541	13	170.407	48.619	3.5049	0.005679	**	0.74247	ABCC4_1	ABCC4	0.0840206
FP024040	16	167.272	51.3019	3.2605	0.005692	**	0.656973	OSBP2_2	OSBP2	0.0841326
FP004569	15	1448.68	431.498	3.3573	0.005702	**	0.680571	ANO10_1	ANO10	0.0841791
FP008786	15	-4504.46	1341.65	-3.3574	0.005702	**	-0.695961	HACE1_1	HACE1	0.0841791
FP012878	13	223.872	63.9529	3.5006	0.005721	**	0.742054	GHITM_1	GHITM	0.0844088
FP014840	12	111.238	30.8837	3.6018	0.005732	**	0.768383	APLP2_2	APLP2	0.0845203
FP020151	18	266.558	82.8469	3.2175	0.005754	**	0.639011	LRRC37A_1	LRRC37A	0.0846921
FP023515	14	285.77	81.709	3.4974	0.005751	**	0.741753	ARFRP1_2	ARFRP1	0.0846921
FP021189	10	133.365	35.7119	3.7345	0.005751	**	0.797167	HMHA1_4	HMHA1	0.0846921
FP001884	13	221.784	64.9161	3.4165	0.005759	**	0.717514	UFC1_1	UFC1	0.0847149
FP018698	11	1687.06	430.654	3.9174	0.005768	**	0.828704	SULT1A3_1	SULT1A3	0.0847965
FP003075	10	-529.953	142.005	-3.7319	0.005772	**	-0.796969	SNRNP27_1	SNRNP27	0.0848045
FP006679	22	266.935	85.2619	3.1308	0.005777	**	0.593766	TRAPPC11_2	TRAPPC11	0.0848272
FP009495	56	122.586	42.4351	2.8888	0.005787	**	0.55865	ELMO1_2	ELMO1	0.0848725
FP002723	13	103.526	29.632	3.4937	0.005787	**	0.741401	UBXN2A_1	UBXN2A	0.0848725
FP007655	20	250.599	79.4815	3.1529	0.005806	**	0.607446	CNOT8_3	CNOT8	0.0851004
FP015246	17	1817.05	551.702	3.2935	0.00582	**	0.674437	ABCD2_1	ABCD2	0.0852331
FP015587	15	242.806	72.5636	3.3461	0.005822	**	0.694752	SPRYD4_1	SPRYD4	0.0852331
FP019538	20	254.95	80.2087	3.1786	0.005834	**	0.622137	GAS7_2	GAS7	0.0852563
FP011692	19	138.432	43.5497	3.1787	0.005833	**	0.622152	SECISBP2_2	SECISBP2	0.0852563
FP022870	17	9477.74	2917.79	3.2483	0.005833	**	0.655563	FAM110A_2	FAM110A	0.0852563
FP016036	16	1758.65	534.24	3.2919	0.005838	**	0.62529	RBM19_1	RBM19	0.085264
FP024846	12	5431.63	1557.85	3.4866	0.005856	**	0.619705	OTUD6A_1	OTUD6A	0.085476
FP005931	27	153.825	50.1994	3.0643	0.005887	**	0.522856	SLC34A2_1	SLC34A2	0.0858264
FP003194	16	462.225	140.595	3.2876	0.005886	**	0.67378	CAPG_1	CAPG	0.0858264
FP004947	21	99.7744	31.971	3.1208	0.005905	**	0.592538	GBE1_1	GBE1	0.0859867
FP008840	20	275.764	87.6804	3.1451	0.005905	**	0.651757	SLC22A16_2	SLC22A16	0.0859867
FP007331	19	162.251	51.1497	3.1721	0.005915	**	0.621354	SHROOM1_1	SHROOM1	0.0860813
FP004616	15	446.394	133.795	3.3364	0.005928	**	0.693706	TDGF1_2	TDGF1	0.0862194
FP004741	33	150.002	50.5292	2.9686	0.005946	**	0.659358	CYB561D2_1	CYB561D2	0.0864294
FP024584	22	-20798.7	6672.5	-3.1171	0.005953	**	-0.592081	MAGEB4_1	MAGEB4	0.0864294
FP022902	11	196.875	53.0589	3.7105	0.005952	**	0.79529	ZNF343_1	ZNF343	0.0864294
FP018447	15	157.26	47.1761	3.3335	0.00596	**	0.693391	ABAT_1	ABAT	0.0864799
FP011521	23	116.149	37.785	3.0739	0.005988	**	0.454788	GBA2_2	GBA2	0.0867758
FP010836	16	84.6232	25.8072	3.2791	0.005984	**	0.672817	TCF24_1	TCF24	0.0867758
FP018655	10	328.057	84.3772	3.888	0.005991	**	0.826736	SPN_1	SPN	0.0867758
FP013806	63	-1693.63	593.281	-2.8547	0.0059972	**	-0.463595	EHF_1	EHF	0.0868144
FP015767	45	217.024	74.5641	2.9106	0.006003	**	0.333653	PPP1R12A_1	PPP1R12A	0.0868472
FP012780	19	260.546	82.3316	3.1646	0.006008	**	0.620453	CDH23_2	CDH23	0.0868672
FP013683	11	210.969	56.97	3.7031	0.006015	**	0.794709	ABCC8_1	ABCC8	0.0868672
FP004970	9	8380.08	1834.46	4.5682	0.006012	**	0.898171	MINA_1	MINA	0.0868672
FP021803	8	353.043	66.408	5.3163	0.006021	**	0.935958	CERS1_2	CERS1	0.0869027
FP007920	17	97.2517	30.0938	3.2316	0.006029	**	0.653641	FAM50B_1	FAM50B	0.0869671
FP022758	17	4770.13	1476.26	3.2312	0.006034	**	0.385323	NLRP11_1	NLRP11	0.0869725
FP020328	16	177.312	54.154	3.2743	0.00604	**	0.672278	TRIM37_1	TRIM37	0.0869725
FP006609	9	223.097	53.8147	4.1457	0.00604	**	0.860946	NAF1_1	NAF1	0.0869725
FP003794	32	136.307	45.7554	2.979	0.006048	**	0.535678	SLC40A1_1	SLC40A1	0.0870366
FP003805	15	229.278	68.9596	3.3248	0.006056	**	0.692454	C2orf88_3	C2orf88	0.0871007
FP014272	33	294.703	98.9683	2.9777	0.006067	**	0.516279	CABP4_1	CABP4	0.0871058
FP018587	19	119.713	37.8819	3.1602	0.006064	**	0.61992	SCNN1G_1	SCNN1G	0.0871058
FP002592	13	187.309	54.0406	3.4661	0.006061	**	0.442885	TRIM58_1	TRIM58	0.0871058
FP000570	13	138.602	40.9586	3.384	0.0061	**	0.714178	DCDC2B_1	DCDC2B	0.0875284
FP000965	23	4517.13	1473.79	3.065	0.006111	**	0.574931	OMA1_2	OMA1	0.087635
FP016521	18	197.824	62.0782	3.1867	0.006129	**	0.70437	EDNRB_3	EDNRB	0.0878418
FP013819	21	224.861	72.4698	3.1028	0.006141	**	0.590319	FJX1_1	FJX1	0.0879625
FP001497	50	88.6256	30.797	2.8777	0.006158	**	0.51126	HIST2H2AA3_1	HIST2H2AA3	0.0880948
FP001498	50	88.6256	30.797	2.8777	0.006158	**	0.51126	HIST2H2AA4_1	HIST2H2AA4	0.0880948
FP000963	16	333.467	102.167	3.2639	0.006161	**	0.671114	DAB1_2	DAB1	0.0880948
FP019354	17	299.34	92.9597	3.2201	0.006169	**	0.749228	SMTNL2_1	SMTNL2	0.0881578
FP009806	21	92.9738	29.4997	3.1517	0.006173	**	0.684907	PPP1R9A_1	PPP1R9A	0.0881637
FP010938	10	157.355	42.7154	3.6838	0.006185	**	0.793172	RIPK2_1	RIPK2	0.0882837
FP009165	20	7214.63	2310.75	3.1222	0.006202	**	0.60369	PLG_1	PLG	0.0884235
FP010000	18	200.684	62.3709	3.2176	0.0062	**	0.652012	BAP29_1	BAP29	0.0884235
FP023121	17	126.676	39.3788	3.2169	0.006209	**	0.651928	DNMT3B_1	DNMT3B	0.0884719
FP019748	20	221.766	71.0584	3.1209	0.00622	**	0.60353	TEFM_1	TEFM	0.0885773
FP012723	19	7552.58	2399.66	3.1474	0.00623	**	0.618369	HERC4_2	HERC4	0.0886682
FP019448	20	196.727	63.0675	3.1193	0.006241	**	0.317264	TNK1_1	TNK1	0.0887733
FP008863	24	155.608	50.9392	3.0548	0.006254	**	0.744765	HDAC2_1	HDAC2	0.0888148
FP014413	23	295.693	96.2162	3.0732	0.006258	**	0.693732	C11orf30_2	C11orf30	0.0888148
FP017516	23	73.722	24.1383	3.0542	0.006262	**	0.645025	ACTC_1	ACTC	0.0888148
FP008670	18	856.939	269.748	3.1768	0.006254	**	0.634195	KHDC1L_1	KHDC1L	0.0888148
FP008984	13	2610.06	774.668	3.3693	0.00626	**	0.712652	HBS1L_3	HBS1L	0.0888148
FP004082	15	226.03	68.3827	3.3054	0.006278	**	0.690337	SERPINE2_1	SERPINE2	0.0889673
FP012433	12	-419.346	118.343	-3.5435	0.00628	**	-0.763211	MEIG1_1	MEIG1	0.0889673
FP015782	16	2180.81	670.264	3.2537	0.006284	**	0.669951	TSPAN19_1	TSPAN19	0.0889726
FP014165	14	220.244	65.4283	3.3662	0.006295	**	0.712332	TIGD3_1	TIGD3	0.089077
FP017052	22	6745.55	2182.69	3.0905	0.006309	**	0.457465	PLEKHG3_2	PLEKHG3	0.0892237
FP000697	14	261.329	77.7072	3.363	0.00633	**	0.711999	PPIE_1	PPIE	0.08946
FP024182	14	45.5585	13.5479	3.3628	0.006333	**	0.711976	DMC1_1	DMC1	0.08946
FP002343	18	6386.21	1991.86	3.2061	0.006342	**	0.650676	FAM71A_1	FAM71A	0.0895124
FP017392	18	1888.38	589.012	3.206	0.006344	**	0.650659	MARK3_2	MARK3	0.0895124
FP009252	12	304.11	85.9958	3.5363	0.006351	**	0.692125	SNX8_1	SNX8	0.0895597
FP005040	75	355.761	126.268	2.8175	0.006355	**	0.366967	CD96_1	CD96	0.0895646
FP005457	21	251.674	81.5388	3.0866	0.006364	**	0.588297	LXN_1	LXN	0.08964
FP001591	22	4760.73	1542.98	3.0854	0.00638	**	0.588154	FLG2_1	FLG2	0.0898139
FP022284	14	469.672	139.856	3.3583	0.006384	**	0.711503	CBLC_1	CBLC	0.0898187
FP022874	17	200.834	61.9268	3.2431	0.006413	**	0.668747	PSMF1_1	PSMF1	0.090175
FP017843	6	444.284	85.0867	5.2215	0.006421	**	0.933841	IGDCC4_1	IGDCC4	0.0902358
FP001292	18	449.087	141.956	3.1636	0.006425	**	0.632611	CSF1_1	CSF1	0.0902404
FP020844	21	112.817	36.3373	3.1047	0.006439	**	0.174895	GREB1L_1	GREB1L	0.0903853
FP011674	16	62.7842	19.0791	3.2907	0.006451	**	0.688732	ZCCHC6_1	ZCCHC6	0.090502
FP014559	21	363.213	117.989	3.0784	0.006479	**	0.587273	DCUN1D5_1	DCUN1D5	0.0908429
FP021799	21	92.9155	29.9651	3.1008	0.006494	**	0.601049	CRTC1_1	CRTC1	0.0909633
FP024272	18	189.588	60.028	3.1583	0.006495	**	0.735981	CYB5R3_2	CYB5R3	0.0909633
FP007606	26	308.903	102.808	3.0047	0.006524	**	0.614179	SYNPO_1	SYNPO	0.0910578
FP007670	19	2685.69	850.673	3.1571	0.006511	**	0.631838	CYFIP2_3	CYFIP2	0.0910578
FP021762	17	11048.1	3414.56	3.2356	0.006506	**	0.667892	SLC5A5_1	SLC5A5	0.0910578
FP022408	16	3890.11	1202.63	3.2347	0.006518	**	0.667786	CARD8_5	CARD8	0.0910578
FP020820	11	120.986	33.1741	3.647	0.006522	**	0.790206	AFG3L2_1	AFG3L2	0.0910578
FP016163	10	360.062	94.1728	3.8234	0.006513	**	0.822316	SNRNP35_1	SNRNP35	0.0910578
FP013228	18	106.073	33.6149	3.1555	0.006532	**	0.661664	C10orf82_1	C10orf82	0.0911177
FP010910	19	200.029	64.0214	3.1244	0.006537	**	0.615572	IMPA1_1	IMPA1	0.0911357
FP022467	17	105.585	32.6612	3.2327	0.006542	**	0.667566	LIN7B_1	LIN7B	0.0911536
FP023882	22	138.232	44.9751	3.0735	0.006547	**	0.58667	RTN4R_2	RTN4R	0.0911715
FP001169	20	100.736	32.5376	3.096	0.006561	**	0.600455	GLMN_1	GLMN	0.0912113
FP023441	19	73.8732	23.6562	3.1228	0.006559	**	0.615373	GNAS_3	GNAS	0.0912113
FP004054	17	1600.49	501.825	3.1893	0.006558	**	0.42499	DNPEP_1	DNPEP	0.0912113
FP023246	12	160.641	45.7141	3.514	0.006577	**	0.720257	EMILIN3_1	EMILIN3	0.091382
FP008181	15	285.347	87.0193	3.2791	0.006591	**	0.687451	FLOT1_1	FLOT1	0.0914213
FP014859	15	682.089	207.994	3.2794	0.006588	**	0.687479	ACAD8_1	ACAD8	0.0914213
FP013483	10	213.621	55.9985	3.8148	0.006587	**	0.821712	KCNQ1_2	KCNQ1	0.0914213
FP025222	15	230.636	70.3697	3.2775	0.006611	**	0.687271	HPRT1_1	HPRT1	0.0916469
FP008093	20	328.54	105.347	3.1186	0.006616	**	0.721881	HIST1H2BK_1	HIST1H2BK	0.0916645
FP006213	21	224.577	72.6881	3.0896	0.006651	**	0.599661	HNRNPD_1	HNRNPD	0.0920974
FP017814	15	204.687	62.5267	3.2736	0.006659	**	0.686839	PPIB_1	PPIB	0.0921458
FP001145	9	2156.11	566.498	3.806	0.006662	**	0.8211	GBP4_1	GBP4	0.0921458
FP022528	21	107.069	34.6716	3.0881	0.006673	**	0.599473	POLD1_1	POLD1	0.092194
FP020348	18	1688.97	536.987	3.1453	0.006671	**	0.630409	C17orf64_1	C17orf64	0.092194
FP012932	4	5472.23	449.525	12.173	0.006681	**	0.9928	IFIT1_1	IFIT1	0.0922527
FP009522	21	89.1369	29.0945	3.0637	0.006689	**	0.585438	MRPS24_1	MRPS24	0.0922593
FP000292	13	1077.86	323.488	3.332	0.006688	**	0.768389	PADI3_1	PADI3	0.0922593
FP009206	18	144.539	45.9806	3.1435	0.006695	**	0.810177	DLL1_1	DLL1	0.0922798
FP021836	14	132.536	39.7875	3.3311	0.006698	**	0.018472	LPAR2_2	LPAR2	0.0922798
FP020973	16	143.361	44.5201	3.2201	0.006703	**	0.780428	HDHD2_1	HDHD2	0.0922969
FP010280	8	-229.981	51.6896	-4.4493	0.006707	**	-0.893507	ARHGEF5_1	ARHGEF5	0.0923002
FP024443	17	183.814	57.8617	3.1768	0.006724	**	0.69195	KAL1_1	KAL1	0.0924823
FP007259	67	135.57	48.265	2.8089	0.006732	**	0.585573	LOX_1	LOX	0.0924887
FP000962	10	-56798.2	15666.5	-3.6254	0.006729	**	-0.788442	DAB1_3	DAB1	0.0924887
FP023775	17	891.838	280.821	3.1758	0.006737	**	0.731947	TRPM2_3	TRPM2	0.0925056
FP017478	16	90.2509	28.0537	3.2171	0.006742	**	0.665767	NDNL2_1	NDNL2	0.0925226
FP012807	60	788.759	280.284	2.8141	0.006809	**	0.436755	TTC18_2	TTC18	0.0932856
FP014123	19	-1267.67	408.258	-3.1051	0.006807	**	-0.518773	SLC22A11_1	SLC22A11	0.0932856
FP013363	8	443.525	86.3376	5.1371	0.006805	**	0.860439	PRAP1_1	PRAP1	0.0932856
FP022637	19	114.788	36.9834	3.1038	0.006826	**	0.613037	ZNF765_1	ZNF765	0.0933512
FP012594	16	99.7554	31.0674	3.2109	0.006822	**	0.665058	CXCL12_1	CXCL12	0.0933512
FP023942	16	99.2269	30.4379	3.26	0.006829	**	0.685325	DDT_1	DDT	0.0933512
FP004666	15	96.8901	29.7163	3.2605	0.006822	**	0.685385	UQCRC1_1	UQCRC1	0.0933512
FP018940	9	1236.59	306.403	4.0358	0.006835	**	0.854866	CES3_1	CES3	0.0933812
FP000066	12	142.407	40.8145	3.4891	0.006839	**	0.758256	TMEM52_1	TMEM52	0.0933839
FP009638	27	220.005	73.7335	2.9838	0.006847	**	0.536744	CALN1_1	CALN1	0.0933893
FP003354	21	313.938	102.052	3.0763	0.006844	**	0.597998	FHL2_1	FHL2	0.0933893
FP008307	13	-9083.49	2739.14	-3.3162	0.006878	**	-0.707059	HLA-DQA2_1	HLA-DQA2	0.09376
FP007968	21	70.2668	22.8655	3.073	0.006891	**	0.597598	TMEM170B_1	TMEM170B	0.0938603
FP017533	19	268.163	85.6965	3.1292	0.006893	**	0.710094	THBS1_1	THBS1	0.0938603
FP001590	40	322.901	112.913	2.8597	0.006929	**	0.381344	FLG_1	FLG	0.0942459
FP014111	11	105.376	29.2268	3.6055	0.006927	**	0.786789	PLCB3_1	PLCB3	0.0942459
FP004792	28	171.24	58.1999	2.9423	0.006933	**	0.680167	NISCH_2	NISCH	0.0942481
FP007743	14	185.133	55.9092	3.3113	0.006937	**	0.70654	EFCAB9_1	EFCAB9	0.0942503
FP015562	21	171.021	55.7313	3.0687	0.006956	**	0.687122	ZC3H10_1	ZC3H10	0.0942997
FP021493	20	202.516	65.4354	3.0949	0.006954	**	0.119919	ICAM1_1	ICAM1	0.0942997
FP007548	19	287.376	91.9591	3.125	0.006952	**	0.685072	LARS_1	LARS	0.0942997
FP022592	12	17848.3	5273.82	3.3843	0.006952	**	0.73067	FPR3_1	FPR3	0.0942997
FP012059	18	194.54	62.2795	3.1237	0.006972	**	0.627787	ENG_2	ENG	0.0944644
FP021916	17	153.964	48.1437	3.198	0.006994	**	0.66356	PEPD_1	PEPD	0.0947103
FP007740	84	227.593	82.0884	2.7725	0.007012	**	0.357793	FBXW11_2	FBXW11	0.0948144
FP013959	36	622.92	215.192	2.8947	0.007011	**	0.582539	LPXN_2	LPXN	0.0948144
FP024168	28	101.52	34.5656	2.937	0.007021	**	0.544461	PLA2G6_1	PLA2G6	0.0948144
FP008708	19	296.279	95.8735	3.0903	0.007021	**	0.693674	UBE3D_1	UBE3D	0.0948144
FP015153	10	4105.17	1141.36	3.5967	0.007015	**	0.786062	PYROXD1_1	PYROXD1	0.0948144
FP000536	36	3934.15	1362.95	2.8865	0.007036	**	0.456183	PUM1_3	PUM1	0.0949125
FP014765	34	161.54	55.6895	2.9007	0.007034	**	0.56835	GRAMD1B_1	GRAMD1B	0.0949125
FP009421	15	112.072	34.5588	3.2429	0.007048	**	0.683418	HIBADH_1	HIBADH	0.0950222
FP020496	14	400.966	121.445	3.3016	0.007057	**	0.705504	RAB37_2	RAB37	0.0950913
FP017595	24	216.271	72.0885	3.0001	0.007075	**	0.707119	EHD4_1	EHD4	0.0952816
FP007750	15	775.771	239.429	3.2401	0.007085	**	0.683099	ERGIC1_2	ERGIC1	0.0953639
FP013242	23	796.146	263.938	3.0164	0.007099	**	0.67212	EIF3A_3	EIF3A	0.0954612
FP009349	9	1390.71	370.138	3.7573	0.0071	**	0.750102	PRPS1L1_1	PRPS1L1	0.0954612
FP001360	15	3495.57	1061.81	3.2921	0.007178	**	0.704476	HIPK1_3	HIPK1	0.0964177
FP021169	12	292.124	86.808	3.3652	0.007179	**	0.728735	AZU1_1	AZU1	0.0964177
FP000093	10	104.116	29.0793	3.5804	0.007184	**	0.784692	MEGF6_1	MEGF6	0.0964321
FP024257	20	197.138	64.6219	3.0506	0.007229	**	0.594785	CENPM_1	CENPM	0.0969302
FP002060	14	133.141	41.2262	3.2295	0.007226	**	0.681907	NPHS2_1	NPHS2	0.0969302
FP013638	20	251.339	82.4297	3.0491	0.007253	**	0.647427	DKK3_1	DKK3	0.0969871
FP015659	19	138.097	44.4855	3.1043	0.007253	**	0.625423	CTDSP2_1	CTDSP2	0.0969871
FP023874	17	224.277	71.4366	3.1395	0.007241	**	0.642777	ARVCF_1	ARVCF	0.0969871
FP019815	8	889.774	203.812	4.3657	0.007252	**	0.743259	RDM1_1	RDM1	0.0969871
FP013355	6	286.351	56.7488	5.0459	0.007252	**	0.929639	UTF1_1	UTF1	0.0969871
FP016343	30	-421.301	144.651	-2.9125	0.00727	**	-0.392739	NBEA_4	NBEA	0.0971087
FP002375	11	379.289	109.917	3.4507	0.007267	**	0.754672	BPNT1_1	BPNT1	0.0971087
FP006983	21	493.064	163.027	3.0244	0.007287	**	0.561786	CENPK_1	CENPK	0.0972828
FP011252	5	304.364	46.5979	6.5317	0.007293	**	0.949778	GPAA1_1	GPAA1	0.09731
FP022404	17	4354.6	1371.4	3.1753	0.007307	**	0.557409	ELSPBP1_1	ELSPBP1	0.0974439
FP000361	18	256.227	82.7145	3.0977	0.007351	**	0.298239	ALPL_2	ALPL	0.097858
FP011298	16	127.708	40.7788	3.1317	0.007354	**	0.749568	DOCK8_1	DOCK8	0.097858
FP012381	14	132.771	41.225	3.2207	0.007346	**	0.505022	RBM17_1	RBM17	0.097858
FP002533	10	389.005	109.12	3.5649	0.007348	**	0.627454	LGALS8_2	LGALS8	0.097858
FP018117	14	228.842	71.0777	3.2196	0.00736	**	0.680786	MFGE8_1	MFGE8	0.0978848
FP004243	13	101.323	29.4359	3.4421	0.007365	**	0.753865	PPP1R7_1	PPP1R7	0.0978983
FP013927	15	-3501.99	1088.38	-3.2176	0.007387	**	-0.680561	TRIM51_1	TRIM51	0.0980845
FP000772	11	448.905	126.041	3.5616	0.007384	**	0.783098	ELOVL1_2	ELOVL1	0.0980845
FP019923	16	157.145	48.8521	3.2168	0.007399	**	0.680461	RAPGEFL1_2	RAPGEFL1	0.0981377
FP001963	14	67.4191	20.1409	3.3474	0.007398	**	0.726919	GPR161_3	GPR161	0.0981377
FP000924	23	108.687	36.2636	2.9971	0.007409	**	0.56658	MAGOH_1	MAGOH	0.0981908
FP004001	21	7336.67	2432.03	3.0167	0.007411	**	0.579485	CXCR2_1	CXCR2	0.0981908
FP003388	17	66.4779	21.2627	3.1265	0.007431	**	0.645016	BCL2L11_1	BCL2L11	0.0984026
FP025401	31	227.44	78.8126	2.8858	0.007436	**	0.602736	MECP2_1	MECP2	0.0984158
FP017544	21	4610.44	1518.4	3.0364	0.007453	**	0.592983	BUB1B_2	BUB1B	0.0985876
FP006958	27	191.134	64.8639	2.9467	0.00746	**	0.349544	PDE4D_5	PDE4D	0.0986271
FP024988	52	336.802	120.445	2.7963	0.007519	**	0.551781	ARMCX2_1	ARMCX2	0.0991797
FP020963	26	73.3852	24.9323	2.9434	0.007517	**	0.53154	RNF165_1	RNF165	0.0991797
FP023820	20	-926.966	305.634	-3.0329	0.007508	**	-0.592547	C21orf58_2	C21orf58	0.0991797
FP024131	16	294.015	93.0362	3.1602	0.007522	**	0.659139	TMPRSS6_2	TMPRSS6	0.0991797
FP017264	11	271.394	79.146	3.429	0.00752	**	0.796416	TC2N_2	TC2N	0.0991797
FP016468	20	15306	5048.98	3.0315	0.007531	**	0.592366	ATP7B_2	ATP7B	0.0992451
FP013726	57	260.954	93.8009	2.782	0.007554	**	0.293493	GAS2_1	GAS2	0.0994795
FP002132	44	265.479	94.234	2.8172	0.007565	**	0.489858	UCHL5_2	UCHL5	0.0994795
FP007585	21	269.533	89.6273	3.0073	0.007565	**	0.578282	PPARGC1B_2	PPARGC1B	0.0994795
FP002374	17	162.532	52.1281	3.1179	0.007558	**	0.64017	EPRS_1	EPRS	0.0994795
FP022115	28	288.697	99.019	2.9156	0.007577	**	0.634072	DYRK1B_1	DYRK1B	0.099584
FP012230	12	219.841	65.9717	3.3324	0.007588	**	0.725376	PAEP_1	PAEP	0.0996613
FP009269	7	64.6672	12.9824	4.9811	0.007591	**	0.927991	SDK1_1	SDK1	0.0996613
FP008942	22	9831.88	3293.5	2.9852	0.007606	**	0.67531	SAMD3_2	SAMD3	0.0998049
FP021054	12	151.403	44.2596	3.4208	0.007618	**	0.751835	GRP_1	GRP	0.0999089
FP008573	25	106.231	36.1696	2.937	0.007628	**	0.653026	CD2AP_1	CD2AP	0.0999867
FP007472	28	713.866	245.123	2.9123	0.007636	**	0.532269	PCDHB2_1	PCDHB2	0.100038
FP011780	19	129.381	42.0279	3.0784	0.007646	**	0.622235	FOXE1_1	FOXE1	0.100116
FP019993	23	288.363	96.6983	2.9821	0.007659	**	0.58988	GAS_1	GAS	0.100126
FP009420	19	16530.1	5370.06	3.0782	0.007651	**	0.622202	HIBADH_2	HIBADH	0.100126
FP022617	12	375.281	112.806	3.3268	0.007659	**	0.724799	ZNF83_3	ZNF83	0.100126
FP018235	12	120.233	35.201	3.4156	0.007681	**	0.751339	RAB40C_1	RAB40C	0.10036
FP013908	29	4106.29	1421.79	2.8881	0.007709	**	0.501748	CELF1_2	CELF1	0.100471
FP017844	20	287.876	94.5188	3.0457	0.007708	**	0.605802	DPP8_4	DPP8	0.100471
FP023203	20	175.064	57.959	3.0205	0.00771	**	0.59097	DSN1_1	DSN1	0.100471
FP006612	15	196.129	61.3903	3.1948	0.007707	**	0.554951	TMA16_1	TMA16	0.100471
FP019103	15	246.083	77.0059	3.1956	0.007695	**	0.678052	FA2H_1	FA2H	0.100471
FP016084	18	123.78	40.6534	3.0448	0.007723	**	0.605683	COQ5_1	COQ5	0.100587
FP018416	13	6183.45	1902.54	3.2501	0.007734	**	0.699908	HMOX2_3	HMOX2	0.100677
FP006680	36	224.844	78.767	2.8545	0.007744	**	0.61146	STOX2_1	STOX2	0.100753
FP023703	13	198.949	59.9246	3.32	0.007748	**	0.724097	BRWD1_1	BRWD1	0.100753
FP007255	15	388.537	121.755	3.1911	0.007759	**	0.677537	SRFBP1_1	SRFBP1	0.100842
FP016253	12	328.565	99.0208	3.3181	0.007772	**	0.723904	ZDHHC20_1	ZDHHC20	0.100958
FP005208	16	125.635	39.9739	3.1429	0.007777	**	0.7734	KBTBD12_1	KBTBD12	0.100969
FP021259	18	104.364	34.004	3.0692	0.007793	**	0.621085	THOP1_2	THOP1	0.101041
FP009417	16	108.902	35.1009	3.1025	0.007793	**	0.616539	HOXA13_1	HOXA13	0.101041
FP018438	15	211.2	66.2405	3.1884	0.007799	**	0.67722	C16orf89_1	C16orf89	0.101041
FP000507	14	313.095	94.414	3.3162	0.007798	**	0.723701	EYA3_1	EYA3	0.101041
FP020324	25	964.124	327.876	2.9405	0.007812	**	0.702422	C17orf47_1	C17orf47	0.101156
FP021005	26	134.399	45.9308	2.9261	0.007822	**	0.512604	SMAD4_1	SMAD4	0.101232
FP006646	24	154.524	52.0139	2.9708	0.007852	**	0.755493	GALNT7_1	GALNT7	0.101567
FP009512	41	719.585	256.118	2.8096	0.00788	**	0.475206	INHBA_2	INHBA	0.101876
FP020440	5	210.935	33.2422	6.3454	0.007917	**	0.964706	C17orf58_1	C17orf58	0.1023
FP025250	24	253.796	86.9369	2.9193	0.007945	**	0.667795	FHL1_3	FHL1	0.102339
FP020114	22	99.0512	33.1761	2.9856	0.007929	**	0.575501	CCDC43_1	CCDC43	0.102339
FP016665	20	4296.1	1428.43	3.0076	0.007926	**	0.70855	OR4K15_1	OR4K15	0.102339
FP007369	18	397.082	128.386	3.0929	0.007944	**	0.637119	H2AFY_2	H2AFY	0.102339
FP005188	17	233.494	75.4837	3.0933	0.007937	**	-0.11721	SLC41A3_1	SLC41A3	0.102339
FP014688	15	1192.62	368.578	3.2357	0.007934	**	0.698325	SCN2B_1	SCN2B	0.102339
FP006048	53	167.526	60.3863	2.7742	0.007969	**	0.489891	GSX2_1	GSX2	0.102405
FP019073	21	2250.03	759.097	2.9641	0.00797	**	0.606534	CHST4_2	CHST4	0.102405
FP004463	20	6624.28	2204.49	3.0049	0.007971	**	0.654843	CNOT10_2	CNOT10	0.102405
FP016605	19	94.8209	31.5509	3.0053	0.007964	**	0.589031	COL4A2_1	COL4A2	0.102405
FP018294	17	230.779	74.651	3.0914	0.007967	**	0.636944	HN1L_1	HN1L	0.102405
FP009745	15	89.9453	28.322	3.1758	0.007983	**	0.675769	ABCB4_1	ABCB4	0.102506
FP008717	33	85.0178	29.6973	2.8628	0.00802	**	0.657293	SNAP91_2	SNAP91	0.102873
FP024151	10	405.751	115.756	3.5052	0.008017	**	0.778238	NOL12_1	NOL12	0.102873
FP001192	19	152.176	50.2889	3.026	0.008031	**	0.603317	DNTTIP2_1	DNTTIP2	0.10296
FP019453	21	211.959	71.162	2.9785	0.008052	**	0.630059	C17orf74_1	C17orf74	0.103176
FP010233	30	96.4767	33.5265	2.8776	0.008086	**	0.621998	TMEM178B_1	TMEM178B	0.103459
FP011413	17	6953.1	2254.79	3.0837	0.00809	**	0.682287	IFNA6_2	IFNA6	0.103459
FP000702	15	81.5337	25.2839	3.2247	0.008091	**	0.697104	MYCL_1	MYCL	0.103459
FP021400	15	1419.05	447.835	3.1687	0.008089	**	0.674945	CTD-2207O23.3_1	CTD-2207O23.3	0.103459
FP023604	10	13546.3	3873.14	3.4975	0.008109	**	0.777558	KRTAP21-2_1	KRTAP21-2	0.103636
FP010510	23	103.478	35.0157	2.9552	0.008128	**	0.56116	PCM1_1	PCM1	0.103673
FP010197	22	1252.47	423.847	2.955	0.008132	**	0.668858	CREB3L2_1	CREB3L2	0.103673
FP021415	20	261.418	87.2563	2.996	0.008124	**	0.284335	PCP2_2	PCP2	0.103673
FP014174	16	167.75	53.7722	3.1196	0.008133	**	0.779844	FAM89B_1	FAM89B	0.103673
FP010374	13	125.688	39.0079	3.2221	0.008129	**	0.757685	INSIG1_1	INSIG1	0.103673
FP019211	12	150.361	44.4985	3.379	0.00814	**	0.747801	APRT_1	APRT	0.103708
FP020448	17	111.35	36.1526	3.08	0.00815	**	0.635538	PRKAR1A_1	PRKAR1A	0.103781
FP021647	21	456.309	152.428	2.9936	0.008165	**	0.587527	PALM3_1	PALM3	0.103836
FP011414	17	6971.32	2263.95	3.0793	0.008162	**	0.667738	IFNA6_1	IFNA6	0.103836
FP010294	16	101.47	32.5484	3.1175	0.008167	**	0.654056	ZNF398_3	ZNF398	0.103836
FP023125	17	20489.5	6657	3.0779	0.008184	**	0.784266	SUN5_1	SUN5	0.103999
FP015341	17	91.5749	29.7555	3.0776	0.008189	**	0.635242	TROAP_1	TROAP	0.104008
FP007650	22	142.706	48.0445	2.9703	0.008198	**	0.611618	LARP1_3	LARP1	0.104069
FP018258	10	4815.93	1320.36	3.6474	0.008206	**	0.809466	RPUSD1_2	RPUSD1	0.104117
FP018390	12	20537	6089.26	3.3727	0.008222	**	0.74718	MTRNR2L4_1	MTRNR2L4	0.104266
FP000347	18	3388.44	1113.97	3.0418	0.00824	**	0.617661	HP1BP3_4	HP1BP3	0.104386
FP006273	15	-227.882	72.1396	-3.1589	0.008238	**	-0.673808	HERC5_1	HERC5	0.104386
FP003659	16	191.296	62.2419	3.0734	0.008257	**	0.634731	SSB_1	SSB	0.104548
FP004452	63	90.2553	32.9903	2.7358	0.008281	**	0.587298	STT3B_1	STT3B	0.104797
FP013840	21	91.0109	30.4734	2.9866	0.008289	**	0.586622	ACCS_1	ACCS	0.104803
FP016125	20	252.093	84.4105	2.9865	0.00829	**	0.586615	LRRC43_3	LRRC43	0.104803
FP015051	15	6576.36	2050.64	3.207	0.00835	**	0.695125	KLRD1_1	KLRD1	0.105507
FP007235	20	166.753	55.9175	2.9821	0.008368	**	0.658989	CDO1_1	CDO1	0.10568
FP023951	20	246.442	82.6556	2.9816	0.008378	**	0.50512	ADORA2A_2	ADORA2A	0.105752
FP008409	21	215.318	72.7779	2.9586	0.008409	**	0.632318	CDKN1A_3	CDKN1A	0.106089
FP021545	11	-374.568	111.571	-3.3572	0.008427	**	-0.745663	CCDC159_1	CCDC159	0.106262
FP016849	17	259.556	83.7315	3.0999	0.008449	**	0.554194	ARHGAP5_1	ARHGAP5	0.10643
FP012872	15	245.574	78.0732	3.1454	0.008446	**	0.70553	FAM213A_1	FAM213A	0.10643
FP024819	21	466.783	156.806	2.9768	0.008463	**	0.632803	ARHGEF9_1	ARHGEF9	0.106551
FP014536	21	1363.49	461.397	2.9551	0.008472	**	0.571551	PGR_1	PGR	0.10661
FP009327	28	220.087	76.1266	2.8911	0.008477	**	0.651612	ARL4_2	ARL4	0.106618
FP003874	13	385.741	118.114	3.2658	0.00849	**	0.718407	ORC2_1	ORC2	0.106727
FP020987	17	150.995	48.7606	3.0967	0.008501	**	0.686472	C18orf32_1	C18orf32	0.106811
FP001892	23	148.932	51.0418	2.9178	0.008508	**	0.771858	NDUFS2_3	NDUFS2	0.106844
FP010794	19	1403.54	468.273	2.9973	0.008528	**	0.599652	SDR16C5_1	SDR16C5	0.10704
FP020471	21	204.206	68.6946	2.9727	0.008538	**	0.688346	FAM104A_1	FAM104A	0.107094
FP011281	10	133.326	36.8582	3.6173	0.008541	**	0.80714	LRRC14_1	LRRC14	0.107094
FP001687	12	256.214	76.5448	3.3472	0.008561	**	0.7931	ADAR_2	ADAR	0.10729
FP016635	16	2090.12	675.875	3.0925	0.00857	**	0.651034	CUL4A_2	CUL4A	0.107348
FP007937	25	95.6316	33.1366	2.886	0.008577	**	0.523899	RREB1_1	RREB1	0.107381
FP003049	34	161.945	57.5942	2.8118	0.0086	**	0.653128	SPRED2_1	SPRED2	0.107614
FP001959	43	156.023	56.1377	2.7793	0.008605	**	0.482008	DCAF6_1	DCAF6	0.107622
FP011070	103	87.6937	32.6841	2.6831	0.008635	**	0.427056	DC6_1	DC6	0.107723
FP019548	33	335.426	119.067	2.8171	0.008632	**	0.0570961	PIRT_1	PIRT	0.107723
FP007236	30	137.816	48.513	2.8408	0.008631	**	0.656063	APG12L_1	APG12L	0.107723
FP003684	25	236.469	81.6235	2.8971	0.008622	**	0.492863	HAT1_1	HAT1	0.107723
FP017674	18	196.779	65.1641	3.0197	0.008619	**	0.614882	C15orf48_1	C15orf48	0.107723
FP004079	8	461.919	110.486	4.1808	0.008648	**	0.8818	MRPL44_1	MRPL44	0.10783
FP009614	19	128.155	42.8697	2.9894	0.008669	**	0.734686	ZNF107_1	ZNF107	0.108037
FP015429	25	929.689	321.359	2.893	0.008702	**	0.686454	KRT5_1	KRT5	0.10835
FP022045	20	117.636	39.6936	2.9636	0.008704	**	0.583651	ZNF607_2	ZNF607	0.10835
FP007727	19	194.706	65.1938	2.9866	0.00872	**	0.698385	SPDL1_1	SPDL1	0.10835
FP015193	16	1808.23	577.955	3.1287	0.008714	**	0.670262	C12orf71_1	C12orf71	0.10835
FP023190	15	207.797	66.4329	3.1279	0.008725	**	0.670175	EPB41L1_2	EPB41L1	0.10835
FP014224	14	167.106	53.405	3.129	0.008708	**	0.670306	SLC29A2_2	SLC29A2	0.10835
FP021247	7	422.966	101.386	4.1718	0.008724	**	0.838431	C19orf35_1	C19orf35	0.10835
FP022640	10	75.1371	21.8091	3.4452	0.008756	**	0.7729	ZNF331_2	ZNF331	0.10868
FP006301	10	125.873	34.9935	3.597	0.008775	**	0.805557	BMPR1B_1	BMPR1B	0.108861
FP016104	25	185.413	64.184	2.8888	0.008785	**	0.603686	KDM2B_6	KDM2B	0.10893
FP005732	8	322.017	84.3635	3.817	0.008791	**	0.841611	ZNF721_2	ZNF721	0.108949
FP016484	73	324.197	119.976	2.7022	0.008809	**	0.439453	PCDH17_1	PCDH17	0.109117
FP000421	15	93.339	29.9048	3.1212	0.008835	**	0.669382	CLIC4_1	CLIC4	0.109329
FP000312	13	302.241	93.213	3.2425	0.008832	**	0.393152	AKR7A2_1	AKR7A2	0.109329
FP001862	36	313.423	112.663	2.7819	0.008865	**	0.488484	NCSTN_1	NCSTN	0.109623
FP019784	28	77.9826	27.3893	2.8472	0.008896	**	0.66908	ZNF830_1	ZNF830	0.109623
FP020925	28	522.452	184.071	2.8383	0.008873	**	0.669096	ZNF24_1	ZNF24	0.109623
FP018104	22	-1564.21	533.31	-2.933	0.0088876	**	-0.568661	AGBL1_1	AGBL1	0.109623
FP000561	21	109.308	36.7153	2.9772	0.008893	**	0.589481	KHDRBS1_1	KHDRBS1	0.109623
FP024461	18	255.463	85.04	3.004	0.008899	**	-0.0817033	HCCS_1	HCCS	0.109623
FP001008	17	293.617	96.6869	3.0368	0.00888	**	0.630179	JAK1_1	JAK1	0.109623
FP009940	14	377.027	118.824	3.173	0.008871	**	0.772203	SH2B2_1	SH2B2	0.109623
FP010134	4	291.083	27.6413	10.531	0.008897	**	0.991103	SMKR1_1	SMKR1	0.109623
FP015695	25	-2037.82	707.011	-2.8823	0.008915	**	-0.728912	GRIP1_2	GRIP1	0.109688
FP007436	21	5910.77	2002.96	2.951	0.00894	**	0.647979	ANKHD1_4	ANKHD1	0.109688
FP016917	15	320.833	101.235	3.1692	0.008931	**	0.690856	ARF6_1	ARF6	0.109688
FP005532	12	152.289	45.8561	3.321	0.008926	**	0.742061	ZMAT3_1	ZMAT3	0.109688
FP009642	12	3478.14	1046.98	3.3221	0.008911	**	0.742168	TRIM74_1	TRIM74	0.109688
FP009643	12	3551.74	1069.32	3.3215	0.008919	**	0.742109	FKBP6_1	FKBP6	0.109688
[truncated: 22,552 more rows]

## Sheet: Mammals q>0.05
epdid	speciescount	estimate	stderr	t.value	p.value	stars	pearsoncorrelation	geneid	geneidnameonly	adjust
FP012506	20	302.894	32.3944	9.3502	4.107e-08	***	0.865057	ACBD5_2	ACBD5	0.000504155
FP008738	22	391.221	43.6368	8.9654	2.965e-08	***	0.899339	ORC3_1	ORC3	0.000504155
FP015579	28	1449.31	192.948	7.5114	1.243e-07	***	0.842854	PAN2_3	PAN2	0.000508615
FP014005	25	220.551	27.8209	7.9275	9.526e-08	***	0.865759	DDB1_1	DDB1	0.000508615
FP018129	22	287.487	33.9629	8.4648	1.087e-07	***	0.893993	WDR93_1	WDR93	0.000508615
FP007328	15	10588.3	957.978	11.053	1.202e-07	***	0.954231	SEPT8_1	42986	0.000508615
FP005002	28	3452.45	489.571	7.052	2.162e-07	***	0.81576	IMPG2_1	IMPG2	0.000758275
FP008611	26	292.774	42.8446	6.8334	5.73e-07	***	0.81853	GCLC_1	GCLC	0.00175847
FP014573	24	398.648	56.2252	7.0902	7.14e-07	***	0.845806	AASDHPPT_1	AASDHPPT	0.00194771
FP018860	18	190.272	24.6591	7.7161	1.34e-06	***	0.893735	HERPUD1_1	HERPUD1	0.00328983
FP001958	24	202.391	30.5737	6.6198	2.469e-06	***	0.835199	MPC2_2	MPC2	0.0046798
FP015981	22	300.289	44.434	6.7581	2.478e-06	***	0.846935	ANAPC7_1	ANAPC7	0.0046798
FP021742	16	450.387	56.6093	7.9561	2.375e-06	***	0.874379	MVB12A_1	MVB12A	0.0046798
FP003030	22	194.707	29.7591	6.5428	2.891e-06	***	0.832224	UGP2_2	UGP2	0.0047318
FP009339	14	1993.11	242.836	8.2076	2.89e-06	***	0.921303	LRRC72_1	LRRC72	0.0047318
FP000941	21	331.154	50.3789	6.5733	3.56e-06	***	0.84019	FAM151A_1	FAM151A	0.00494157
FP024056	20	178.363	25.8792	6.8921	3.623e-06	***	0.864892	RNF185_1	RNF185	0.00494157
FP017717	19	3689.62	532.867	6.9241	3.424e-06	***	0.865897	GLDN_2	GLDN	0.00494157
FP015008	15	274.085	32.7431	8.3708	4.235e-06	***	0.929685	CLEC4C_1	CLEC4C	0.00547229
FP004992	19	212.698	32.2608	6.5931	6.185e-06	***	0.717329	TMEM45A_1	TMEM45A	0.00677608
FP008178	27	96.2235	16.5875	5.801	5.569e-06	***	0.764005	MDC1_1	MDC1	0.00677608
FP016589	21	304.49	48.3746	6.2944	6.202e-06	***	0.829221	KDELC1_1	KDELC1	0.00677608
FP009725	14	118.953	14.8244	8.0242	6.348e-06	***	0.924168	SEMA3C_2	SEMA3C	0.00677608
FP023641	26	1165.3	201.962	5.7699	7.061e-06	***	0.769034	DONSON_2	DONSON	0.00721098
FP025429	20	241.945	38.4086	6.2992	8e-06	***	0.836703	G6PD_1	G6PD	0.00721098
FP002134	20	524.162	83.1498	6.3038	7.929e-06	***	0.836886	UCHL5_1	UCHL5	0.00721098
FP010368	15	143.332	19.357	7.4046	8.224e-06	***	0.905778	DPP6_1	DPP6	0.00721098
FP018038	15	14194.5	1897.85	7.4793	7.438e-06	***	0.907398	C15orf37_1	C15orf37	0.00721098
FP008963	18	5514.13	845.406	6.5225	9.647e-06	***	0.859839	TAAR6_1	TAAR6	0.00787166
FP004075	20	193.963	31.4319	6.1709	1.026e-05	***	0.883735	KCNE4_1	KCNE4	0.00787166
FP022565	14	1803.03	234.05	7.7037	9.335e-06	***	0.891699	KLK14_1	KLK14	0.00787166
FP009597	13	4000.35	524.379	7.6287	1.023e-05	***	0.91708	VOPP1_3	VOPP1	0.00787166
FP013100	25	194.964	34.2649	5.6899	1.199e-05	***	0.778818	NOLC1_2	NOLC1	0.00865784
FP024606	16	1981.93	289.717	6.8409	1.187e-05	***	0.808128	PRRG1_1	PRRG1	0.00865784
FP025218	25	190.362	34.2092	5.5646	1.358e-05	***	0.764614	GPC4_1	GPC4	0.00952579
FP020256	21	564.737	94.1891	5.9958	1.446e-05	***	0.823977	EPN3_2	EPN3	0.00986132
FP008140	23	139.02	24.6171	5.6473	1.582e-05	***	0.783954	GABBR1_1	GABBR1	0.0100093
FP008971	20	491.896	80.5244	6.1087	1.51e-05	***	0.813609	RPS12_1	RPS12	0.0100093
FP008845	16	177.427	26.6834	6.6494	1.59e-05	***	0.897073	GTF3C6_1	GTF3C6	0.0100093
FP014453	22	550.745	94.7518	5.8125	1.658e-05	***	0.865259	PCF11_1	PCF11	0.0101764
FP000949	18	-515.812	82.1217	-6.2811	2.019e-05	***	-0.859117	DHCR24_2	DHCR24	0.0109145
FP009935	16	1020.09	156.594	6.5142	1.96e-05	***	0.601695	CLDN15_2	CLDN15	0.0109145
FP020121	16	165.478	25.4424	6.504	1.991e-05	***	0.777392	HIGD1B_2	HIGD1B	0.0109145
FP017287	22	192.371	33.4834	5.7453	1.907e-05	***	0.804435	BTBD7_1	BTBD7	0.0109145
FP013691	11	108.788	13.4642	8.0797	2.045e-05	***	0.849773	RP11-113D6.10_1	RP11-113D6.10	0.0109145
FP022857	16	204.988	30.1498	6.799	1.906e-05	***	0.891015	ZCCHC3_1	ZCCHC3	0.0109145
FP019694	20	5979.93	1029.58	5.8081	2.098e-05	***	0.815428	SLC13A2_1	SLC13A2	0.0109591
FP002260	22	251.338	44.2773	5.6765	2.201e-05	***	0.800995	CDK18_1	CDK18	0.0112577
FP008541	30	4653.63	907.259	5.1293	2.39e-05	***	0.605297	HSP90AB1_2	HSP90AB1	0.0115053
FP001788	22	273.699	49.3022	5.5515	2.355e-05	***	0.786522	CRABP2_1	CRABP2	0.0115053
FP011390	16	18271.7	2749.07	6.6465	2.372e-05	***	0.886784	HAUS6_3	HAUS6	0.0115053
FP001728	24	240.1	44.7176	5.3692	2.52e-05	***	0.76063	RUSC1_1	RUSC1	0.0116733
FP025091	6	15432.1	699.24	22.07	2.495e-05	***	0.995919	AMOT_4	AMOT	0.0116733
FP020326	20	238.64	41.9593	5.6874	2.672e-05	***	0.809629	RAD51C_1	RAD51C	0.0121482
FP006424	18	490.847	80.9101	6.0666	2.904e-05	***	0.791093	SYNPO2_2	SYNPO2	0.0129629
FP012617	19	-2668.3	484.116	-5.5117	4.736e-05	***	-0.809329	RBP3_1	RBP3	0.0137059
FP018916	22	-1431.84	276.837	-5.1721	6.406e-05	***	-0.773159	CDH5_1	CDH5	0.0137059
FP012073	23	173.807	33.8884	5.1288	5.968e-05	***	0.552936	SLC25A25_1	SLC25A25	0.0137059
FP006531	34	482.278	100.168	4.8147	4.245e-05	***	0.574959	C4orf51_1	C4orf51	0.0137059
FP005017	63	432.626	99.1601	4.3629	5.694e-05	***	0.642104	CBLB_1	CBLB	0.0137059
FP024093	65	278.853	64.3739	4.3318	6.064e-05	***	0.652554	LARGE_1	LARGE	0.0137059
FP001228	32	154.427	32.6105	4.7355	6.2e-05	***	0.673586	SLC30A7_1	SLC30A7	0.0137059
FP010528	17	456.002	81.2119	5.615	6.375e-05	***	0.686757	CSGALNACT1_2	CSGALNACT1	0.0137059
FP003642	28	250.099	50.7577	4.9273	4.499e-05	***	0.701911	STK39_1	STK39	0.0137059
FP024299	17	449.239	78.2584	5.7405	5.109e-05	***	0.703551	PARVB_4	PARVB	0.0137059
FP018007	30	473.282	96.181	4.9207	5.082e-05	***	0.706867	TSPAN3_1	TSPAN3	0.0137059
FP007797	37	99.9037	21.0121	4.7546	3.795e-05	***	0.71682	NSD1_2	NSD1	0.0137059
FP010081	27	12303.3	2407.1	5.1113	3.136e-05	***	0.72194	RNF133_1	RNF133	0.0137059
FP023130	17	474.583	82.8073	5.7312	5.193e-05	***	0.722312	BPIFA3_1	BPIFA3	0.0137059
FP014590	18	793.145	134.133	5.9131	3.781e-05	***	0.736748	EXPH5_2	EXPH5	0.0137059
FP002079	18	476.786	81.233	5.8694	4.079e-05	***	0.740872	MR1_1	MR1	0.0137059
FP011997	25	295.135	56.9113	5.1859	3.869e-05	***	0.74935	RABGAP1_2	RABGAP1	0.0137059
FP017886	24	180.694	34.6189	5.2195	3.576e-05	***	0.751471	FEM1B_1	FEM1B	0.0137059
FP017345	24	1200.14	227.442	5.2767	3.651e-05	***	0.762869	EML1_1	EML1	0.0137059
FP004101	22	208.142	40.406	5.1512	5.677e-05	***	0.763375	SPHKAP_1	SPHKAP	0.0137059
FP008999	21	216.516	40.872	5.2974	4.109e-05	***	0.772193	MAP7_1	MAP7	0.0137059
FP004234	22	266.081	49.6969	5.3541	3.627e-05	***	0.775496	KIF1A_2	KIF1A	0.0137059
FP018945	22	220.799	42.3077	5.2189	5.795e-05	***	0.775948	B3GNT9_1	B3GNT9	0.0137059
FP016331	21	1042.47	199.401	5.228	5.683e-05	***	0.776487	CG005_1	CG005	0.0137059
FP002659	21	377.044	72.0582	5.2325	5.629e-05	***	0.77675	HPCAL1_5	HPCAL1	0.0137059
FP007006	22	560.646	106.322	5.2731	5.16e-05	***	0.779126	CCNB1_1	CCNB1	0.0137059
FP006465	22	343.119	63.7921	5.3787	4.121e-05	***	0.785146	INTU_1	INTU	0.0137059
FP002568	23	7689.78	1514.6	5.0771	5.758e-05	***	0.788457	HNRNPU_2	HNRNPU	0.0137059
FP008502	21	228.185	43.1516	5.288	6.026e-05	***	0.788613	MRPL2_1	MRPL2	0.0137059
FP005007	16	391.638	65.0641	6.0193	4.309e-05	***	0.790277	RPL24_1	RPL24	0.0137059
FP017072	20	95.2605	17.908	5.3194	5.648e-05	***	0.790376	ARG2_1	ARG2	0.0137059
FP020740	21	197.389	36.922	5.3461	5.347e-05	***	0.791856	METRNL_2	METRNL	0.0137059
FP017286	20	2461.99	459.597	5.3569	6.42e-05	***	0.801265	BTBD7_2	BTBD7	0.0137059
FP005244	20	220.143	41.0329	5.365	6.317e-05	***	0.801702	PLXND1_2	PLXND1	0.0137059
FP006148	20	230.75	41.5352	5.5555	3.487e-05	***	0.803011	PF4V1_1	PF4V1	0.0137059
FP024852	19	340.367	63.1044	5.3937	5.97e-05	***	0.803226	RAB41_1	RAB41	0.0137059
FP008617	19	260.722	47.5457	5.4836	5.004e-05	***	0.8079	FAM83B_1	FAM83B	0.0137059
FP009717	20	78.5151	14.3053	5.4885	4.956e-05	***	0.808152	GNAI1_2	GNAI1	0.0137059
FP010120	15	571.571	94.364	6.0571	5.697e-05	***	0.810398	CCDC136_2	CCDC136	0.0137059
FP004613	19	6083.68	1074.03	5.6643	3.52e-05	***	0.816857	RTP3_1	RTP3	0.0137059
FP018380	18	1251.76	228.071	5.4885	6.239e-05	***	0.817054	ZSCAN10_1	ZSCAN10	0.0137059
FP019932	17	751.47	136.87	5.4904	6.216e-05	***	0.817151	GJD3_1	GJD3	0.0137059
FP011325	19	176.445	31.8556	5.5389	5.677e-05	***	0.819528	SPATA6L_1	SPATA6L	0.0137059
FP020214	18	4513.92	811.351	5.5635	5.422e-05	***	0.820716	SNF8_1	SNF8	0.0137059
FP016987	18	1425.88	252.285	5.6519	4.6e-05	***	0.824905	PSMA3_1	PSMA3	0.0137059
FP014069	18	212.392	37.3975	5.6793	4.372e-05	***	0.826179	TAF6L_1	TAF6L	0.0137059
FP005439	20	17187.4	3266.5	5.2617	6.361e-05	***	0.834248	KCNAB1_4	KCNAB1	0.0137059
FP014378	17	4485.11	779.26	5.7556	4.975e-05	***	0.83841	UCP3_1	UCP3	0.0137059
FP018325	17	121.982	21.0739	5.7883	4.698e-05	***	0.839817	NTHL1_1	NTHL1	0.0137059
FP011354	17	228.722	39.0089	5.8633	4.122e-05	***	0.842981	KDM4C_2	KDM4C	0.0137059
FP021002	17	196.764	33.2243	5.9223	3.722e-05	***	0.845408	MAPK4_2	MAPK4	0.0137059
FP004333	12	1563.52	222.133	7.0386	3.547e-05	***	0.849175	HRH1_2	HRH1	0.0137059
FP002131	17	1004.3	176.135	5.7019	5.468e-05	***	0.873068	RGS2_1	RGS2	0.0137059
FP017459	16	365.115	63.0688	5.7892	6.287e-05	***	0.89932	SNURF_1	SNURF	0.0137059
FP018678	12	87.4586	13.3082	6.5718	6.298e-05	***	0.901105	DOC2A_3	DOC2A	0.0137059
FP022660	15	301.827	50.4116	5.9872	6.34e-05	***	0.907287	TFPT_1	TFPT	0.0137059
FP007980	12	122.479	17.4927	7.0017	6.313e-05	***	0.91918	MCUR1_1	MCUR1	0.0137059
FP018195	11	121.778	15.262	7.9791	4.45e-05	***	0.942535	LRRK1_1	LRRK1	0.0137059
FP002705	10	10457.9	1146.02	9.1255	3.898e-05	***	0.954915	WDR35_2	WDR35	0.0137059
FP023837	6	2839.11	146.281	19.409	4.155e-05	***	0.994733	SLC25A18_1	SLC25A18	0.0137059
FP019286	22	408.391	79.3107	5.1493	6.729e-05	***	0.570417	MYO1C_1	MYO1C	0.0138775
FP022007	21	472.463	91.7376	5.1502	6.716e-05	***	0.771833	ZNF260_1	ZNF260	0.0138775
FP022771	20	255.438	48.7534	5.2394	6.661e-05	***	0.818361	ZNF583_2	ZNF583	0.0138775
FP022277	17	342.41	61.3632	5.5801	6.783e-05	***	0.830562	ZNF112_1	ZNF112	0.0138775
FP011936	16	249.585	44.6724	5.587	6.699e-05	***	0.830882	ATP6V1G1_1	ATP6V1G1	0.0138775
FP004052	23	340.991	68.3472	4.9891	7.047e-05	***	0.744633	PTPRN_1	PTPRN	0.0138919
FP011423	22	1688.85	329.38	5.1273	7.053e-05	***	0.770445	CDKN2B_1	CDKN2B	0.0138919
FP013639	15	479.661	80.9342	5.9266	6.961e-05	***	0.781961	MICAL2_1	MICAL2	0.0138919
FP008562	19	148.119	27.9059	5.3078	7.073e-05	***	0.798616	TDRD6_1	TDRD6	0.0138919
FP017708	17	113.06	20.3133	5.5658	6.956e-05	***	0.829904	USP8_1	USP8	0.0138919
FP016065	20	12158.1	2295.95	5.2955	7.248e-05	***	0.797941	CCDC64_2	CCDC64	0.0141227
FP013454	21	326.806	62.9824	5.1888	7.395e-05	***	0.782924	TNNI2_1	TNNI2	0.0142956
FP016693	48	1378.94	314.03	4.3911	7.476e-05	***	0.485921	SLC39A2_1	SLC39A2	0.0143393
FP016733	14	342.156	58.2817	5.8707	7.59e-05	***	0.861246	FLJ20424_1	FLJ20424	0.0144451
FP007855	20	5907.97	1126.3	5.2454	8.005e-05	***	0.795178	SQSTM1_4	SQSTM1	0.0151178
FP022757	16	1210.73	221.277	5.4716	8.232e-05	***	0.825451	NLRP4_1	NLRP4	0.0154278
FP013693	20	4489.65	874.831	5.132	8.321e-05	***	0.779572	SAA2_1	SAA2	0.0154764
FP023014	15	3969.29	707.124	5.6133	8.434e-05	***	0.841383	DSTN_2	DSTN	0.0155687
FP006442	18	316.868	59.5874	5.3177	8.611e-05	***	0.808334	EXOSC9_1	EXOSC9	0.0157768
FP005776	20	16361.1	3201.72	5.1101	8.709e-05	***	0.77826	WHSC1_4	WHSC1	0.0158381
FP015030	21	97.7063	19.1525	5.1015	8.866e-05	***	0.777743	M6PR_1	M6PR	0.0160051
FP004959	19	18609.8	3586.14	5.1894	8.951e-05	***	0.79202	PROS1_2	PROS1	0.0160406
FP002812	21	277.827	55.5511	5.0013	9.259e-05	***	0.762575	CCDC121_1	CCDC121	0.016237
FP006081	21	9795.58	1926.48	5.0847	9.182e-05	***	0.776728	TECRL_1	TECRL	0.016237
FP003366	17	498.062	92.1196	5.4067	9.249e-05	***	0.822295	SULT1C4_1	SULT1C4	0.016237
FP019891	24	346.879	72.146	4.808	9.443e-05	***	0.723874	PGAP3_1	PGAP3	0.0162409
FP011994	23	306.468	62.3161	4.9179	9.551e-05	***	0.76587	ZBTB26_2	ZBTB26	0.0162409
FP002840	20	3666.99	724.165	5.0637	9.592e-05	***	0.775453	CAPN13_2	CAPN13	0.0162409
FP004526	18	20304.1	3769.25	5.3868	9.587e-05	***	0.82131	CCR8_1	CCR8	0.0162409
FP014135	27	151.649	31.5735	4.8031	9.555e-05	***	0.880445	CDC42BPG_1	CDC42BPG	0.0162409
FP010203	19	1178.5	228.889	5.1488	9.706e-05	***	0.789696	TMEM213_1	TMEM213	0.0163214
FP009547	21	489.72	98.4491	4.9743	9.814e-05	***	0.703498	OGDH_3	OGDH	0.0163907
FP016956	17	188.606	34.193	5.5159	9.943e-05	***	0.837038	CDKN3_1	CDKN3	0.016494
FP017388	17	366.28	68.3162	5.3615	0.0001003	***	0.820052	TNFAIP2_1	TNFAIP2	0.0165266
FP022176	36	163.027	36.5076	4.4656	0.0001048	***	0.633662	TMEM91_2	TMEM91	0.0167234
FP010964	21	432	87.2255	4.9527	0.0001029	***	0.759448	RBM12B_1	RBM12B	0.0167234
FP000977	19	139.082	27.1855	5.1161	0.0001036	***	0.787794	C1orf87_1	C1orf87	0.0167234
FP019258	17	140.204	26.2703	5.337	0.0001049	***	0.818816	GAS8_2	GAS8	0.0167234
FP012097	14	450.375	76.4362	5.8922	0.0001043	***	0.871432	ODF2_1	ODF2	0.0167234
FP011123	18	4066.74	797.777	5.0976	0.0001075	***	0.786712	FBXO32_2	FBXO32	0.0170273
FP000189	16	440.182	80.6869	5.4554	0.0001102	***	0.787952	C1orf127_1	C1orf127	0.0173431
FP010839	22	806.693	166.422	4.8473	0.0001119	***	0.743572	COPS5_1	COPS5	0.0174654
FP004123	21	284.631	57.0656	4.9878	0.0001124	***	0.770753	ITM2C_2	ITM2C	0.0174654
FP003786	22	301.434	62.3303	4.8361	0.0001148	***	0.742804	TFPI_1	TFPI	0.0176153
FP009918	19	169.694	33.4921	5.0667	0.0001144	***	0.784884	SRRT_1	SRRT	0.0176153
FP007902	19	354.932	70.2105	5.0552	0.0001171	***	0.733102	SERPINB9_2	SERPINB9	0.0177464
FP000425	21	2772.69	566.487	4.8945	0.0001167	***	0.746418	SYF2_1	SYF2	0.0177464
FP000731	21	478.736	98.0797	4.8811	0.0001202	***	0.634963	SLFNL1_2	SLFNL1	0.0180839
FP002623	18	415.341	80.8011	5.1403	0.0001208	***	0.798673	ADI1_1	ADI1	0.0180839
FP006583	21	436.63	89.4309	4.8823	0.0001403	***	0.679887	GUCY1A3_1	GUCY1A3	0.0181807
FP004184	25	408.792	88.0859	4.6408	0.0001261	***	0.70334	ASB18_1	ASB18	0.0181807
FP022788	14	2468.73	443.976	5.5605	0.0001237	***	0.709794	ZNF304_1	ZNF304	0.0181807
FP005631	15	4698.28	849.584	5.5301	0.0001298	***	0.737305	RFC4_1	RFC4	0.0181807
FP017332	23	228.564	47.771	4.7846	0.0001289	***	0.739226	PAPOLA_1	PAPOLA	0.0181807
FP000183	21	971.829	200.754	4.8409	0.0001312	***	0.752049	DFFA_2	DFFA	0.0181807
FP024736	21	4105.9	845.429	4.8566	0.0001268	***	0.753105	PAGE4_1	PAGE4	0.0181807
FP007100	22	230.047	47.2351	4.8703	0.000123	***	0.75402	MTX3_1	MTX3	0.0181807
FP019012	21	153.209	31.3212	4.8915	0.0001376	***	0.76461	ESRP2_1	ESRP2	0.0181807
FP011533	20	362.321	73.428	4.9344	0.0001257	***	0.767369	CCIN_1	CCIN	0.0181807
FP008440	20	264.812	53.3437	4.9643	0.0001407	***	0.778676	DAAM2_2	DAAM2	0.0181807
FP012558	19	4547.65	914.908	4.9706	0.0001389	***	0.779068	CREM_4	CREM	0.0181807
FP022308	19	112.615	22.629	4.9766	0.0001372	***	0.779435	ERCC2_1	ERCC2	0.0181807
FP008166	19	123.235	24.5344	5.023	0.000125	***	0.782262	ABCF1_1	ABCF1	0.0181807
FP009009	18	203.162	40.0188	5.0767	0.0001366	***	0.795051	IFNGR1_1	IFNGR1	0.0181807
FP017660	17	275.94	53.2914	5.1779	0.0001401	***	0.810529	TRIM69_1	TRIM69	0.0181807
FP011127	17	106.525	20.5029	5.1956	0.0001357	***	0.811474	FAM91A1_1	FAM91A1	0.0181807
FP012569	18	180.888	34.8092	5.1966	0.0001354	***	0.811525	ZNF248_1	ZNF248	0.0181807
FP001745	17	747.583	143.803	5.1987	0.0001349	***	0.811637	RIT1_1	RIT1	0.0181807
FP013485	17	467.812	89.4741	5.2285	0.0001278	***	0.813215	SLC22A18_1	SLC22A18	0.0181807
FP002321	17	2970.75	566.905	5.2403	0.000125	***	0.813838	HHAT_4	HHAT	0.0181807
FP014066	15	257.706	48.2953	5.3361	0.0001352	***	0.828581	TTC9C_2	TTC9C	0.0181807
FP013075	19	137.656	27.6066	4.9864	0.0001345	***	0.832038	LZTS2_3	LZTS2	0.0181807
FP004347	32	1581.82	354.298	4.4646	0.0001381	***	0.845908	PPARG_4	PPARG	0.0181807
FP001943	16	283.42	51.5632	5.4966	0.000137	***	0.846004	POGK_1	POGK	0.0181807
FP014513	14	1563.48	273.25	5.7218	0.0001338	***	0.865164	PANX1_1	PANX1	0.0181807
FP001540	24	2556.63	551.795	4.6333	0.0001431	***	0.710988	FAM63A_3	FAM63A	0.018394
FP012585	19	203.359	41.073	4.9512	0.0001444	***	0.777866	HNRNPF_3	HNRNPF	0.0184644
FP019824	16	3783.17	692.937	5.4596	0.0001454	***	0.844375	CCL3L3_1	CCL3L3	0.0184959
FP024853	21	-5108.46	1077.21	-4.7423	0.0001627	***	-0.74528	PDZD11_1	PDZD11	0.018532
FP008570	49	427.115	103.408	4.1304	0.0001638	***	0.663	GPR116_1	GPR116	0.018532
FP019547	26	84.837	18.8123	4.5096	0.000158	***	0.685037	ADPRM_1	ADPRM	0.018532
FP012915	19	146.238	29.8963	4.8915	0.000163	***	0.701386	RNLS_1	RNLS	0.018532
FP003587	22	1163.35	244.285	4.7623	0.0001557	***	0.743246	ACVR1_3	ACVR1	0.018532
FP005204	22	2771.97	583.529	4.7504	0.0001598	***	0.74584	ABTB1_2	ABTB1	0.018532
FP012338	21	116.695	24.2575	4.8107	0.0001631	***	0.759283	GTPBP4_1	GTPBP4	0.018532
FP001829	20	345.505	71.6336	4.8232	0.0001589	***	0.760119	PYHIN1_1	PYHIN1	0.018532
FP002729	21	854.846	177.229	4.8234	0.0001588	***	0.760132	TP53I3_1	TP53I3	0.018532
FP004758	20	340.505	70.5643	4.8255	0.0001581	***	0.760268	RAD54L2_2	RAD54L2	0.018532
FP002963	20	1699.85	351.067	4.8419	0.0001527	***	0.761361	GTF2A1L_1	GTF2A1L	0.018532
FP013652	20	118.141	24.3566	4.8505	0.00015	***	0.761923	BTBD10_1	BTBD10	0.018532
FP014617	20	619.743	126.506	4.8989	0.0001606	***	0.774593	ALG9_1	ALG9	0.018532
FP022238	18	917.343	183.055	5.0113	0.0001549	***	0.791237	XRCC1_1	XRCC1	0.018532
FP024068	18	426.16	84.6684	5.0333	0.0001485	***	0.792531	PRR14L_2	PRR14L	0.018532
FP018128	15	1939.34	359.752	5.3908	0.0001625	***	0.797789	PEX11A_1	PEX11A	0.018532
FP017563	17	262.3	51.4652	5.0967	0.0001627	***	0.806096	RAD51_1	RAD51	0.018532
FP024719	16	2429.85	463.689	5.2403	0.0001595	***	0.823831	CACNA1F_1	CACNA1F	0.018532
FP000143	20	5659.02	1172.99	4.8245	0.0001585	***	0.838942	CAMTA1_2	CAMTA1	0.018532
FP002220	14	353.465	64.9625	5.4411	0.0001498	***	0.843548	CHIT1_1	CHIT1	0.018532
FP024954	23	344.92	74.583	4.6246	0.0001637	***	0.851809	FAM133A_1	FAM133A	0.018532
FP021813	14	394.483	70.4246	5.6015	0.00016	***	0.860479	SUGP2_1	SUGP2	0.018532
FP022643	14	188.152	33.3014	5.65	0.0001488	***	0.862393	ZNF331_5	ZNF331	0.018532
FP021342	14	968.629	164.746	5.8795	0.0001553	***	0.880698	ARRDC5_1	ARRDC5	0.018532
FP004125	18	318.992	64.0985	4.9766	0.0001657	***	0.789176	SPATA3_1	SPATA3	0.018661
FP009991	21	952.786	198.522	4.7994	0.0001671	***	0.758528	PIK3CG_2	PIK3CG	0.0186922
FP017934	13	206.025	33.4671	6.1561	0.0001675	***	0.898938	CD276_1	CD276	0.0186922
FP011038	18	116.138	23.3903	4.9652	0.0001694	***	0.788493	ATP6V1C1_1	ATP6V1C1	0.018734
FP001720	18	4396.19	866.231	5.0751	0.0001693	***	0.804895	FAM189B_2	FAM189B	0.018734
FP020336	22	315.595	67.716	4.6606	0.0001704	***	0.730348	PTRH2_1	PTRH2	0.01876
FP011923	21	1482.89	314.638	4.713	0.0001734	***	0.74322	AMBP_1	AMBP	0.0190051
FP023188	13	15813.6	2758.37	5.733	0.0001895	***	0.685682	CNBD2_1	CNBD2	0.0190773
FP020122	25	153.635	34.2765	4.4822	0.0001858	***	0.690881	EFTUD2_2	EFTUD2	0.0190773
FP010514	21	482.062	103.107	4.6753	0.0001884	***	0.698402	PCM1_5	PCM1	0.0190773
FP008451	23	2638.32	576.631	4.5754	0.0001835	***	0.715132	TREML1_1	TREML1	0.0190773
FP012854	26	144.116	31.8147	4.5299	0.0001831	***	0.729344	ZMIZ1_2	ZMIZ1	0.0190773
FP017795	22	354.34	76.2297	4.6483	0.0001752	***	0.729451	RORA_2	RORA	0.0190773
FP014402	22	293.572	62.7743	4.6766	0.0001878	***	0.740637	SERPINH1_1	SERPINH1	0.0190773
FP020123	22	122.394	26.1493	4.6806	0.0001862	***	0.740918	EFTUD2_1	EFTUD2	0.0190773
FP007966	21	374.908	80.0646	4.6826	0.0001854	***	0.741061	ERVFRD-1_1	ERVFRD-1	0.0190773
FP007541	21	236.761	49.8	4.7543	0.0001838	***	0.755473	KCTD16_1	KCTD16	0.0190773
FP005887	21	11413.3	2395.15	4.7652	0.0001796	***	0.756218	FBXL5_2	FBXL5	0.0190773
FP017167	19	193.077	40.0446	4.8215	0.0001879	***	0.769629	MLH3_1	MLH3	0.0190773
FP010352	19	169.767	35.0832	4.839	0.0001813	***	0.770761	WDR86_1	WDR86	0.0190773
FP006951	17	28728.8	5719.28	5.0231	0.0001863	***	0.780048	ACTBL2_1	ACTBL2	0.0190773
FP014815	18	525.847	106.78	4.9246	0.0001833	***	0.786034	ST3GAL4_3	ST3GAL4	0.0190773
FP009030	18	102.707	20.8038	4.9369	0.000179	***	0.786786	GPR126_1	GPR126	0.0190773
FP012827	17	141.421	28.2056	5.0139	0.0001896	***	0.80144	CAMK2G_1	CAMK2G	0.0190773
FP017375	15	85.5863	16.1457	5.3009	0.0001881	***	0.837104	ZNF839_1	ZNF839	0.0190773
FP019773	9	476.419	66.2161	7.1949	0.0001782	***	0.854437	SPACA3_1	SPACA3	0.0190773
FP003427	14	124.947	22.6652	5.5127	0.0001827	***	0.856877	C1QL2_1	C1QL2	0.0190773
FP025394	16	-265.97	51.7989	-5.1347	0.0001917	***	-0.264685	ARHGAP4_1	ARHGAP4	0.0191318
FP024698	21	577.156	121.896	4.7348	0.0001915	***	0.754144	PQBP1_1	PQBP1	0.0191318
FP024048	17	240.8	48.1063	5.0056	0.0001925	***	0.800961	SMTN_3	SMTN	0.0191339
FP015394	28	-6147.74	1401.02	-4.3881	0.0001969	***	-0.292463	CELA1_1	CELA1	0.0193756
FP015108	19	641.163	133.643	4.7976	0.0001973	***	0.768062	HIST4H4_1	HIST4H4	0.0193756
FP015215	17	6359.35	1273.47	4.9937	0.0001968	***	0.80028	IPO8_2	IPO8	0.0193756
FP001084	21	20939.7	4438.81	4.7174	0.0001987	***	0.752943	USP33_2	USP33	0.0193972
FP022377	6	491.726	37.684	13.049	0.0001991	***	0.988457	TMEM160_1	TMEM160	0.0193972
FP022127	23	381.666	83.1506	4.5901	0.0001999	***	0.777848	AKT2_2	AKT2	0.0193982
FP001060	20	150.177	31.3977	4.7831	0.0002032	***	0.767107	FPGT_1	FPGT	0.0195638
FP001398	16	2084.57	408.577	5.102	0.000203	***	0.816657	TRIM45_1	TRIM45	0.0195638
FP020303	21	489.55	105.702	4.6314	0.0002074	***	0.669511	CUEDC1_2	CUEDC1	0.0196314
FP018782	20	230.531	49.0892	4.6962	0.0002079	***	0.751468	DNAJA2_1	DNAJA2	0.0196314
FP008740	16	4633.79	910.361	5.0901	0.0002073	***	0.816018	SPACA1_1	SPACA1	0.0196314
FP003186	17	116.95	22.9542	5.0949	0.0002056	***	0.816278	TCF7L1_1	TCF7L1	0.0196314
FP018545	12	246.889	41.28	5.9809	0.0002073	***	0.893855	GPRC5B_1	GPRC5B	0.0196314
FP005106	17	353.453	71.436	4.9478	0.0002143	***	0.797612	CD80_1	CD80	0.0201582
FP023807	11	100.791	16.9663	5.9407	0.0002178	***	0.855356	SLC19A1_2	SLC19A1	0.0204092
FP013981	20	28656.9	6140.48	4.6669	0.0002212	***	0.749419	MS4A2_1	MS4A2	0.020649
FP000727	19	407.999	86.2231	4.7319	0.0002256	***	0.485338	CTPS1_1	CTPS1	0.0207442
FP006629	22	386.057	85.0632	4.5385	0.0002247	***	0.721232	DDX60L_3	DDX60L	0.0207442
FP000974	19	209.047	44.1726	4.7325	0.0002253	***	0.763739	HOOK1_2	HOOK1	0.0207442
FP019325	17	228.052	46.293	4.9263	0.0002231	***	0.796345	SPATA22_2	SPATA22	0.0207442
FP014507	19	-521.384	110.305	-4.7267	0.000228	***	-0.454166	MGC5306_1	MGC5306	0.0208867
FP011326	21	533.035	116.693	4.5679	0.0002385	***	0.601635	CDC37L1_1	CDC37L1	0.0214574
FP000719	22	596.974	132.258	4.5137	0.0002377	***	0.719335	ZNF684_1	ZNF684	0.0214574
FP001825	20	13529.6	2921.27	4.6314	0.0002386	***	0.746906	OR10X1_1	OR10X1	0.0214574
FP021635	18	3285.01	685.77	4.7903	0.0002384	***	0.777629	C19orf53_1	C19orf53	0.0214574
FP012302	9	400.472	51.4544	7.783	0.0002369	***	0.942716	C9orf169_1	C9orf169	0.0214574
FP003554	21	397.282	85.8493	4.6277	0.0002405	***	0.746638	NMI_1	NMI	0.0215493
FP020004	19	191.679	40.8208	4.6956	0.000243	***	0.761242	ACLY_1	ACLY	0.0216156
FP015459	16	3846.88	769.361	5.0001	0.0002429	***	0.811113	ITGB7_2	ITGB7	0.0216156
FP018572	21	1750.17	384.649	4.55	0.0002481	***	0.731382	IGSF6_1	IGSF6	0.0217539
FP016205	15	397.877	74.8828	5.3133	0.0002473	***	0.747506	GALNT9_3	GALNT9	0.0217539
FP020806	17	343.165	70.4378	4.8719	0.0002469	***	0.793092	TXNDC2_1	TXNDC2	0.0217539
FP006986	17	269.836	55.3629	4.8739	0.000246	***	0.793216	CTC-534A2.2_1	CTC-534A2.2	0.0217539
FP006985	17	254.825	52.3569	4.8671	0.0002492	***	0.792801	TRIM23_1	TRIM23	0.0217726
FP014658	21	521.646	114.834	4.5426	0.0002522	***	0.476511	ZNF259_1	ZNF259	0.0218625
FP013747	83	230.883	60.0031	3.8478	0.0002529	***	0.585029	BDNF_4	BDNF	0.0218625
FP017012	21	260.297	57.3169	4.5414	0.0002529	***	0.730731	C14orf39_1	C14orf39	0.0218625
FP016461	17	-222.073	45.7628	-4.8527	0.000256	***	-0.791929	RNASEH2B_1	RNASEH2B	0.0218828
FP002917	20	464.51	101.046	4.597	0.0002567	***	0.744437	DYNC2LI1_1	DYNC2LI1	0.0218828
FP001249	20	407.557	88.5703	4.6015	0.0002542	***	0.744761	NBPF6_1	NBPF6	0.0218828
FP021320	20	423.129	92.0236	4.5981	0.0002561	***	0.748379	FLJ10374_1	FLJ10374	0.0218828
FP023613	21	415.239	91.7756	4.5245	0.0002624	***	0.605204	MRAP_1	MRAP	0.0222144
FP007623	20	1580.16	344.513	4.5866	0.0002624	***	0.743687	ANXA6_2	ANXA6	0.0222144
FP013259	21	124.396	27.1387	4.5837	0.0002641	***	0.743476	SEC23IP_1	SEC23IP	0.0222556
FP014161	23	348.378	78.0013	4.4663	0.0002647	***	0.79141	CAPN1_4	CAPN1	0.0222556
FP015264	19	-201.723	43.3993	-4.6481	0.0002679	***	-0.757971	PUS7L_1	PUS7L	0.0223019
FP014817	24	271.728	61.5753	4.4129	0.000268	***	0.445908	ST3GAL4_4	ST3GAL4	0.0223019
FP015382	24	155.734	35.6504	4.3684	0.0002693	***	0.689987	LETMD1_1	LETMD1	0.0223019
FP023377	17	1782.22	369.49	4.8235	0.0002704	***	0.790139	UBE2V1_2	UBE2V1	0.0223019
FP018754	17	8581.72	1776.86	4.8297	0.0002672	***	0.790524	C16orf98_1	C16orf98	0.0223019
FP017107	12	150.049	27.4009	5.4761	0.0002707	***	0.86598	PCNX_1	PCNX	0.0223019
FP020516	19	371.165	80.0546	4.6364	0.0002744	***	0.75716	SLC16A5_3	SLC16A5	0.0223073
FP010139	17	378.604	78.601	4.8168	0.0002738	***	0.789729	ZC3HC1_1	ZC3HC1	0.0223073
FP004037	17	127.237	26.3985	4.8199	0.0002722	***	0.789918	CNPPD1_2	CNPPD1	0.0223073
FP025170	15	167.67	33.0549	5.0725	0.0002741	***	0.825802	DCAF12L1_1	DCAF12L1	0.0223073
FP011504	68	137.228	35.6207	3.8525	0.0002764	***	0.6377	STOML2_1	STOML2	0.0223957
FP004843	14	-225.064	42.9896	-5.2353	0.0002788	***	-0.844752	ARHGEF3_3	ARHGEF3	0.0224432
FP002783	21	-10212	2240.45	-4.558	0.000279	***	-0.357515	C2orf53_1	C2orf53	0.0224432
FP006016	21	346.993	77.2441	4.4922	0.0002818	***	0.72701	CNGA1_2	CNGA1	0.0224432
FP002685	20	208.948	45.9063	4.5516	0.0002828	***	0.741134	DDX1_2	DDX1	0.0224432
FP024073	20	11636.7	2519.17	4.6192	0.0002843	***	0.755961	DEPDC5_4	DEPDC5	0.0224432
FP011888	17	166.602	34.7257	4.7977	0.0002838	***	0.788544	HSDL2_1	HSDL2	0.0224432
FP010013	17	196.721	40.9538	4.8035	0.0002807	***	0.788906	PNPLA8_2	PNPLA8	0.0224432
FP003310	10	129.14	19.3356	6.6789	0.0002829	***	0.920423	REV1_1	REV1	0.0224432
FP010238	29	-4851.21	1158.14	-4.1888	0.0002853	***	-0.742896	TAS2R4_1	TAS2R4	0.02245
FP001887	22	131.495	29.6924	4.4286	0.0002884	***	0.712691	B4GALT3_2	B4GALT3	0.0225012
FP006509	21	206.068	45.9724	4.4824	0.000288	***	0.763064	IL15_1	IL15	0.0225012
FP000304	15	3188.7	650.408	4.9026	0.0002887	***	0.805598	ALDH4A1_2	ALDH4A1	0.0225012
FP007055	20	283.893	62.5654	4.5375	0.0002914	***	0.740097	HEXB_1	HEXB	0.0225683
FP007770	15	120.789	24.6602	4.8981	0.0002911	***	0.805338	HRH2_1	HRH2	0.0225683
FP007478	21	1171.9	258.757	4.5289	0.0002968	***	0.739462	PCDHB8_1	PCDHB8	0.0229143
FP011893	18	95.0742	20.3391	4.6745	0.0002994	***	0.835292	SLC46A2_1	SLC46A2	0.0229372
FP021035	16	237.623	47.3501	5.0184	0.0002999	***	0.854459	ONECUT2_1	ONECUT2	0.0229372
FP008704	14	15942.2	2949.42	5.4052	0.0002992	***	0.863136	IBTK_2	IBTK	0.0229372
FP001086	22	442.929	100.51	4.4068	0.000303	***	0.710963	FAM73A_1	FAM73A	0.0231023
FP015399	64	154.793	40.3264	3.8385	0.0003127	***	0.548758	SLC4A8_3	SLC4A8	0.0235374
FP000607	20	4175.49	927.203	4.5033	0.0003135	***	0.737557	PHC2_3	PHC2	0.0235374
FP000156	17	385.541	81.2317	4.7462	0.0003127	***	0.785312	CA6_1	CA6	0.0235374
FP003160	17	1530.22	322.347	4.7471	0.0003121	***	0.785371	M1AP_1	M1AP	0.0235374
FP015093	18	20038.8	4221.26	4.7471	0.0003121	***	0.785371	APOLD1_2	APOLD1	0.0235374
FP001721	22	149.659	34.0885	4.3903	0.0003146	***	0.70964	FAM189B_1	FAM189B	0.023548
FP015184	21	472.059	104.954	4.4978	0.0003173	***	0.573419	SSPN_1	SSPN	0.0236056
FP003618	98	2044.59	545.59	3.7475	0.0003188	***	0.627868	FAP_1	FAP	0.0236056
FP014695	25	341.734	80.2754	4.257	0.0003221	***	0.672068	CD3D_1	CD3D	0.0236056
FP011147	22	192.53	43.4084	4.4353	0.0003195	***	0.722629	FAM49B_2	FAM49B	0.0236056
FP002573	18	101.642	21.9009	4.641	0.0003199	***	0.767773	KIF26B_1	KIF26B	0.0236056
FP022919	17	370.565	78.3263	4.731	0.0003218	***	0.784348	GNRH2_1	GNRH2	0.0236056
FP019260	16	305.245	61.3374	4.9765	0.0003217	***	0.839964	RPH3AL_1	RPH3AL	0.0236056
FP001006	17	3961.26	854.776	4.6343	0.0003242	***	0.767317	RAVER2_2	RAVER2	0.0236888
FP003909	22	809.493	182.953	4.4246	0.0003272	***	0.721792	CARF_1	CARF	0.0238371
FP021208	16	-298.939	61.9405	-4.8262	0.0003309	***	-0.801124	RPS15_1	RPS15	0.0238939
FP023691	17	619.784	128.402	4.8269	0.0003305	***	0.801163	DSCR4_1	DSCR4	0.0238939
FP014253	15	8768.08	1767.36	4.9611	0.0003301	***	0.833233	KDM2A_3	KDM2A	0.0238939
FP018375	18	191.537	41.4705	4.6186	0.0003344	***	0.76625	MMP25_1	MMP25	0.0240054
FP020716	8	181.436	24.8113	7.3126	0.0003338	***	0.948218	CCDC57_1	CCDC57	0.0240054
FP015057	21	-38291.1	8682.32	-4.4102	0.0003377	***	-0.339485	KLRC1_1	KLRC1	0.0241014
FP012896	19	365.273	79.166	4.614	0.0003375	***	0.765933	MMRN2_1	MMRN2	0.0241014
FP010422	20	325.554	72.9316	4.4638	0.0003412	***	0.734587	DEFA6_1	DEFA6	0.0241406
FP003950	17	326.864	69.5011	4.703	0.0003393	***	0.78255	IDH1_3	IDH1	0.0241406
FP021741	5	326.84	17.5911	18.5799	0.0003403	***	0.995683	BST2_1	BST2	0.0241406
FP018643	21	1565.15	351.205	4.4565	0.0003465	***	0.364673	ATP2A1_2	ATP2A1	0.0244452
FP013285	21	89.8166	20.4364	4.3949	0.0003494	***	0.719463	CUZD1_1	CUZD1	0.0245089
FP004356	20	2043.88	458.958	4.4533	0.0003489	***	0.733787	RPL32_2	RPL32	0.0245089
FP011307	17	390.729	83.4448	4.6825	0.0003527	***	0.781221	KANK1_6	KANK1	0.0246699
FP013540	21	361.27	82.3451	4.3873	0.0003553	***	0.710384	PRKCDBP_1	PRKCDBP	0.024711
FP019804	24	386.391	90.016	4.2925	0.0003551	***	0.717954	PEX12_1	PEX12	0.024711
FP012881	18	169.761	37.036	4.5837	0.0003584	***	0.76384	CDHR1_1	CDHR1	0.0248
FP010332	16	1930.94	403.845	4.7814	0.0003586	***	0.798434	ASIC3_1	ASIC3	0.0248
FP011599	102	340.099	91.866	3.7021	0.0003623	***	0.510671	TRPM3_2	TRPM3	0.0248459
FP022616	15	543.067	110.67	4.9071	0.0003616	***	0.746837	ZNF701_2	ZNF701	0.0248459
FP022925	17	873.317	187.009	4.6699	0.0003612	***	0.780403	ITPA_1	ITPA	0.0248459
FP004188	18	229.28	50.1231	4.5743	0.0003651	***	0.763189	COPS8_1	COPS8	0.0249682
FP019565	20	297.117	67.0813	4.4292	0.0003674	***	0.731947	TEKT3_1	TEKT3	0.0250515
FP021433	16	268.957	56.4635	4.7634	0.0003704	***	0.797339	SNAPC2_2	SNAPC2	0.0250515
FP017536	16	282.233	59.25	4.7634	0.0003704	***	0.797343	GPR176_1	GPR176	0.0250515
FP009272	16	110.132	23.1072	4.7661	0.0003686	***	0.797508	PAPOLB_1	PAPOLB	0.0250515
FP022512	21	276.553	63.404	4.3618	0.000376	***	0.449267	AKT1S1_2	AKT1S1	0.0253604
FP017436	18	404.671	87.1404	4.6439	0.0003795	***	0.778693	MTA1_3	MTA1	0.0254566
FP022798	16	7054.36	1484.89	4.7508	0.0003789	***	0.79657	ZNF550_2	ZNF550	0.0254566
FP015017	15	437.545	89.803	4.8723	0.0003835	***	0.735515	ZNF705A_1	ZNF705A	0.0254733
FP017951	18	2189.24	481.248	4.5491	0.0003839	***	0.761423	STRA6_1	STRA6	0.0254733
FP001425	16	4405.45	928.504	4.7447	0.0003831	***	0.796195	NBPF8_2	NBPF8	0.0254733
FP008128	16	4712.85	992.626	4.7479	0.0003809	***	0.796391	ZSCAN31_2	ZSCAN31	0.0254733
FP014639	22	3341.58	768.792	4.3465	0.0003889	***	0.715607	USP28_2	USP28	0.0255975
FP024582	17	1380.18	297.9	4.633	0.0003874	***	0.777975	MAGEB2_1	MAGEB2	0.0255975
FP011796	13	231.457	46.0808	5.0229	0.0003883	***	0.834492	COL15A1_1	COL15A1	0.0255975
FP009286	20	268.931	60.217	4.466	0.00039	***	0.744904	RSPH10B_1	RSPH10B	0.0256013
FP002298	22	220.59	51.4024	4.2914	0.000394	***	0.701571	CR2_1	CR2	0.0257102
FP013869	19	123.406	27.2093	4.5354	0.0003945	***	0.760459	DGKZ_4	DGKZ	0.0257102
FP015896	16	335.062	70.8694	4.7279	0.0003948	***	0.79516	C12orf73_1	C12orf73	0.0257102
FP013674	19	889.542	199.519	4.4584	0.0003962	***	0.744339	RPS13_1	RPS13	0.0257331
FP012442	17	317.244	68.7003	4.6178	0.0003987	***	0.776962	PTER_1	PTER	0.0258271
FP006058	18	189.014	41.7546	4.5268	0.0004013	***	0.759846	EXOC1_1	EXOC1	0.0259271
FP002834	19	489.563	110.164	4.4439	0.0004083	***	0.695133	ALK_2	ALK	0.0260368
FP004312	18	164.117	36.3175	4.5189	0.0004076	***	0.75929	JAGN1_1	JAGN1	0.0260368
FP008254	29	545.619	132.109	4.1301	0.0004071	***	0.79027	DDAH2_1	DDAH2	0.0260368
FP005886	14	737.859	147.741	4.9943	0.0004062	***	0.833041	CC2D2A_2	CC2D2A	0.0260368
FP017581	7	31386.9	3767.85	8.3302	0.0004076	***	0.968	NUSAP1_2	NUSAP1	0.0260368
FP016308	17	215.005	46.7492	4.5991	0.0004132	***	0.775712	SLC46A3_1	SLC46A3	0.026281
FP016735	44	154.899	40.1598	3.8571	0.0004188	***	0.549891	AJUBA_1	AJUBA	0.0262966
FP015365	22	2304.16	534.225	4.3131	0.0004188	***	0.688825	GPD1_1	GPD1	0.0262966
FP009962	18	109.685	24.3426	4.5059	0.0004184	***	0.758357	NAPEPLD_1	NAPEPLD	0.0262966
FP011351	16	399.224	84.954	4.6993	0.0004157	***	0.793382	TPD52L3_1	TPD52L3	0.0262966
FP008862	16	91.6002	18.9926	4.8229	0.000417	***	0.812206	HDAC2_2	HDAC2	0.0262966
FP004993	21	6531.69	1496.22	4.3655	0.0004213	***	0.726998	TMEM45A_2	TMEM45A	0.0263861
FP004091	59	98.9335	26.2949	3.7625	0.0004287	***	0.441154	IRS1_1	IRS1	0.0264428
FP023385	43	119.462	30.9334	3.8619	0.0004244	***	0.609699	PARD6B_1	PARD6B	0.0264428
FP000810	26	355.919	86.6274	4.1086	0.0004294	***	0.650601	TCTEX1D4_1	TCTEX1D4	0.0264428
FP014136	20	193.914	43.9005	4.4171	0.0004316	***	0.74124	EHD1_2	EHD1	0.0264428
FP021170	19	1229.15	277.891	4.4232	0.0004263	***	0.741695	PRTN3_1	PRTN3	0.0264428
FP005768	16	5844.81	1249.37	4.6782	0.0004319	***	0.792058	TMEM129_2	TMEM129	0.0264428
FP021148	16	3377.72	721.723	4.6801	0.0004304	***	0.792175	THEG_1	THEG	0.0264428
FP024810	22	626.252	147.063	4.2584	0.0004248	***	0.795573	UBQLN2_1	UBQLN2	0.0264428
FP011340	14	101.712	21.1682	4.805	0.0004299	***	0.811172	CD274_1	CD274	0.0264428
FP024135	21	224.037	52.1488	4.2961	0.0004348	***	0.711521	SSTR3_1	SSTR3	0.0265542
FP017765	18	350.241	76.6791	4.5676	0.0004387	***	0.773583	TCF12_4	TCF12	0.0267259
FP024641	20	3503.83	806.443	4.3448	0.0004404	***	0.725371	KRBOX4_1	KRBOX4	0.026763
FP000673	24	428.579	102.088	4.1981	0.0004427	***	0.684418	MTF1_1	MTF1	0.0267703
FP006748	9	146.642	21.1125	6.9458	0.0004417	***	0.939431	LPCAT1_1	LPCAT1	0.0267703
FP001418	20	282.829	65.1927	4.3384	0.0004466	***	0.724861	ADAM30_1	ADAM30	0.0268737
FP017541	39	1055.57	272.343	3.8759	0.0004463	***	0.7438	BMF_2	BMF	0.0268737
FP015556	18	719.522	160.927	4.4711	0.0004484	***	0.755855	RPS26_1	RPS26	0.0269161
FP012542	24	33158.5	7989.69	4.1502	0.0004538	***	0.442184	C10orf68_1	C10orf68	0.0270419
FP011242	19	222.509	49.8252	4.4658	0.0004532	***	0.755468	PLEC_4	PLEC	0.0270419
FP019106	14	296.204	60.1413	4.9251	0.0004532	***	0.813989	WDR59_1	WDR59	0.0270419
FP014884	18	762.549	171.171	4.4549	0.0004632	***	0.556227	WNT5B_2	WNT5B	0.0270762
FP011535	19	1194.58	272.47	4.3843	0.0004621	***	0.738741	GNE_2	GNE	0.0270762
FP012672	19	1021.73	232.952	4.386	0.0004604	***	0.738874	ZWINT_1	ZWINT	0.0270762
FP023892	19	7105.47	1620.11	4.3858	0.0004606	***	0.769757	SERPIND1_2	SERPIND1	0.0270762
FP021222	17	356.396	76.7847	4.6415	0.0004616	***	0.789724	TCF3_2	TCF3	0.0270762
FP005483	17	2493.66	536.533	4.6477	0.0004564	***	0.790122	BCHE_1	BCHE	0.0270762
FP015072	5	27615	1644.37	16.794	0.0004597	***	0.994723	TAS2R43_1	TAS2R43	0.0270762
FP021379	6	15304.7	911.335	16.794	0.0004597	***	0.994723	SLC25A41_1	SLC25A41	0.0270762
FP000705	19	4863.91	1093.27	4.449	0.0004687	***	0.595817	PPT1_1	PPT1	0.0271043
FP019583	22	657.816	154.35	4.2619	0.0004692	***	0.708703	PIGL_1	PIGL	0.0271043
FP022253	17	391.187	87.935	4.4486	0.000469	***	0.754216	LYPD5_1	LYPD5	0.0271043
FP012789	18	128.93	28.416	4.5372	0.0004649	***	0.771502	ASCC1_1	ASCC1	0.0271043
FP016683	17	1406.3	303.332	4.6362	0.0004661	***	0.789381	ANG_2	ANG	0.0271043
FP023025	17	-4864	1074.07	-4.5286	0.0004726	***	-0.770907	CSRP2BP_2	CSRP2BP	0.0271728
FP018071	19	2866.28	644.812	4.4451	0.0004723	***	0.753963	CPEB1_3	CPEB1	0.0271728
FP019534	20	243.387	56.4603	4.3108	0.0004739	***	0.722662	GAS7_6	GAS7	0.0271839
FP018506	16	347.311	75.1602	4.6209	0.0004791	***	0.788402	C16orf45_2	C16orf45	0.0274181
FP006368	21	378.453	89.0955	4.2477	0.0004841	***	0.70753	TBCK_1	TBCK	0.0275346
FP025268	17	171.287	37.0996	4.617	0.0004826	***	0.740667	ZIC3_1	ZIC3	0.0275346
FP012701	18	218.655	49.3314	4.4324	0.0004845	***	0.753026	C10orf107_1	C10orf107	0.0275346
FP016901	18	870.498	196.634	4.427	0.0004897	***	0.752631	FANCM_1	FANCM	0.0276382
FP008775	16	373.833	81.0894	4.6101	0.0004886	***	0.787703	COQ3_1	COQ3	0.0276382
FP018132	13	145.334	28.6963	5.0646	0.0004887	***	0.848231	ANPEP_1	ANPEP	0.0276382
FP008226	46	355.177	93.4181	3.802	0.0004926	***	0.275679	LTB_1	LTB	0.0277012
FP006032	16	293.372	65.1114	4.5057	0.0004938	***	0.769319	CWH43_1	CWH43	0.0277012
FP006227	14	1012.91	207.961	4.8707	0.0004942	***	0.826565	PLAC8_2	PLAC8	0.0277012
FP004195	21	1276.91	301.706	4.2323	0.000501	***	0.68425	RAB17_1	RAB17	0.0278208
FP019988	20	135.737	31.6743	4.2854	0.0005005	***	0.720621	KRT19_1	KRT19	0.0278208
FP008867	20	352.688	82.267	4.2871	0.0004986	***	0.72076	NT5DC1_2	NT5DC1	0.0278208
FP021819	16	823.961	179.308	4.5952	0.000502	***	0.786734	RFXANK_1	RFXANK	0.0278208
FP017878	14	84.0465	17.8273	4.7145	0.0005017	***	0.80585	C15orf61_1	C15orf61	0.0278208
FP022606	16	3105.05	676.11	4.5925	0.0005045	***	0.786557	ZNF766_2	ZNF766	0.0278964
FP006029	17	213.048	47.4561	4.4894	0.0005095	***	0.768178	OCIAD1_1	OCIAD1	0.0281095
FP002464	15	166.23	35.4201	4.6931	0.0005204	***	0.804562	TRIM17_1	TRIM17	0.0286465
FP018566	21	373.461	87.5803	4.2642	0.0005238	***	0.718902	ZP2_1	ZP2	0.0287323
FP007492	17	279.014	62.3578	4.4744	0.0005243	***	0.767126	PCDHGB2_1	PCDHGB2	0.0287323
FP017745	23	444.614	108.004	4.1166	0.0005356	***	0.332606	RAB27A_2	RAB27A	0.0289638
FP021204	23	312.325	75.955	4.112	0.0005414	***	0.489457	MUM1_2	MUM1	0.0289638
FP007475	22	1621.65	390.484	4.1529	0.0005404	***	0.689794	PCDHB5_1	PCDHB5	0.0289638
FP008506	21	105.761	25.1944	4.1978	0.0005409	***	0.703341	PTK7_2	PTK7	0.0289638
FP001873	21	2664.88	634.048	4.203	0.0005347	***	0.703777	ITLN1_1	ITLN1	0.0289638
FP003003	17	228.339	52.1707	4.3768	0.0005415	***	0.748892	FANCL_1	FANCL	0.0289638
FP025341	16	131.064	29.3304	4.4685	0.0005302	***	0.766712	GABRE_1	GABRE	0.0289638
FP020191	16	302.264	66.3755	4.5539	0.0005413	***	0.784011	SNX11_1	SNX11	0.0289638
FP017896	16	329.031	72.2185	4.556	0.0005392	***	0.784157	PAQR5_2	PAQR5	0.0289638
FP019799	16	2126.8	466.131	4.5627	0.0005327	***	0.784594	SLFN12_1	SLFN12	0.0289638
FP025369	15	6686.25	1431.45	4.671	0.0005406	***	0.803218	ATP2B3_1	ATP2B3	0.0289638
FP003949	17	-5160.91	1159.48	-4.451	0.0005483	***	-0.76547	C2orf80_1	C2orf80	0.0290019
FP015236	21	425.094	101.353	4.1942	0.0005452	***	0.681949	YARS2_1	YARS2	0.0290019
FP013971	22	225.826	53.8862	4.1908	0.0005493	***	0.702747	MPEG1_1	MPEG1	0.0290019
FP009912	19	338.853	78.7774	4.3014	0.0005491	***	0.732297	GIGYF1_1	GIGYF1	0.0290019
FP010980	18	21719.4	4968.62	4.3713	0.0005475	***	0.748482	INTS8_2	INTS8	0.0290019
FP005503	18	145.401	32.635	4.4554	0.0005438	***	0.765777	PHC3_1	PHC3	0.0290019
FP001168	15	75.7767	16.2663	4.6585	0.0005523	***	0.802457	RPAP2_1	RPAP2	0.0290977
FP004297	39	237.808	62.3887	3.8117	0.0005535	***	0.663234	LHFPL4_1	LHFPL4	0.0290985
FP005857	17	4418.13	994.234	4.4437	0.000556	***	0.76495	PSAPL1_1	PSAPL1	0.0291674
FP012687	23	16211.2	3918.02	4.1376	0.0005596	***	0.504869	C10orf40_1	C10orf40	0.0292523
FP017656	17	1943.65	428.566	4.5352	0.00056	***	0.782771	SPG11_2	SPG11	0.0292523
FP007222	20	348.771	82.5015	4.2275	0.000567	***	0.715887	TSSK1B_1	TSSK1B	0.029555
FP023642	23	327.044	79.2488	4.1268	0.0005736	***	0.687509	DONSON_1	DONSON	0.0298357
FP004220	15	39.2118	8.21348	4.7741	0.0005769	***	0.821266	MYEOV2_1	MYEOV2	0.0299439
FP017737	46	150.265	40.1884	3.739	0.0005784	***	0.579774	FAM214A_2	FAM214A	0.0299584
FP015608	36	178.306	46.6905	3.8189	0.0005809	***	0.606183	NAB2_1	NAB2	0.029977
FP013837	15	306.318	66.1758	4.6289	0.0005812	***	0.800626	HSD17B12_1	HSD17B12	0.029977
FP012884	21	397.837	95.6326	4.1601	0.0005882	***	0.700123	RGR_1	RGR	0.0299807
FP024671	22	209.736	50.3825	4.1629	0.0005845	***	0.700365	ZNF630_2	ZNF630	0.0299807
FP021090	20	371.071	88.0499	4.2143	0.0005833	***	0.714801	SERPINB8_1	SERPINB8	0.0299807
FP020737	18	298.154	67.5451	4.4141	0.0005886	***	0.762823	ZNF750_1	ZNF750	0.0299807
FP016503	16	992.02	219.997	4.5092	0.0005873	***	0.781025	UCHL3_1	UCHL3	0.0299807
FP015875	14	162.433	35.1328	4.6234	0.0005867	***	0.800287	UTP20_1	UTP20	0.0299807
FP004600	21	466.882	112.29	4.1578	0.0005911	***	0.473745	CXCR6_2	CXCR6	0.0300371
FP023183	52	177.62	48.0756	3.6946	0.0005946	***	0.529042	NFS1_1	NFS1	0.0300371
FP007018	21	5705.04	1372.46	4.1568	0.0005924	***	0.699845	RAD17_6	RAD17	0.0300371
FP017077	17	142.248	32.2599	4.4094	0.0005939	***	0.762482	RAD51B_1	RAD51B	0.0300371
FP001165	19	-392.063	92.0147	-4.2609	0.0005975	***	-0.729074	BTBD8_1	BTBD8	0.0300725
FP019977	24	155.259	38.5494	4.0275	0.0006083	***	0.660154	KRTAP17-1_1	KRTAP17-1	0.0300725
FP004117	22	2015.94	486.733	4.1418	0.0006126	***	0.69855	SP100_2	SP100	0.0300725
FP008917	21	34419.2	8293.3	4.1502	0.0006012	***	0.69928	TPD52L1_3	TPD52L1	0.0300725
FP024479	19	189.513	44.6145	4.2478	0.000614	***	0.728023	TCEANC_1	TCEANC	0.0300725
FP007437	17	375.349	83.5189	4.4942	0.0006037	***	0.732441	ANKHD1_5	ANKHD1	0.0300725
FP018223	18	173.113	40.1329	4.3135	0.0006149	***	0.744081	MRPL28_1	MRPL28	0.0300725
FP015850	18	5005.81	1156.83	4.3272	0.0005982	***	0.745132	NEDD1_3	NEDD1	0.0300725
FP009862	17	822.286	187.097	4.395	0.0006107	***	0.761433	TRIM4_1	TRIM4	0.0300725
FP024234	17	313.854	71.2622	4.4042	0.0005999	***	0.762104	CHADL_1	CHADL	0.0300725
FP010111	13	728.841	148.383	4.9119	0.0006122	***	0.762197	IMPDH1_1	IMPDH1	0.0300725
FP003054	16	57863.2	12895.2	4.4872	0.0006115	***	0.779529	C1D_2	C1D	0.0300725
FP009372	17	1216.31	270.849	4.4907	0.0006075	***	0.779771	TOMM7_1	TOMM7	0.0300725
FP007950	17	331.662	73.7831	4.4951	0.0006027	***	0.780066	TFAP2A_3	TFAP2A	0.0300725
FP019272	11	190.153	34.885	5.4509	0.0006081	***	0.887618	ABR_6	ABR	0.0300725
FP016199	9	89.7823	13.7258	6.5411	0.0006103	***	0.936491	PUS1_1	PUS1	0.0300725
FP002709	14	206.482	44.9597	4.5926	0.0006188	***	0.626534	SDC1_2	SDC1	0.0301578
FP015692	20	820.351	195.94	4.1867	0.0006191	***	0.712501	LLPH_1	LLPH	0.0301578
FP003482	18	129.912	30.6467	4.239	0.0006254	***	0.591016	MZT2B_1	MZT2B	0.0301886
FP024583	25	11716	2917.67	4.0155	0.000626	***	0.659042	MAGEB3_1	MAGEB3	0.0301886
FP005146	20	224.71	53.7836	4.178	0.0006308	***	0.711771	DTX3L_1	DTX3L	0.0301886
FP022659	19	729.954	172.164	4.2399	0.0006243	***	0.727384	PRPF31_1	PRPF31	0.0301886
FP005374	17	253.148	57.8045	4.3794	0.0006293	***	0.760293	PLSCR1_1	PLSCR1	0.0301886
FP017529	24	419.233	104.442	4.014	0.0006283	***	0.76727	FAM98B_1	FAM98B	0.0301886
FP002122	16	2066.83	462.297	4.4708	0.0006301	***	0.778406	C1orf27_2	C1orf27	0.0301886
FP007626	16	211.347	47.2031	4.4774	0.0006225	***	0.778861	GM2A_1	GM2A	0.0301886
FP004978	15	282.066	61.453	4.5899	0.0006216	***	0.79819	CPOX_1	CPOX	0.0301886
FP024648	28	211.334	54.1277	3.9044	0.0006331	***	0.701586	P17_1	P17	0.0302192
FP003489	18	338.062	78.6498	4.2983	0.0006339	***	0.742908	CFC1B_1	CFC1B	0.0302192
FP001800	20	382.669	91.6854	4.1737	0.0006367	***	0.711408	SH2D2A_1	SH2D2A	0.0302495
FP012764	18	1267.39	289.816	4.3731	0.000637	***	0.759833	LRRC20_1	LRRC20	0.0302495
FP018876	22	194.217	47.6204	4.0784	0.0006405	***	0.683226	COQ9_1	COQ9	0.0303488
FP017979	18	896.296	208.858	4.2914	0.0006428	***	0.742372	COMMD4_1	COMMD4	0.0303488
FP020832	14	288.68	63.1458	4.5716	0.0006417	***	0.79703	CEP192_1	CEP192	0.0303488
FP012475	76	-13625.8	3814.69	-3.5719	0.0006461	***	-0.573178	SPAG6_2	SPAG6	0.0304461
FP013860	18	242.201	56.4982	4.2869	0.0006487	***	0.757981	C11orf94_1	C11orf94	0.0304705
FP025416	15	7927.64	1736.63	4.565	0.0006491	***	0.796605	DNASE1L1_1	DNASE1L1	0.0304705
FP022260	19	251.887	59.6862	4.2202	0.0006505	***	0.725787	ZNF155_1	ZNF155	0.0304779
FP007203	21	-636.323	154.736	-4.1123	0.000654	***	-0.695993	TSLP_3	TSLP	0.03054
FP006168	65	278.211	77.1679	3.6053	0.0006566	***	0.4769	USO1_1	USO1	0.03054
FP022173	18	238.565	55.7301	4.2807	0.0006568	***	0.741541	CCDC97_1	CCDC97	0.03054
FP014775	15	139.88	30.6838	4.5588	0.0006561	***	0.79621	SIAE_1	SIAE	0.03054
FP014847	21	164.653	40.081	4.108	0.0006603	***	0.408355	SNX19_1	SNX19	0.0305868
FP014622	17	1440.5	330.81	4.3545	0.0006603	***	0.75846	DLAT_1	DLAT	0.0305868
FP013291	26	253.19	64.3555	3.9342	0.0006622	***	-0.00644828	BUB3_1	BUB3	0.0306171
FP018568	14	5947.39	1268.93	4.6869	0.0006641	***	0.816294	CRYM_1	CRYM	0.0306198
FP017404	13	155.305	31.9823	4.856	0.0006654	***	0.837978	TDRD9_1	TDRD9	0.0306198
FP018245	15	132.616	28.3055	4.6852	0.000666	***	0.850633	JMJD8_1	JMJD8	0.0306198
FP002743	20	139.155	33.5578	4.1467	0.000675	***	0.709125	POMC_1	POMC	0.0307867
FP007700	17	458.06	105.406	4.3457	0.0006716	***	0.723938	PTTG1_1	PTTG1	0.0307867
FP002708	17	888.861	204.675	4.3428	0.0006753	***	0.757594	LAPTM4A_1	LAPTM4A	0.0307867
FP011210	14	147.106	31.4595	4.676	0.0006759	***	0.81566	ZNF696_1	ZNF696	0.0307867
FP008391	14	363.608	75.0348	4.8459	0.0006755	***	0.837458	CLPSL2_1	CLPSL2	0.0307867
FP013039	21	190.233	46.4373	4.0965	0.0006774	***	0.694613	PYROXD2_1	PYROXD2	0.0307979
FP013452	19	-418.61	99.6918	-4.199	0.0006799	***	-0.72406	SYT8_1	SYT8	0.0308544
FP022950	25	104.973	26.374	3.9801	0.0006813	***	0.655737	ADRA1D_1	ADRA1D	0.0308609
FP001627	17	-23022.5	5320.53	-4.3271	0.0006961	***	-0.756425	S100A12_1	S100A12	0.0309768
FP015136	98	682.99	194.155	3.5178	0.0006876	***	0.309891	PLCZ1_1	PLCZ1	0.0309768
FP012049	21	216.49	53.0289	4.0825	0.0006989	***	0.693377	TTC16_1	TTC16	0.0309768
FP011451	20	726.401	175.862	4.1305	0.000699	***	0.707743	DNAJA1_2	DNAJA1	0.0309768
FP001968	22	6985.48	1689.99	4.1334	0.0006946	***	0.707992	TBX19_1	TBX19	0.0309768
FP007827	19	260.663	62.142	4.1947	0.0006861	***	0.723699	COL23A1_1	COL23A1	0.0309768
FP005380	28	404.893	104.616	3.8703	0.0006908	***	0.726885	CPA3_1	CPA3	0.0309768
FP011818	17	312.591	72.2014	4.3294	0.000693	***	0.756598	BAAT_1	BAAT	0.0309768
FP006813	16	81.9482	18.5535	4.4169	0.0006957	***	0.774665	GOLPH3_1	GOLPH3	0.0309768
FP012582	14	187.871	40.3001	4.6618	0.0006917	***	0.814826	FXYD4_1	FXYD4	0.0309768
FP012781	14	4206.44	902.211	4.6624	0.0006911	***	0.814859	PSAP_1	PSAP	0.0309768
FP007110	11	133.208	24.9625	5.3363	0.0006972	***	0.854118	DHFR_1	DHFR	0.0309768
FP022208	25	374.782	93.6794	4.0007	0.0007024	***	0.667446	ZNF526_1	ZNF526	0.0310714
FP006057	14	133.424	28.6883	4.6508	0.0007042	***	0.814179	NMU_1	NMU	0.031095
FP016636	18	-6302.08	1465.48	-4.3004	0.000733	***	-0.754413	CUL4A_3	CUL4A	0.0313783
FP003538	29	686.186	178.962	3.8343	0.0007192	***	0.668358	ZEB2_1	ZEB2	0.0313783
FP022750	21	2034.27	500.538	4.0642	0.000728	***	0.691754	CCDC106_1	CCDC106	0.0313783
FP006196	22	638.515	156.928	4.0688	0.0007205	***	0.69217	ANXA3_1	ANXA3	0.0313783
FP005375	21	156.101	38.3307	4.0725	0.0007147	***	0.692492	ZIC4_2	ZIC4	0.0313783
FP006185	21	11223.4	2723.55	4.1209	0.0007138	***	0.706915	SHROOM3_1	SHROOM3	0.0313783
FP023640	20	171.24	41.1457	4.1618	0.0007349	***	0.720983	DONSON_3	DONSON	0.0313783
FP000266	18	3626.24	843.244	4.3004	0.000733	***	0.754413	ZBTB17_1	ZBTB17	0.0313783
FP003086	17	4083.49	949.572	4.3003	0.0007331	***	0.754413	ADD2_3	ADD2	0.0313783
FP017446	17	3495.04	812.734	4.3003	0.0007331	***	0.754413	TUBGCP5_1	TUBGCP5	0.0313783
FP023953	17	7813.87	1817.03	4.3003	0.0007331	***	0.754413	ADORA2A_4	ADORA2A	0.0313783
FP023735	17	330.735	76.8785	4.302	0.0007306	***	0.754541	ABCG1_2	ABCG1	0.0313783
FP001856	17	225.888	52.4467	4.307	0.0007237	***	0.754915	ATP1A4_1	ATP1A4	0.0313783
FP022153	17	335.207	77.7148	4.3133	0.0007149	***	0.755389	MIA_1	MIA	0.0313783
FP016658	17	3845.19	875.531	4.3918	0.0007285	***	0.772901	UPF3A_3	UPF3A	0.0313783
FP014583	14	151.414	32.7002	4.6304	0.000728	***	0.812968	ACAT1_1	ACAT1	0.0313783
FP017904	14	1377.37	297.124	4.6357	0.0007217	***	0.813283	UACA_1	UACA	0.0313783
FP018763	15	208.129	46.3124	4.494	0.0007342	***	0.814708	ZNF843_1	ZNF843	0.0313783
FP006675	27	162.505	41.9991	3.8693	0.0007327	***	0.852388	ING2_1	ING2	0.0313783
FP009577	20	258.312	62.9521	4.1033	0.0007414	***	0.705403	ZPBP_1	ZPBP	0.0314372
FP023922	15	439.085	97.7834	4.4904	0.0007389	***	0.791775	LL22NC03-63E9.3_1	LL22NC03-63E9.3	0.0314372
FP005149	14	320.783	69.4136	4.6213	0.0007388	***	0.812429	PARP15_2	PARP15	0.0314372
FP023189	13	2845.51	594.703	4.7848	0.0007404	***	0.834262	EPB41L1_1	EPB41L1	0.0314372
FP007312	14	122.188	27.2374	4.486	0.0007446	***	0.791487	P4HA2_1	P4HA2	0.0315184
FP011559	19	124.727	30.0215	4.1546	0.0007461	***	0.720381	IGFBPL1_1	IGFBPL1	0.0315275
FP005020	22	6344.55	1565.93	4.0516	0.0007486	***	0.690639	BBX_2	BBX	0.0315788
FP007179	16	310.05	70.8503	4.3761	0.0007499	***	0.771785	FAM174A_1	FAM174A	0.0315794
FP009008	17	334.431	78.0024	4.2874	0.0007516	***	0.753435	IFNGR1_2	IFNGR1	0.0315968
FP007168	19	202.666	48.8371	4.1498	0.0007536	***	0.719986	CAST_5	CAST	0.0316267
FP018238	17	143.328	33.4516	4.2847	0.0007557	***	0.753223	WFIKKN1_1	WFIKKN1	0.0316607
FP000925	12	152.529	30.6381	4.9784	0.0007611	***	0.856509	LRP8_2	LRP8	0.0318327
FP004644	21	2104.85	520.619	4.043	0.0007632	***	0.689867	CAMP_1	CAMP	0.0318662
FP014928	14	3435.39	747.066	4.5985	0.0007668	***	0.793004	PLEKHG6_2	PLEKHG6	0.0319622
FP018446	20	91.1058	22.0085	4.1396	0.00077	***	0.742959	METTL22_1	METTL22	0.0320324
FP001236	18	4060	950.081	4.2733	0.0007724	***	0.752359	AMY2A_1	AMY2A	0.0320324
FP007782	16	319.25	73.217	4.3603	0.0007721	***	0.770655	CDHR2_1	CDHR2	0.0320324
FP002001	17	-3539.65	812.928	-4.3542	0.0007809	***	-0.770215	PRRC2C_2	PRRC2C	0.0323303
FP009049	14	-15580.9	3397.87	-4.5855	0.0007833	***	-0.810269	EPM2A_3	EPM2A	0.0323751
FP022696	14	1732.32	377.988	4.583	0.0007865	***	0.810118	KIR2DL4_3	KIR2DL4	0.0324527
FP002909	14	4685.26	1022.77	4.5809	0.0007891	***	0.809993	MTA3_4	MTA3	0.0325054
FP011743	19	478.997	116.13	4.1247	0.0007944	***	0.648559	FBP2_1	FBP2	0.0325844
FP016883	19	251.466	60.9588	4.1252	0.0007935	***	0.717916	SEC23A_1	SEC23A	0.0325844
FP006714	7	1312.06	181.737	7.2195	0.000795	***	0.959844	F11_1	F11	0.0325844
FP022967	23	299.404	75.2171	3.9805	0.000801	***	0.717077	CHGB_1	CHGB	0.0326125
FP019405	17	753.365	173.537	4.3412	0.0007998	***	0.769279	AIPL1_1	AIPL1	0.0326125
FP019394	15	280.624	63.1321	4.445	0.0007998	***	0.788763	C1QBP_1	C1QBP	0.0326125
FP012568	14	125.909	27.5283	4.5738	0.0007984	***	0.809558	ZNF248_2	ZNF248	0.0326125
FP003836	19	50.4451	12.2455	4.1195	0.0008031	***	0.717435	COQ10B_1	COQ10B	0.0326439
FP012202	19	2833.69	689.197	4.1116	0.0008165	***	0.392516	ADAMTS13_1	ADAMTS13	0.0327133
FP004068	22	206.081	51.3157	4.0159	0.0008105	***	0.687438	EPHA4_1	EPHA4	0.0327133
FP011756	18	974.721	233.255	4.1788	0.0008068	***	0.733433	ERCC6L2_1	ERCC6L2	0.0327133
FP020720	17	1709.73	402.656	4.2461	0.0008142	***	0.75027	SLC16A3_4	SLC16A3	0.0327133
FP002306	19	1581.14	384.37	4.1136	0.0008131	***	0.750737	LAMB3_2	LAMB3	0.0327133
FP010121	17	81.0899	18.728	4.3299	0.0008168	***	0.768456	FLNC_1	FLNC	0.0327133
FP018437	13	652.756	143.139	4.5603	0.0008163	***	0.808732	NAGPA_1	NAGPA	0.0327133
FP018484	10	282.685	45.5597	6.2047	0.0008083	***	0.930142	TXNDC11_1	TXNDC11	0.0327133
FP002599	5	511.883	36.9125	13.8675	0.0008117	***	0.99229	OR2T11_1	OR2T11	0.0327133
FP015965	19	287.825	70.0199	4.1106	0.0008182	***	0.716684	MVK_1	MVK	0.032716
FP024133	20	620.689	153.063	4.0551	0.0008229	***	0.37364	IL2RB_1	IL2RB	0.0327201
FP023980	27	385.301	100.805	3.8223	0.0008246	***	0.615137	CRYBA4_1	CRYBA4	0.0327201
FP005144	21	167.291	41.2715	4.0534	0.0008259	***	0.701055	KPNA1_1	KPNA1	0.0327201
FP017413	19	77.6756	18.9157	4.1064	0.0008254	***	0.716327	SIVA1_1	SIVA1	0.0327201
FP006667	16	350.74	81.1219	4.3236	0.0008263	***	0.768	RP11-389E17.1_1	RP11-389E17.1	0.0327201
FP008135	13	291.984	61.9078	4.7164	0.0008209	***	0.830585	ZNF311_1	ZNF311	0.0327201
FP001074	16	26672	6299.93	4.2337	0.0008341	***	0.67128	ASB17_1	ASB17	0.0329347
FP006878	16	320.708	74.2661	4.3184	0.0008344	***	0.763008	PRKAA1_1	PRKAA1	0.0329347
FP020401	23	1474.1	375.686	3.9238	0.0008408	***	0.659518	SCN4A_1	SCN4A	0.0330809
FP006233	21	870.752	217.679	4.0002	0.0008395	***	0.68601	MRPS18C_1	MRPS18C	0.0330809
FP003508	19	221.132	53.2096	4.1559	0.000845	***	0.731567	LYPD1_2	LYPD1	0.0331127
FP011498	15	3171.54	719.103	4.4104	0.0008497	***	0.786425	C9orf131_1	C9orf131	0.0331127
FP011132	15	213.898	48.4627	4.4137	0.0008449	***	0.786645	NDUFB9_1	NDUFB9	0.0331127
FP013505	14	103.424	22.0204	4.6967	0.0008458	***	0.829504	STIM1_1	STIM1	0.0331127
FP005584	12	205.656	41.9852	4.8983	0.0008496	***	0.852771	CAMK2N2_1	CAMK2N2	0.0331127
FP013790	6	5756.15	640.624	8.9852	0.0008492	***	0.965611	CD59_2	CD59	0.0331127
FP014390	20	336.576	83.324	4.0394	0.0008514	***	0.699817	XRRA1_1	XRRA1	0.0331244
FP011556	16	439.439	102.038	4.3066	0.0008527	***	0.766758	SLC25A51_1	SLC25A51	0.0331244
FP013553	16	153.281	35.5991	4.3058	0.0008541	***	0.766694	RRP8_1	RRP8	0.0331264
FP019496	27	315.064	82.2517	3.8305	0.0008562	***	0.725716	ALOX12B_1	ALOX12B	0.0331555
FP021017	20	263.157	64.4088	4.0857	0.000862	***	0.714564	CCDC68_1	CCDC68	0.0333214
FP021319	18	276.279	66.6481	4.1453	0.0008632	***	0.730704	EBI3_1	EBI3	0.0333214
FP003816	21	1985.7	498.25	3.9853	0.0008677	***	0.684661	STAT4_1	STAT4	0.0334425
FP006644	17	1404.47	333.868	4.2067	0.0008791	***	0.48935	AADAT_1	AADAT	0.0338288
FP001033	17	2261.14	537.995	4.2029	0.0008855	***	0.746903	C1orf141_1	C1orf141	0.0340218
FP005445	19	1194.91	289.416	4.1287	0.0008928	***	0.729331	CCNL1_1	CCNL1	0.0341156
FP013313	18	344.245	83.3768	4.1288	0.0008926	***	0.729339	BCCIP_1	BCCIP	0.0341156
FP019024	13	237.899	52.8054	4.5052	0.0008935	***	0.805312	HAS3_2	HAS3	0.0341156
FP012567	9	492.815	80.8822	6.093	0.0008896	***	0.838712	MTRNR2L7_1	MTRNR2L7	0.0341156
FP018872	21	519.216	130.877	3.9672	0.0009034	***	0.683001	CCL22_1	CCL22	0.0341372
FP018061	22	1761.29	443.74	3.9692	0.0008995	***	0.683183	IL16_5	IL16	0.0341372
FP019556	17	330.383	78.7184	4.197	0.0008957	***	0.746441	ELAC2_2	ELAC2	0.0341372
FP021991	26	272.806	71.125	3.8356	0.0008999	***	0.779934	ALKBH6_1	ALKBH6	0.0341372
FP005703	14	166.95	37.1143	4.4983	0.0009038	***	0.804875	CEP19_1	CEP19	0.0341372
FP021925	6	263.01	29.7069	8.8535	0.0008987	***	0.967994	PDCD2L_1	PDCD2L	0.0341372
FP000043	3	395.033	0.560542	704.73	0.0009033	***	0.999998	ATAD3B_1	ATAD3B	0.0341372
FP024170	21	73.9607	18.444	4.01	0.0009073	***	0.697208	MAFF_2	MAFF	0.0342168
FP012212	17	243.457	58.1399	4.1874	0.0009126	***	0.561941	SARDH_2	SARDH	0.0343112
FP024997	22	371.428	94.6534	3.9241	0.0009113	***	0.669066	TMSB15A_1	TMSB15A	0.0343112
FP021375	18	344.903	83.8404	4.1138	0.0009202	***	0.728097	GTF2F1_3	GTF2F1	0.0343341
FP015997	17	276.695	66.1017	4.1859	0.0009153	***	0.745563	FAM109A_1	FAM109A	0.0343341
FP019331	12	86.4078	18.6077	4.6437	0.0009169	***	0.826546	SHPK_1	SHPK	0.0343341
FP014260	10	811.178	147.797	5.4885	0.0009177	***	0.900799	CLCF1_2	CLCF1	0.0343341
FP000089	5	443.68	33.3752	13.2937	0.0009199	***	0.991619	ARHGEF16_2	ARHGEF16	0.0343341
FP018134	17	294.494	70.4267	4.1816	0.0009231	***	0.745219	AP3S2_1	AP3S2	0.0343379
FP021571	15	1642.73	376.458	4.3636	0.0009224	***	0.783211	ZNF433_1	ZNF433	0.0343379
FP019982	18	-30290.7	7370.4	-4.1098	0.0009277	***	-0.734709	KRT37_1	KRT37	0.034401
FP015977	20	-958.681	239.725	-3.9991	0.0009291	***	-0.696228	C12orf76_1	C12orf76	0.034401
FP020882	21	386.694	97.7848	3.9545	0.0009293	***	0.681834	AQP4_2	AQP4	0.034401
FP014177	18	383.082	91.702	4.1775	0.0009304	***	0.746012	MAP3K11_3	MAP3K11	0.034401
FP003050	90	298.875	86.9966	3.4355	0.0009355	***	0.419382	MEIS1_1	MEIS1	0.0344375
FP005491	63	205.893	58.8617	3.4979	0.0009364	***	0.562602	MECOM_4	MECOM	0.0344375
FP012520	21	409.045	103.551	3.9502	0.0009384	***	0.618345	LYZL1_1	LYZL1	0.0344375
FP007567	22	11501.2	2940.42	3.9114	0.000938	***	0.667872	SPINK9_1	SPINK9	0.0344375
FP021236	14	100.406	22.4311	4.4762	0.0009373	***	0.803478	MOB3A_1	MOB3A	0.0344375
FP024801	17	134.404	32.2374	4.1692	0.0009455	***	0.744237	FAM104B_1	FAM104B	0.0346462
FP022232	21	293.194	74.3278	3.9446	0.0009501	***	0.600751	TEX101_1	TEX101	0.0347034
FP002991	18	18445.6	4427.58	4.1661	0.0009513	***	0.743986	CCDC88A_2	CCDC88A	0.0347034
FP012078	9	144.23	23.9702	6.017	0.0009503	***	0.926194	PTGES2_1	PTGES2	0.0347034
FP007805	19	1182.76	288.903	4.094	0.0009579	***	0.72644	F12_1	F12	0.0348923
FP008756	16	167.498	39.4996	4.2405	0.0009641	***	0.761839	LYRM2_1	LYRM2	0.0350142
FP022762	15	163.963	37.7859	4.3393	0.0009629	***	0.78151	NLRP5_1	NLRP5	0.0350142
FP001602	30	252.357	67.1615	3.7575	0.0009702	***	0.547627	KPRP_1	KPRP	0.035079
FP011991	17	9153.09	2202.36	4.156	0.0009701	***	0.743185	RC3H2_2	RC3H2	0.035079
FP013316	16	161.775	38.1877	4.2363	0.0009716	***	0.761523	DHX32_1	DHX32	0.035079
FP009845	13	247.928	55.6561	4.4546	0.0009712	***	0.802101	PTCD1_1	PTCD1	0.035079
FP025112	21	-1693.35	420.464	-4.0273	0.0009744	***	-0.672073	DOCK11_2	DOCK11	0.0351285
FP008782	20	-1044.31	262.73	-3.9749	0.000979	***	-0.402078	SIM1_1	SIM1	0.0351742
FP017093	15	2123.35	490.488	4.3291	0.0009803	***	0.287175	SRSF5_1	SRSF5	0.0351742
FP011570	16	268.889	63.5388	4.2319	0.0009796	***	0.761189	CNTNAP3B_1	CNTNAP3B	0.0351742
FP011834	15	349.634	78.5991	4.4483	0.0009814	***	0.801694	NIPSNAP3B_1	NIPSNAP3B	0.0351742
FP005145	20	148.423	37.3894	3.9697	0.0009902	***	0.693575	PARP9_2	PARP9	0.0354379
FP012358	16	12269.8	2903.86	4.2253	0.0009917	***	0.760692	AKR1C2_2	AKR1C2	0.0354399
FP004642	17	405.254	97.8222	4.1428	0.0009955	***	0.74212	MAP4_1	MAP4	0.035524
FP015822	20	2543.92	641.399	3.9662	0.0009977	***	0.693262	CRADD_1	CRADD	0.0355508
FP024316	20	147.995	37.3309	3.9644	0.001002	**	0.6931	KIAA0930_3	KIAA0930	0.0355848
FP000284	19	417.4	105.277	3.9648	0.001001	**	0.693132	CROCC_2	CROCC	0.0355848
FP023506	16	210.674	49.9332	4.2191	0.001003	**	0.760222	C20orf195_1	C20orf195	0.0355848
FP007051	24	1317.45	342.552	3.846	0.001008	**	0.652034	ARHGEF28_2	ARHGEF28	0.0357105
FP002672	16	-1528.6	362.781	-4.2136	0.0010136	**	-0.759797	GREB1_2	GREB1	0.0358071
FP017385	21	-578.844	146.239	-3.9582	0.0010151	**	-0.692534	CDC42BPB_2	CDC42BPB	0.0358071
FP001471	18	307.489	75.6354	4.0654	0.001015	**	0.724035	GJA5_2	GJA5	0.0358071
FP017810	14	67.0769	14.6593	4.5757	0.001017	**	0.822657	DAPK2_1	DAPK2	0.0358226
FP007121	20	3366.24	850.823	3.9564	0.001019	**	0.751432	XRCC4_1	XRCC4	0.0358416
FP022675	14	7417.32	1676.51	4.4243	0.001021	**	0.800137	LILRB5_1	LILRB5	0.0358606
FP021211	16	78.6173	18.7035	4.2033	0.001033	**	0.759018	C19orf25_1	C19orf25	0.0362303
FP007922	16	116.679	27.776	4.2007	0.001038	**	0.758816	C6orf201_1	C6orf201	0.0363537
FP001789	26	217.916	57.7324	3.7746	0.001043	**	0.626947	ISG20L2_2	ISG20L2	0.0363731
FP021563	21	289.091	74.0672	3.9031	0.001042	**	0.677043	ZNF441_1	ZNF441	0.0363731
FP021864	20	837.865	212.344	3.9458	0.001043	**	0.691401	ZNF43_2	ZNF43	0.0363731
FP009572	17	4616.5	1121.69	4.1157	0.00105	**	0.739927	SUN3_1	SUN3	0.0365653
FP014058	23	153.305	39.7168	3.8599	0.001055	**	0.66296	C11orf48_1	C11orf48	0.0366184
FP022406	16	289.736	69.1263	4.1914	0.001056	**	0.758101	PLA2G4C_1	PLA2G4C	0.0366184
FP016411	12	201.837	42.5541	4.7431	0.001054	**	0.845137	SLC25A30_1	SLC25A30	0.0366184
FP005205	15	331.463	79.1134	4.1897	0.00106	**	0.757971	MGLL_3	MGLL	0.0367053
FP011673	21	-6481.91	1646.79	-3.9361	0.001065	**	-0.690512	ZCCHC6_2	ZCCHC6	0.0367575
FP002782	19	92.9057	23.3167	3.9845	0.001066	**	0.705734	PREB_1	PREB	0.0367575
FP017734	14	1599.54	363.665	4.3984	0.001066	**	0.798443	ARPP19_2	ARPP19	0.0367575
FP011460	19	144.791	35.8446	4.0394	0.00107	**	0.721821	AQP3_1	AQP3	0.0368437
FP007990	12	304.288	67.0588	4.5376	0.001079	**	0.820425	DTNBP1_1	DTNBP1	0.0371016
FP017625	19	1415.81	355.987	3.9771	0.001083	**	0.705077	LCMT2_1	LCMT2	0.0371351
FP008109	18	1930.32	478.526	4.0339	0.001082	**	0.721348	HIST1H3I_1	HIST1H3I	0.0371351
FP003774	23	102.519	26.652	3.8466	0.001088	**	0.661672	DNAJC10_1	DNAJC10	0.0372545
FP017770	22	113.961	29.3663	3.8807	0.001096	**	0.674929	ALDH1A2_2	ALDH1A2	0.0373366
FP021185	17	348.854	85.2446	4.0924	0.001098	**	0.691586	ABCA7_2	ABCA7	0.0373366
FP007335	21	134.296	33.8191	3.971	0.001097	**	0.70453	AFF4_1	AFF4	0.0373366
FP004458	15	224.497	52.6166	4.2667	0.001095	**	0.776342	CMTM7_1	CMTM7	0.0373366
FP017430	7	205.893	30.5585	6.7377	0.001092	**	0.949098	BRF1_2	BRF1	0.0373366
FP011348	21	511.369	131.999	3.874	0.001112	**	0.674301	RANBP6_1	RANBP6	0.0377603
FP010072	16	-3748.58	900.613	-4.1623	0.0011154	**	-0.755846	CPED1_4	CPED1	0.0377734
FP009332	39	368.301	103.42	3.5612	0.001116	**	0.672429	ETV1_1	ETV1	0.0377734
FP003198	26	192.4	50.9947	3.7729	0.001117	**	0.727546	MAT2A_3	MAT2A	0.0377734
FP019780	21	3469.68	896.774	3.8691	0.001124	**	0.673828	CCL1_1	CCL1	0.0377785
FP013755	20	20121	5147.09	3.9092	0.001129	**	0.688032	FSHB_2	FSHB	0.0377785
FP012641	20	1496.56	382.738	3.9101	0.001127	**	0.688119	CHAT_1	CHAT	0.0377785
FP020485	13	203.622	46.6039	4.3692	0.001119	**	0.691096	KIF19_1	KIF19	0.0377785
FP005299	18	123.829	30.8633	4.0122	0.001131	**	0.719477	SLC35G2_1	SLC35G2	0.0377785
FP025201	18	106.16	26.446	4.0142	0.001126	**	0.719654	IGSF1_1	IGSF1	0.0377785
FP021383	17	209.412	51.3593	4.0774	0.001131	**	0.73679	DENND1C_1	DENND1C	0.0377785
FP007830	17	212.929	51.202	4.1586	0.001123	**	0.75556	ZNF354B_1	ZNF354B	0.0377785
FP004041	15	62.2112	14.6293	4.2525	0.001122	**	0.775315	ZFAND2B_1	ZFAND2B	0.0377785
FP012355	15	99.6917	23.4744	4.2468	0.001134	**	0.774902	PITRM1_1	PITRM1	0.0378092
FP021137	8	110.703	19.0327	5.8165	0.001135	**	0.92161	PQLC1_1	PQLC1	0.0378092
FP000572	21	111.6	28.585	3.9042	0.001141	**	0.687565	TMEM234_1	TMEM234	0.0379576
FP005464	38	203.781	57.2323	3.5606	0.001148	**	0.66287	C3orf80_1	C3orf80	0.0381388
FP000746	21	671.321	172.178	3.899	0.001154	**	0.687084	PPIH_1	PPIH	0.0381647
FP003240	20	1565.45	396.505	3.9481	0.001151	**	0.702477	FABP1_1	FABP1	0.0381647
FP000336	15	141.129	33.3053	4.2374	0.001153	**	0.774216	UBXN10_1	UBXN10	0.0381647
FP025424	11	128.901	27.553	4.6784	0.001155	**	0.871647	SLC10A3_1	SLC10A3	0.0381647
FP000082	12	151.508	33.7377	4.4908	0.00116	**	0.817625	FAM213B_1	FAM213B	0.0382784
FP009303	20	309.452	78.4674	3.9437	0.001162	**	0.702078	RSPH10B2_1	RSPH10B2	0.038293
FP011934	20	5358.28	1375.93	3.8943	0.001166	**	0.686647	DFNB31_2	DFNB31	0.0383219
FP005565	20	5115.22	1297.59	3.9421	0.001166	**	0.701932	KLHL24_2	KLHL24	0.0383219
FP013964	12	-5316.07	1185.08	-4.4858	0.0011684	**	-0.817328	GLYATL2_1	GLYATL2	0.0383494
FP000710	9	288.255	49.8495	5.7825	0.00117	**	0.920793	COL9A2_1	COL9A2	0.0383507
FP009282	14	303.723	67.7681	4.4818	0.001176	**	0.817084	FSCN1_1	FSCN1	0.038496
FP006989	22	5845.12	1521.33	3.8421	0.001194	**	0.613333	NLN_2	NLN	0.0388778
FP000995	27	179.568	48.5821	3.6962	0.001192	**	0.649745	ALG6_1	ALG6	0.0388778
FP006379	20	558.949	143.937	3.8833	0.001194	**	0.685619	RPL34_1	RPL34	0.0388778
FP009716	14	182.159	43.1883	4.2178	0.001194	**	0.739409	GNAI1_1	GNAI1	0.0388778
FP010637	16	2216.58	537.382	4.1248	0.001196	**	0.752905	EXTL3_1	EXTL3	0.0388914
FP001287	17	195.434	48.2781	4.0481	0.001198	**	0.734354	GSTM2_1	GSTM2	0.0389049
FP019653	19	1174.6	299.008	3.9283	0.0012	**	0.459621	SLC47A2_1	SLC47A2	0.0389184
FP004291	18	-608.511	150.444	-4.0448	0.001206	**	-0.734078	RAD18_1	RAD18	0.0389341
FP010020	87	-5512.74	1639.76	-3.3619	0.0012076	**	-0.380765	DOCK4_4	DOCK4	0.0389341
FP003546	16	254.986	61.9104	4.1186	0.00121	**	0.665315	KIF5C_1	KIF5C	0.0389341
FP002769	16	898.533	218.059	4.1206	0.001206	**	0.752574	CENPA_1	CENPA	0.0389341
FP001726	15	6988.59	1659.85	4.2104	0.001209	**	0.772224	PKLR_1	PKLR	0.0389341
FP011212	12	93.1723	20.0465	4.6478	0.001206	**	0.840181	TOP1MT_1	TOP1MT	0.0389341
FP005513	26	323.876	87.7953	3.689	0.001214	**	0.68207	PLD1_1	PLD1	0.0390117
FP014770	14	3049.67	724.829	4.2074	0.001216	**	0.772006	OR8D4_1	OR8D4	0.0390249
FP002445	16	254.383	61.8239	4.1146	0.001219	**	0.752103	ZNF678_1	ZNF678	0.0390701
FP000086	14	-3833.26	892.76	-4.2937	0.0012692	**	-0.791396	ACTRT2_1	ACTRT2	0.0390724
FP023363	17	-2683.87	654.493	-4.1007	0.001252	**	-0.750991	CSE1L_1	CSE1L	0.0390724
FP004762	17	-3992.46	993.134	-4.0201	0.0012653	**	-0.732	IQCF1_1	IQCF1	0.0390724
FP008453	19	367.768	92.8675	3.9601	0.001257	**	0.216289	TREML2_1	TREML2	0.0390724
FP017551	23	298.048	78.6236	3.7908	0.001235	**	0.417998	C15orf52_1	C15orf52	0.0390724
FP006407	40	356.984	101.296	3.5242	0.001269	**	0.572098	ANK2_1	ANK2	0.0390724
FP023607	21	10392.7	2722.64	3.8171	0.001262	**	0.668845	TIAM1_2	TIAM1	0.0390724
FP022244	21	1018.75	266.296	3.8256	0.001239	**	0.669667	ZNF576_2	ZNF576	0.0390724
FP015827	22	5483.42	1432.23	3.8286	0.00123	**	0.669952	TMCC3_2	TMCC3	0.0390724
FP013642	20	2704.72	698.949	3.8697	0.00123	**	0.684344	MICALCL_1	MICALCL	0.0390724
FP004161	19	228.536	58.3655	3.9156	0.001233	**	0.699527	ATG16L1_1	ATG16L1	0.0390724
FP019853	18	156.211	39.8925	3.9158	0.001232	**	0.699546	TBC1D3F_3	TBC1D3F	0.0390724
FP009598	18	316.23	79.813	3.9621	0.001252	**	0.715107	VOPP1_2	VOPP1	0.0390724
FP020346	17	6125.7	1523.43	4.021	0.001263	**	0.732078	USP32_2	USP32	0.0390724
FP019940	18	366.797	91.0692	4.0277	0.001247	**	0.732642	KRT26_1	KRT26	0.0390724
FP014181	18	2843.83	705.979	4.0282	0.001245	**	0.732686	PCNXL3_2	PCNXL3	0.0390724
FP012797	17	1048.58	260.217	4.0296	0.001242	**	0.732807	P4HA1_2	P4HA1	0.0390724
FP010721	17	281.942	68.8838	4.093	0.00127	**	0.750377	SFRP1_1	SFRP1	0.0390724
FP020228	17	289.185	70.5945	4.0964	0.001262	**	0.75065	SPOP_2	SPOP	0.0390724
FP002251	16	356.773	87.0213	4.0998	0.001254	**	0.750923	RBBP5_2	RBBP5	0.0390724
FP017330	16	628.153	153.183	4.1007	0.001252	**	0.750991	GSKIP_1	GSKIP	0.0390724
FP013001	17	413.827	100.881	4.1021	0.001248	**	0.751106	PIK3AP1_2	PIK3AP1	0.0390724
FP015291	16	307.345	74.886	4.1042	0.001243	**	0.75127	RAPGEF3_5	RAPGEF3	0.0390724
FP009630	16	67.1405	16.3305	4.1114	0.001227	**	0.751842	SBDS_1	SBDS	0.0390724
FP022503	16	10787.7	2623.39	4.1121	0.001225	**	0.751901	CPT1C_2	CPT1C	0.0390724
FP001217	16	157.388	37.5839	4.1876	0.001259	**	0.770534	HIAT1_1	HIAT1	0.0390724
FP009164	15	127.327	29.655	4.2936	0.001269	**	0.791389	SLC22A3_1	SLC22A3	0.0390724
FP025336	14	183.382	42.6914	4.2955	0.001265	**	0.791521	MAGEA4_1	MAGEA4	0.0390724
FP013792	14	200.524	46.4944	4.3129	0.001229	**	0.79271	FBXO3_2	FBXO3	0.0390724
FP009200	12	462.957	104.026	4.4504	0.001234	**	0.815167	WDR27_1	WDR27	0.0390724
FP019014	13	189.042	40.9092	4.621	0.001253	**	0.838746	SLC7A6_1	SLC7A6	0.0390724
FP008191	6	524.223	64.2136	8.1637	0.001226	**	0.961619	GTF2H4_2	GTF2H4	0.0390724
FP006822	18	176.671	43.9819	4.0169	0.001273	**	0.731733	SLC45A2_1	SLC45A2	0.0391157
FP022194	23	226.988	60.142	3.7742	0.001283	**	0.654582	RPS19_2	RPS19	0.0391719
FP009555	21	1287.71	337.969	3.8101	0.001282	**	0.668167	MYO1G_1	MYO1G	0.0391719
FP015497	19	9705.78	2490.45	3.8972	0.001281	**	0.697843	SMUG1_1	SMUG1	0.0391719
FP010785	18	356.49	88.8621	4.0117	0.001286	**	0.731293	TMEM68_2	TMEM68	0.0391719
FP018177	17	383.633	95.6247	4.0119	0.001286	**	0.731306	SPATA8_1	SPATA8	0.0391719
FP002633	17	2086.62	519.791	4.0143	0.00128	**	0.731517	RSAD2_1	RSAD2	0.0391719
FP022256	12	16516.9	3733.14	4.4244	0.001285	**	0.813561	ZNF404_1	ZNF404	0.0391719
FP021435	17	602.736	150.28	4.0108	0.001289	**	0.731213	TIMM44_1	TIMM44	0.0392147
FP011598	19	132.768	34.1073	3.8927	0.001294	**	0.697426	SMC5_1	SMC5	0.0392332
FP024115	16	129.626	31.7448	4.0834	0.001293	**	0.749603	FOXRED2_2	FOXRED2	0.0392332
FP005806	15	127.715	30.6171	4.1714	0.001296	**	0.769312	GRK4_1	GRK4	0.0392332
FP003263	16	3664.73	878.448	4.1718	0.001295	**	0.769346	STARD7_2	STARD7	0.0392332
FP021011	22	3118.6	827.784	3.7674	0.001303	**	0.653909	STARD6_1	STARD6	0.0392997
FP016395	22	238.758	63.3708	3.7676	0.001302	**	0.653932	ENOX1_2	ENOX1	0.0392997
FP007803	17	340.981	85.1121	4.0063	0.0013	**	0.73083	SLC34A1_1	SLC34A1	0.0392997
FP013688	20	80.8482	20.7913	3.8886	0.001305	**	0.697048	SERGEF_1	SERGEF	0.0393117
FP015155	18	-1393.84	348.185	-4.0032	0.0013079	**	-0.730567	GOLT1B_1	GOLT1B	0.0393508
FP024580	17	297.493	74.3519	4.0012	0.001313	**	0.730395	DCAF8L1_1	DCAF8L1	0.0393595
FP012293	16	85.0748	20.8758	4.0753	0.001313	**	0.748951	DPP7_1	DPP7	0.0393595
FP021933	13	219.09	49.6585	4.4119	0.00131	**	0.812783	ZNF30_1	ZNF30	0.0393595
FP011985	18	260.988	66.3013	3.9364	0.00132	**	0.712825	PTGS1_3	PTGS1	0.0395211
FP001248	20	408.667	106.637	3.8323	0.001334	**	0.680807	NBPF4_1	NBPF4	0.0396982
FP023897	20	3271.92	853.604	3.8331	0.001332	**	0.680877	AIFM3_2	AIFM3	0.0396982
FP004249	11	203.419	42.2696	4.8124	0.001334	**	0.687467	SEPT2_2	42980	0.0396982
FP022071	16	505.382	126.566	3.993	0.001334	**	0.729702	LGALS7_1	LGALS7	0.0396982
FP003102	16	155.568	37.4306	4.1562	0.001332	**	0.768164	ZNF638_2	ZNF638	0.0396982
FP015247	17	-4518.27	1132.48	-3.9897	0.001343	**	-0.729419	C12orf40_1	C12orf40	0.0399177
FP013016	24	120.6	32.4074	3.7214	0.001348	**	0.639637	EXOSC1_1	EXOSC1	0.0399695
FP002404	17	200.614	49.3961	4.0613	0.001347	**	0.747823	CAPN2_2	CAPN2	0.0399695
FP014682	18	1050.29	267.582	3.9251	0.00135	**	0.646374	FXYD6_1	FXYD6	0.0399805
FP005789	17	135.806	34.085	3.9844	0.001357	**	0.72896	RNF4_2	RNF4	0.0401394
FP014776	15	97.0683	23.9386	4.0549	0.001364	**	0.7473	SPA17_1	SPA17	0.0402979
FP013924	11	362.619	79.5547	4.5581	0.00137	**	0.835312	FOLH1_1	FOLH1	0.0404265
FP013432	17	375.642	94.4259	3.9782	0.001374	**	0.728429	TSPAN4_4	TSPAN4	0.0404959
FP002624	18	132.172	33.7778	3.913	0.001384	**	0.710731	RNASEH1_1	RNASEH1	0.0407417
FP004677	18	294.528	74.2358	3.9675	0.001403	**	0.727507	P4HTM_1	P4HTM	0.0412516
FP019692	21	276.292	73.319	3.7684	0.001407	**	0.66408	SARM1_2	SARM1	0.0412703
FP019221	16	296.331	73.3805	4.0383	0.001407	**	0.745943	SLC22A31_1	SLC22A31	0.0412703
FP008176	16	87.196	21.597	4.0374	0.001409	**	0.745873	NRM_1	NRM	0.0412797
FP003784	20	708.537	183.991	3.8509	0.001413	**	0.693557	ZSWIM2_1	ZSWIM2	0.0413475
FP009400	22	965.5	258.856	3.7299	0.00142	**	0.701754	SNX10_3	SNX10	0.0414043
FP006611	17	471.479	119.021	3.9613	0.00142	**	0.726976	TKTL2_1	TKTL2	0.0414043
FP000061	8	97.9037	17.5788	5.5694	0.00142	**	0.915379	NADK_3	NADK	0.0414043
FP019691	14	140.505	32.2319	4.3592	0.001423	**	0.448856	SARM1_1	SARM1	0.0414117
FP001222	6	444.72	56.7021	7.8431	0.001427	**	0.950666	RTCA_1	RTCA	0.0414117
FP007062	6	11901.1	1517.4	7.8431	0.001427	**	0.950666	FAM169A_1	FAM169A	0.0414117
FP022884	6	739.903	94.3382	7.8431	0.001427	**	0.950666	NSFL1C_1	NSFL1C	0.0414117
FP025265	95	1173.12	355.817	3.297	0.001434	**	0.252591	ARHGEF6_1	ARHGEF6	0.0414536
FP016657	20	320.87	84.4704	3.7986	0.0014352	**	0.677574	UPF3A_2	UPF3A	0.0414536
FP018801	20	1367.43	355.702	3.8443	0.001432	**	0.692936	ADCY7_2	ADCY7	0.0414536
FP008725	14	114.796	27.8897	4.1161	0.001431	**	0.765101	NT5E_1	NT5E	0.0414536
FP016714	33	143.853	40.8454	3.5219	0.001439	**	0.640126	RAB2B_2	RAB2B	0.0414658
FP018097	17	175.839	44.4598	3.955	0.001438	**	0.72643	PDE8A_1	PDE8A	0.0414658
FP002889	17	609.457	154.142	3.9539	0.001441	**	0.72633	MORN2_1	MORN2	0.0414748
FP013157	19	-696.808	181.455	-3.8401	0.0014451	**	-0.692543	ITPRIP_2	ITPRIP	0.0414955
FP022248	18	345.71	87.459	3.9528	0.001444	**	0.726238	PLAUR_1	PLAUR	0.0414955
FP002337	21	15672.2	4130.3	3.7945	0.001448	**	0.677172	PPP2R5A_2	PPP2R5A	0.0415302
FP010397	13	3000.35	690.412	4.3457	0.001453	**	0.808582	ESYT2_4	ESYT2	0.041625
FP025298	40	380.564	109.88	3.4634	0.00146	**	0.623678	SLITRK4_1	SLITRK4	0.0417281
FP005682	14	156.306	37.1225	4.2106	0.001459	**	0.785563	XXYLT1_1	XXYLT1	0.0417281
FP020600	16	1299.94	323.642	4.0166	0.001466	**	0.744158	SEPT9_10	42987	0.0418023
FP019236	15	2230.93	543.751	4.1028	0.001465	**	0.764079	VPS9D1_2	VPS9D1	0.0418023
FP016575	26	430.263	118.445	3.6326	0.001471	**	0.711765	ZIC5_1	ZIC5	0.0418962
FP009045	17	-849.646	211.74	-4.0127	0.0014764	**	-0.743834	SF3B5_1	SF3B5	0.0419011
FP016861	16	139.269	34.711	4.0122	0.001478	**	0.743797	FAM177A1_1	FAM177A1	0.0419011
FP018261	16	160.23	39.9352	4.0122	0.001478	**	0.743798	GNG13_1	GNG13	0.0419011
FP014214	16	129.494	31.5985	4.0981	0.001477	**	0.76371	KLC2_2	KLC2	0.0419011
FP012912	31	115.753	32.7291	3.5367	0.001486	**	0.678329	PTEN_1	PTEN	0.0419342
FP013846	17	89.3944	22.6965	3.9387	0.001484	**	0.725008	KAI1_1	KAI1	0.0419342
FP004342	15	509.111	124.332	4.0948	0.001486	**	0.763452	TAMM41_1	TAMM41	0.0419342
FP023057	15	137.167	33.495	4.0952	0.001485	**	0.763483	GZF1_1	GZF1	0.0419342
FP012412	17	275.495	69.9964	3.9358	0.001493	**	0.72476	MCM10_1	MCM10	0.0420834
FP007439	20	165.776	43.8759	3.7783	0.0015	**	0.675607	EIF4EBP3_1	EIF4EBP3	0.0422322
FP006208	17	-273.175	69.4936	-3.9309	0.001507	**	-0.724331	PRKG2_3	PRKG2	0.0423119
FP017802	14	133.58	32.679	4.0876	0.001505	**	0.762896	TPM1_2	TPM1	0.0423119
FP022641	12	260.709	60.3185	4.3222	0.001508	**	0.807059	ZNF331_3	ZNF331	0.0423119
FP020958	15	151.457	37.0795	4.0847	0.001513	**	0.762664	PSTPIP2_1	PSTPIP2	0.0424037
FP020395	18	-3292.77	851.245	-3.8682	0.0015166	**	-0.706668	CSH2_1	CSH2	0.0424562
FP019264	13	-327.287	75.8277	-4.3162	0.0015222	**	-0.806667	VPS53_1	VPS53	0.0425644
FP004255	12	150.417	34.8803	4.3124	0.001531	**	0.84974	THAP4_1	THAP4	0.0427618
FP014729	36	129.712	37.4497	3.4636	0.001536	**	0.538026	ABCG4_2	ABCG4	0.0427698
FP024699	19	2331.57	611.952	3.8101	0.00154	**	0.689706	PQBP1_2	PQBP1	0.0427698
FP007120	19	1217.29	319.361	3.8117	0.001535	**	0.689858	TMEM167A_1	TMEM167A	0.0427698
FP019371	19	271.085	70.2119	3.861	0.001539	**	0.706006	GP1BA_1	GP1BA	0.0427698
FP013555	16	150.869	37.8075	3.9904	0.00154	**	0.741985	ILK_2	ILK	0.0427698
FP021324	12	163.412	36.5118	4.4756	0.001542	**	0.830654	MPND_1	MPND	0.042777
FP021019	59	214.112	64.1439	3.338	0.001549	**	0.309618	TCF4_11	TCF4	0.0428743
FP015757	17	150.004	38.2931	3.9173	0.001548	**	0.72313	CSRP2_1	CSRP2	0.0428743
FP002038	16	-441.938	110.886	-3.9855	0.0015539	**	-0.741571	KIAA0040_1	KIAA0040	0.0428886
FP005027	24	236.444	65.0797	3.6331	0.001556	**	0.611144	DZIP3_1	DZIP3	0.0428886
FP014889	19	65.5178	16.9948	3.8552	0.001557	**	0.705476	CACNA1C_1	CACNA1C	0.0428886
FP000277	18	5488.81	1423.68	3.8554	0.001557	**	0.705493	SZRD1_1	SZRD1	0.0428886
FP014938	16	289.423	72.6568	3.9834	0.00156	**	0.741398	VAMP1_1	VAMP1	0.0428886
FP005220	17	552.522	141.187	3.9134	0.00156	**	0.806674	ACAD9_1	ACAD9	0.0428886
FP020743	9	152.489	27.9015	5.4653	0.001565	**	0.866916	COLEC12_1	COLEC12	0.042978
FP009323	17	239.9	60.2652	3.9807	0.001568	**	0.741171	SCIN_2	SCIN	0.0430123
FP018341	16	376.996	94.725	3.9799	0.00157	**	0.741103	RNPS1_1	RNPS1	0.0430191
FP015261	20	139.672	36.2755	3.8503	0.001573	**	0.718579	PRICKLE1_2	PRICKLE1	0.0430326
FP010232	20	225.578	60.0585	3.756	0.001574	**	0.803856	MRPS33_1	MRPS33	0.0430326
FP024688	27	280.05	78.238	3.5795	0.001588	**	0.445011	WDR13_2	WDR13	0.0431815
FP017817	31	335.959	95.293	3.5255	0.00159	**	0.703836	KIAA0101_1	KIAA0101	0.0431815
FP022799	18	150.488	39.1238	3.8464	0.001585	**	0.704673	ZNF550_1	ZNF550	0.0431815
FP004420	18	830.927	212.77	3.9053	0.001585	**	0.722072	UBE2E1_2	UBE2E1	0.0431815
FP013303	17	259.778	66.5027	3.9063	0.001582	**	0.72216	CTBP2_4	CTBP2	0.0431815
FP015370	16	280.323	69.0934	4.0572	0.00159	**	0.760502	FAM186A_1	FAM186A	0.0431815
FP008983	21	46313.8	12474.7	3.7126	0.001593	**	0.658536	ALDH8A1_1	ALDH8A1	0.0431946
FP013280	12	733.516	164.729	4.4529	0.001594	**	0.829339	HTRA1_1	HTRA1	0.0431946
FP005626	20	-11339	3025.12	-3.7483	0.001601	**	-0.672674	FETUB_3	FETUB	0.0433158
FP006447	17	331.803	83.5923	3.9693	0.001602	**	0.74021	KIAA1109_1	KIAA1109	0.0433158
FP021657	20	711.086	187.602	3.7904	0.001605	**	0.687832	PKN1_1	PKN1	0.0433285
FP007895	15	4969.24	1252.28	3.9682	0.001606	**	0.740114	GMDS_2	GMDS	0.0433285
FP015669	19	5364.8	1415.68	3.7895	0.001608	**	0.742962	MON2_3	MON2	0.0433348
FP024559	104	596.321	183.607	3.2478	0.001618	**	0.230203	PHEX_1	PHEX	0.0435565
FP012405	16	257.172	64.9003	3.9626	0.001623	**	0.739642	DHTKD1_1	DHTKD1	0.0435955
FP018456	14	211.466	50.9817	4.1479	0.001622	**	0.781023	CARHSP1_1	CARHSP1	0.0435955
FP003945	16	722.098	182.315	3.9607	0.001628	**	0.739486	PLEKHM3_1	PLEKHM3	0.0436135
FP011929	14	330.377	79.6824	4.1462	0.001627	**	0.780898	AKNA_4	AKNA	0.0436135
FP010881	6	14161.5	1869.8	7.5738	0.001629	**	0.918758	RP11-758M4.1_1	RP11-758M4.1	0.0436135
FP012906	21	6999.13	1891.22	3.7008	0.001636	**	0.657351	MINPP1_2	MINPP1	0.0437532
FP001469	26	6791.75	1904.89	3.5654	0.001643	**	0.59937	BCL9_2	BCL9	0.0438926
FP014360	15	117.102	29.0042	4.0374	0.001647	**	0.758934	P2RY6_1	P2RY6	0.0439516
FP001289	16	326.086	82.4991	3.9526	0.001653	**	0.738798	GSTM5_1	GSTM5	0.0440161
FP015383	15	268.389	64.875	4.137	0.001652	**	0.780224	CSRNP2_1	CSRNP2	0.0440161
FP021473	15	-920.581	228.24	-4.0334	0.001659	**	-0.758615	ZNF561_1	ZNF561	0.0440301
FP012419	20	-1738.44	465.896	-3.7314	0.0016607	**	-0.671009	BEND7_1	BEND7	0.0440301
FP011119	18	132.797	34.7278	3.824	0.00166	**	0.636583	ZHX1-C8ORF76_1	ZHX1-C8ORF76	0.0440301
FP005100	15	126.194	31.2782	4.0346	0.001656	**	0.758707	B4GALT4_1	B4GALT4	0.0440301
FP020914	85	-8318.2	2550.18	-3.2618	0.0016673	**	-0.0792617	DTNA_3	DTNA	0.0441098
FP010562	16	258.172	65.3848	3.9485	0.001666	**	0.738449	PDLIM2_1	PDLIM2	0.0441098
FP024733	18	406.423	106.368	3.8209	0.00167	**	0.702304	GAGE12H_1	GAGE12H	0.0441337
FP004355	18	183.045	47.2102	3.8772	0.001675	**	0.719576	CAND2_1	CAND2	0.0442182
FP019195	7	300.69	40.0163	7.5142	0.001679	**	0.966356	BANP_1	BANP	0.0442762
FP000609	18	167.764	43.2872	3.8756	0.001681	**	0.71943	PHC2_1	PHC2	0.0442814
FP015677	31	257.125	73.778	3.4851	0.001697	**	0.528833	SRGAP1_1	SRGAP1	0.044538
FP022785	19	2789.82	741.243	3.7637	0.001698	**	0.685268	ZNF460_1	ZNF460	0.044538
FP018361	19	234.931	62.411	3.7643	0.001696	**	0.685322	PRSS22_1	PRSS22	0.044538
FP010923	12	266.96	60.5416	4.4095	0.001697	**	0.826794	CA13_1	CA13	0.044538
FP007286	35	174.397	50.4409	3.4575	0.001704	**	0.63494	MEGF10_1	MEGF10	0.0445788
FP025430	20	233.687	62.8176	3.7201	0.001702	**	0.660808	IKBKG_3	IKBKG	0.0445788
FP010901	19	149.349	39.7027	3.7617	0.001705	**	0.685074	TPD52_1	TPD52	0.0445788
FP002712	10	21778.5	4425.71	4.9209	0.001712	**	0.880767	PUM2_2	PUM2	0.0447142
FP006320	17	3580.45	940.47	3.8071	0.001718	**	0.597062	ADH1C_1	ADH1C	0.0448232
FP013577	18	153.245	39.6772	3.8623	0.001725	**	0.718234	NLRP10_1	NLRP10	0.044958
FP001904	15	-1107.69	276.253	-4.0097	0.0017313	**	-0.756711	FCGR3A_1	FCGR3A	0.0450709
FP006773	20	222.957	60.0697	3.7116	0.001733	**	0.669049	CCT5_2	CCT5	0.0450709
FP019118	18	391.899	103.075	3.8021	0.001736	**	0.700544	TMEM231_1	TMEM231	0.0451011
FP000770	20	141.479	38.1386	3.7096	0.001741	**	0.668846	CDC20_1	CDC20	0.0451355
FP008184	14	360.192	87.7109	4.1066	0.00174	**	0.777963	DDR1_2	DDR1	0.0451355
FP025080	63	116.553	35.513	3.282	0.001749	**	0.683576	CHRDL1_2	CHRDL1	0.045295
FP010193	32	418.072	120.888	3.4584	0.001756	**	0.527848	PTN_1	PTN	0.0454284
FP003147	21	126.998	34.6314	3.6671	0.001763	**	0.65393	LBX2_1	LBX2	0.0454953
FP015694	17	354.704	90.5411	3.9176	0.001766	**	0.735804	IRAK3_1	IRAK3	0.0454953
FP016438	16	3239.1	826.721	3.918	0.001765	**	0.73584	LPAR6_1	LPAR6	0.0454953
FP016012	16	2641.96	674.201	3.9187	0.001763	**	0.735895	NAA25_1	NAA25	0.0454953
FP003970	18	-5053.72	1313.41	-3.8478	0.0017753	**	-0.716924	CPS1_2	CPS1	0.0455801
FP014646	51	106.171	31.9188	3.3263	0.001783	**	0.63532	ZBTB16_2	ZBTB16	0.0455801
FP021487	20	154.238	41.7024	3.6985	0.001783	**	0.667743	P2RY11_1	P2RY11	0.0455801
FP003389	18	196.224	51.7943	3.7885	0.001785	**	0.699271	ANAPC1_1	ANAPC1	0.0455801
FP019786	18	1195.53	310.909	3.8453	0.001784	**	0.716698	RFFL_5	RFFL	0.0455801
FP009108	17	338.955	88.1232	3.8464	0.00178	**	0.716798	SYNE1_2	SYNE1	0.0455801
FP019674	16	1692.63	432.694	3.9118	0.001786	**	0.735308	KCNJ12_2	KCNJ12	0.0455801
FP015596	16	274.504	68.7343	3.9937	0.001782	**	0.755418	NACA_2	NACA	0.0455801
FP013216	26	401.094	112.174	3.5757	0.001783	**	0.792811	ABLIM1_3	ABLIM1	0.0455801
FP017669	21	385.463	104.254	3.6973	0.001788	**	0.667622	SHF_1	SHF	0.0455838
FP007238	32	154.218	44.6968	3.4503	0.001793	**	0.699728	AP3S1_1	AP3S1	0.045642
FP004881	15	1426.45	357.529	3.9898	0.001794	**	0.755098	SYNPR_1	SYNPR	0.045642
FP015109	21	337.511	91.3402	3.6951	0.001797	**	0.667397	H2AFJ_1	H2AFJ	0.045671
FP001626	18	3376.81	892.488	3.7836	0.001803	**	0.698803	S100A9_1	S100A9	0.0457761
FP013378	11	204.554	44.6934	4.5768	0.00181	**	0.789341	RIC_1	RIC	0.0459063
FP008104	17	522.906	136.276	3.8371	0.001813	**	0.715955	HIST1H4K_1	HIST1H4K	0.0459349
FP009673	14	170.577	41.804	4.0804	0.001819	**	0.775993	GTF2IRD2_1	GTF2IRD2	0.0459447
FP009676	14	170.577	41.804	4.0804	0.001819	**	0.775993	GTF2IRD2B_1	GTF2IRD2B	0.0459447
FP015475	11	771.5	168.693	4.5734	0.001818	**	0.850492	PCBP2_1	PCBP2	0.0459447
FP016305	17	6178.31	1584.37	3.8995	0.001828	**	0.734243	FLT1_2	FLT1	0.0459828
FP004352	17	377.797	96.8602	3.9004	0.001825	**	0.73432	RAF1_1	RAF1	0.0459828
FP004204	15	273.373	68.6978	3.9793	0.001828	**	0.759818	ESPNL_3	ESPNL	0.0459828
FP023010	14	376.872	89.7064	4.2012	0.001825	**	0.798959	BFSP1_3	BFSP1	0.0459828
FP014525	26	349.99	98.8221	3.5416	0.001832	**	0.678948	FAM76B_1	FAM76B	0.0460363
FP016350	15	1115.63	286.461	3.8945	0.001845	**	0.733809	SPG20_2	SPG20	0.0463155
FP020411	17	79.0041	20.6459	3.8266	0.001851	**	0.715001	DDX5_1	DDX5	0.0464187
FP020544	26	601.402	170.041	3.5368	0.001853	**	0.701021	RECQL5_1	RECQL5	0.0464214
FP003865	21	141.345	38.4262	3.6784	0.001863	**	0.454784	BZW1_2	BZW1	0.0464928
FP023340	19	786.162	211.275	3.721	0.001858	**	0.511435	ZNF334_1	ZNF334	0.0464928
FP013752	24	989.959	278.377	3.5562	0.001867	**	0.665584	METTL15_1	METTL15	0.0464928
FP016489	19	271.613	73.0318	3.7191	0.001866	**	0.680925	PCDH20_1	PCDH20	0.0464928
FP015899	18	216.475	56.6503	3.8212	0.001871	**	0.714508	GLT8D2_1	GLT8D2	0.0464928
FP011466	17	3672.93	961.145	3.8214	0.00187	**	0.714524	UBAP2_3	UBAP2	0.0464928
FP019819	14	2267.74	571.731	3.9665	0.001871	**	0.753193	CCL14_1	CCL14	0.0464928
FP005769	9	178.074	33.7114	5.2823	0.001861	**	0.907207	TMEM129_1	TMEM129	0.0464928
FP020243	19	-692.975	186.471	-3.7163	0.0018768	**	-0.680647	SAMD14_2	SAMD14	0.0465898
FP003446	23	184.914	50.82	3.6386	0.001879	**	0.681826	CLASP1_1	CLASP1	0.0465973
FP014936	21	201.549	55.4409	3.6354	0.001892	**	0.650671	LTBR_2	LTBR	0.0468251
FP022346	15	2138.24	539.924	3.9603	0.001892	**	0.752683	IGFL2_1	IGFL2	0.0468251
FP006444	16	294.998	76.0478	3.8791	0.0019	**	0.732462	BBS7_1	BBS7	0.0468342
FP002871	16	182.025	46.9156	3.8799	0.001897	**	0.732527	AC007390.5_1	AC007390.5	0.0468342
FP021536	12	359.072	79.0959	4.5397	0.0019	**	0.848744	KANK2_2	KANK2	0.0468342
FP010857	11	219.276	45.3942	4.8305	0.001898	**	0.877059	TRAM1_1	TRAM1	0.0468342
FP005791	20	5364.18	1462.55	3.6677	0.001907	**	0.00125427	FAM193A_2	FAM193A	0.0468478
FP013194	46	188.955	56.8641	3.3229	0.001912	**	0.543232	TCF7L2_6	TCF7L2	0.0468478
FP023008	27	2414.97	689.251	3.5038	0.00191	**	0.651849	OTOR_1	OTOR	0.0468478
FP014919	17	6638.44	1767.65	3.7555	0.001909	**	0.696137	NDUFA9_1	NDUFA9	0.0468478
FP005264	14	424.592	104.811	4.051	0.001912	**	0.773758	ACPP_1	ACPP	0.0468478
FP009275	12	6838.76	1506.85	4.5384	0.001903	**	0.848679	RBAK_2	RBAK	0.0468478
FP013299	17	118.164	31.0627	3.8041	0.001935	**	0.71293	FAM53B_1	FAM53B	0.0473641
FP008931	17	84.2477	22.1557	3.8025	0.001941	**	0.71279	ECHDC1_1	ECHDC1	0.0474636
FP016523	17	-5908.48	1554.33	-3.8013	0.001946	**	-0.640272	EDNRB_1	EDNRB	0.0475386
FP006375	16	-7717.57	1997.6	-3.8634	0.0019571	**	-0.731085	HADH_1	HADH	0.0475979
FP013576	22	3536.8	977.175	3.6194	0.001961	**	0.649018	OR10A6_1	OR10A6	0.0475979
FP016896	21	263.48	72.7555	3.6214	0.001952	**	0.649229	KLHL28_2	KLHL28	0.0475979
FP005540	20	17340	4742.03	3.6567	0.001953	**	0.663521	MFN1_3	MFN1	0.0475979
FP012562	16	1792.77	471.97	3.7985	0.001957	**	0.712415	CCNY_1	CCNY	0.0475979
FP015377	15	287.503	72.9635	3.9404	0.001962	**	0.751038	METTL7A_1	METTL7A	0.0475979
FP020635	12	172.212	39.9467	4.3111	0.001959	**	0.820816	ENGASE_1	ENGASE	0.0475979
FP010574	16	128.975	33.4062	3.8608	0.001967	**	0.730854	TNFRSF10B_1	TNFRSF10B	0.0476721
FP019169	6	241.361	33.5229	7.1999	0.001972	**	0.955144	ZDHHC7_1	ZDHHC7	0.0477461
FP023499	17	2487.49	655.82	3.7929	0.001978	**	0.711904	COL20A1_1	COL20A1	0.0477971
FP002695	16	332.266	86.127	3.8578	0.001978	**	0.730592	GEN1_1	GEN1	0.0477971
FP000278	18	452.734	121.237	3.7343	0.001994	**	0.642089	SPATA21_1	SPATA21	0.047997
FP018863	21	8472.22	2346.08	3.6112	0.001997	**	0.648168	NLRC5_2	NLRC5	0.047997
FP015237	16	123.614	32.6214	3.7894	0.001992	**	0.711572	PKP2_1	PKP2	0.047997
FP025121	16	8359.12	2169.31	3.8534	0.001995	**	0.730197	CXorf56_1	CXorf56	0.047997
FP022141	17	223.724	58.0504	3.854	0.001993	**	0.73025	SHKBP1_1	SHKBP1	0.047997
FP018331	13	196.796	48.8913	4.0252	0.001998	**	0.771763	MLST8_1	MLST8	0.047997
FP022883	17	941.276	244.376	3.8518	0.002001	**	0.730054	SDCBP2_1	SDCBP2	0.0479991
FP014225	12	359.228	83.617	4.2961	0.002002	**	0.819886	SLC29A2_1	SLC29A2	0.0479991
FP003212	16	-13773.6	3576.87	-3.8507	0.002005	**	-0.729966	ST3GAL5_2	ST3GAL5	0.0480242
FP004520	43	212.77	63.8757	3.331	0.002009	**	0.314128	CSRNP1_1	CSRNP1	0.0480731
FP012516	22	159.922	44.7391	3.5745	0.002022	**	0.475499	MPP7_1	MPP7	0.04829
FP017229	18	280.244	74.1009	3.7819	0.002022	**	0.710882	GALC_1	GALC	0.04829
FP013762	22	598.68	167.5	3.5742	0.002024	**	0.634071	ELP4_1	ELP4	0.0482908
FP018412	16	196.609	51.141	3.8445	0.002029	**	0.729408	DNAJA3_1	DNAJA3	0.0483631
FP007877	18	1204.24	323.501	3.7225	0.002043	**	0.692963	BTNL8_1	BTNL8	0.0484859
FP024732	18	393.414	105.671	3.723	0.002041	**	0.693012	GAGE12F_1	GAGE12F	0.0484859
FP012559	16	1023.79	261.364	3.9171	0.002046	**	0.749093	CREM_5	CREM	0.0484859
FP003605	15	78.215	19.9581	3.919	0.002039	**	0.74925	CD302_1	CD302	0.0484859
FP016228	12	620.567	144.869	4.2836	0.002039	**	0.819101	TUBA3C_1	TUBA3C	0.0484859
FP016580	9	161.089	31.0719	5.1844	0.002046	**	0.904161	TMTC4_1	TMTC4	0.0484859
FP009544	16	252.215	65.7037	3.8387	0.002051	**	0.728893	TMED4_1	TMED4	0.0485575
FP012156	13	139.402	33.7782	4.127	0.002054	**	0.793767	LAMC3_1	LAMC3	0.0485817
FP025390	15	204.14	52.1708	3.9129	0.002061	**	0.428647	L1CAM_2	L1CAM	0.0487003
FP018917	20	264.924	72.9542	3.6314	0.002063	**	0.660941	CDH5_2	CDH5	0.0487007
FP017121	45	254.869	77.2105	3.301	0.002067	**	0.544727	ZFYVE1_1	ZFYVE1	0.0487015
FP001296	22	6488.15	1819.87	3.5652	0.002066	**	0.714765	AHCYL1_3	AHCYL1	0.0487015
FP006573	20	287.775	79.2738	3.6301	0.002069	**	0.660814	PLRG1_1	PLRG1	0.0487018
FP017925	19	11824.5	3183.36	3.7145	0.002077	**	0.643495	TMEM202_1	TMEM202	0.0487499
FP022130	17	1852.32	483.37	3.8321	0.002077	**	0.728308	PLD3_1	PLD3	0.0487499
FP009051	15	307.495	78.6579	3.9093	0.002075	**	0.748435	EPM2A_1	EPM2A	0.0487499
FP007164	22	117.156	32.6075	3.5929	0.00208	**	0.646254	CAST_1	CAST	0.0487737
FP025070	22	187.382	52.1937	3.5901	0.002093	**	0.645964	NXT2_2	NXT2	0.048985
FP009092	14	562.107	140.585	3.9983	0.002092	**	0.769671	MTHFD1L_1	MTHFD1L	0.048985
FP007894	19	81.1315	22.148	3.6632	0.0021	**	0.675373	FOXC1_1	FOXC1	0.049102
FP011457	16	121.748	31.2003	3.9021	0.002102	**	0.747834	NFX1_1	NFX1	0.049102
FP004595	20	251.048	68.5545	3.662	0.002105	**	0.675259	SLC6A20_1	SLC6A20	0.0491253
FP021800	25	198.699	56.6912	3.5049	0.002108	**	0.607517	CRTC1_2	CRTC1	0.0491486
FP024091	21	2047.1	570.847	3.5861	0.002112	**	0.645539	LARGE_3	LARGE	0.0491952
FP001861	20	2496.95	689.92	3.6192	0.002119	**	0.327407	DCAF8_1	DCAF8	0.049218
FP000878	54	371.582	114.384	3.2485	0.002121	**	0.568351	ELAVL4_3	ELAVL4	0.049218
FP023840	20	156.159	42.675	3.6593	0.002117	**	0.674983	BCL2L13_2	BCL2L13	0.049218
FP006647	16	276.196	70.8667	3.8974	0.00212	**	0.747433	HMGB2_2	HMGB2	0.049218
FP020132	59	167.505	51.8548	3.2303	0.002127	**	0.527912	NMT1_1	NMT1	0.0492641
FP022686	18	341.288	92.166	3.703	0.002126	**	0.691065	KIR3DX1_1	KIR3DX1	0.0492641
FP020397	17	-2756.52	733.99	-3.7555	0.00213	**	-0.708415	CSH1_1	CSH1	0.0492871
FP001451	20	-198.233	54.2377	-3.6549	0.0021365	**	-0.674543	PIAS3_1	PIAS3	0.0492981
FP019803	17	11306.7	3011.32	3.7547	0.002133	**	0.708338	SLFN12L_1	SLFN12L	0.0492981
FP005289	13	504.68	126.603	3.9863	0.002136	**	0.723513	CEP63_2	CEP63	0.0492981
FP019659	16	816.027	209.64	3.8925	0.002139	**	0.74702	AKAP10_1	AKAP10	0.0493095
FP002535	22	1504.77	420.624	3.5775	0.002152	**	0.644634	HEATR1_2	HEATR1	0.0495626
FP000832	17	194.631	51.9147	3.749	0.002157	**	0.707804	IPP_1	IPP	0.0496297
FP007846	15	697.207	179.403	3.8863	0.002163	**	0.746488	CANX_1	CANX	0.0496297
FP019048	15	109.714	27.5657	3.9801	0.002159	**	0.768231	EXOSC6_1	EXOSC6	0.0496297
FP005881	15	75.9738	18.5533	4.0949	0.002162	**	0.791469	CPEB2_1	CPEB2	0.0496297
FP011540	16	67.0695	17.6034	3.81	0.002166	**	0.72633	MELK_1	MELK	0.0496522
FP012866	20	1082.43	300.02	3.6079	0.002172	**	0.65852	ANXA11_2	ANXA11	0.0497433
FP022146	33	81.5478	24.0907	3.385	0.002192	**	0.326111	NUMBL_1	NUMBL	0.0499219
FP001573	19	117.334	32.2056	3.6433	0.00219	**	0.481505	MRPL9_1	MRPL9	0.0499219
FP015061	21	16939.7	4783.71	3.5411	0.002182	**	0.63054	TAS2R9_1	TAS2R9	0.0499219
FP022090	19	443.248	121.668	3.6431	0.00219	**	0.673356	PAPL_1	PAPL	0.0499219
FP005935	18	129.788	34.6933	3.741	0.002192	**	0.707045	SMIM20_1	SMIM20	0.0499219
FP004805	16	629.853	165.555	3.8045	0.002189	**	0.72583	NEK4_1	NEK4	0.0499219
FP016162	20	171.258	47.5328	3.6029	0.002195	**	0.658012	RILPL2_1	RILPL2	0.0499439

## Sheet: Mammals positive corr
epdid	speciescount	estimate	stderr	t.value	p.value	stars	pearsoncorrelation	geneid	geneidnameonly	adjust
FP012506	20	302.894	32.3944	9.3502	4.107e-08	***	0.865057	ACBD5_2	ACBD5	0.000504155
FP008738	22	391.221	43.6368	8.9654	2.965e-08	***	0.899339	ORC3_1	ORC3	0.000504155
FP015579	28	1449.31	192.948	7.5114	1.243e-07	***	0.842854	PAN2_3	PAN2	0.000508615
FP014005	25	220.551	27.8209	7.9275	9.526e-08	***	0.865759	DDB1_1	DDB1	0.000508615
FP018129	22	287.487	33.9629	8.4648	1.087e-07	***	0.893993	WDR93_1	WDR93	0.000508615
FP007328	15	10588.3	957.978	11.053	1.202e-07	***	0.954231	SEPT8_1	42986	0.000508615
FP005002	28	3452.45	489.571	7.052	2.162e-07	***	0.81576	IMPG2_1	IMPG2	0.000758275
FP008611	26	292.774	42.8446	6.8334	5.73e-07	***	0.81853	GCLC_1	GCLC	0.00175847
FP014573	24	398.648	56.2252	7.0902	7.14e-07	***	0.845806	AASDHPPT_1	AASDHPPT	0.00194771
FP018860	18	190.272	24.6591	7.7161	1.34e-06	***	0.893735	HERPUD1_1	HERPUD1	0.00328983
FP001958	24	202.391	30.5737	6.6198	2.469e-06	***	0.835199	MPC2_2	MPC2	0.0046798
FP015981	22	300.289	44.434	6.7581	2.478e-06	***	0.846935	ANAPC7_1	ANAPC7	0.0046798
FP021742	16	450.387	56.6093	7.9561	2.375e-06	***	0.874379	MVB12A_1	MVB12A	0.0046798
FP003030	22	194.707	29.7591	6.5428	2.891e-06	***	0.832224	UGP2_2	UGP2	0.0047318
FP009339	14	1993.11	242.836	8.2076	2.89e-06	***	0.921303	LRRC72_1	LRRC72	0.0047318
FP000941	21	331.154	50.3789	6.5733	3.56e-06	***	0.84019	FAM151A_1	FAM151A	0.00494157
FP024056	20	178.363	25.8792	6.8921	3.623e-06	***	0.864892	RNF185_1	RNF185	0.00494157
FP017717	19	3689.62	532.867	6.9241	3.424e-06	***	0.865897	GLDN_2	GLDN	0.00494157
FP015008	15	274.085	32.7431	8.3708	4.235e-06	***	0.929685	CLEC4C_1	CLEC4C	0.00547229
FP004992	19	212.698	32.2608	6.5931	6.185e-06	***	0.717329	TMEM45A_1	TMEM45A	0.00677608
FP008178	27	96.2235	16.5875	5.801	5.569e-06	***	0.764005	MDC1_1	MDC1	0.00677608
FP016589	21	304.49	48.3746	6.2944	6.202e-06	***	0.829221	KDELC1_1	KDELC1	0.00677608
FP009725	14	118.953	14.8244	8.0242	6.348e-06	***	0.924168	SEMA3C_2	SEMA3C	0.00677608
FP023641	26	1165.3	201.962	5.7699	7.061e-06	***	0.769034	DONSON_2	DONSON	0.00721098
FP025429	20	241.945	38.4086	6.2992	8e-06	***	0.836703	G6PD_1	G6PD	0.00721098
FP002134	20	524.162	83.1498	6.3038	7.929e-06	***	0.836886	UCHL5_1	UCHL5	0.00721098
FP010368	15	143.332	19.357	7.4046	8.224e-06	***	0.905778	DPP6_1	DPP6	0.00721098
FP018038	15	14194.5	1897.85	7.4793	7.438e-06	***	0.907398	C15orf37_1	C15orf37	0.00721098
FP008963	18	5514.13	845.406	6.5225	9.647e-06	***	0.859839	TAAR6_1	TAAR6	0.00787166
FP004075	20	193.963	31.4319	6.1709	1.026e-05	***	0.883735	KCNE4_1	KCNE4	0.00787166
FP022565	14	1803.03	234.05	7.7037	9.335e-06	***	0.891699	KLK14_1	KLK14	0.00787166
FP009597	13	4000.35	524.379	7.6287	1.023e-05	***	0.91708	VOPP1_3	VOPP1	0.00787166
FP013100	25	194.964	34.2649	5.6899	1.199e-05	***	0.778818	NOLC1_2	NOLC1	0.00865784
FP024606	16	1981.93	289.717	6.8409	1.187e-05	***	0.808128	PRRG1_1	PRRG1	0.00865784
FP025218	25	190.362	34.2092	5.5646	1.358e-05	***	0.764614	GPC4_1	GPC4	0.00952579
FP020256	21	564.737	94.1891	5.9958	1.446e-05	***	0.823977	EPN3_2	EPN3	0.00986132
FP008140	23	139.02	24.6171	5.6473	1.582e-05	***	0.783954	GABBR1_1	GABBR1	0.0100093
FP008971	20	491.896	80.5244	6.1087	1.51e-05	***	0.813609	RPS12_1	RPS12	0.0100093
FP008845	16	177.427	26.6834	6.6494	1.59e-05	***	0.897073	GTF3C6_1	GTF3C6	0.0100093
FP014453	22	550.745	94.7518	5.8125	1.658e-05	***	0.865259	PCF11_1	PCF11	0.0101764
FP009935	16	1020.09	156.594	6.5142	1.96e-05	***	0.601695	CLDN15_2	CLDN15	0.0109145
FP020121	16	165.478	25.4424	6.504	1.991e-05	***	0.777392	HIGD1B_2	HIGD1B	0.0109145
FP017287	22	192.371	33.4834	5.7453	1.907e-05	***	0.804435	BTBD7_1	BTBD7	0.0109145
FP013691	11	108.788	13.4642	8.0797	2.045e-05	***	0.849773	RP11-113D6.10_1	RP11-113D6.10	0.0109145
FP022857	16	204.988	30.1498	6.799	1.906e-05	***	0.891015	ZCCHC3_1	ZCCHC3	0.0109145
FP019694	20	5979.93	1029.58	5.8081	2.098e-05	***	0.815428	SLC13A2_1	SLC13A2	0.0109591
FP002260	22	251.338	44.2773	5.6765	2.201e-05	***	0.800995	CDK18_1	CDK18	0.0112577
FP008541	30	4653.63	907.259	5.1293	2.39e-05	***	0.605297	HSP90AB1_2	HSP90AB1	0.0115053
FP001788	22	273.699	49.3022	5.5515	2.355e-05	***	0.786522	CRABP2_1	CRABP2	0.0115053
FP011390	16	18271.7	2749.07	6.6465	2.372e-05	***	0.886784	HAUS6_3	HAUS6	0.0115053
FP001728	24	240.1	44.7176	5.3692	2.52e-05	***	0.76063	RUSC1_1	RUSC1	0.0116733
FP025091	6	15432.1	699.24	22.07	2.495e-05	***	0.995919	AMOT_4	AMOT	0.0116733
FP020326	20	238.64	41.9593	5.6874	2.672e-05	***	0.809629	RAD51C_1	RAD51C	0.0121482
FP006424	18	490.847	80.9101	6.0666	2.904e-05	***	0.791093	SYNPO2_2	SYNPO2	0.0129629
FP012073	23	173.807	33.8884	5.1288	5.968e-05	***	0.552936	SLC25A25_1	SLC25A25	0.0137059
FP006531	34	482.278	100.168	4.8147	4.245e-05	***	0.574959	C4orf51_1	C4orf51	0.0137059
FP005017	63	432.626	99.1601	4.3629	5.694e-05	***	0.642104	CBLB_1	CBLB	0.0137059
FP024093	65	278.853	64.3739	4.3318	6.064e-05	***	0.652554	LARGE_1	LARGE	0.0137059
FP001228	32	154.427	32.6105	4.7355	6.2e-05	***	0.673586	SLC30A7_1	SLC30A7	0.0137059
FP010528	17	456.002	81.2119	5.615	6.375e-05	***	0.686757	CSGALNACT1_2	CSGALNACT1	0.0137059
FP003642	28	250.099	50.7577	4.9273	4.499e-05	***	0.701911	STK39_1	STK39	0.0137059
FP024299	17	449.239	78.2584	5.7405	5.109e-05	***	0.703551	PARVB_4	PARVB	0.0137059
FP018007	30	473.282	96.181	4.9207	5.082e-05	***	0.706867	TSPAN3_1	TSPAN3	0.0137059
FP007797	37	99.9037	21.0121	4.7546	3.795e-05	***	0.71682	NSD1_2	NSD1	0.0137059
FP010081	27	12303.3	2407.1	5.1113	3.136e-05	***	0.72194	RNF133_1	RNF133	0.0137059
FP023130	17	474.583	82.8073	5.7312	5.193e-05	***	0.722312	BPIFA3_1	BPIFA3	0.0137059
FP014590	18	793.145	134.133	5.9131	3.781e-05	***	0.736748	EXPH5_2	EXPH5	0.0137059
FP002079	18	476.786	81.233	5.8694	4.079e-05	***	0.740872	MR1_1	MR1	0.0137059
FP011997	25	295.135	56.9113	5.1859	3.869e-05	***	0.74935	RABGAP1_2	RABGAP1	0.0137059
FP017886	24	180.694	34.6189	5.2195	3.576e-05	***	0.751471	FEM1B_1	FEM1B	0.0137059
FP017345	24	1200.14	227.442	5.2767	3.651e-05	***	0.762869	EML1_1	EML1	0.0137059
FP004101	22	208.142	40.406	5.1512	5.677e-05	***	0.763375	SPHKAP_1	SPHKAP	0.0137059
FP008999	21	216.516	40.872	5.2974	4.109e-05	***	0.772193	MAP7_1	MAP7	0.0137059
FP004234	22	266.081	49.6969	5.3541	3.627e-05	***	0.775496	KIF1A_2	KIF1A	0.0137059
FP018945	22	220.799	42.3077	5.2189	5.795e-05	***	0.775948	B3GNT9_1	B3GNT9	0.0137059
FP016331	21	1042.47	199.401	5.228	5.683e-05	***	0.776487	CG005_1	CG005	0.0137059
FP002659	21	377.044	72.0582	5.2325	5.629e-05	***	0.77675	HPCAL1_5	HPCAL1	0.0137059
FP007006	22	560.646	106.322	5.2731	5.16e-05	***	0.779126	CCNB1_1	CCNB1	0.0137059
FP006465	22	343.119	63.7921	5.3787	4.121e-05	***	0.785146	INTU_1	INTU	0.0137059
FP002568	23	7689.78	1514.6	5.0771	5.758e-05	***	0.788457	HNRNPU_2	HNRNPU	0.0137059
FP008502	21	228.185	43.1516	5.288	6.026e-05	***	0.788613	MRPL2_1	MRPL2	0.0137059
FP005007	16	391.638	65.0641	6.0193	4.309e-05	***	0.790277	RPL24_1	RPL24	0.0137059
FP017072	20	95.2605	17.908	5.3194	5.648e-05	***	0.790376	ARG2_1	ARG2	0.0137059
FP020740	21	197.389	36.922	5.3461	5.347e-05	***	0.791856	METRNL_2	METRNL	0.0137059
FP017286	20	2461.99	459.597	5.3569	6.42e-05	***	0.801265	BTBD7_2	BTBD7	0.0137059
FP005244	20	220.143	41.0329	5.365	6.317e-05	***	0.801702	PLXND1_2	PLXND1	0.0137059
FP006148	20	230.75	41.5352	5.5555	3.487e-05	***	0.803011	PF4V1_1	PF4V1	0.0137059
FP024852	19	340.367	63.1044	5.3937	5.97e-05	***	0.803226	RAB41_1	RAB41	0.0137059
FP008617	19	260.722	47.5457	5.4836	5.004e-05	***	0.8079	FAM83B_1	FAM83B	0.0137059
FP009717	20	78.5151	14.3053	5.4885	4.956e-05	***	0.808152	GNAI1_2	GNAI1	0.0137059
FP010120	15	571.571	94.364	6.0571	5.697e-05	***	0.810398	CCDC136_2	CCDC136	0.0137059
FP004613	19	6083.68	1074.03	5.6643	3.52e-05	***	0.816857	RTP3_1	RTP3	0.0137059
FP018380	18	1251.76	228.071	5.4885	6.239e-05	***	0.817054	ZSCAN10_1	ZSCAN10	0.0137059
FP019932	17	751.47	136.87	5.4904	6.216e-05	***	0.817151	GJD3_1	GJD3	0.0137059
FP011325	19	176.445	31.8556	5.5389	5.677e-05	***	0.819528	SPATA6L_1	SPATA6L	0.0137059
FP020214	18	4513.92	811.351	5.5635	5.422e-05	***	0.820716	SNF8_1	SNF8	0.0137059
FP016987	18	1425.88	252.285	5.6519	4.6e-05	***	0.824905	PSMA3_1	PSMA3	0.0137059
FP014069	18	212.392	37.3975	5.6793	4.372e-05	***	0.826179	TAF6L_1	TAF6L	0.0137059
FP005439	20	17187.4	3266.5	5.2617	6.361e-05	***	0.834248	KCNAB1_4	KCNAB1	0.0137059
FP014378	17	4485.11	779.26	5.7556	4.975e-05	***	0.83841	UCP3_1	UCP3	0.0137059
FP018325	17	121.982	21.0739	5.7883	4.698e-05	***	0.839817	NTHL1_1	NTHL1	0.0137059
FP011354	17	228.722	39.0089	5.8633	4.122e-05	***	0.842981	KDM4C_2	KDM4C	0.0137059
FP021002	17	196.764	33.2243	5.9223	3.722e-05	***	0.845408	MAPK4_2	MAPK4	0.0137059
FP004333	12	1563.52	222.133	7.0386	3.547e-05	***	0.849175	HRH1_2	HRH1	0.0137059
FP002131	17	1004.3	176.135	5.7019	5.468e-05	***	0.873068	RGS2_1	RGS2	0.0137059
FP017459	16	365.115	63.0688	5.7892	6.287e-05	***	0.89932	SNURF_1	SNURF	0.0137059
FP018678	12	87.4586	13.3082	6.5718	6.298e-05	***	0.901105	DOC2A_3	DOC2A	0.0137059
FP022660	15	301.827	50.4116	5.9872	6.34e-05	***	0.907287	TFPT_1	TFPT	0.0137059
FP007980	12	122.479	17.4927	7.0017	6.313e-05	***	0.91918	MCUR1_1	MCUR1	0.0137059
FP018195	11	121.778	15.262	7.9791	4.45e-05	***	0.942535	LRRK1_1	LRRK1	0.0137059
FP002705	10	10457.9	1146.02	9.1255	3.898e-05	***	0.954915	WDR35_2	WDR35	0.0137059
FP023837	6	2839.11	146.281	19.409	4.155e-05	***	0.994733	SLC25A18_1	SLC25A18	0.0137059
FP019286	22	408.391	79.3107	5.1493	6.729e-05	***	0.570417	MYO1C_1	MYO1C	0.0138775
FP022007	21	472.463	91.7376	5.1502	6.716e-05	***	0.771833	ZNF260_1	ZNF260	0.0138775
FP022771	20	255.438	48.7534	5.2394	6.661e-05	***	0.818361	ZNF583_2	ZNF583	0.0138775
FP022277	17	342.41	61.3632	5.5801	6.783e-05	***	0.830562	ZNF112_1	ZNF112	0.0138775
FP011936	16	249.585	44.6724	5.587	6.699e-05	***	0.830882	ATP6V1G1_1	ATP6V1G1	0.0138775
FP004052	23	340.991	68.3472	4.9891	7.047e-05	***	0.744633	PTPRN_1	PTPRN	0.0138919
FP011423	22	1688.85	329.38	5.1273	7.053e-05	***	0.770445	CDKN2B_1	CDKN2B	0.0138919
FP013639	15	479.661	80.9342	5.9266	6.961e-05	***	0.781961	MICAL2_1	MICAL2	0.0138919
FP008562	19	148.119	27.9059	5.3078	7.073e-05	***	0.798616	TDRD6_1	TDRD6	0.0138919
FP017708	17	113.06	20.3133	5.5658	6.956e-05	***	0.829904	USP8_1	USP8	0.0138919
FP016065	20	12158.1	2295.95	5.2955	7.248e-05	***	0.797941	CCDC64_2	CCDC64	0.0141227
FP013454	21	326.806	62.9824	5.1888	7.395e-05	***	0.782924	TNNI2_1	TNNI2	0.0142956
FP016693	48	1378.94	314.03	4.3911	7.476e-05	***	0.485921	SLC39A2_1	SLC39A2	0.0143393
FP016733	14	342.156	58.2817	5.8707	7.59e-05	***	0.861246	FLJ20424_1	FLJ20424	0.0144451
FP007855	20	5907.97	1126.3	5.2454	8.005e-05	***	0.795178	SQSTM1_4	SQSTM1	0.0151178
FP022757	16	1210.73	221.277	5.4716	8.232e-05	***	0.825451	NLRP4_1	NLRP4	0.0154278
FP013693	20	4489.65	874.831	5.132	8.321e-05	***	0.779572	SAA2_1	SAA2	0.0154764
FP023014	15	3969.29	707.124	5.6133	8.434e-05	***	0.841383	DSTN_2	DSTN	0.0155687
FP006442	18	316.868	59.5874	5.3177	8.611e-05	***	0.808334	EXOSC9_1	EXOSC9	0.0157768
FP005776	20	16361.1	3201.72	5.1101	8.709e-05	***	0.77826	WHSC1_4	WHSC1	0.0158381
FP015030	21	97.7063	19.1525	5.1015	8.866e-05	***	0.777743	M6PR_1	M6PR	0.0160051
FP004959	19	18609.8	3586.14	5.1894	8.951e-05	***	0.79202	PROS1_2	PROS1	0.0160406
FP002812	21	277.827	55.5511	5.0013	9.259e-05	***	0.762575	CCDC121_1	CCDC121	0.016237
FP006081	21	9795.58	1926.48	5.0847	9.182e-05	***	0.776728	TECRL_1	TECRL	0.016237
FP003366	17	498.062	92.1196	5.4067	9.249e-05	***	0.822295	SULT1C4_1	SULT1C4	0.016237
FP019891	24	346.879	72.146	4.808	9.443e-05	***	0.723874	PGAP3_1	PGAP3	0.0162409
FP011994	23	306.468	62.3161	4.9179	9.551e-05	***	0.76587	ZBTB26_2	ZBTB26	0.0162409
FP002840	20	3666.99	724.165	5.0637	9.592e-05	***	0.775453	CAPN13_2	CAPN13	0.0162409
FP004526	18	20304.1	3769.25	5.3868	9.587e-05	***	0.82131	CCR8_1	CCR8	0.0162409
FP014135	27	151.649	31.5735	4.8031	9.555e-05	***	0.880445	CDC42BPG_1	CDC42BPG	0.0162409
FP010203	19	1178.5	228.889	5.1488	9.706e-05	***	0.789696	TMEM213_1	TMEM213	0.0163214
FP009547	21	489.72	98.4491	4.9743	9.814e-05	***	0.703498	OGDH_3	OGDH	0.0163907
FP016956	17	188.606	34.193	5.5159	9.943e-05	***	0.837038	CDKN3_1	CDKN3	0.016494
FP017388	17	366.28	68.3162	5.3615	0.0001003	***	0.820052	TNFAIP2_1	TNFAIP2	0.0165266
FP022176	36	163.027	36.5076	4.4656	0.0001048	***	0.633662	TMEM91_2	TMEM91	0.0167234
FP010964	21	432	87.2255	4.9527	0.0001029	***	0.759448	RBM12B_1	RBM12B	0.0167234
FP000977	19	139.082	27.1855	5.1161	0.0001036	***	0.787794	C1orf87_1	C1orf87	0.0167234
FP019258	17	140.204	26.2703	5.337	0.0001049	***	0.818816	GAS8_2	GAS8	0.0167234
FP012097	14	450.375	76.4362	5.8922	0.0001043	***	0.871432	ODF2_1	ODF2	0.0167234
FP011123	18	4066.74	797.777	5.0976	0.0001075	***	0.786712	FBXO32_2	FBXO32	0.0170273
FP000189	16	440.182	80.6869	5.4554	0.0001102	***	0.787952	C1orf127_1	C1orf127	0.0173431
FP010839	22	806.693	166.422	4.8473	0.0001119	***	0.743572	COPS5_1	COPS5	0.0174654
FP004123	21	284.631	57.0656	4.9878	0.0001124	***	0.770753	ITM2C_2	ITM2C	0.0174654
FP003786	22	301.434	62.3303	4.8361	0.0001148	***	0.742804	TFPI_1	TFPI	0.0176153
FP009918	19	169.694	33.4921	5.0667	0.0001144	***	0.784884	SRRT_1	SRRT	0.0176153
FP007902	19	354.932	70.2105	5.0552	0.0001171	***	0.733102	SERPINB9_2	SERPINB9	0.0177464
FP000425	21	2772.69	566.487	4.8945	0.0001167	***	0.746418	SYF2_1	SYF2	0.0177464
FP000731	21	478.736	98.0797	4.8811	0.0001202	***	0.634963	SLFNL1_2	SLFNL1	0.0180839
FP002623	18	415.341	80.8011	5.1403	0.0001208	***	0.798673	ADI1_1	ADI1	0.0180839
FP006583	21	436.63	89.4309	4.8823	0.0001403	***	0.679887	GUCY1A3_1	GUCY1A3	0.0181807
FP004184	25	408.792	88.0859	4.6408	0.0001261	***	0.70334	ASB18_1	ASB18	0.0181807
FP022788	14	2468.73	443.976	5.5605	0.0001237	***	0.709794	ZNF304_1	ZNF304	0.0181807
FP005631	15	4698.28	849.584	5.5301	0.0001298	***	0.737305	RFC4_1	RFC4	0.0181807
FP017332	23	228.564	47.771	4.7846	0.0001289	***	0.739226	PAPOLA_1	PAPOLA	0.0181807
FP000183	21	971.829	200.754	4.8409	0.0001312	***	0.752049	DFFA_2	DFFA	0.0181807
FP024736	21	4105.9	845.429	4.8566	0.0001268	***	0.753105	PAGE4_1	PAGE4	0.0181807
FP007100	22	230.047	47.2351	4.8703	0.000123	***	0.75402	MTX3_1	MTX3	0.0181807
FP019012	21	153.209	31.3212	4.8915	0.0001376	***	0.76461	ESRP2_1	ESRP2	0.0181807
FP011533	20	362.321	73.428	4.9344	0.0001257	***	0.767369	CCIN_1	CCIN	0.0181807
FP008440	20	264.812	53.3437	4.9643	0.0001407	***	0.778676	DAAM2_2	DAAM2	0.0181807
FP012558	19	4547.65	914.908	4.9706	0.0001389	***	0.779068	CREM_4	CREM	0.0181807
FP022308	19	112.615	22.629	4.9766	0.0001372	***	0.779435	ERCC2_1	ERCC2	0.0181807
FP008166	19	123.235	24.5344	5.023	0.000125	***	0.782262	ABCF1_1	ABCF1	0.0181807
FP009009	18	203.162	40.0188	5.0767	0.0001366	***	0.795051	IFNGR1_1	IFNGR1	0.0181807
FP017660	17	275.94	53.2914	5.1779	0.0001401	***	0.810529	TRIM69_1	TRIM69	0.0181807
FP011127	17	106.525	20.5029	5.1956	0.0001357	***	0.811474	FAM91A1_1	FAM91A1	0.0181807
FP012569	18	180.888	34.8092	5.1966	0.0001354	***	0.811525	ZNF248_1	ZNF248	0.0181807
FP001745	17	747.583	143.803	5.1987	0.0001349	***	0.811637	RIT1_1	RIT1	0.0181807
FP013485	17	467.812	89.4741	5.2285	0.0001278	***	0.813215	SLC22A18_1	SLC22A18	0.0181807
FP002321	17	2970.75	566.905	5.2403	0.000125	***	0.813838	HHAT_4	HHAT	0.0181807
FP014066	15	257.706	48.2953	5.3361	0.0001352	***	0.828581	TTC9C_2	TTC9C	0.0181807
FP013075	19	137.656	27.6066	4.9864	0.0001345	***	0.832038	LZTS2_3	LZTS2	0.0181807
FP004347	32	1581.82	354.298	4.4646	0.0001381	***	0.845908	PPARG_4	PPARG	0.0181807
FP001943	16	283.42	51.5632	5.4966	0.000137	***	0.846004	POGK_1	POGK	0.0181807
FP014513	14	1563.48	273.25	5.7218	0.0001338	***	0.865164	PANX1_1	PANX1	0.0181807
FP001540	24	2556.63	551.795	4.6333	0.0001431	***	0.710988	FAM63A_3	FAM63A	0.018394
FP012585	19	203.359	41.073	4.9512	0.0001444	***	0.777866	HNRNPF_3	HNRNPF	0.0184644
FP019824	16	3783.17	692.937	5.4596	0.0001454	***	0.844375	CCL3L3_1	CCL3L3	0.0184959
FP008570	49	427.115	103.408	4.1304	0.0001638	***	0.663	GPR116_1	GPR116	0.018532
FP019547	26	84.837	18.8123	4.5096	0.000158	***	0.685037	ADPRM_1	ADPRM	0.018532
FP012915	19	146.238	29.8963	4.8915	0.000163	***	0.701386	RNLS_1	RNLS	0.018532
FP003587	22	1163.35	244.285	4.7623	0.0001557	***	0.743246	ACVR1_3	ACVR1	0.018532
FP005204	22	2771.97	583.529	4.7504	0.0001598	***	0.74584	ABTB1_2	ABTB1	0.018532
FP012338	21	116.695	24.2575	4.8107	0.0001631	***	0.759283	GTPBP4_1	GTPBP4	0.018532
FP001829	20	345.505	71.6336	4.8232	0.0001589	***	0.760119	PYHIN1_1	PYHIN1	0.018532
FP002729	21	854.846	177.229	4.8234	0.0001588	***	0.760132	TP53I3_1	TP53I3	0.018532
FP004758	20	340.505	70.5643	4.8255	0.0001581	***	0.760268	RAD54L2_2	RAD54L2	0.018532
FP002963	20	1699.85	351.067	4.8419	0.0001527	***	0.761361	GTF2A1L_1	GTF2A1L	0.018532
FP013652	20	118.141	24.3566	4.8505	0.00015	***	0.761923	BTBD10_1	BTBD10	0.018532
FP014617	20	619.743	126.506	4.8989	0.0001606	***	0.774593	ALG9_1	ALG9	0.018532
FP022238	18	917.343	183.055	5.0113	0.0001549	***	0.791237	XRCC1_1	XRCC1	0.018532
FP024068	18	426.16	84.6684	5.0333	0.0001485	***	0.792531	PRR14L_2	PRR14L	0.018532
FP018128	15	1939.34	359.752	5.3908	0.0001625	***	0.797789	PEX11A_1	PEX11A	0.018532
FP017563	17	262.3	51.4652	5.0967	0.0001627	***	0.806096	RAD51_1	RAD51	0.018532
FP024719	16	2429.85	463.689	5.2403	0.0001595	***	0.823831	CACNA1F_1	CACNA1F	0.018532
FP000143	20	5659.02	1172.99	4.8245	0.0001585	***	0.838942	CAMTA1_2	CAMTA1	0.018532
FP002220	14	353.465	64.9625	5.4411	0.0001498	***	0.843548	CHIT1_1	CHIT1	0.018532
FP024954	23	344.92	74.583	4.6246	0.0001637	***	0.851809	FAM133A_1	FAM133A	0.018532
FP021813	14	394.483	70.4246	5.6015	0.00016	***	0.860479	SUGP2_1	SUGP2	0.018532
FP022643	14	188.152	33.3014	5.65	0.0001488	***	0.862393	ZNF331_5	ZNF331	0.018532
FP021342	14	968.629	164.746	5.8795	0.0001553	***	0.880698	ARRDC5_1	ARRDC5	0.018532
FP004125	18	318.992	64.0985	4.9766	0.0001657	***	0.789176	SPATA3_1	SPATA3	0.018661
FP009991	21	952.786	198.522	4.7994	0.0001671	***	0.758528	PIK3CG_2	PIK3CG	0.0186922
FP017934	13	206.025	33.4671	6.1561	0.0001675	***	0.898938	CD276_1	CD276	0.0186922
FP011038	18	116.138	23.3903	4.9652	0.0001694	***	0.788493	ATP6V1C1_1	ATP6V1C1	0.018734
FP001720	18	4396.19	866.231	5.0751	0.0001693	***	0.804895	FAM189B_2	FAM189B	0.018734
FP020336	22	315.595	67.716	4.6606	0.0001704	***	0.730348	PTRH2_1	PTRH2	0.01876
FP011923	21	1482.89	314.638	4.713	0.0001734	***	0.74322	AMBP_1	AMBP	0.0190051
FP023188	13	15813.6	2758.37	5.733	0.0001895	***	0.685682	CNBD2_1	CNBD2	0.0190773
FP020122	25	153.635	34.2765	4.4822	0.0001858	***	0.690881	EFTUD2_2	EFTUD2	0.0190773
FP010514	21	482.062	103.107	4.6753	0.0001884	***	0.698402	PCM1_5	PCM1	0.0190773
FP008451	23	2638.32	576.631	4.5754	0.0001835	***	0.715132	TREML1_1	TREML1	0.0190773
FP012854	26	144.116	31.8147	4.5299	0.0001831	***	0.729344	ZMIZ1_2	ZMIZ1	0.0190773
FP017795	22	354.34	76.2297	4.6483	0.0001752	***	0.729451	RORA_2	RORA	0.0190773
FP014402	22	293.572	62.7743	4.6766	0.0001878	***	0.740637	SERPINH1_1	SERPINH1	0.0190773
FP020123	22	122.394	26.1493	4.6806	0.0001862	***	0.740918	EFTUD2_1	EFTUD2	0.0190773
FP007966	21	374.908	80.0646	4.6826	0.0001854	***	0.741061	ERVFRD-1_1	ERVFRD-1	0.0190773
FP007541	21	236.761	49.8	4.7543	0.0001838	***	0.755473	KCTD16_1	KCTD16	0.0190773
FP005887	21	11413.3	2395.15	4.7652	0.0001796	***	0.756218	FBXL5_2	FBXL5	0.0190773
FP017167	19	193.077	40.0446	4.8215	0.0001879	***	0.769629	MLH3_1	MLH3	0.0190773
FP010352	19	169.767	35.0832	4.839	0.0001813	***	0.770761	WDR86_1	WDR86	0.0190773
FP006951	17	28728.8	5719.28	5.0231	0.0001863	***	0.780048	ACTBL2_1	ACTBL2	0.0190773
FP014815	18	525.847	106.78	4.9246	0.0001833	***	0.786034	ST3GAL4_3	ST3GAL4	0.0190773
FP009030	18	102.707	20.8038	4.9369	0.000179	***	0.786786	GPR126_1	GPR126	0.0190773
FP012827	17	141.421	28.2056	5.0139	0.0001896	***	0.80144	CAMK2G_1	CAMK2G	0.0190773
FP017375	15	85.5863	16.1457	5.3009	0.0001881	***	0.837104	ZNF839_1	ZNF839	0.0190773
FP019773	9	476.419	66.2161	7.1949	0.0001782	***	0.854437	SPACA3_1	SPACA3	0.0190773
FP003427	14	124.947	22.6652	5.5127	0.0001827	***	0.856877	C1QL2_1	C1QL2	0.0190773
FP024698	21	577.156	121.896	4.7348	0.0001915	***	0.754144	PQBP1_1	PQBP1	0.0191318
FP024048	17	240.8	48.1063	5.0056	0.0001925	***	0.800961	SMTN_3	SMTN	0.0191339
FP015108	19	641.163	133.643	4.7976	0.0001973	***	0.768062	HIST4H4_1	HIST4H4	0.0193756
FP015215	17	6359.35	1273.47	4.9937	0.0001968	***	0.80028	IPO8_2	IPO8	0.0193756
FP001084	21	20939.7	4438.81	4.7174	0.0001987	***	0.752943	USP33_2	USP33	0.0193972
FP022377	6	491.726	37.684	13.049	0.0001991	***	0.988457	TMEM160_1	TMEM160	0.0193972
FP022127	23	381.666	83.1506	4.5901	0.0001999	***	0.777848	AKT2_2	AKT2	0.0193982
FP001060	20	150.177	31.3977	4.7831	0.0002032	***	0.767107	FPGT_1	FPGT	0.0195638
FP001398	16	2084.57	408.577	5.102	0.000203	***	0.816657	TRIM45_1	TRIM45	0.0195638
FP020303	21	489.55	105.702	4.6314	0.0002074	***	0.669511	CUEDC1_2	CUEDC1	0.0196314
FP018782	20	230.531	49.0892	4.6962	0.0002079	***	0.751468	DNAJA2_1	DNAJA2	0.0196314
FP008740	16	4633.79	910.361	5.0901	0.0002073	***	0.816018	SPACA1_1	SPACA1	0.0196314
FP003186	17	116.95	22.9542	5.0949	0.0002056	***	0.816278	TCF7L1_1	TCF7L1	0.0196314
FP018545	12	246.889	41.28	5.9809	0.0002073	***	0.893855	GPRC5B_1	GPRC5B	0.0196314
FP005106	17	353.453	71.436	4.9478	0.0002143	***	0.797612	CD80_1	CD80	0.0201582
FP023807	11	100.791	16.9663	5.9407	0.0002178	***	0.855356	SLC19A1_2	SLC19A1	0.0204092
FP013981	20	28656.9	6140.48	4.6669	0.0002212	***	0.749419	MS4A2_1	MS4A2	0.020649
FP000727	19	407.999	86.2231	4.7319	0.0002256	***	0.485338	CTPS1_1	CTPS1	0.0207442
FP006629	22	386.057	85.0632	4.5385	0.0002247	***	0.721232	DDX60L_3	DDX60L	0.0207442
FP000974	19	209.047	44.1726	4.7325	0.0002253	***	0.763739	HOOK1_2	HOOK1	0.0207442
FP019325	17	228.052	46.293	4.9263	0.0002231	***	0.796345	SPATA22_2	SPATA22	0.0207442
FP011326	21	533.035	116.693	4.5679	0.0002385	***	0.601635	CDC37L1_1	CDC37L1	0.0214574
FP000719	22	596.974	132.258	4.5137	0.0002377	***	0.719335	ZNF684_1	ZNF684	0.0214574
FP001825	20	13529.6	2921.27	4.6314	0.0002386	***	0.746906	OR10X1_1	OR10X1	0.0214574
FP021635	18	3285.01	685.77	4.7903	0.0002384	***	0.777629	C19orf53_1	C19orf53	0.0214574
FP012302	9	400.472	51.4544	7.783	0.0002369	***	0.942716	C9orf169_1	C9orf169	0.0214574
FP003554	21	397.282	85.8493	4.6277	0.0002405	***	0.746638	NMI_1	NMI	0.0215493
FP020004	19	191.679	40.8208	4.6956	0.000243	***	0.761242	ACLY_1	ACLY	0.0216156
FP015459	16	3846.88	769.361	5.0001	0.0002429	***	0.811113	ITGB7_2	ITGB7	0.0216156
FP018572	21	1750.17	384.649	4.55	0.0002481	***	0.731382	IGSF6_1	IGSF6	0.0217539
FP016205	15	397.877	74.8828	5.3133	0.0002473	***	0.747506	GALNT9_3	GALNT9	0.0217539
FP020806	17	343.165	70.4378	4.8719	0.0002469	***	0.793092	TXNDC2_1	TXNDC2	0.0217539
FP006986	17	269.836	55.3629	4.8739	0.000246	***	0.793216	CTC-534A2.2_1	CTC-534A2.2	0.0217539
FP006985	17	254.825	52.3569	4.8671	0.0002492	***	0.792801	TRIM23_1	TRIM23	0.0217726
FP014658	21	521.646	114.834	4.5426	0.0002522	***	0.476511	ZNF259_1	ZNF259	0.0218625
FP013747	83	230.883	60.0031	3.8478	0.0002529	***	0.585029	BDNF_4	BDNF	0.0218625
FP017012	21	260.297	57.3169	4.5414	0.0002529	***	0.730731	C14orf39_1	C14orf39	0.0218625
FP002917	20	464.51	101.046	4.597	0.0002567	***	0.744437	DYNC2LI1_1	DYNC2LI1	0.0218828
FP001249	20	407.557	88.5703	4.6015	0.0002542	***	0.744761	NBPF6_1	NBPF6	0.0218828
FP021320	20	423.129	92.0236	4.5981	0.0002561	***	0.748379	FLJ10374_1	FLJ10374	0.0218828
FP023613	21	415.239	91.7756	4.5245	0.0002624	***	0.605204	MRAP_1	MRAP	0.0222144
FP007623	20	1580.16	344.513	4.5866	0.0002624	***	0.743687	ANXA6_2	ANXA6	0.0222144
FP013259	21	124.396	27.1387	4.5837	0.0002641	***	0.743476	SEC23IP_1	SEC23IP	0.0222556
FP014161	23	348.378	78.0013	4.4663	0.0002647	***	0.79141	CAPN1_4	CAPN1	0.0222556
FP014817	24	271.728	61.5753	4.4129	0.000268	***	0.445908	ST3GAL4_4	ST3GAL4	0.0223019
FP015382	24	155.734	35.6504	4.3684	0.0002693	***	0.689987	LETMD1_1	LETMD1	0.0223019
FP023377	17	1782.22	369.49	4.8235	0.0002704	***	0.790139	UBE2V1_2	UBE2V1	0.0223019
FP018754	17	8581.72	1776.86	4.8297	0.0002672	***	0.790524	C16orf98_1	C16orf98	0.0223019
FP017107	12	150.049	27.4009	5.4761	0.0002707	***	0.86598	PCNX_1	PCNX	0.0223019
FP020516	19	371.165	80.0546	4.6364	0.0002744	***	0.75716	SLC16A5_3	SLC16A5	0.0223073
FP010139	17	378.604	78.601	4.8168	0.0002738	***	0.789729	ZC3HC1_1	ZC3HC1	0.0223073
FP004037	17	127.237	26.3985	4.8199	0.0002722	***	0.789918	CNPPD1_2	CNPPD1	0.0223073
FP025170	15	167.67	33.0549	5.0725	0.0002741	***	0.825802	DCAF12L1_1	DCAF12L1	0.0223073
FP011504	68	137.228	35.6207	3.8525	0.0002764	***	0.6377	STOML2_1	STOML2	0.0223957
FP006016	21	346.993	77.2441	4.4922	0.0002818	***	0.72701	CNGA1_2	CNGA1	0.0224432
FP002685	20	208.948	45.9063	4.5516	0.0002828	***	0.741134	DDX1_2	DDX1	0.0224432
FP024073	20	11636.7	2519.17	4.6192	0.0002843	***	0.755961	DEPDC5_4	DEPDC5	0.0224432
FP011888	17	166.602	34.7257	4.7977	0.0002838	***	0.788544	HSDL2_1	HSDL2	0.0224432
FP010013	17	196.721	40.9538	4.8035	0.0002807	***	0.788906	PNPLA8_2	PNPLA8	0.0224432
FP003310	10	129.14	19.3356	6.6789	0.0002829	***	0.920423	REV1_1	REV1	0.0224432
FP001887	22	131.495	29.6924	4.4286	0.0002884	***	0.712691	B4GALT3_2	B4GALT3	0.0225012
FP006509	21	206.068	45.9724	4.4824	0.000288	***	0.763064	IL15_1	IL15	0.0225012
FP000304	15	3188.7	650.408	4.9026	0.0002887	***	0.805598	ALDH4A1_2	ALDH4A1	0.0225012
FP007055	20	283.893	62.5654	4.5375	0.0002914	***	0.740097	HEXB_1	HEXB	0.0225683
FP007770	15	120.789	24.6602	4.8981	0.0002911	***	0.805338	HRH2_1	HRH2	0.0225683
FP007478	21	1171.9	258.757	4.5289	0.0002968	***	0.739462	PCDHB8_1	PCDHB8	0.0229143
FP011893	18	95.0742	20.3391	4.6745	0.0002994	***	0.835292	SLC46A2_1	SLC46A2	0.0229372
FP021035	16	237.623	47.3501	5.0184	0.0002999	***	0.854459	ONECUT2_1	ONECUT2	0.0229372
FP008704	14	15942.2	2949.42	5.4052	0.0002992	***	0.863136	IBTK_2	IBTK	0.0229372
FP001086	22	442.929	100.51	4.4068	0.000303	***	0.710963	FAM73A_1	FAM73A	0.0231023
FP015399	64	154.793	40.3264	3.8385	0.0003127	***	0.548758	SLC4A8_3	SLC4A8	0.0235374
FP000607	20	4175.49	927.203	4.5033	0.0003135	***	0.737557	PHC2_3	PHC2	0.0235374
FP000156	17	385.541	81.2317	4.7462	0.0003127	***	0.785312	CA6_1	CA6	0.0235374
FP003160	17	1530.22	322.347	4.7471	0.0003121	***	0.785371	M1AP_1	M1AP	0.0235374
FP015093	18	20038.8	4221.26	4.7471	0.0003121	***	0.785371	APOLD1_2	APOLD1	0.0235374
FP001721	22	149.659	34.0885	4.3903	0.0003146	***	0.70964	FAM189B_1	FAM189B	0.023548
FP015184	21	472.059	104.954	4.4978	0.0003173	***	0.573419	SSPN_1	SSPN	0.0236056
FP003618	98	2044.59	545.59	3.7475	0.0003188	***	0.627868	FAP_1	FAP	0.0236056
FP014695	25	341.734	80.2754	4.257	0.0003221	***	0.672068	CD3D_1	CD3D	0.0236056
FP011147	22	192.53	43.4084	4.4353	0.0003195	***	0.722629	FAM49B_2	FAM49B	0.0236056
FP002573	18	101.642	21.9009	4.641	0.0003199	***	0.767773	KIF26B_1	KIF26B	0.0236056
FP022919	17	370.565	78.3263	4.731	0.0003218	***	0.784348	GNRH2_1	GNRH2	0.0236056
FP019260	16	305.245	61.3374	4.9765	0.0003217	***	0.839964	RPH3AL_1	RPH3AL	0.0236056
FP001006	17	3961.26	854.776	4.6343	0.0003242	***	0.767317	RAVER2_2	RAVER2	0.0236888
FP003909	22	809.493	182.953	4.4246	0.0003272	***	0.721792	CARF_1	CARF	0.0238371
FP023691	17	619.784	128.402	4.8269	0.0003305	***	0.801163	DSCR4_1	DSCR4	0.0238939
FP014253	15	8768.08	1767.36	4.9611	0.0003301	***	0.833233	KDM2A_3	KDM2A	0.0238939
FP018375	18	191.537	41.4705	4.6186	0.0003344	***	0.76625	MMP25_1	MMP25	0.0240054
FP020716	8	181.436	24.8113	7.3126	0.0003338	***	0.948218	CCDC57_1	CCDC57	0.0240054
FP012896	19	365.273	79.166	4.614	0.0003375	***	0.765933	MMRN2_1	MMRN2	0.0241014
FP010422	20	325.554	72.9316	4.4638	0.0003412	***	0.734587	DEFA6_1	DEFA6	0.0241406
FP003950	17	326.864	69.5011	4.703	0.0003393	***	0.78255	IDH1_3	IDH1	0.0241406
FP021741	5	326.84	17.5911	18.5799	0.0003403	***	0.995683	BST2_1	BST2	0.0241406
FP018643	21	1565.15	351.205	4.4565	0.0003465	***	0.364673	ATP2A1_2	ATP2A1	0.0244452
FP013285	21	89.8166	20.4364	4.3949	0.0003494	***	0.719463	CUZD1_1	CUZD1	0.0245089
FP004356	20	2043.88	458.958	4.4533	0.0003489	***	0.733787	RPL32_2	RPL32	0.0245089
FP011307	17	390.729	83.4448	4.6825	0.0003527	***	0.781221	KANK1_6	KANK1	0.0246699
FP013540	21	361.27	82.3451	4.3873	0.0003553	***	0.710384	PRKCDBP_1	PRKCDBP	0.024711
FP019804	24	386.391	90.016	4.2925	0.0003551	***	0.717954	PEX12_1	PEX12	0.024711
FP012881	18	169.761	37.036	4.5837	0.0003584	***	0.76384	CDHR1_1	CDHR1	0.0248
FP010332	16	1930.94	403.845	4.7814	0.0003586	***	0.798434	ASIC3_1	ASIC3	0.0248
FP011599	102	340.099	91.866	3.7021	0.0003623	***	0.510671	TRPM3_2	TRPM3	0.0248459
FP022616	15	543.067	110.67	4.9071	0.0003616	***	0.746837	ZNF701_2	ZNF701	0.0248459
FP022925	17	873.317	187.009	4.6699	0.0003612	***	0.780403	ITPA_1	ITPA	0.0248459
FP004188	18	229.28	50.1231	4.5743	0.0003651	***	0.763189	COPS8_1	COPS8	0.0249682
FP019565	20	297.117	67.0813	4.4292	0.0003674	***	0.731947	TEKT3_1	TEKT3	0.0250515
FP021433	16	268.957	56.4635	4.7634	0.0003704	***	0.797339	SNAPC2_2	SNAPC2	0.0250515
FP017536	16	282.233	59.25	4.7634	0.0003704	***	0.797343	GPR176_1	GPR176	0.0250515
FP009272	16	110.132	23.1072	4.7661	0.0003686	***	0.797508	PAPOLB_1	PAPOLB	0.0250515
FP022512	21	276.553	63.404	4.3618	0.000376	***	0.449267	AKT1S1_2	AKT1S1	0.0253604
FP017436	18	404.671	87.1404	4.6439	0.0003795	***	0.778693	MTA1_3	MTA1	0.0254566
FP022798	16	7054.36	1484.89	4.7508	0.0003789	***	0.79657	ZNF550_2	ZNF550	0.0254566
FP015017	15	437.545	89.803	4.8723	0.0003835	***	0.735515	ZNF705A_1	ZNF705A	0.0254733
FP017951	18	2189.24	481.248	4.5491	0.0003839	***	0.761423	STRA6_1	STRA6	0.0254733
FP001425	16	4405.45	928.504	4.7447	0.0003831	***	0.796195	NBPF8_2	NBPF8	0.0254733
FP008128	16	4712.85	992.626	4.7479	0.0003809	***	0.796391	ZSCAN31_2	ZSCAN31	0.0254733
FP014639	22	3341.58	768.792	4.3465	0.0003889	***	0.715607	USP28_2	USP28	0.0255975
FP024582	17	1380.18	297.9	4.633	0.0003874	***	0.777975	MAGEB2_1	MAGEB2	0.0255975
FP011796	13	231.457	46.0808	5.0229	0.0003883	***	0.834492	COL15A1_1	COL15A1	0.0255975
FP009286	20	268.931	60.217	4.466	0.00039	***	0.744904	RSPH10B_1	RSPH10B	0.0256013
FP002298	22	220.59	51.4024	4.2914	0.000394	***	0.701571	CR2_1	CR2	0.0257102
FP013869	19	123.406	27.2093	4.5354	0.0003945	***	0.760459	DGKZ_4	DGKZ	0.0257102
FP015896	16	335.062	70.8694	4.7279	0.0003948	***	0.79516	C12orf73_1	C12orf73	0.0257102
FP013674	19	889.542	199.519	4.4584	0.0003962	***	0.744339	RPS13_1	RPS13	0.0257331
FP012442	17	317.244	68.7003	4.6178	0.0003987	***	0.776962	PTER_1	PTER	0.0258271
FP006058	18	189.014	41.7546	4.5268	0.0004013	***	0.759846	EXOC1_1	EXOC1	0.0259271
FP002834	19	489.563	110.164	4.4439	0.0004083	***	0.695133	ALK_2	ALK	0.0260368
FP004312	18	164.117	36.3175	4.5189	0.0004076	***	0.75929	JAGN1_1	JAGN1	0.0260368
FP008254	29	545.619	132.109	4.1301	0.0004071	***	0.79027	DDAH2_1	DDAH2	0.0260368
FP005886	14	737.859	147.741	4.9943	0.0004062	***	0.833041	CC2D2A_2	CC2D2A	0.0260368
FP017581	7	31386.9	3767.85	8.3302	0.0004076	***	0.968	NUSAP1_2	NUSAP1	0.0260368
FP016308	17	215.005	46.7492	4.5991	0.0004132	***	0.775712	SLC46A3_1	SLC46A3	0.026281
FP016735	44	154.899	40.1598	3.8571	0.0004188	***	0.549891	AJUBA_1	AJUBA	0.0262966
FP015365	22	2304.16	534.225	4.3131	0.0004188	***	0.688825	GPD1_1	GPD1	0.0262966
FP009962	18	109.685	24.3426	4.5059	0.0004184	***	0.758357	NAPEPLD_1	NAPEPLD	0.0262966
FP011351	16	399.224	84.954	4.6993	0.0004157	***	0.793382	TPD52L3_1	TPD52L3	0.0262966
FP008862	16	91.6002	18.9926	4.8229	0.000417	***	0.812206	HDAC2_2	HDAC2	0.0262966
FP004993	21	6531.69	1496.22	4.3655	0.0004213	***	0.726998	TMEM45A_2	TMEM45A	0.0263861
FP004091	59	98.9335	26.2949	3.7625	0.0004287	***	0.441154	IRS1_1	IRS1	0.0264428
FP023385	43	119.462	30.9334	3.8619	0.0004244	***	0.609699	PARD6B_1	PARD6B	0.0264428
FP000810	26	355.919	86.6274	4.1086	0.0004294	***	0.650601	TCTEX1D4_1	TCTEX1D4	0.0264428
FP014136	20	193.914	43.9005	4.4171	0.0004316	***	0.74124	EHD1_2	EHD1	0.0264428
FP021170	19	1229.15	277.891	4.4232	0.0004263	***	0.741695	PRTN3_1	PRTN3	0.0264428
FP005768	16	5844.81	1249.37	4.6782	0.0004319	***	0.792058	TMEM129_2	TMEM129	0.0264428
FP021148	16	3377.72	721.723	4.6801	0.0004304	***	0.792175	THEG_1	THEG	0.0264428
FP024810	22	626.252	147.063	4.2584	0.0004248	***	0.795573	UBQLN2_1	UBQLN2	0.0264428
FP011340	14	101.712	21.1682	4.805	0.0004299	***	0.811172	CD274_1	CD274	0.0264428
FP024135	21	224.037	52.1488	4.2961	0.0004348	***	0.711521	SSTR3_1	SSTR3	0.0265542
FP017765	18	350.241	76.6791	4.5676	0.0004387	***	0.773583	TCF12_4	TCF12	0.0267259
FP024641	20	3503.83	806.443	4.3448	0.0004404	***	0.725371	KRBOX4_1	KRBOX4	0.026763
FP000673	24	428.579	102.088	4.1981	0.0004427	***	0.684418	MTF1_1	MTF1	0.0267703
FP006748	9	146.642	21.1125	6.9458	0.0004417	***	0.939431	LPCAT1_1	LPCAT1	0.0267703
FP001418	20	282.829	65.1927	4.3384	0.0004466	***	0.724861	ADAM30_1	ADAM30	0.0268737
FP017541	39	1055.57	272.343	3.8759	0.0004463	***	0.7438	BMF_2	BMF	0.0268737
FP015556	18	719.522	160.927	4.4711	0.0004484	***	0.755855	RPS26_1	RPS26	0.0269161
FP012542	24	33158.5	7989.69	4.1502	0.0004538	***	0.442184	C10orf68_1	C10orf68	0.0270419
FP011242	19	222.509	49.8252	4.4658	0.0004532	***	0.755468	PLEC_4	PLEC	0.0270419
FP019106	14	296.204	60.1413	4.9251	0.0004532	***	0.813989	WDR59_1	WDR59	0.0270419
FP014884	18	762.549	171.171	4.4549	0.0004632	***	0.556227	WNT5B_2	WNT5B	0.0270762
FP011535	19	1194.58	272.47	4.3843	0.0004621	***	0.738741	GNE_2	GNE	0.0270762
FP012672	19	1021.73	232.952	4.386	0.0004604	***	0.738874	ZWINT_1	ZWINT	0.0270762
FP023892	19	7105.47	1620.11	4.3858	0.0004606	***	0.769757	SERPIND1_2	SERPIND1	0.0270762
FP021222	17	356.396	76.7847	4.6415	0.0004616	***	0.789724	TCF3_2	TCF3	0.0270762
FP005483	17	2493.66	536.533	4.6477	0.0004564	***	0.790122	BCHE_1	BCHE	0.0270762
FP015072	5	27615	1644.37	16.794	0.0004597	***	0.994723	TAS2R43_1	TAS2R43	0.0270762
FP021379	6	15304.7	911.335	16.794	0.0004597	***	0.994723	SLC25A41_1	SLC25A41	0.0270762
FP000705	19	4863.91	1093.27	4.449	0.0004687	***	0.595817	PPT1_1	PPT1	0.0271043
FP019583	22	657.816	154.35	4.2619	0.0004692	***	0.708703	PIGL_1	PIGL	0.0271043
FP022253	17	391.187	87.935	4.4486	0.000469	***	0.754216	LYPD5_1	LYPD5	0.0271043
FP012789	18	128.93	28.416	4.5372	0.0004649	***	0.771502	ASCC1_1	ASCC1	0.0271043
FP016683	17	1406.3	303.332	4.6362	0.0004661	***	0.789381	ANG_2	ANG	0.0271043
FP018071	19	2866.28	644.812	4.4451	0.0004723	***	0.753963	CPEB1_3	CPEB1	0.0271728
FP019534	20	243.387	56.4603	4.3108	0.0004739	***	0.722662	GAS7_6	GAS7	0.0271839
FP018506	16	347.311	75.1602	4.6209	0.0004791	***	0.788402	C16orf45_2	C16orf45	0.0274181
FP006368	21	378.453	89.0955	4.2477	0.0004841	***	0.70753	TBCK_1	TBCK	0.0275346
FP025268	17	171.287	37.0996	4.617	0.0004826	***	0.740667	ZIC3_1	ZIC3	0.0275346
FP012701	18	218.655	49.3314	4.4324	0.0004845	***	0.753026	C10orf107_1	C10orf107	0.0275346
FP016901	18	870.498	196.634	4.427	0.0004897	***	0.752631	FANCM_1	FANCM	0.0276382
FP008775	16	373.833	81.0894	4.6101	0.0004886	***	0.787703	COQ3_1	COQ3	0.0276382
FP018132	13	145.334	28.6963	5.0646	0.0004887	***	0.848231	ANPEP_1	ANPEP	0.0276382
FP008226	46	355.177	93.4181	3.802	0.0004926	***	0.275679	LTB_1	LTB	0.0277012
FP006032	16	293.372	65.1114	4.5057	0.0004938	***	0.769319	CWH43_1	CWH43	0.0277012
FP006227	14	1012.91	207.961	4.8707	0.0004942	***	0.826565	PLAC8_2	PLAC8	0.0277012
FP004195	21	1276.91	301.706	4.2323	0.000501	***	0.68425	RAB17_1	RAB17	0.0278208
FP019988	20	135.737	31.6743	4.2854	0.0005005	***	0.720621	KRT19_1	KRT19	0.0278208
FP008867	20	352.688	82.267	4.2871	0.0004986	***	0.72076	NT5DC1_2	NT5DC1	0.0278208
FP021819	16	823.961	179.308	4.5952	0.000502	***	0.786734	RFXANK_1	RFXANK	0.0278208
FP017878	14	84.0465	17.8273	4.7145	0.0005017	***	0.80585	C15orf61_1	C15orf61	0.0278208
FP022606	16	3105.05	676.11	4.5925	0.0005045	***	0.786557	ZNF766_2	ZNF766	0.0278964
FP006029	17	213.048	47.4561	4.4894	0.0005095	***	0.768178	OCIAD1_1	OCIAD1	0.0281095
FP002464	15	166.23	35.4201	4.6931	0.0005204	***	0.804562	TRIM17_1	TRIM17	0.0286465
FP018566	21	373.461	87.5803	4.2642	0.0005238	***	0.718902	ZP2_1	ZP2	0.0287323
FP007492	17	279.014	62.3578	4.4744	0.0005243	***	0.767126	PCDHGB2_1	PCDHGB2	0.0287323
FP017745	23	444.614	108.004	4.1166	0.0005356	***	0.332606	RAB27A_2	RAB27A	0.0289638
FP021204	23	312.325	75.955	4.112	0.0005414	***	0.489457	MUM1_2	MUM1	0.0289638
FP007475	22	1621.65	390.484	4.1529	0.0005404	***	0.689794	PCDHB5_1	PCDHB5	0.0289638
FP008506	21	105.761	25.1944	4.1978	0.0005409	***	0.703341	PTK7_2	PTK7	0.0289638
FP001873	21	2664.88	634.048	4.203	0.0005347	***	0.703777	ITLN1_1	ITLN1	0.0289638
FP003003	17	228.339	52.1707	4.3768	0.0005415	***	0.748892	FANCL_1	FANCL	0.0289638
FP025341	16	131.064	29.3304	4.4685	0.0005302	***	0.766712	GABRE_1	GABRE	0.0289638
FP020191	16	302.264	66.3755	4.5539	0.0005413	***	0.784011	SNX11_1	SNX11	0.0289638
FP017896	16	329.031	72.2185	4.556	0.0005392	***	0.784157	PAQR5_2	PAQR5	0.0289638
FP019799	16	2126.8	466.131	4.5627	0.0005327	***	0.784594	SLFN12_1	SLFN12	0.0289638
FP025369	15	6686.25	1431.45	4.671	0.0005406	***	0.803218	ATP2B3_1	ATP2B3	0.0289638
FP015236	21	425.094	101.353	4.1942	0.0005452	***	0.681949	YARS2_1	YARS2	0.0290019
FP013971	22	225.826	53.8862	4.1908	0.0005493	***	0.702747	MPEG1_1	MPEG1	0.0290019
FP009912	19	338.853	78.7774	4.3014	0.0005491	***	0.732297	GIGYF1_1	GIGYF1	0.0290019
FP010980	18	21719.4	4968.62	4.3713	0.0005475	***	0.748482	INTS8_2	INTS8	0.0290019
FP005503	18	145.401	32.635	4.4554	0.0005438	***	0.765777	PHC3_1	PHC3	0.0290019
FP001168	15	75.7767	16.2663	4.6585	0.0005523	***	0.802457	RPAP2_1	RPAP2	0.0290977
FP004297	39	237.808	62.3887	3.8117	0.0005535	***	0.663234	LHFPL4_1	LHFPL4	0.0290985
FP005857	17	4418.13	994.234	4.4437	0.000556	***	0.76495	PSAPL1_1	PSAPL1	0.0291674
FP012687	23	16211.2	3918.02	4.1376	0.0005596	***	0.504869	C10orf40_1	C10orf40	0.0292523
FP017656	17	1943.65	428.566	4.5352	0.00056	***	0.782771	SPG11_2	SPG11	0.0292523
FP007222	20	348.771	82.5015	4.2275	0.000567	***	0.715887	TSSK1B_1	TSSK1B	0.029555
FP023642	23	327.044	79.2488	4.1268	0.0005736	***	0.687509	DONSON_1	DONSON	0.0298357
FP004220	15	39.2118	8.21348	4.7741	0.0005769	***	0.821266	MYEOV2_1	MYEOV2	0.0299439
FP017737	46	150.265	40.1884	3.739	0.0005784	***	0.579774	FAM214A_2	FAM214A	0.0299584
FP015608	36	178.306	46.6905	3.8189	0.0005809	***	0.606183	NAB2_1	NAB2	0.029977
FP013837	15	306.318	66.1758	4.6289	0.0005812	***	0.800626	HSD17B12_1	HSD17B12	0.029977
FP012884	21	397.837	95.6326	4.1601	0.0005882	***	0.700123	RGR_1	RGR	0.0299807
FP024671	22	209.736	50.3825	4.1629	0.0005845	***	0.700365	ZNF630_2	ZNF630	0.0299807
FP021090	20	371.071	88.0499	4.2143	0.0005833	***	0.714801	SERPINB8_1	SERPINB8	0.0299807
FP020737	18	298.154	67.5451	4.4141	0.0005886	***	0.762823	ZNF750_1	ZNF750	0.0299807
FP016503	16	992.02	219.997	4.5092	0.0005873	***	0.781025	UCHL3_1	UCHL3	0.0299807
FP015875	14	162.433	35.1328	4.6234	0.0005867	***	0.800287	UTP20_1	UTP20	0.0299807
FP004600	21	466.882	112.29	4.1578	0.0005911	***	0.473745	CXCR6_2	CXCR6	0.0300371
FP023183	52	177.62	48.0756	3.6946	0.0005946	***	0.529042	NFS1_1	NFS1	0.0300371
FP007018	21	5705.04	1372.46	4.1568	0.0005924	***	0.699845	RAD17_6	RAD17	0.0300371
FP017077	17	142.248	32.2599	4.4094	0.0005939	***	0.762482	RAD51B_1	RAD51B	0.0300371
FP019977	24	155.259	38.5494	4.0275	0.0006083	***	0.660154	KRTAP17-1_1	KRTAP17-1	0.0300725
FP004117	22	2015.94	486.733	4.1418	0.0006126	***	0.69855	SP100_2	SP100	0.0300725
FP008917	21	34419.2	8293.3	4.1502	0.0006012	***	0.69928	TPD52L1_3	TPD52L1	0.0300725
FP024479	19	189.513	44.6145	4.2478	0.000614	***	0.728023	TCEANC_1	TCEANC	0.0300725
FP007437	17	375.349	83.5189	4.4942	0.0006037	***	0.732441	ANKHD1_5	ANKHD1	0.0300725
FP018223	18	173.113	40.1329	4.3135	0.0006149	***	0.744081	MRPL28_1	MRPL28	0.0300725
FP015850	18	5005.81	1156.83	4.3272	0.0005982	***	0.745132	NEDD1_3	NEDD1	0.0300725
FP009862	17	822.286	187.097	4.395	0.0006107	***	0.761433	TRIM4_1	TRIM4	0.0300725
FP024234	17	313.854	71.2622	4.4042	0.0005999	***	0.762104	CHADL_1	CHADL	0.0300725
FP010111	13	728.841	148.383	4.9119	0.0006122	***	0.762197	IMPDH1_1	IMPDH1	0.0300725
FP003054	16	57863.2	12895.2	4.4872	0.0006115	***	0.779529	C1D_2	C1D	0.0300725
FP009372	17	1216.31	270.849	4.4907	0.0006075	***	0.779771	TOMM7_1	TOMM7	0.0300725
FP007950	17	331.662	73.7831	4.4951	0.0006027	***	0.780066	TFAP2A_3	TFAP2A	0.0300725
FP019272	11	190.153	34.885	5.4509	0.0006081	***	0.887618	ABR_6	ABR	0.0300725
FP016199	9	89.7823	13.7258	6.5411	0.0006103	***	0.936491	PUS1_1	PUS1	0.0300725
FP002709	14	206.482	44.9597	4.5926	0.0006188	***	0.626534	SDC1_2	SDC1	0.0301578
FP015692	20	820.351	195.94	4.1867	0.0006191	***	0.712501	LLPH_1	LLPH	0.0301578
FP003482	18	129.912	30.6467	4.239	0.0006254	***	0.591016	MZT2B_1	MZT2B	0.0301886
FP024583	25	11716	2917.67	4.0155	0.000626	***	0.659042	MAGEB3_1	MAGEB3	0.0301886
FP005146	20	224.71	53.7836	4.178	0.0006308	***	0.711771	DTX3L_1	DTX3L	0.0301886
FP022659	19	729.954	172.164	4.2399	0.0006243	***	0.727384	PRPF31_1	PRPF31	0.0301886
FP005374	17	253.148	57.8045	4.3794	0.0006293	***	0.760293	PLSCR1_1	PLSCR1	0.0301886
FP017529	24	419.233	104.442	4.014	0.0006283	***	0.76727	FAM98B_1	FAM98B	0.0301886
FP002122	16	2066.83	462.297	4.4708	0.0006301	***	0.778406	C1orf27_2	C1orf27	0.0301886
FP007626	16	211.347	47.2031	4.4774	0.0006225	***	0.778861	GM2A_1	GM2A	0.0301886
FP004978	15	282.066	61.453	4.5899	0.0006216	***	0.79819	CPOX_1	CPOX	0.0301886
FP024648	28	211.334	54.1277	3.9044	0.0006331	***	0.701586	P17_1	P17	0.0302192
FP003489	18	338.062	78.6498	4.2983	0.0006339	***	0.742908	CFC1B_1	CFC1B	0.0302192
FP001800	20	382.669	91.6854	4.1737	0.0006367	***	0.711408	SH2D2A_1	SH2D2A	0.0302495
FP012764	18	1267.39	289.816	4.3731	0.000637	***	0.759833	LRRC20_1	LRRC20	0.0302495
FP018876	22	194.217	47.6204	4.0784	0.0006405	***	0.683226	COQ9_1	COQ9	0.0303488
FP017979	18	896.296	208.858	4.2914	0.0006428	***	0.742372	COMMD4_1	COMMD4	0.0303488
FP020832	14	288.68	63.1458	4.5716	0.0006417	***	0.79703	CEP192_1	CEP192	0.0303488
FP013860	18	242.201	56.4982	4.2869	0.0006487	***	0.757981	C11orf94_1	C11orf94	0.0304705
FP025416	15	7927.64	1736.63	4.565	0.0006491	***	0.796605	DNASE1L1_1	DNASE1L1	0.0304705
FP022260	19	251.887	59.6862	4.2202	0.0006505	***	0.725787	ZNF155_1	ZNF155	0.0304779
FP006168	65	278.211	77.1679	3.6053	0.0006566	***	0.4769	USO1_1	USO1	0.03054
FP022173	18	238.565	55.7301	4.2807	0.0006568	***	0.741541	CCDC97_1	CCDC97	0.03054
FP014775	15	139.88	30.6838	4.5588	0.0006561	***	0.79621	SIAE_1	SIAE	0.03054
FP014847	21	164.653	40.081	4.108	0.0006603	***	0.408355	SNX19_1	SNX19	0.0305868
FP014622	17	1440.5	330.81	4.3545	0.0006603	***	0.75846	DLAT_1	DLAT	0.0305868
FP018568	14	5947.39	1268.93	4.6869	0.0006641	***	0.816294	CRYM_1	CRYM	0.0306198
FP017404	13	155.305	31.9823	4.856	0.0006654	***	0.837978	TDRD9_1	TDRD9	0.0306198
FP018245	15	132.616	28.3055	4.6852	0.000666	***	0.850633	JMJD8_1	JMJD8	0.0306198
FP002743	20	139.155	33.5578	4.1467	0.000675	***	0.709125	POMC_1	POMC	0.0307867
FP007700	17	458.06	105.406	4.3457	0.0006716	***	0.723938	PTTG1_1	PTTG1	0.0307867
FP002708	17	888.861	204.675	4.3428	0.0006753	***	0.757594	LAPTM4A_1	LAPTM4A	0.0307867
FP011210	14	147.106	31.4595	4.676	0.0006759	***	0.81566	ZNF696_1	ZNF696	0.0307867
FP008391	14	363.608	75.0348	4.8459	0.0006755	***	0.837458	CLPSL2_1	CLPSL2	0.0307867
FP013039	21	190.233	46.4373	4.0965	0.0006774	***	0.694613	PYROXD2_1	PYROXD2	0.0307979
FP022950	25	104.973	26.374	3.9801	0.0006813	***	0.655737	ADRA1D_1	ADRA1D	0.0308609
FP015136	98	682.99	194.155	3.5178	0.0006876	***	0.309891	PLCZ1_1	PLCZ1	0.0309768
FP012049	21	216.49	53.0289	4.0825	0.0006989	***	0.693377	TTC16_1	TTC16	0.0309768
FP011451	20	726.401	175.862	4.1305	0.000699	***	0.707743	DNAJA1_2	DNAJA1	0.0309768
FP001968	22	6985.48	1689.99	4.1334	0.0006946	***	0.707992	TBX19_1	TBX19	0.0309768
FP007827	19	260.663	62.142	4.1947	0.0006861	***	0.723699	COL23A1_1	COL23A1	0.0309768
FP005380	28	404.893	104.616	3.8703	0.0006908	***	0.726885	CPA3_1	CPA3	0.0309768
FP011818	17	312.591	72.2014	4.3294	0.000693	***	0.756598	BAAT_1	BAAT	0.0309768
FP006813	16	81.9482	18.5535	4.4169	0.0006957	***	0.774665	GOLPH3_1	GOLPH3	0.0309768
FP012582	14	187.871	40.3001	4.6618	0.0006917	***	0.814826	FXYD4_1	FXYD4	0.0309768
FP012781	14	4206.44	902.211	4.6624	0.0006911	***	0.814859	PSAP_1	PSAP	0.0309768
FP007110	11	133.208	24.9625	5.3363	0.0006972	***	0.854118	DHFR_1	DHFR	0.0309768
FP022208	25	374.782	93.6794	4.0007	0.0007024	***	0.667446	ZNF526_1	ZNF526	0.0310714
FP006057	14	133.424	28.6883	4.6508	0.0007042	***	0.814179	NMU_1	NMU	0.031095
FP003538	29	686.186	178.962	3.8343	0.0007192	***	0.668358	ZEB2_1	ZEB2	0.0313783
FP022750	21	2034.27	500.538	4.0642	0.000728	***	0.691754	CCDC106_1	CCDC106	0.0313783
FP006196	22	638.515	156.928	4.0688	0.0007205	***	0.69217	ANXA3_1	ANXA3	0.0313783
FP005375	21	156.101	38.3307	4.0725	0.0007147	***	0.692492	ZIC4_2	ZIC4	0.0313783
FP006185	21	11223.4	2723.55	4.1209	0.0007138	***	0.706915	SHROOM3_1	SHROOM3	0.0313783
FP023640	20	171.24	41.1457	4.1618	0.0007349	***	0.720983	DONSON_3	DONSON	0.0313783
FP000266	18	3626.24	843.244	4.3004	0.000733	***	0.754413	ZBTB17_1	ZBTB17	0.0313783
FP003086	17	4083.49	949.572	4.3003	0.0007331	***	0.754413	ADD2_3	ADD2	0.0313783
FP017446	17	3495.04	812.734	4.3003	0.0007331	***	0.754413	TUBGCP5_1	TUBGCP5	0.0313783
FP023953	17	7813.87	1817.03	4.3003	0.0007331	***	0.754413	ADORA2A_4	ADORA2A	0.0313783
FP023735	17	330.735	76.8785	4.302	0.0007306	***	0.754541	ABCG1_2	ABCG1	0.0313783
FP001856	17	225.888	52.4467	4.307	0.0007237	***	0.754915	ATP1A4_1	ATP1A4	0.0313783
FP022153	17	335.207	77.7148	4.3133	0.0007149	***	0.755389	MIA_1	MIA	0.0313783
FP016658	17	3845.19	875.531	4.3918	0.0007285	***	0.772901	UPF3A_3	UPF3A	0.0313783
FP014583	14	151.414	32.7002	4.6304	0.000728	***	0.812968	ACAT1_1	ACAT1	0.0313783
FP017904	14	1377.37	297.124	4.6357	0.0007217	***	0.813283	UACA_1	UACA	0.0313783
FP018763	15	208.129	46.3124	4.494	0.0007342	***	0.814708	ZNF843_1	ZNF843	0.0313783
FP006675	27	162.505	41.9991	3.8693	0.0007327	***	0.852388	ING2_1	ING2	0.0313783
FP009577	20	258.312	62.9521	4.1033	0.0007414	***	0.705403	ZPBP_1	ZPBP	0.0314372
FP023922	15	439.085	97.7834	4.4904	0.0007389	***	0.791775	LL22NC03-63E9.3_1	LL22NC03-63E9.3	0.0314372
FP005149	14	320.783	69.4136	4.6213	0.0007388	***	0.812429	PARP15_2	PARP15	0.0314372
FP023189	13	2845.51	594.703	4.7848	0.0007404	***	0.834262	EPB41L1_1	EPB41L1	0.0314372
FP007312	14	122.188	27.2374	4.486	0.0007446	***	0.791487	P4HA2_1	P4HA2	0.0315184
FP011559	19	124.727	30.0215	4.1546	0.0007461	***	0.720381	IGFBPL1_1	IGFBPL1	0.0315275
FP005020	22	6344.55	1565.93	4.0516	0.0007486	***	0.690639	BBX_2	BBX	0.0315788
FP007179	16	310.05	70.8503	4.3761	0.0007499	***	0.771785	FAM174A_1	FAM174A	0.0315794
FP009008	17	334.431	78.0024	4.2874	0.0007516	***	0.753435	IFNGR1_2	IFNGR1	0.0315968
FP007168	19	202.666	48.8371	4.1498	0.0007536	***	0.719986	CAST_5	CAST	0.0316267
FP018238	17	143.328	33.4516	4.2847	0.0007557	***	0.753223	WFIKKN1_1	WFIKKN1	0.0316607
FP000925	12	152.529	30.6381	4.9784	0.0007611	***	0.856509	LRP8_2	LRP8	0.0318327
FP004644	21	2104.85	520.619	4.043	0.0007632	***	0.689867	CAMP_1	CAMP	0.0318662
FP014928	14	3435.39	747.066	4.5985	0.0007668	***	0.793004	PLEKHG6_2	PLEKHG6	0.0319622
FP018446	20	91.1058	22.0085	4.1396	0.00077	***	0.742959	METTL22_1	METTL22	0.0320324
FP001236	18	4060	950.081	4.2733	0.0007724	***	0.752359	AMY2A_1	AMY2A	0.0320324
FP007782	16	319.25	73.217	4.3603	0.0007721	***	0.770655	CDHR2_1	CDHR2	0.0320324
FP022696	14	1732.32	377.988	4.583	0.0007865	***	0.810118	KIR2DL4_3	KIR2DL4	0.0324527
FP002909	14	4685.26	1022.77	4.5809	0.0007891	***	0.809993	MTA3_4	MTA3	0.0325054
FP011743	19	478.997	116.13	4.1247	0.0007944	***	0.648559	FBP2_1	FBP2	0.0325844
FP016883	19	251.466	60.9588	4.1252	0.0007935	***	0.717916	SEC23A_1	SEC23A	0.0325844
FP006714	7	1312.06	181.737	7.2195	0.000795	***	0.959844	F11_1	F11	0.0325844
FP022967	23	299.404	75.2171	3.9805	0.000801	***	0.717077	CHGB_1	CHGB	0.0326125
FP019405	17	753.365	173.537	4.3412	0.0007998	***	0.769279	AIPL1_1	AIPL1	0.0326125
FP019394	15	280.624	63.1321	4.445	0.0007998	***	0.788763	C1QBP_1	C1QBP	0.0326125
FP012568	14	125.909	27.5283	4.5738	0.0007984	***	0.809558	ZNF248_2	ZNF248	0.0326125
FP003836	19	50.4451	12.2455	4.1195	0.0008031	***	0.717435	COQ10B_1	COQ10B	0.0326439
FP012202	19	2833.69	689.197	4.1116	0.0008165	***	0.392516	ADAMTS13_1	ADAMTS13	0.0327133
FP004068	22	206.081	51.3157	4.0159	0.0008105	***	0.687438	EPHA4_1	EPHA4	0.0327133
FP011756	18	974.721	233.255	4.1788	0.0008068	***	0.733433	ERCC6L2_1	ERCC6L2	0.0327133
FP020720	17	1709.73	402.656	4.2461	0.0008142	***	0.75027	SLC16A3_4	SLC16A3	0.0327133
FP002306	19	1581.14	384.37	4.1136	0.0008131	***	0.750737	LAMB3_2	LAMB3	0.0327133
FP010121	17	81.0899	18.728	4.3299	0.0008168	***	0.768456	FLNC_1	FLNC	0.0327133
FP018437	13	652.756	143.139	4.5603	0.0008163	***	0.808732	NAGPA_1	NAGPA	0.0327133
FP018484	10	282.685	45.5597	6.2047	0.0008083	***	0.930142	TXNDC11_1	TXNDC11	0.0327133
FP002599	5	511.883	36.9125	13.8675	0.0008117	***	0.99229	OR2T11_1	OR2T11	0.0327133
FP015965	19	287.825	70.0199	4.1106	0.0008182	***	0.716684	MVK_1	MVK	0.032716
FP024133	20	620.689	153.063	4.0551	0.0008229	***	0.37364	IL2RB_1	IL2RB	0.0327201
FP023980	27	385.301	100.805	3.8223	0.0008246	***	0.615137	CRYBA4_1	CRYBA4	0.0327201
FP005144	21	167.291	41.2715	4.0534	0.0008259	***	0.701055	KPNA1_1	KPNA1	0.0327201
FP017413	19	77.6756	18.9157	4.1064	0.0008254	***	0.716327	SIVA1_1	SIVA1	0.0327201
FP006667	16	350.74	81.1219	4.3236	0.0008263	***	0.768	RP11-389E17.1_1	RP11-389E17.1	0.0327201
FP008135	13	291.984	61.9078	4.7164	0.0008209	***	0.830585	ZNF311_1	ZNF311	0.0327201
FP001074	16	26672	6299.93	4.2337	0.0008341	***	0.67128	ASB17_1	ASB17	0.0329347
FP006878	16	320.708	74.2661	4.3184	0.0008344	***	0.763008	PRKAA1_1	PRKAA1	0.0329347
FP020401	23	1474.1	375.686	3.9238	0.0008408	***	0.659518	SCN4A_1	SCN4A	0.0330809
FP006233	21	870.752	217.679	4.0002	0.0008395	***	0.68601	MRPS18C_1	MRPS18C	0.0330809
FP003508	19	221.132	53.2096	4.1559	0.000845	***	0.731567	LYPD1_2	LYPD1	0.0331127
FP011498	15	3171.54	719.103	4.4104	0.0008497	***	0.786425	C9orf131_1	C9orf131	0.0331127
FP011132	15	213.898	48.4627	4.4137	0.0008449	***	0.786645	NDUFB9_1	NDUFB9	0.0331127
FP013505	14	103.424	22.0204	4.6967	0.0008458	***	0.829504	STIM1_1	STIM1	0.0331127
FP005584	12	205.656	41.9852	4.8983	0.0008496	***	0.852771	CAMK2N2_1	CAMK2N2	0.0331127
FP013790	6	5756.15	640.624	8.9852	0.0008492	***	0.965611	CD59_2	CD59	0.0331127
FP014390	20	336.576	83.324	4.0394	0.0008514	***	0.699817	XRRA1_1	XRRA1	0.0331244
FP011556	16	439.439	102.038	4.3066	0.0008527	***	0.766758	SLC25A51_1	SLC25A51	0.0331244
FP013553	16	153.281	35.5991	4.3058	0.0008541	***	0.766694	RRP8_1	RRP8	0.0331264
FP019496	27	315.064	82.2517	3.8305	0.0008562	***	0.725716	ALOX12B_1	ALOX12B	0.0331555
FP021017	20	263.157	64.4088	4.0857	0.000862	***	0.714564	CCDC68_1	CCDC68	0.0333214
FP021319	18	276.279	66.6481	4.1453	0.0008632	***	0.730704	EBI3_1	EBI3	0.0333214
FP003816	21	1985.7	498.25	3.9853	0.0008677	***	0.684661	STAT4_1	STAT4	0.0334425
FP006644	17	1404.47	333.868	4.2067	0.0008791	***	0.48935	AADAT_1	AADAT	0.0338288
FP001033	17	2261.14	537.995	4.2029	0.0008855	***	0.746903	C1orf141_1	C1orf141	0.0340218
FP005445	19	1194.91	289.416	4.1287	0.0008928	***	0.729331	CCNL1_1	CCNL1	0.0341156
FP013313	18	344.245	83.3768	4.1288	0.0008926	***	0.729339	BCCIP_1	BCCIP	0.0341156
FP019024	13	237.899	52.8054	4.5052	0.0008935	***	0.805312	HAS3_2	HAS3	0.0341156
FP012567	9	492.815	80.8822	6.093	0.0008896	***	0.838712	MTRNR2L7_1	MTRNR2L7	0.0341156
FP018872	21	519.216	130.877	3.9672	0.0009034	***	0.683001	CCL22_1	CCL22	0.0341372
FP018061	22	1761.29	443.74	3.9692	0.0008995	***	0.683183	IL16_5	IL16	0.0341372
FP019556	17	330.383	78.7184	4.197	0.0008957	***	0.746441	ELAC2_2	ELAC2	0.0341372
FP021991	26	272.806	71.125	3.8356	0.0008999	***	0.779934	ALKBH6_1	ALKBH6	0.0341372
FP005703	14	166.95	37.1143	4.4983	0.0009038	***	0.804875	CEP19_1	CEP19	0.0341372
FP021925	6	263.01	29.7069	8.8535	0.0008987	***	0.967994	PDCD2L_1	PDCD2L	0.0341372
FP000043	3	395.033	0.560542	704.73	0.0009033	***	0.999998	ATAD3B_1	ATAD3B	0.0341372
FP024170	21	73.9607	18.444	4.01	0.0009073	***	0.697208	MAFF_2	MAFF	0.0342168
FP012212	17	243.457	58.1399	4.1874	0.0009126	***	0.561941	SARDH_2	SARDH	0.0343112
FP024997	22	371.428	94.6534	3.9241	0.0009113	***	0.669066	TMSB15A_1	TMSB15A	0.0343112
FP021375	18	344.903	83.8404	4.1138	0.0009202	***	0.728097	GTF2F1_3	GTF2F1	0.0343341
FP015997	17	276.695	66.1017	4.1859	0.0009153	***	0.745563	FAM109A_1	FAM109A	0.0343341
FP019331	12	86.4078	18.6077	4.6437	0.0009169	***	0.826546	SHPK_1	SHPK	0.0343341
FP014260	10	811.178	147.797	5.4885	0.0009177	***	0.900799	CLCF1_2	CLCF1	0.0343341
FP000089	5	443.68	33.3752	13.2937	0.0009199	***	0.991619	ARHGEF16_2	ARHGEF16	0.0343341
FP018134	17	294.494	70.4267	4.1816	0.0009231	***	0.745219	AP3S2_1	AP3S2	0.0343379
FP021571	15	1642.73	376.458	4.3636	0.0009224	***	0.783211	ZNF433_1	ZNF433	0.0343379
FP020882	21	386.694	97.7848	3.9545	0.0009293	***	0.681834	AQP4_2	AQP4	0.034401
FP014177	18	383.082	91.702	4.1775	0.0009304	***	0.746012	MAP3K11_3	MAP3K11	0.034401
FP003050	90	298.875	86.9966	3.4355	0.0009355	***	0.419382	MEIS1_1	MEIS1	0.0344375
FP005491	63	205.893	58.8617	3.4979	0.0009364	***	0.562602	MECOM_4	MECOM	0.0344375
FP012520	21	409.045	103.551	3.9502	0.0009384	***	0.618345	LYZL1_1	LYZL1	0.0344375
FP007567	22	11501.2	2940.42	3.9114	0.000938	***	0.667872	SPINK9_1	SPINK9	0.0344375
FP021236	14	100.406	22.4311	4.4762	0.0009373	***	0.803478	MOB3A_1	MOB3A	0.0344375
FP024801	17	134.404	32.2374	4.1692	0.0009455	***	0.744237	FAM104B_1	FAM104B	0.0346462
FP022232	21	293.194	74.3278	3.9446	0.0009501	***	0.600751	TEX101_1	TEX101	0.0347034
FP002991	18	18445.6	4427.58	4.1661	0.0009513	***	0.743986	CCDC88A_2	CCDC88A	0.0347034
FP012078	9	144.23	23.9702	6.017	0.0009503	***	0.926194	PTGES2_1	PTGES2	0.0347034
FP007805	19	1182.76	288.903	4.094	0.0009579	***	0.72644	F12_1	F12	0.0348923
FP008756	16	167.498	39.4996	4.2405	0.0009641	***	0.761839	LYRM2_1	LYRM2	0.0350142
FP022762	15	163.963	37.7859	4.3393	0.0009629	***	0.78151	NLRP5_1	NLRP5	0.0350142
FP001602	30	252.357	67.1615	3.7575	0.0009702	***	0.547627	KPRP_1	KPRP	0.035079
FP011991	17	9153.09	2202.36	4.156	0.0009701	***	0.743185	RC3H2_2	RC3H2	0.035079
FP013316	16	161.775	38.1877	4.2363	0.0009716	***	0.761523	DHX32_1	DHX32	0.035079
FP009845	13	247.928	55.6561	4.4546	0.0009712	***	0.802101	PTCD1_1	PTCD1	0.035079
FP017093	15	2123.35	490.488	4.3291	0.0009803	***	0.287175	SRSF5_1	SRSF5	0.0351742
FP011570	16	268.889	63.5388	4.2319	0.0009796	***	0.761189	CNTNAP3B_1	CNTNAP3B	0.0351742
FP011834	15	349.634	78.5991	4.4483	0.0009814	***	0.801694	NIPSNAP3B_1	NIPSNAP3B	0.0351742
FP005145	20	148.423	37.3894	3.9697	0.0009902	***	0.693575	PARP9_2	PARP9	0.0354379
FP012358	16	12269.8	2903.86	4.2253	0.0009917	***	0.760692	AKR1C2_2	AKR1C2	0.0354399
FP004642	17	405.254	97.8222	4.1428	0.0009955	***	0.74212	MAP4_1	MAP4	0.035524
FP015822	20	2543.92	641.399	3.9662	0.0009977	***	0.693262	CRADD_1	CRADD	0.0355508
FP024316	20	147.995	37.3309	3.9644	0.001002	**	0.6931	KIAA0930_3	KIAA0930	0.0355848
FP000284	19	417.4	105.277	3.9648	0.001001	**	0.693132	CROCC_2	CROCC	0.0355848
FP023506	16	210.674	49.9332	4.2191	0.001003	**	0.760222	C20orf195_1	C20orf195	0.0355848
FP007051	24	1317.45	342.552	3.846	0.001008	**	0.652034	ARHGEF28_2	ARHGEF28	0.0357105
FP001471	18	307.489	75.6354	4.0654	0.001015	**	0.724035	GJA5_2	GJA5	0.0358071
FP017810	14	67.0769	14.6593	4.5757	0.001017	**	0.822657	DAPK2_1	DAPK2	0.0358226
FP007121	20	3366.24	850.823	3.9564	0.001019	**	0.751432	XRCC4_1	XRCC4	0.0358416
FP022675	14	7417.32	1676.51	4.4243	0.001021	**	0.800137	LILRB5_1	LILRB5	0.0358606
FP021211	16	78.6173	18.7035	4.2033	0.001033	**	0.759018	C19orf25_1	C19orf25	0.0362303
FP007922	16	116.679	27.776	4.2007	0.001038	**	0.758816	C6orf201_1	C6orf201	0.0363537
FP001789	26	217.916	57.7324	3.7746	0.001043	**	0.626947	ISG20L2_2	ISG20L2	0.0363731
FP021563	21	289.091	74.0672	3.9031	0.001042	**	0.677043	ZNF441_1	ZNF441	0.0363731
FP021864	20	837.865	212.344	3.9458	0.001043	**	0.691401	ZNF43_2	ZNF43	0.0363731
FP009572	17	4616.5	1121.69	4.1157	0.00105	**	0.739927	SUN3_1	SUN3	0.0365653
FP014058	23	153.305	39.7168	3.8599	0.001055	**	0.66296	C11orf48_1	C11orf48	0.0366184
FP022406	16	289.736	69.1263	4.1914	0.001056	**	0.758101	PLA2G4C_1	PLA2G4C	0.0366184
FP016411	12	201.837	42.5541	4.7431	0.001054	**	0.845137	SLC25A30_1	SLC25A30	0.0366184
FP005205	15	331.463	79.1134	4.1897	0.00106	**	0.757971	MGLL_3	MGLL	0.0367053
FP002782	19	92.9057	23.3167	3.9845	0.001066	**	0.705734	PREB_1	PREB	0.0367575
FP017734	14	1599.54	363.665	4.3984	0.001066	**	0.798443	ARPP19_2	ARPP19	0.0367575
FP011460	19	144.791	35.8446	4.0394	0.00107	**	0.721821	AQP3_1	AQP3	0.0368437
FP007990	12	304.288	67.0588	4.5376	0.001079	**	0.820425	DTNBP1_1	DTNBP1	0.0371016
FP017625	19	1415.81	355.987	3.9771	0.001083	**	0.705077	LCMT2_1	LCMT2	0.0371351
FP008109	18	1930.32	478.526	4.0339	0.001082	**	0.721348	HIST1H3I_1	HIST1H3I	0.0371351
FP003774	23	102.519	26.652	3.8466	0.001088	**	0.661672	DNAJC10_1	DNAJC10	0.0372545
FP017770	22	113.961	29.3663	3.8807	0.001096	**	0.674929	ALDH1A2_2	ALDH1A2	0.0373366
FP021185	17	348.854	85.2446	4.0924	0.001098	**	0.691586	ABCA7_2	ABCA7	0.0373366
FP007335	21	134.296	33.8191	3.971	0.001097	**	0.70453	AFF4_1	AFF4	0.0373366
FP004458	15	224.497	52.6166	4.2667	0.001095	**	0.776342	CMTM7_1	CMTM7	0.0373366
FP017430	7	205.893	30.5585	6.7377	0.001092	**	0.949098	BRF1_2	BRF1	0.0373366
FP011348	21	511.369	131.999	3.874	0.001112	**	0.674301	RANBP6_1	RANBP6	0.0377603
FP009332	39	368.301	103.42	3.5612	0.001116	**	0.672429	ETV1_1	ETV1	0.0377734
FP003198	26	192.4	50.9947	3.7729	0.001117	**	0.727546	MAT2A_3	MAT2A	0.0377734
FP019780	21	3469.68	896.774	3.8691	0.001124	**	0.673828	CCL1_1	CCL1	0.0377785
FP013755	20	20121	5147.09	3.9092	0.001129	**	0.688032	FSHB_2	FSHB	0.0377785
FP012641	20	1496.56	382.738	3.9101	0.001127	**	0.688119	CHAT_1	CHAT	0.0377785
FP020485	13	203.622	46.6039	4.3692	0.001119	**	0.691096	KIF19_1	KIF19	0.0377785
FP005299	18	123.829	30.8633	4.0122	0.001131	**	0.719477	SLC35G2_1	SLC35G2	0.0377785
FP025201	18	106.16	26.446	4.0142	0.001126	**	0.719654	IGSF1_1	IGSF1	0.0377785
FP021383	17	209.412	51.3593	4.0774	0.001131	**	0.73679	DENND1C_1	DENND1C	0.0377785
FP007830	17	212.929	51.202	4.1586	0.001123	**	0.75556	ZNF354B_1	ZNF354B	0.0377785
FP004041	15	62.2112	14.6293	4.2525	0.001122	**	0.775315	ZFAND2B_1	ZFAND2B	0.0377785
FP012355	15	99.6917	23.4744	4.2468	0.001134	**	0.774902	PITRM1_1	PITRM1	0.0378092
FP021137	8	110.703	19.0327	5.8165	0.001135	**	0.92161	PQLC1_1	PQLC1	0.0378092
FP000572	21	111.6	28.585	3.9042	0.001141	**	0.687565	TMEM234_1	TMEM234	0.0379576
FP005464	38	203.781	57.2323	3.5606	0.001148	**	0.66287	C3orf80_1	C3orf80	0.0381388
FP000746	21	671.321	172.178	3.899	0.001154	**	0.687084	PPIH_1	PPIH	0.0381647
FP003240	20	1565.45	396.505	3.9481	0.001151	**	0.702477	FABP1_1	FABP1	0.0381647
FP000336	15	141.129	33.3053	4.2374	0.001153	**	0.774216	UBXN10_1	UBXN10	0.0381647
FP025424	11	128.901	27.553	4.6784	0.001155	**	0.871647	SLC10A3_1	SLC10A3	0.0381647
FP000082	12	151.508	33.7377	4.4908	0.00116	**	0.817625	FAM213B_1	FAM213B	0.0382784
FP009303	20	309.452	78.4674	3.9437	0.001162	**	0.702078	RSPH10B2_1	RSPH10B2	0.038293
FP011934	20	5358.28	1375.93	3.8943	0.001166	**	0.686647	DFNB31_2	DFNB31	0.0383219
FP005565	20	5115.22	1297.59	3.9421	0.001166	**	0.701932	KLHL24_2	KLHL24	0.0383219
FP000710	9	288.255	49.8495	5.7825	0.00117	**	0.920793	COL9A2_1	COL9A2	0.0383507
FP009282	14	303.723	67.7681	4.4818	0.001176	**	0.817084	FSCN1_1	FSCN1	0.038496
FP006989	22	5845.12	1521.33	3.8421	0.001194	**	0.613333	NLN_2	NLN	0.0388778
FP000995	27	179.568	48.5821	3.6962	0.001192	**	0.649745	ALG6_1	ALG6	0.0388778
FP006379	20	558.949	143.937	3.8833	0.001194	**	0.685619	RPL34_1	RPL34	0.0388778
FP009716	14	182.159	43.1883	4.2178	0.001194	**	0.739409	GNAI1_1	GNAI1	0.0388778
FP010637	16	2216.58	537.382	4.1248	0.001196	**	0.752905	EXTL3_1	EXTL3	0.0388914
FP001287	17	195.434	48.2781	4.0481	0.001198	**	0.734354	GSTM2_1	GSTM2	0.0389049
FP019653	19	1174.6	299.008	3.9283	0.0012	**	0.459621	SLC47A2_1	SLC47A2	0.0389184
FP003546	16	254.986	61.9104	4.1186	0.00121	**	0.665315	KIF5C_1	KIF5C	0.0389341
FP002769	16	898.533	218.059	4.1206	0.001206	**	0.752574	CENPA_1	CENPA	0.0389341
FP001726	15	6988.59	1659.85	4.2104	0.001209	**	0.772224	PKLR_1	PKLR	0.0389341
FP011212	12	93.1723	20.0465	4.6478	0.001206	**	0.840181	TOP1MT_1	TOP1MT	0.0389341
FP005513	26	323.876	87.7953	3.689	0.001214	**	0.68207	PLD1_1	PLD1	0.0390117
FP014770	14	3049.67	724.829	4.2074	0.001216	**	0.772006	OR8D4_1	OR8D4	0.0390249
FP002445	16	254.383	61.8239	4.1146	0.001219	**	0.752103	ZNF678_1	ZNF678	0.0390701
FP008453	19	367.768	92.8675	3.9601	0.001257	**	0.216289	TREML2_1	TREML2	0.0390724
FP017551	23	298.048	78.6236	3.7908	0.001235	**	0.417998	C15orf52_1	C15orf52	0.0390724
FP006407	40	356.984	101.296	3.5242	0.001269	**	0.572098	ANK2_1	ANK2	0.0390724
FP023607	21	10392.7	2722.64	3.8171	0.001262	**	0.668845	TIAM1_2	TIAM1	0.0390724
FP022244	21	1018.75	266.296	3.8256	0.001239	**	0.669667	ZNF576_2	ZNF576	0.0390724
FP015827	22	5483.42	1432.23	3.8286	0.00123	**	0.669952	TMCC3_2	TMCC3	0.0390724
FP013642	20	2704.72	698.949	3.8697	0.00123	**	0.684344	MICALCL_1	MICALCL	0.0390724
FP004161	19	228.536	58.3655	3.9156	0.001233	**	0.699527	ATG16L1_1	ATG16L1	0.0390724
FP019853	18	156.211	39.8925	3.9158	0.001232	**	0.699546	TBC1D3F_3	TBC1D3F	0.0390724
FP009598	18	316.23	79.813	3.9621	0.001252	**	0.715107	VOPP1_2	VOPP1	0.0390724
FP020346	17	6125.7	1523.43	4.021	0.001263	**	0.732078	USP32_2	USP32	0.0390724
FP019940	18	366.797	91.0692	4.0277	0.001247	**	0.732642	KRT26_1	KRT26	0.0390724
FP014181	18	2843.83	705.979	4.0282	0.001245	**	0.732686	PCNXL3_2	PCNXL3	0.0390724
FP012797	17	1048.58	260.217	4.0296	0.001242	**	0.732807	P4HA1_2	P4HA1	0.0390724
FP010721	17	281.942	68.8838	4.093	0.00127	**	0.750377	SFRP1_1	SFRP1	0.0390724
FP020228	17	289.185	70.5945	4.0964	0.001262	**	0.75065	SPOP_2	SPOP	0.0390724
FP002251	16	356.773	87.0213	4.0998	0.001254	**	0.750923	RBBP5_2	RBBP5	0.0390724
FP017330	16	628.153	153.183	4.1007	0.001252	**	0.750991	GSKIP_1	GSKIP	0.0390724
FP013001	17	413.827	100.881	4.1021	0.001248	**	0.751106	PIK3AP1_2	PIK3AP1	0.0390724
FP015291	16	307.345	74.886	4.1042	0.001243	**	0.75127	RAPGEF3_5	RAPGEF3	0.0390724
FP009630	16	67.1405	16.3305	4.1114	0.001227	**	0.751842	SBDS_1	SBDS	0.0390724
FP022503	16	10787.7	2623.39	4.1121	0.001225	**	0.751901	CPT1C_2	CPT1C	0.0390724
FP001217	16	157.388	37.5839	4.1876	0.001259	**	0.770534	HIAT1_1	HIAT1	0.0390724
FP009164	15	127.327	29.655	4.2936	0.001269	**	0.791389	SLC22A3_1	SLC22A3	0.0390724
FP025336	14	183.382	42.6914	4.2955	0.001265	**	0.791521	MAGEA4_1	MAGEA4	0.0390724
FP013792	14	200.524	46.4944	4.3129	0.001229	**	0.79271	FBXO3_2	FBXO3	0.0390724
FP009200	12	462.957	104.026	4.4504	0.001234	**	0.815167	WDR27_1	WDR27	0.0390724
FP019014	13	189.042	40.9092	4.621	0.001253	**	0.838746	SLC7A6_1	SLC7A6	0.0390724
FP008191	6	524.223	64.2136	8.1637	0.001226	**	0.961619	GTF2H4_2	GTF2H4	0.0390724
FP006822	18	176.671	43.9819	4.0169	0.001273	**	0.731733	SLC45A2_1	SLC45A2	0.0391157
FP022194	23	226.988	60.142	3.7742	0.001283	**	0.654582	RPS19_2	RPS19	0.0391719
FP009555	21	1287.71	337.969	3.8101	0.001282	**	0.668167	MYO1G_1	MYO1G	0.0391719
FP015497	19	9705.78	2490.45	3.8972	0.001281	**	0.697843	SMUG1_1	SMUG1	0.0391719
FP010785	18	356.49	88.8621	4.0117	0.001286	**	0.731293	TMEM68_2	TMEM68	0.0391719
FP018177	17	383.633	95.6247	4.0119	0.001286	**	0.731306	SPATA8_1	SPATA8	0.0391719
FP002633	17	2086.62	519.791	4.0143	0.00128	**	0.731517	RSAD2_1	RSAD2	0.0391719
FP022256	12	16516.9	3733.14	4.4244	0.001285	**	0.813561	ZNF404_1	ZNF404	0.0391719
FP021435	17	602.736	150.28	4.0108	0.001289	**	0.731213	TIMM44_1	TIMM44	0.0392147
FP011598	19	132.768	34.1073	3.8927	0.001294	**	0.697426	SMC5_1	SMC5	0.0392332
FP024115	16	129.626	31.7448	4.0834	0.001293	**	0.749603	FOXRED2_2	FOXRED2	0.0392332
FP005806	15	127.715	30.6171	4.1714	0.001296	**	0.769312	GRK4_1	GRK4	0.0392332
FP003263	16	3664.73	878.448	4.1718	0.001295	**	0.769346	STARD7_2	STARD7	0.0392332
FP021011	22	3118.6	827.784	3.7674	0.001303	**	0.653909	STARD6_1	STARD6	0.0392997
FP016395	22	238.758	63.3708	3.7676	0.001302	**	0.653932	ENOX1_2	ENOX1	0.0392997
FP007803	17	340.981	85.1121	4.0063	0.0013	**	0.73083	SLC34A1_1	SLC34A1	0.0392997
FP013688	20	80.8482	20.7913	3.8886	0.001305	**	0.697048	SERGEF_1	SERGEF	0.0393117
FP024580	17	297.493	74.3519	4.0012	0.001313	**	0.730395	DCAF8L1_1	DCAF8L1	0.0393595
FP012293	16	85.0748	20.8758	4.0753	0.001313	**	0.748951	DPP7_1	DPP7	0.0393595
FP021933	13	219.09	49.6585	4.4119	0.00131	**	0.812783	ZNF30_1	ZNF30	0.0393595
FP011985	18	260.988	66.3013	3.9364	0.00132	**	0.712825	PTGS1_3	PTGS1	0.0395211
FP001248	20	408.667	106.637	3.8323	0.001334	**	0.680807	NBPF4_1	NBPF4	0.0396982
FP023897	20	3271.92	853.604	3.8331	0.001332	**	0.680877	AIFM3_2	AIFM3	0.0396982
FP004249	11	203.419	42.2696	4.8124	0.001334	**	0.687467	SEPT2_2	42980	0.0396982
FP022071	16	505.382	126.566	3.993	0.001334	**	0.729702	LGALS7_1	LGALS7	0.0396982
FP003102	16	155.568	37.4306	4.1562	0.001332	**	0.768164	ZNF638_2	ZNF638	0.0396982
FP013016	24	120.6	32.4074	3.7214	0.001348	**	0.639637	EXOSC1_1	EXOSC1	0.0399695
FP002404	17	200.614	49.3961	4.0613	0.001347	**	0.747823	CAPN2_2	CAPN2	0.0399695
FP014682	18	1050.29	267.582	3.9251	0.00135	**	0.646374	FXYD6_1	FXYD6	0.0399805
FP005789	17	135.806	34.085	3.9844	0.001357	**	0.72896	RNF4_2	RNF4	0.0401394
FP014776	15	97.0683	23.9386	4.0549	0.001364	**	0.7473	SPA17_1	SPA17	0.0402979
FP013924	11	362.619	79.5547	4.5581	0.00137	**	0.835312	FOLH1_1	FOLH1	0.0404265
FP013432	17	375.642	94.4259	3.9782	0.001374	**	0.728429	TSPAN4_4	TSPAN4	0.0404959
FP002624	18	132.172	33.7778	3.913	0.001384	**	0.710731	RNASEH1_1	RNASEH1	0.0407417
FP004677	18	294.528	74.2358	3.9675	0.001403	**	0.727507	P4HTM_1	P4HTM	0.0412516
FP019692	21	276.292	73.319	3.7684	0.001407	**	0.66408	SARM1_2	SARM1	0.0412703
FP019221	16	296.331	73.3805	4.0383	0.001407	**	0.745943	SLC22A31_1	SLC22A31	0.0412703
FP008176	16	87.196	21.597	4.0374	0.001409	**	0.745873	NRM_1	NRM	0.0412797
FP003784	20	708.537	183.991	3.8509	0.001413	**	0.693557	ZSWIM2_1	ZSWIM2	0.0413475
FP009400	22	965.5	258.856	3.7299	0.00142	**	0.701754	SNX10_3	SNX10	0.0414043
FP006611	17	471.479	119.021	3.9613	0.00142	**	0.726976	TKTL2_1	TKTL2	0.0414043
FP000061	8	97.9037	17.5788	5.5694	0.00142	**	0.915379	NADK_3	NADK	0.0414043
FP019691	14	140.505	32.2319	4.3592	0.001423	**	0.448856	SARM1_1	SARM1	0.0414117
FP001222	6	444.72	56.7021	7.8431	0.001427	**	0.950666	RTCA_1	RTCA	0.0414117
FP007062	6	11901.1	1517.4	7.8431	0.001427	**	0.950666	FAM169A_1	FAM169A	0.0414117
FP022884	6	739.903	94.3382	7.8431	0.001427	**	0.950666	NSFL1C_1	NSFL1C	0.0414117
FP025265	95	1173.12	355.817	3.297	0.001434	**	0.252591	ARHGEF6_1	ARHGEF6	0.0414536
FP016657	20	320.87	84.4704	3.7986	0.0014352	**	0.677574	UPF3A_2	UPF3A	0.0414536
FP018801	20	1367.43	355.702	3.8443	0.001432	**	0.692936	ADCY7_2	ADCY7	0.0414536
FP008725	14	114.796	27.8897	4.1161	0.001431	**	0.765101	NT5E_1	NT5E	0.0414536
FP016714	33	143.853	40.8454	3.5219	0.001439	**	0.640126	RAB2B_2	RAB2B	0.0414658
FP018097	17	175.839	44.4598	3.955	0.001438	**	0.72643	PDE8A_1	PDE8A	0.0414658
FP002889	17	609.457	154.142	3.9539	0.001441	**	0.72633	MORN2_1	MORN2	0.0414748
FP022248	18	345.71	87.459	3.9528	0.001444	**	0.726238	PLAUR_1	PLAUR	0.0414955
FP002337	21	15672.2	4130.3	3.7945	0.001448	**	0.677172	PPP2R5A_2	PPP2R5A	0.0415302
FP010397	13	3000.35	690.412	4.3457	0.001453	**	0.808582	ESYT2_4	ESYT2	0.041625
FP025298	40	380.564	109.88	3.4634	0.00146	**	0.623678	SLITRK4_1	SLITRK4	0.0417281
FP005682	14	156.306	37.1225	4.2106	0.001459	**	0.785563	XXYLT1_1	XXYLT1	0.0417281
FP020600	16	1299.94	323.642	4.0166	0.001466	**	0.744158	SEPT9_10	42987	0.0418023
FP019236	15	2230.93	543.751	4.1028	0.001465	**	0.764079	VPS9D1_2	VPS9D1	0.0418023
FP016575	26	430.263	118.445	3.6326	0.001471	**	0.711765	ZIC5_1	ZIC5	0.0418962
FP016861	16	139.269	34.711	4.0122	0.001478	**	0.743797	FAM177A1_1	FAM177A1	0.0419011
FP018261	16	160.23	39.9352	4.0122	0.001478	**	0.743798	GNG13_1	GNG13	0.0419011
FP014214	16	129.494	31.5985	4.0981	0.001477	**	0.76371	KLC2_2	KLC2	0.0419011
FP012912	31	115.753	32.7291	3.5367	0.001486	**	0.678329	PTEN_1	PTEN	0.0419342
FP013846	17	89.3944	22.6965	3.9387	0.001484	**	0.725008	KAI1_1	KAI1	0.0419342
FP004342	15	509.111	124.332	4.0948	0.001486	**	0.763452	TAMM41_1	TAMM41	0.0419342
FP023057	15	137.167	33.495	4.0952	0.001485	**	0.763483	GZF1_1	GZF1	0.0419342
FP012412	17	275.495	69.9964	3.9358	0.001493	**	0.72476	MCM10_1	MCM10	0.0420834
FP007439	20	165.776	43.8759	3.7783	0.0015	**	0.675607	EIF4EBP3_1	EIF4EBP3	0.0422322
FP017802	14	133.58	32.679	4.0876	0.001505	**	0.762896	TPM1_2	TPM1	0.0423119
FP022641	12	260.709	60.3185	4.3222	0.001508	**	0.807059	ZNF331_3	ZNF331	0.0423119
FP020958	15	151.457	37.0795	4.0847	0.001513	**	0.762664	PSTPIP2_1	PSTPIP2	0.0424037
FP004255	12	150.417	34.8803	4.3124	0.001531	**	0.84974	THAP4_1	THAP4	0.0427618
FP014729	36	129.712	37.4497	3.4636	0.001536	**	0.538026	ABCG4_2	ABCG4	0.0427698
FP024699	19	2331.57	611.952	3.8101	0.00154	**	0.689706	PQBP1_2	PQBP1	0.0427698
FP007120	19	1217.29	319.361	3.8117	0.001535	**	0.689858	TMEM167A_1	TMEM167A	0.0427698
FP019371	19	271.085	70.2119	3.861	0.001539	**	0.706006	GP1BA_1	GP1BA	0.0427698
FP013555	16	150.869	37.8075	3.9904	0.00154	**	0.741985	ILK_2	ILK	0.0427698
FP021324	12	163.412	36.5118	4.4756	0.001542	**	0.830654	MPND_1	MPND	0.042777
FP021019	59	214.112	64.1439	3.338	0.001549	**	0.309618	TCF4_11	TCF4	0.0428743
FP015757	17	150.004	38.2931	3.9173	0.001548	**	0.72313	CSRP2_1	CSRP2	0.0428743
FP005027	24	236.444	65.0797	3.6331	0.001556	**	0.611144	DZIP3_1	DZIP3	0.0428886
FP014889	19	65.5178	16.9948	3.8552	0.001557	**	0.705476	CACNA1C_1	CACNA1C	0.0428886
FP000277	18	5488.81	1423.68	3.8554	0.001557	**	0.705493	SZRD1_1	SZRD1	0.0428886
FP014938	16	289.423	72.6568	3.9834	0.00156	**	0.741398	VAMP1_1	VAMP1	0.0428886
FP005220	17	552.522	141.187	3.9134	0.00156	**	0.806674	ACAD9_1	ACAD9	0.0428886
FP020743	9	152.489	27.9015	5.4653	0.001565	**	0.866916	COLEC12_1	COLEC12	0.042978
FP009323	17	239.9	60.2652	3.9807	0.001568	**	0.741171	SCIN_2	SCIN	0.0430123
FP018341	16	376.996	94.725	3.9799	0.00157	**	0.741103	RNPS1_1	RNPS1	0.0430191
FP015261	20	139.672	36.2755	3.8503	0.001573	**	0.718579	PRICKLE1_2	PRICKLE1	0.0430326
FP010232	20	225.578	60.0585	3.756	0.001574	**	0.803856	MRPS33_1	MRPS33	0.0430326
FP024688	27	280.05	78.238	3.5795	0.001588	**	0.445011	WDR13_2	WDR13	0.0431815
FP017817	31	335.959	95.293	3.5255	0.00159	**	0.703836	KIAA0101_1	KIAA0101	0.0431815
FP022799	18	150.488	39.1238	3.8464	0.001585	**	0.704673	ZNF550_1	ZNF550	0.0431815
FP004420	18	830.927	212.77	3.9053	0.001585	**	0.722072	UBE2E1_2	UBE2E1	0.0431815
FP013303	17	259.778	66.5027	3.9063	0.001582	**	0.72216	CTBP2_4	CTBP2	0.0431815
FP015370	16	280.323	69.0934	4.0572	0.00159	**	0.760502	FAM186A_1	FAM186A	0.0431815
FP008983	21	46313.8	12474.7	3.7126	0.001593	**	0.658536	ALDH8A1_1	ALDH8A1	0.0431946
FP013280	12	733.516	164.729	4.4529	0.001594	**	0.829339	HTRA1_1	HTRA1	0.0431946
FP006447	17	331.803	83.5923	3.9693	0.001602	**	0.74021	KIAA1109_1	KIAA1109	0.0433158
FP021657	20	711.086	187.602	3.7904	0.001605	**	0.687832	PKN1_1	PKN1	0.0433285
FP007895	15	4969.24	1252.28	3.9682	0.001606	**	0.740114	GMDS_2	GMDS	0.0433285
FP015669	19	5364.8	1415.68	3.7895	0.001608	**	0.742962	MON2_3	MON2	0.0433348
FP024559	104	596.321	183.607	3.2478	0.001618	**	0.230203	PHEX_1	PHEX	0.0435565
FP012405	16	257.172	64.9003	3.9626	0.001623	**	0.739642	DHTKD1_1	DHTKD1	0.0435955
FP018456	14	211.466	50.9817	4.1479	0.001622	**	0.781023	CARHSP1_1	CARHSP1	0.0435955
FP003945	16	722.098	182.315	3.9607	0.001628	**	0.739486	PLEKHM3_1	PLEKHM3	0.0436135
FP011929	14	330.377	79.6824	4.1462	0.001627	**	0.780898	AKNA_4	AKNA	0.0436135
FP010881	6	14161.5	1869.8	7.5738	0.001629	**	0.918758	RP11-758M4.1_1	RP11-758M4.1	0.0436135
FP012906	21	6999.13	1891.22	3.7008	0.001636	**	0.657351	MINPP1_2	MINPP1	0.0437532
FP001469	26	6791.75	1904.89	3.5654	0.001643	**	0.59937	BCL9_2	BCL9	0.0438926
FP014360	15	117.102	29.0042	4.0374	0.001647	**	0.758934	P2RY6_1	P2RY6	0.0439516
FP001289	16	326.086	82.4991	3.9526	0.001653	**	0.738798	GSTM5_1	GSTM5	0.0440161
FP015383	15	268.389	64.875	4.137	0.001652	**	0.780224	CSRNP2_1	CSRNP2	0.0440161
FP011119	18	132.797	34.7278	3.824	0.00166	**	0.636583	ZHX1-C8ORF76_1	ZHX1-C8ORF76	0.0440301
FP005100	15	126.194	31.2782	4.0346	0.001656	**	0.758707	B4GALT4_1	B4GALT4	0.0440301
FP010562	16	258.172	65.3848	3.9485	0.001666	**	0.738449	PDLIM2_1	PDLIM2	0.0441098
FP024733	18	406.423	106.368	3.8209	0.00167	**	0.702304	GAGE12H_1	GAGE12H	0.0441337
FP004355	18	183.045	47.2102	3.8772	0.001675	**	0.719576	CAND2_1	CAND2	0.0442182
FP019195	7	300.69	40.0163	7.5142	0.001679	**	0.966356	BANP_1	BANP	0.0442762
FP000609	18	167.764	43.2872	3.8756	0.001681	**	0.71943	PHC2_1	PHC2	0.0442814
FP015677	31	257.125	73.778	3.4851	0.001697	**	0.528833	SRGAP1_1	SRGAP1	0.044538
FP022785	19	2789.82	741.243	3.7637	0.001698	**	0.685268	ZNF460_1	ZNF460	0.044538
FP018361	19	234.931	62.411	3.7643	0.001696	**	0.685322	PRSS22_1	PRSS22	0.044538
FP010923	12	266.96	60.5416	4.4095	0.001697	**	0.826794	CA13_1	CA13	0.044538
FP007286	35	174.397	50.4409	3.4575	0.001704	**	0.63494	MEGF10_1	MEGF10	0.0445788
FP025430	20	233.687	62.8176	3.7201	0.001702	**	0.660808	IKBKG_3	IKBKG	0.0445788
FP010901	19	149.349	39.7027	3.7617	0.001705	**	0.685074	TPD52_1	TPD52	0.0445788
FP002712	10	21778.5	4425.71	4.9209	0.001712	**	0.880767	PUM2_2	PUM2	0.0447142
FP006320	17	3580.45	940.47	3.8071	0.001718	**	0.597062	ADH1C_1	ADH1C	0.0448232
FP013577	18	153.245	39.6772	3.8623	0.001725	**	0.718234	NLRP10_1	NLRP10	0.044958
FP006773	20	222.957	60.0697	3.7116	0.001733	**	0.669049	CCT5_2	CCT5	0.0450709
FP019118	18	391.899	103.075	3.8021	0.001736	**	0.700544	TMEM231_1	TMEM231	0.0451011
FP000770	20	141.479	38.1386	3.7096	0.001741	**	0.668846	CDC20_1	CDC20	0.0451355
FP008184	14	360.192	87.7109	4.1066	0.00174	**	0.777963	DDR1_2	DDR1	0.0451355
FP025080	63	116.553	35.513	3.282	0.001749	**	0.683576	CHRDL1_2	CHRDL1	0.045295
FP010193	32	418.072	120.888	3.4584	0.001756	**	0.527848	PTN_1	PTN	0.0454284
FP003147	21	126.998	34.6314	3.6671	0.001763	**	0.65393	LBX2_1	LBX2	0.0454953
FP015694	17	354.704	90.5411	3.9176	0.001766	**	0.735804	IRAK3_1	IRAK3	0.0454953
FP016438	16	3239.1	826.721	3.918	0.001765	**	0.73584	LPAR6_1	LPAR6	0.0454953
FP016012	16	2641.96	674.201	3.9187	0.001763	**	0.735895	NAA25_1	NAA25	0.0454953
FP014646	51	106.171	31.9188	3.3263	0.001783	**	0.63532	ZBTB16_2	ZBTB16	0.0455801
FP021487	20	154.238	41.7024	3.6985	0.001783	**	0.667743	P2RY11_1	P2RY11	0.0455801
FP003389	18	196.224	51.7943	3.7885	0.001785	**	0.699271	ANAPC1_1	ANAPC1	0.0455801
FP019786	18	1195.53	310.909	3.8453	0.001784	**	0.716698	RFFL_5	RFFL	0.0455801
FP009108	17	338.955	88.1232	3.8464	0.00178	**	0.716798	SYNE1_2	SYNE1	0.0455801
FP019674	16	1692.63	432.694	3.9118	0.001786	**	0.735308	KCNJ12_2	KCNJ12	0.0455801
FP015596	16	274.504	68.7343	3.9937	0.001782	**	0.755418	NACA_2	NACA	0.0455801
FP013216	26	401.094	112.174	3.5757	0.001783	**	0.792811	ABLIM1_3	ABLIM1	0.0455801
FP017669	21	385.463	104.254	3.6973	0.001788	**	0.667622	SHF_1	SHF	0.0455838
FP007238	32	154.218	44.6968	3.4503	0.001793	**	0.699728	AP3S1_1	AP3S1	0.045642
FP004881	15	1426.45	357.529	3.9898	0.001794	**	0.755098	SYNPR_1	SYNPR	0.045642
FP015109	21	337.511	91.3402	3.6951	0.001797	**	0.667397	H2AFJ_1	H2AFJ	0.045671
FP001626	18	3376.81	892.488	3.7836	0.001803	**	0.698803	S100A9_1	S100A9	0.0457761
FP013378	11	204.554	44.6934	4.5768	0.00181	**	0.789341	RIC_1	RIC	0.0459063
FP008104	17	522.906	136.276	3.8371	0.001813	**	0.715955	HIST1H4K_1	HIST1H4K	0.0459349
FP009673	14	170.577	41.804	4.0804	0.001819	**	0.775993	GTF2IRD2_1	GTF2IRD2	0.0459447
FP009676	14	170.577	41.804	4.0804	0.001819	**	0.775993	GTF2IRD2B_1	GTF2IRD2B	0.0459447
FP015475	11	771.5	168.693	4.5734	0.001818	**	0.850492	PCBP2_1	PCBP2	0.0459447
FP016305	17	6178.31	1584.37	3.8995	0.001828	**	0.734243	FLT1_2	FLT1	0.0459828
FP004352	17	377.797	96.8602	3.9004	0.001825	**	0.73432	RAF1_1	RAF1	0.0459828
FP004204	15	273.373	68.6978	3.9793	0.001828	**	0.759818	ESPNL_3	ESPNL	0.0459828
FP023010	14	376.872	89.7064	4.2012	0.001825	**	0.798959	BFSP1_3	BFSP1	0.0459828
FP014525	26	349.99	98.8221	3.5416	0.001832	**	0.678948	FAM76B_1	FAM76B	0.0460363
FP016350	15	1115.63	286.461	3.8945	0.001845	**	0.733809	SPG20_2	SPG20	0.0463155
FP020411	17	79.0041	20.6459	3.8266	0.001851	**	0.715001	DDX5_1	DDX5	0.0464187
FP020544	26	601.402	170.041	3.5368	0.001853	**	0.701021	RECQL5_1	RECQL5	0.0464214
FP003865	21	141.345	38.4262	3.6784	0.001863	**	0.454784	BZW1_2	BZW1	0.0464928
FP023340	19	786.162	211.275	3.721	0.001858	**	0.511435	ZNF334_1	ZNF334	0.0464928
FP013752	24	989.959	278.377	3.5562	0.001867	**	0.665584	METTL15_1	METTL15	0.0464928
FP016489	19	271.613	73.0318	3.7191	0.001866	**	0.680925	PCDH20_1	PCDH20	0.0464928
FP015899	18	216.475	56.6503	3.8212	0.001871	**	0.714508	GLT8D2_1	GLT8D2	0.0464928
FP011466	17	3672.93	961.145	3.8214	0.00187	**	0.714524	UBAP2_3	UBAP2	0.0464928
FP019819	14	2267.74	571.731	3.9665	0.001871	**	0.753193	CCL14_1	CCL14	0.0464928
FP005769	9	178.074	33.7114	5.2823	0.001861	**	0.907207	TMEM129_1	TMEM129	0.0464928
FP003446	23	184.914	50.82	3.6386	0.001879	**	0.681826	CLASP1_1	CLASP1	0.0465973
FP014936	21	201.549	55.4409	3.6354	0.001892	**	0.650671	LTBR_2	LTBR	0.0468251
FP022346	15	2138.24	539.924	3.9603	0.001892	**	0.752683	IGFL2_1	IGFL2	0.0468251
FP006444	16	294.998	76.0478	3.8791	0.0019	**	0.732462	BBS7_1	BBS7	0.0468342
FP002871	16	182.025	46.9156	3.8799	0.001897	**	0.732527	AC007390.5_1	AC007390.5	0.0468342
FP021536	12	359.072	79.0959	4.5397	0.0019	**	0.848744	KANK2_2	KANK2	0.0468342
FP010857	11	219.276	45.3942	4.8305	0.001898	**	0.877059	TRAM1_1	TRAM1	0.0468342
FP005791	20	5364.18	1462.55	3.6677	0.001907	**	0.00125427	FAM193A_2	FAM193A	0.0468478
FP013194	46	188.955	56.8641	3.3229	0.001912	**	0.543232	TCF7L2_6	TCF7L2	0.0468478
FP023008	27	2414.97	689.251	3.5038	0.00191	**	0.651849	OTOR_1	OTOR	0.0468478
FP014919	17	6638.44	1767.65	3.7555	0.001909	**	0.696137	NDUFA9_1	NDUFA9	0.0468478
FP005264	14	424.592	104.811	4.051	0.001912	**	0.773758	ACPP_1	ACPP	0.0468478
FP009275	12	6838.76	1506.85	4.5384	0.001903	**	0.848679	RBAK_2	RBAK	0.0468478
FP013299	17	118.164	31.0627	3.8041	0.001935	**	0.71293	FAM53B_1	FAM53B	0.0473641
FP008931	17	84.2477	22.1557	3.8025	0.001941	**	0.71279	ECHDC1_1	ECHDC1	0.0474636
FP013576	22	3536.8	977.175	3.6194	0.001961	**	0.649018	OR10A6_1	OR10A6	0.0475979
FP016896	21	263.48	72.7555	3.6214	0.001952	**	0.649229	KLHL28_2	KLHL28	0.0475979
FP005540	20	17340	4742.03	3.6567	0.001953	**	0.663521	MFN1_3	MFN1	0.0475979
FP012562	16	1792.77	471.97	3.7985	0.001957	**	0.712415	CCNY_1	CCNY	0.0475979
FP015377	15	287.503	72.9635	3.9404	0.001962	**	0.751038	METTL7A_1	METTL7A	0.0475979
FP020635	12	172.212	39.9467	4.3111	0.001959	**	0.820816	ENGASE_1	ENGASE	0.0475979
FP010574	16	128.975	33.4062	3.8608	0.001967	**	0.730854	TNFRSF10B_1	TNFRSF10B	0.0476721
FP019169	6	241.361	33.5229	7.1999	0.001972	**	0.955144	ZDHHC7_1	ZDHHC7	0.0477461
FP023499	17	2487.49	655.82	3.7929	0.001978	**	0.711904	COL20A1_1	COL20A1	0.0477971
FP002695	16	332.266	86.127	3.8578	0.001978	**	0.730592	GEN1_1	GEN1	0.0477971
FP000278	18	452.734	121.237	3.7343	0.001994	**	0.642089	SPATA21_1	SPATA21	0.047997
FP018863	21	8472.22	2346.08	3.6112	0.001997	**	0.648168	NLRC5_2	NLRC5	0.047997
FP015237	16	123.614	32.6214	3.7894	0.001992	**	0.711572	PKP2_1	PKP2	0.047997
FP025121	16	8359.12	2169.31	3.8534	0.001995	**	0.730197	CXorf56_1	CXorf56	0.047997
FP022141	17	223.724	58.0504	3.854	0.001993	**	0.73025	SHKBP1_1	SHKBP1	0.047997
FP018331	13	196.796	48.8913	4.0252	0.001998	**	0.771763	MLST8_1	MLST8	0.047997
FP022883	17	941.276	244.376	3.8518	0.002001	**	0.730054	SDCBP2_1	SDCBP2	0.0479991
FP014225	12	359.228	83.617	4.2961	0.002002	**	0.819886	SLC29A2_1	SLC29A2	0.0479991
FP004520	43	212.77	63.8757	3.331	0.002009	**	0.314128	CSRNP1_1	CSRNP1	0.0480731
FP012516	22	159.922	44.7391	3.5745	0.002022	**	0.475499	MPP7_1	MPP7	0.04829
FP017229	18	280.244	74.1009	3.7819	0.002022	**	0.710882	GALC_1	GALC	0.04829
FP013762	22	598.68	167.5	3.5742	0.002024	**	0.634071	ELP4_1	ELP4	0.0482908
FP018412	16	196.609	51.141	3.8445	0.002029	**	0.729408	DNAJA3_1	DNAJA3	0.0483631
FP007877	18	1204.24	323.501	3.7225	0.002043	**	0.692963	BTNL8_1	BTNL8	0.0484859
FP024732	18	393.414	105.671	3.723	0.002041	**	0.693012	GAGE12F_1	GAGE12F	0.0484859
FP012559	16	1023.79	261.364	3.9171	0.002046	**	0.749093	CREM_5	CREM	0.0484859
FP003605	15	78.215	19.9581	3.919	0.002039	**	0.74925	CD302_1	CD302	0.0484859
FP016228	12	620.567	144.869	4.2836	0.002039	**	0.819101	TUBA3C_1	TUBA3C	0.0484859
FP016580	9	161.089	31.0719	5.1844	0.002046	**	0.904161	TMTC4_1	TMTC4	0.0484859
FP009544	16	252.215	65.7037	3.8387	0.002051	**	0.728893	TMED4_1	TMED4	0.0485575
FP012156	13	139.402	33.7782	4.127	0.002054	**	0.793767	LAMC3_1	LAMC3	0.0485817
FP025390	15	204.14	52.1708	3.9129	0.002061	**	0.428647	L1CAM_2	L1CAM	0.0487003
FP018917	20	264.924	72.9542	3.6314	0.002063	**	0.660941	CDH5_2	CDH5	0.0487007
FP017121	45	254.869	77.2105	3.301	0.002067	**	0.544727	ZFYVE1_1	ZFYVE1	0.0487015
FP001296	22	6488.15	1819.87	3.5652	0.002066	**	0.714765	AHCYL1_3	AHCYL1	0.0487015
FP006573	20	287.775	79.2738	3.6301	0.002069	**	0.660814	PLRG1_1	PLRG1	0.0487018
FP017925	19	11824.5	3183.36	3.7145	0.002077	**	0.643495	TMEM202_1	TMEM202	0.0487499
FP022130	17	1852.32	483.37	3.8321	0.002077	**	0.728308	PLD3_1	PLD3	0.0487499
FP009051	15	307.495	78.6579	3.9093	0.002075	**	0.748435	EPM2A_1	EPM2A	0.0487499
FP007164	22	117.156	32.6075	3.5929	0.00208	**	0.646254	CAST_1	CAST	0.0487737
FP025070	22	187.382	52.1937	3.5901	0.002093	**	0.645964	NXT2_2	NXT2	0.048985
FP009092	14	562.107	140.585	3.9983	0.002092	**	0.769671	MTHFD1L_1	MTHFD1L	0.048985
FP007894	19	81.1315	22.148	3.6632	0.0021	**	0.675373	FOXC1_1	FOXC1	0.049102
FP011457	16	121.748	31.2003	3.9021	0.002102	**	0.747834	NFX1_1	NFX1	0.049102
FP004595	20	251.048	68.5545	3.662	0.002105	**	0.675259	SLC6A20_1	SLC6A20	0.0491253
FP021800	25	198.699	56.6912	3.5049	0.002108	**	0.607517	CRTC1_2	CRTC1	0.0491486
FP024091	21	2047.1	570.847	3.5861	0.002112	**	0.645539	LARGE_3	LARGE	0.0491952
FP001861	20	2496.95	689.92	3.6192	0.002119	**	0.327407	DCAF8_1	DCAF8	0.049218
FP000878	54	371.582	114.384	3.2485	0.002121	**	0.568351	ELAVL4_3	ELAVL4	0.049218
FP023840	20	156.159	42.675	3.6593	0.002117	**	0.674983	BCL2L13_2	BCL2L13	0.049218
FP006647	16	276.196	70.8667	3.8974	0.00212	**	0.747433	HMGB2_2	HMGB2	0.049218
FP020132	59	167.505	51.8548	3.2303	0.002127	**	0.527912	NMT1_1	NMT1	0.0492641
FP022686	18	341.288	92.166	3.703	0.002126	**	0.691065	KIR3DX1_1	KIR3DX1	0.0492641
FP019803	17	11306.7	3011.32	3.7547	0.002133	**	0.708338	SLFN12L_1	SLFN12L	0.0492981
FP005289	13	504.68	126.603	3.9863	0.002136	**	0.723513	CEP63_2	CEP63	0.0492981
FP019659	16	816.027	209.64	3.8925	0.002139	**	0.74702	AKAP10_1	AKAP10	0.0493095
FP002535	22	1504.77	420.624	3.5775	0.002152	**	0.644634	HEATR1_2	HEATR1	0.0495626
FP000832	17	194.631	51.9147	3.749	0.002157	**	0.707804	IPP_1	IPP	0.0496297
FP007846	15	697.207	179.403	3.8863	0.002163	**	0.746488	CANX_1	CANX	0.0496297
FP019048	15	109.714	27.5657	3.9801	0.002159	**	0.768231	EXOSC6_1	EXOSC6	0.0496297
FP005881	15	75.9738	18.5533	4.0949	0.002162	**	0.791469	CPEB2_1	CPEB2	0.0496297
FP011540	16	67.0695	17.6034	3.81	0.002166	**	0.72633	MELK_1	MELK	0.0496522
FP012866	20	1082.43	300.02	3.6079	0.002172	**	0.65852	ANXA11_2	ANXA11	0.0497433
FP022146	33	81.5478	24.0907	3.385	0.002192	**	0.326111	NUMBL_1	NUMBL	0.0499219
FP001573	19	117.334	32.2056	3.6433	0.00219	**	0.481505	MRPL9_1	MRPL9	0.0499219
FP015061	21	16939.7	4783.71	3.5411	0.002182	**	0.63054	TAS2R9_1	TAS2R9	0.0499219
FP022090	19	443.248	121.668	3.6431	0.00219	**	0.673356	PAPL_1	PAPL	0.0499219
FP005935	18	129.788	34.6933	3.741	0.002192	**	0.707045	SMIM20_1	SMIM20	0.0499219
FP004805	16	629.853	165.555	3.8045	0.002189	**	0.72583	NEK4_1	NEK4	0.0499219
FP016162	20	171.258	47.5328	3.6029	0.002195	**	0.658012	RILPL2_1	RILPL2	0.0499439

## Sheet: Mammals negative corr
epdid	speciescount	estimate	stderr	t.value	p.value	stars	pearsoncorrelation	geneid	geneidnameonly	adjust
FP000949	18	-515.812	82.1217	-6.2811	2.019e-05	***	-0.859117	DHCR24_2	DHCR24	0.0109145
FP012617	19	-2668.3	484.116	-5.5117	4.736e-05	***	-0.809329	RBP3_1	RBP3	0.0137059
FP018916	22	-1431.84	276.837	-5.1721	6.406e-05	***	-0.773159	CDH5_1	CDH5	0.0137059
FP024853	21	-5108.46	1077.21	-4.7423	0.0001627	***	-0.74528	PDZD11_1	PDZD11	0.018532
FP025394	16	-265.97	51.7989	-5.1347	0.0001917	***	-0.264685	ARHGAP4_1	ARHGAP4	0.0191318
FP015394	28	-6147.74	1401.02	-4.3881	0.0001969	***	-0.292463	CELA1_1	CELA1	0.0193756
FP014507	19	-521.384	110.305	-4.7267	0.000228	***	-0.454166	MGC5306_1	MGC5306	0.0208867
FP016461	17	-222.073	45.7628	-4.8527	0.000256	***	-0.791929	RNASEH2B_1	RNASEH2B	0.0218828
FP015264	19	-201.723	43.3993	-4.6481	0.0002679	***	-0.757971	PUS7L_1	PUS7L	0.0223019
FP004843	14	-225.064	42.9896	-5.2353	0.0002788	***	-0.844752	ARHGEF3_3	ARHGEF3	0.0224432
FP002783	21	-10212	2240.45	-4.558	0.000279	***	-0.357515	C2orf53_1	C2orf53	0.0224432
FP010238	29	-4851.21	1158.14	-4.1888	0.0002853	***	-0.742896	TAS2R4_1	TAS2R4	0.02245
FP021208	16	-298.939	61.9405	-4.8262	0.0003309	***	-0.801124	RPS15_1	RPS15	0.0238939
FP015057	21	-38291.1	8682.32	-4.4102	0.0003377	***	-0.339485	KLRC1_1	KLRC1	0.0241014
FP023025	17	-4864	1074.07	-4.5286	0.0004726	***	-0.770907	CSRP2BP_2	CSRP2BP	0.0271728
FP003949	17	-5160.91	1159.48	-4.451	0.0005483	***	-0.76547	C2orf80_1	C2orf80	0.0290019
FP001165	19	-392.063	92.0147	-4.2609	0.0005975	***	-0.729074	BTBD8_1	BTBD8	0.0300725
FP012475	76	-13625.8	3814.69	-3.5719	0.0006461	***	-0.573178	SPAG6_2	SPAG6	0.0304461
FP007203	21	-636.323	154.736	-4.1123	0.000654	***	-0.695993	TSLP_3	TSLP	0.03054
FP013291	26	253.19	64.3555	3.9342	0.0006622	***	-0.00644828	BUB3_1	BUB3	0.0306171
FP013452	19	-418.61	99.6918	-4.199	0.0006799	***	-0.72406	SYT8_1	SYT8	0.0308544
FP001627	17	-23022.5	5320.53	-4.3271	0.0006961	***	-0.756425	S100A12_1	S100A12	0.0309768
FP016636	18	-6302.08	1465.48	-4.3004	0.000733	***	-0.754413	CUL4A_3	CUL4A	0.0313783
FP002001	17	-3539.65	812.928	-4.3542	0.0007809	***	-0.770215	PRRC2C_2	PRRC2C	0.0323303
FP009049	14	-15580.9	3397.87	-4.5855	0.0007833	***	-0.810269	EPM2A_3	EPM2A	0.0323751
FP019982	18	-30290.7	7370.4	-4.1098	0.0009277	***	-0.734709	KRT37_1	KRT37	0.034401
FP015977	20	-958.681	239.725	-3.9991	0.0009291	***	-0.696228	C12orf76_1	C12orf76	0.034401
FP025112	21	-1693.35	420.464	-4.0273	0.0009744	***	-0.672073	DOCK11_2	DOCK11	0.0351285
FP008782	20	-1044.31	262.73	-3.9749	0.000979	***	-0.402078	SIM1_1	SIM1	0.0351742
FP002672	16	-1528.6	362.781	-4.2136	0.0010136	**	-0.759797	GREB1_2	GREB1	0.0358071
FP017385	21	-578.844	146.239	-3.9582	0.0010151	**	-0.692534	CDC42BPB_2	CDC42BPB	0.0358071
FP011673	21	-6481.91	1646.79	-3.9361	0.001065	**	-0.690512	ZCCHC6_2	ZCCHC6	0.0367575
FP010072	16	-3748.58	900.613	-4.1623	0.0011154	**	-0.755846	CPED1_4	CPED1	0.0377734
FP013964	12	-5316.07	1185.08	-4.4858	0.0011684	**	-0.817328	GLYATL2_1	GLYATL2	0.0383494
FP004291	18	-608.511	150.444	-4.0448	0.001206	**	-0.734078	RAD18_1	RAD18	0.0389341
FP010020	87	-5512.74	1639.76	-3.3619	0.0012076	**	-0.380765	DOCK4_4	DOCK4	0.0389341
FP000086	14	-3833.26	892.76	-4.2937	0.0012692	**	-0.791396	ACTRT2_1	ACTRT2	0.0390724
FP023363	17	-2683.87	654.493	-4.1007	0.001252	**	-0.750991	CSE1L_1	CSE1L	0.0390724
FP004762	17	-3992.46	993.134	-4.0201	0.0012653	**	-0.732	IQCF1_1	IQCF1	0.0390724
FP015155	18	-1393.84	348.185	-4.0032	0.0013079	**	-0.730567	GOLT1B_1	GOLT1B	0.0393508
FP015247	17	-4518.27	1132.48	-3.9897	0.001343	**	-0.729419	C12orf40_1	C12orf40	0.0399177
FP013157	19	-696.808	181.455	-3.8401	0.0014451	**	-0.692543	ITPRIP_2	ITPRIP	0.0414955
FP009045	17	-849.646	211.74	-4.0127	0.0014764	**	-0.743834	SF3B5_1	SF3B5	0.0419011
FP006208	17	-273.175	69.4936	-3.9309	0.001507	**	-0.724331	PRKG2_3	PRKG2	0.0423119
FP020395	18	-3292.77	851.245	-3.8682	0.0015166	**	-0.706668	CSH2_1	CSH2	0.0424562
FP019264	13	-327.287	75.8277	-4.3162	0.0015222	**	-0.806667	VPS53_1	VPS53	0.0425644
FP002038	16	-441.938	110.886	-3.9855	0.0015539	**	-0.741571	KIAA0040_1	KIAA0040	0.0428886
FP005626	20	-11339	3025.12	-3.7483	0.001601	**	-0.672674	FETUB_3	FETUB	0.0433158
FP021473	15	-920.581	228.24	-4.0334	0.001659	**	-0.758615	ZNF561_1	ZNF561	0.0440301
FP012419	20	-1738.44	465.896	-3.7314	0.0016607	**	-0.671009	BEND7_1	BEND7	0.0440301
FP020914	85	-8318.2	2550.18	-3.2618	0.0016673	**	-0.0792617	DTNA_3	DTNA	0.0441098
FP001904	15	-1107.69	276.253	-4.0097	0.0017313	**	-0.756711	FCGR3A_1	FCGR3A	0.0450709
FP003970	18	-5053.72	1313.41	-3.8478	0.0017753	**	-0.716924	CPS1_2	CPS1	0.0455801
FP020243	19	-692.975	186.471	-3.7163	0.0018768	**	-0.680647	SAMD14_2	SAMD14	0.0465898
FP016523	17	-5908.48	1554.33	-3.8013	0.001946	**	-0.640272	EDNRB_1	EDNRB	0.0475386
FP006375	16	-7717.57	1997.6	-3.8634	0.0019571	**	-0.731085	HADH_1	HADH	0.0475979
FP003212	16	-13773.6	3576.87	-3.8507	0.002005	**	-0.729966	ST3GAL5_2	ST3GAL5	0.0480242
FP020397	17	-2756.52	733.99	-3.7555	0.00213	**	-0.708415	CSH1_1	CSH1	0.0492871
FP001451	20	-198.233	54.2377	-3.6549	0.0021365	**	-0.674543	PIAS3_1	PIAS3	0.0492981

## Sheet: Primates full list
epdid	speciescount	estimate	stderr	t.value	p.value	stars	pearsoncorrelation	geneid	geneidnameonly	adjust
FP018129	21	268.804	28.65	9.3823	2.36e-08	***	0.928939	WDR93_1	WDR93	0.000577822
FP017717	19	3404.09	397.352	8.567	2.256e-07	***	0.906099	GLDN_2	GLDN	0.00186813
FP016767	27	16992.8	2414.85	7.0368	2.827e-07	***	0.820696	AP1G2_1	AP1G2	0.00186813
FP008738	21	410.603	52.1248	7.8773	3.052e-07	***	0.880424	ORC3_1	ORC3	0.00186813
FP024056	19	164.247	20.1531	8.15	4.354e-07	***	0.897706	RNF185_1	RNF185	0.00213207
FP018860	18	169.333	20.4621	8.2755	5.661e-07	***	0.905717	HERPUD1_1	HERPUD1	0.00231007
FP015981	21	282.331	38.2752	7.3764	7.632e-07	***	0.866844	ANAPC7_1	ANAPC7	0.00266946
FP016589	21	288.895	39.861	7.2476	9.711e-07	***	0.863008	KDELC1_1	KDELC1	0.00297205
FP017480	23	3455.88	508.714	6.7934	1.321e-06	***	0.835259	TJP1_3	TJP1	0.00304744
FP019952	23	5813.77	868.745	6.6921	1.634e-06	***	0.831436	KRTAP3-2_1	KRTAP3-2	0.00304744
FP005418	27	3736.64	594.839	6.2818	1.711e-06	***	0.788551	MBNL1_1	MBNL1	0.00304744
FP010368	15	124.969	14.4999	8.6186	1.74e-06	***	0.927857	DPP6_1	DPP6	0.00304744
FP015008	14	231.223	25.2882	9.1435	1.795e-06	***	0.940067	CLEC4C_1	CLEC4C	0.00304744
FP020256	20	523.043	73.7192	7.0951	1.797e-06	***	0.86461	EPN3_2	EPN3	0.00304744
FP008963	18	5012.73	667.727	7.5072	1.867e-06	***	0.888702	TAAR6_1	TAAR6	0.00304744
FP018038	15	12038.5	1435.49	8.3863	2.313e-06	***	0.924254	C15orf37_1	C15orf37	0.00342912
FP023641	26	1098.84	176.775	6.2161	2.423e-06	***	0.791747	DONSON_2	DONSON	0.00342912
FP002225	25	266.661	42.43	6.2847	2.521e-06	***	0.801414	ATP2B4_1	ATP2B4	0.00342912
FP016310	25	237.457	38.1187	6.2294	2.863e-06	***	0.798869	MTUS2_2	MTUS2	0.00368935
FP016987	18	1313.07	183.099	7.1714	3.222e-06	***	0.879882	PSMA3_1	PSMA3	0.00394437
FP000949	17	-468.082	63.582	-7.3619	3.554e-06	***	-0.896395	DHCR24_2	DHCR24	0.00414363
FP005294	17	12844.6	1763.16	7.285	4.001e-06	***	0.889532	PPP2R3A_2	PPP2R3A	0.00445275
FP008178	20	161.152	24.3833	6.6091	4.427e-06	***	0.848436	MDC1_1	MDC1	0.00471264
FP022757	16	1114.98	156.1	7.1428	4.991e-06	***	0.885821	NLRP4_1	NLRP4	0.00509165
FP004613	19	5616.23	845.791	6.6402	5.68e-06	***	0.856588	RTP3_1	RTP3	0.00556276
FP014069	18	193.715	28.5539	6.7842	6.156e-06	***	0.868448	TAF6L_1	TAF6L	0.005577
FP019932	17	694.043	102.356	6.7807	6.193e-06	***	0.868336	GJD3_1	GJD3	0.005577
FP001728	24	225.178	38.0102	5.9241	7.02e-06	***	0.790973	RUSC1_1	RUSC1	0.005577
FP020387	20	5127.47	805.46	6.3659	7.036e-06	***	0.83933	DDX42_3	DDX42	0.005577
FP015342	19	189.796	29.8221	6.3643	7.058e-06	***	0.839267	C1QL4_1	C1QL4	0.005577
FP011919	22	268.295	43.9159	6.1093	7.126e-06	***	0.814041	RGS3_7	RGS3	0.005577
FP007006	21	527.697	84.9178	6.2142	7.289e-06	***	0.825876	CCNB1_1	CCNB1	0.005577
FP022857	15	179.816	24.311	7.3965	8.314e-06	***	0.905601	ZCCHC3_1	ZCCHC3	0.00600143
FP005553	18	384.027	58.328	6.584	8.673e-06	***	0.861931	DNAJC19_1	DNAJC19	0.00600143
FP001789	24	298.009	51.3096	5.8081	9.147e-06	***	0.785063	ISG20L2_2	ISG20L2	0.00600143
FP018380	18	1149.88	175.77	6.5419	9.326e-06	***	0.860507	ZSCAN10_1	ZSCAN10	0.00600143
FP008611	26	222.139	39.3034	5.6519	9.4e-06	***	0.849713	GCLC_1	GCLC	0.00600143
FP002260	21	232.943	38.3431	6.0752	9.664e-06	***	0.819867	CDK18_1	CDK18	0.00600143
FP020214	18	4146.9	637.154	6.5085	9.884e-06	***	0.859357	SNF8_1	SNF8	0.00600143
FP001788	22	255.874	43.0205	5.9477	1.003e-05	***	0.806584	CRABP2_1	CRABP2	0.00600143
FP020008	25	417.428	73.5676	5.6741	1.048e-05	***	0.770752	DNAJC7_1	DNAJC7	0.00600143
FP024852	19	314.907	49.9668	6.3023	1.053e-05	***	0.844303	RAB41_1	RAB41	0.00600143
FP017187	20	530.304	86.1283	6.1571	1.054e-05	***	0.864055	IFT43_1	IFT43	0.00600143
FP017660	17	254.523	38.3332	6.6398	1.115e-05	***	0.871195	TRIM69_1	TRIM69	0.00620447
FP017563	17	243.055	36.742	6.6152	1.16e-05	***	0.870414	RAD51_1	RAD51	0.00631143
FP006465	21	322.54	54.0097	5.9719	1.194e-05	***	0.815215	INTU_1	INTU	0.00635519
FP019258	17	127.748	19.405	6.5833	1.222e-05	***	0.869391	GAS8_2	GAS8	0.00636584
FP011127	17	97.8354	14.926	6.5547	1.281e-05	***	0.868466	FAM91A1_1	FAM91A1	0.00640905
FP012569	17	166.017	25.3931	6.5379	1.317e-05	***	0.867916	ZNF248_1	ZNF248	0.00640905
FP015459	16	3515.45	519.247	6.7703	1.321e-05	***	0.882638	ITGB7_2	ITGB7	0.00640905
FP021002	17	173.781	26.615	6.5294	1.335e-05	***	0.867638	MAPK4_2	MAPK4	0.00640905
FP008502	20	209.88	34.8457	6.0231	1.37e-05	***	0.825179	MRPL2_1	MRPL2	0.00645059
FP014066	15	237.997	35.4494	6.7137	1.44e-05	***	0.880993	TTC9C_2	TTC9C	0.00652324
FP011354	17	209.132	32.2931	6.4761	1.458e-05	***	0.865869	KDM4C_2	KDM4C	0.00652324
FP008541	21	4161.14	709.507	5.8648	1.488e-05	***	0.842807	HSP90AB1_2	HSP90AB1	0.00652324
FP018325	17	112.831	17.4594	6.4625	1.492e-05	***	0.865413	NTHL1_1	NTHL1	0.00652324
FP018007	17	490.028	76.2182	6.4293	1.576e-05	***	0.814484	TSPAN3_1	TSPAN3	0.00676961
FP006148	20	208.868	35.2286	5.9289	1.65e-05	***	0.820994	PF4V1_1	PF4V1	0.00685137
FP022277	17	311.63	48.6835	6.4012	1.651e-05	***	0.863329	ZNF112_1	ZNF112	0.00685137
FP025429	20	208.077	35.4071	5.8767	1.83e-05	***	0.818615	G6PD_1	G6PD	0.00711896
FP006442	18	295.548	48.0304	6.1533	1.847e-05	***	0.846317	EXOSC9_1	EXOSC9	0.00711896
FP007855	19	5447.49	909.53	5.9893	1.89e-05	***	0.831595	SQSTM1_4	SQSTM1	0.00711896
FP013299	12	172.844	22.8181	7.5749	1.893e-05	***	0.922814	FAM53B_1	FAM53B	0.00711896
FP012097	14	391.294	54.9572	7.12	1.942e-05	***	0.906478	ODF2_1	ODF2	0.00711896
FP004101	22	195.518	34.6671	5.6399	1.944e-05	***	0.79123	SPHKAP_1	SPHKAP	0.00711896
FP000593	20	212.623	36.4036	5.8407	1.966e-05	***	0.816952	YARS_2	YARS	0.00711896
FP001958	19	175.122	29.439	5.9486	2.041e-05	***	0.82984	MPC2_2	MPC2	0.00711896
FP019824	15	3331.32	493.888	6.7451	2.058e-05	***	0.889545	CCL3L3_1	CCL3L3	0.00711896
FP018945	21	202.726	35.547	5.703	2.082e-05	***	0.802333	B3GNT9_1	B3GNT9	0.00711896
FP014501	25	12020.1	2232.9	5.3832	2.094e-05	***	0.753954	FAT3_1	FAT3	0.00711896
FP008617	19	240.773	40.5789	5.9335	2.101e-05	***	0.829178	FAM83B_1	FAM83B	0.00711896
FP005776	19	15164.4	2612.96	5.8035	2.117e-05	***	0.81521	WHSC1_4	WHSC1	0.00711896
FP008740	16	4254.13	658.58	6.4595	2.134e-05	***	0.873185	SPACA1_1	SPACA1	0.00711896
FP011997	24	267.799	49.2867	5.4335	2.17e-05	***	0.764426	RABGAP1_2	RABGAP1	0.00711896
FP008140	21	129.069	22.747	5.6741	2.212e-05	***	0.800876	GABBR1_1	GABBR1	0.00711896
FP021813	14	355.531	50.7562	7.0047	2.256e-05	***	0.903807	SUGP2_1	SUGP2	0.00711896
FP014378	17	3931.59	633.45	6.2066	2.288e-05	***	0.856415	UCP3_1	UCP3	0.00711896
FP016449	21	5621.03	993.629	5.6571	2.292e-05	***	0.800011	SETDB2_2	SETDB2	0.00711896
FP004052	23	325.207	59.3305	5.4813	2.297e-05	***	0.774827	PTPRN_1	PTPRN	0.00711896
FP017708	17	99.2485	16.0339	6.1899	2.354e-05	***	0.855799	USP8_1	USP8	0.00713825
FP009918	19	155.048	26.4464	5.8627	2.404e-05	***	0.826051	SRRT_1	SRRT	0.00713825
FP004125	18	293.477	48.884	6.0035	2.417e-05	***	0.840314	SPATA3_1	SPATA3	0.00713825
FP001927	22	375.617	67.8314	5.5375	2.428e-05	***	0.785767	RGS4_3	RGS4	0.00713825
FP011340	14	91.3355	13.7874	6.6245	2.449e-05	***	0.886156	CD274_1	CD274	0.00713825
FP015429	22	3656.17	664.242	5.5043	2.611e-05	***	0.783953	KRT5_1	KRT5	0.00750751
FP005244	19	200.724	34.5461	5.8103	2.657e-05	***	0.823684	PLXND1_2	PLXND1	0.00750751
FP004959	19	17033.1	2934.12	5.8052	2.684e-05	***	0.82345	PROS1_2	PROS1	0.00750751
FP012617	18	-2387.22	411.744	-5.7978	2.722e-05	***	-0.823113	RBP3_1	RBP3	0.00750751
FP014319	24	567.586	106.388	5.3351	2.729e-05	***	0.758578	SHANK2_2	SHANK2	0.00750751
FP017388	17	339.149	55.6357	6.0959	2.762e-05	***	0.852261	TNFAIP2_1	TNFAIP2	0.00751387
FP006950	25	849.356	162.178	5.2372	2.972e-05	***	0.744922	GPBP1_4	GPBP1	0.00799631
FP009339	14	1299.24	200.742	6.4722	3.059e-05	***	0.909157	LRRC72_1	LRRC72	0.00811358
FP009009	18	187.111	31.8908	5.8672	3.096e-05	***	0.83457	IFNGR1_1	IFNGR1	0.00811358
FP002659	21	341.536	61.9739	5.511	3.115e-05	***	0.792385	HPCAL1_5	HPCAL1	0.00811358
FP002220	14	328.822	51.2063	6.4215	3.296e-05	***	0.880107	CHIT1_1	CHIT1	0.00849466
FP024719	16	2169.53	351.507	6.1721	3.366e-05	***	0.863465	CACNA1F_1	CACNA1F	0.00854467
FP002963	20	1583.84	284.382	5.5694	3.391e-05	***	0.803722	GTF2A1L_1	GTF2A1L	0.00854467
FP004123	20	262.697	47.2313	5.5619	3.443e-05	***	0.803338	ITM2C_2	ITM2C	0.00854467
FP004526	17	17972.3	3012.77	5.9654	3.455e-05	***	0.847148	CCR8_1	CCR8	0.00854467
FP015215	17	5774.98	969.236	5.9583	3.497e-05	***	0.846864	IPO8_2	IPO8	0.00856205
FP005439	20	13987.8	2521.99	5.5463	3.553e-05	***	0.832467	KCNAB1_4	KCNAB1	0.00861303
FP017536	16	255.152	41.6081	6.1323	3.589e-05	***	0.862037	GPR176_1	GPR176	0.00861501
FP011994	22	279.116	52.17	5.3501	3.659e-05	***	0.809597	ZBTB26_2	ZBTB26	0.00863532
FP014815	18	487.469	84.4165	5.7746	3.668e-05	***	0.830503	ST3GAL4_3	ST3GAL4	0.00863532
FP023048	24	-418.157	80.4307	-5.199	3.752e-05	***	-0.74183	NKX2-2_1	NKX2-2	0.00874895
FP019325	17	212.365	35.9276	5.9109	3.796e-05	***	0.844943	SPATA22_2	SPATA22	0.00876804
FP001720	17	3957.3	671.282	5.8951	3.901e-05	***	0.844297	FAM189B_2	FAM189B	0.00892636
FP002568	23	6844.98	1305.96	5.2413	3.957e-05	***	0.807103	HNRNPU_2	HNRNPU	0.00897067
FP002623	18	379.191	66.2507	5.7236	4.029e-05	***	0.828206	ADI1_1	ADI1	0.0090501
FP008562	19	134.73	24.1361	5.5821	4.129e-05	***	0.856948	TDRD6_1	TDRD6	0.0091904
FP002840	20	3294.3	604.838	5.4466	4.353e-05	***	0.797311	CAPN13_2	CAPN13	0.00956843
FP010964	21	395.77	73.9704	5.3504	4.377e-05	***	0.783553	RBM12B_1	RBM12B	0.00956843
FP013454	20	295.08	54.2823	5.436	4.448e-05	***	0.796746	TNNI2_1	TNNI2	0.0096376
FP001745	17	670.185	115.276	5.8138	4.494e-05	***	0.840899	RIT1_1	RIT1	0.00965185
FP017375	14	74.8807	12.0741	6.2017	4.575e-05	***	0.873038	ZNF839_1	ZNF839	0.00974037
FP013485	17	414.765	71.5518	5.7967	4.63e-05	***	0.840175	SLC22A18_1	SLC22A18	0.00977249
FP014513	14	1393.08	215.749	6.4569	4.697e-05	***	0.889517	PANX1_1	PANX1	0.00982918
FP002131	17	744.177	128.814	5.7772	4.791e-05	***	0.880535	RGS2_1	RGS2	0.00994092
FP018132	13	128.153	18.914	6.7755	4.886e-05	***	0.906165	ANPEP_1	ANPEP	0.00997927
FP004836	20	202.338	37.5426	5.3896	4.891e-05	***	0.794238	WNT5A_2	WNT5A	0.00997927
FP001650	19	161.851	29.4817	5.4899	4.943e-05	***	0.80822	INTS3_1	INTS3	0.00998626
FP008440	19	239.984	43.7418	5.4864	4.976e-05	***	0.808042	DAAM2_2	DAAM2	0.00998626
FP015875	14	144.924	23.6063	6.1392	5.028e-05	***	0.87092	UTP20_1	UTP20	0.0100086
FP006164	17	14578.9	2538.4	5.7434	5.083e-05	***	0.837879	C4orf26_1	C4orf26	0.0100365
FP016331	20	1180	220.499	5.3515	5.288e-05	***	0.792154	CG005_1	CG005	0.010169
FP015108	19	584.271	107.194	5.4506	5.338e-05	***	0.806201	HIST4H4_1	HIST4H4	0.010169
FP007770	15	110.302	18.7417	5.8854	5.363e-05	***	0.852706	HRH2_1	HRH2	0.010169
FP001943	15	254.525	41.7489	6.0966	5.364e-05	***	0.869448	POGK_1	POGK	0.010169
FP002226	20	-3769.99	705.683	-5.3423	5.388e-05	***	-0.791648	ATP2B4_2	ATP2B4	0.010169
FP007100	21	210.709	40.1339	5.2502	5.42e-05	***	0.777787	MTX3_1	MTX3	0.010169
FP011423	21	1513.05	288.602	5.2427	5.507e-05	***	0.777349	CDKN2B_1	CDKN2B	0.010169
FP010839	22	739.751	143.304	5.1621	5.542e-05	***	0.764047	COPS5_1	COPS5	0.010169
FP012781	14	3833.16	605.08	6.335	5.56e-05	***	0.885929	PSAP_1	PSAP	0.010169
FP017345	22	1151.88	223.235	5.16	5.569e-05	***	0.831684	EML1_1	EML1	0.010169
FP011533	20	326.148	61.2713	5.323	5.607e-05	***	0.790575	CCIN_1	CCIN	0.010169
FP016461	17	-200.963	35.3796	-5.6802	5.681e-05	***	-0.835101	RNASEH2B_1	RNASEH2B	0.0102275
FP020123	21	113.808	21.8115	5.2178	5.808e-05	***	0.775884	EFTUD2_1	EFTUD2	0.0103798
FP020740	20	178.248	33.6244	5.3012	5.865e-05	***	0.801653	METRNL_2	METRNL	0.0104048
FP017372	22	282.16	54.9659	5.1334	5.907e-05	***	0.762266	WDR20_1	WDR20	0.0104048
FP021148	16	3084.92	531.832	5.8006	6.17e-05	***	0.849299	THEG_1	THEG	0.010773
FP018782	20	214.569	40.723	5.269	6.266e-05	***	0.787538	DNAJA2_1	DNAJA2	0.010773
FP018437	13	579.818	92.808	6.2475	6.282e-05	***	0.883255	NAGPA_1	NAGPA	0.010773
FP002842	21	258.081	49.8179	5.1805	6.292e-05	***	0.773661	GALNT14_1	GALNT14	0.010773
FP008166	19	110.887	20.706	5.3553	6.439e-05	***	0.801182	ABCF1_1	ABCF1	0.0108844
FP014402	21	272.064	52.631	5.1693	6.446e-05	***	0.772986	SERPINH1_1	SERPINH1	0.0108844
FP007541	20	218.249	41.5717	5.2499	6.518e-05	***	0.786452	KCTD16_1	KCTD16	0.0109306
FP011123	18	3616.71	677.607	5.3375	6.67e-05	***	0.800224	FBXO32_2	FBXO32	0.0109357
FP021635	18	3010.55	552.337	5.4506	6.699e-05	***	0.815166	C19orf53_1	C19orf53	0.0109357
FP022007	21	419.511	81.4622	5.1498	6.721e-05	***	0.771808	ZNF260_1	ZNF260	0.0109357
FP004220	14	35.0617	5.66092	6.1936	6.776e-05	***	0.881563	MYEOV2_1	MYEOV2	0.0109357
FP005204	21	2545.48	495.055	5.1418	6.837e-05	***	0.771326	ABTB1_2	ABTB1	0.0109357
FP017107	12	136.388	20.97	6.5039	6.861e-05	***	0.899333	PCNX_1	PCNX	0.0109357
FP003786	22	273.704	54.0745	5.0616	6.929e-05	***	0.757748	TFPI_1	TFPI	0.0109357
FP013981	20	26454.6	5083.5	5.204	7.167e-05	***	0.783807	MS4A2_1	MS4A2	0.0109357
FP022643	14	156.259	25.3972	6.1526	7.181e-05	***	0.880251	ZNF331_5	ZNF331	0.0109357
FP006411	23	17026.6	3420.81	4.9774	7.24e-05	***	0.743851	ANK2_5	ANK2	0.0109357
FP001421	21	36039.5	7045.88	5.115	7.244e-05	***	0.769688	FCGR1B_1	FCGR1B	0.0109357
FP019286	20	313.951	60.398	5.198	7.256e-05	***	0.767427	MYO1C_1	MYO1C	0.0109357
FP004996	17	139.373	25.1483	5.542	7.257e-05	***	0.828794	TFG_2	TFG	0.0109357
FP021208	16	-263.699	46.264	-5.6999	7.295e-05	***	-0.845112	RPS15_1	RPS15	0.0109357
FP001398	16	1803.83	316.484	5.6996	7.298e-05	***	0.8451	TRIM45_1	TRIM45	0.0109357
FP005887	20	10466.1	2015.71	5.1923	7.343e-05	***	0.783123	FBXL5_2	FBXL5	0.0109357
FP023691	16	560.742	98.4874	5.6935	7.372e-05	***	0.844843	DSCR4_1	DSCR4	0.0109357
FP017878	14	74.0366	12.5923	5.8795	7.487e-05	***	0.861578	C15orf61_1	C15orf61	0.0109357
FP010013	17	177.156	32.0795	5.5224	7.516e-05	***	0.827872	PNPLA8_2	PNPLA8	0.0109357
FP010139	17	340.577	61.6817	5.5215	7.528e-05	***	0.827831	ZC3HC1_1	ZC3HC1	0.0109357
FP007055	20	263.814	50.9292	5.18	7.532e-05	***	0.782407	HEXB_1	HEXB	0.0109357
FP000536	24	4345.23	886.391	4.9022	7.554e-05	***	0.798188	PUM1_3	PUM1	0.0109357
FP023189	12	2490.47	387.575	6.4258	7.578e-05	***	0.897236	EPB41L1_1	EPB41L1	0.0109357
FP002464	15	148.829	25.3521	5.8705	7.593e-05	***	0.861236	TRIM17_1	TRIM17	0.0109357
FP022606	16	2784.86	491.574	5.6652	7.73e-05	***	0.843633	ZNF766_2	ZNF766	0.0110472
FP014775	15	123.949	21.1785	5.8526	7.807e-05	***	0.860556	SIAE_1	SIAE	0.0110472
FP025369	15	5987.95	1025.54	5.8388	7.975e-05	***	0.86003	ATP2B3_1	ATP2B3	0.0110472
FP002729	20	771.506	149.904	5.1467	8.071e-05	***	0.780443	TP53I3_1	TP53I3	0.0110472
FP020336	22	294.841	59.0977	4.989	8.147e-05	***	0.753064	PTRH2_1	PTRH2	0.0110472
FP003570	21	324.261	64.1037	5.0584	8.184e-05	***	0.727835	ARL6IP6_1	ARL6IP6	0.0110472
FP022308	19	101.582	19.4123	5.2329	8.208e-05	***	0.794475	ERCC2_1	ERCC2	0.0110472
FP008999	19	227.72	44.333	5.1366	8.242e-05	***	0.779842	MAP7_1	MAP7	0.0110472
FP010352	19	153.71	29.3888	5.2302	8.251e-05	***	0.794328	WDR86_1	WDR86	0.0110472
FP012896	18	333.352	62.5047	5.3332	8.361e-05	***	0.809149	MMRN2_1	MMRN2	0.0110472
FP017012	21	242.12	47.9721	5.0471	8.385e-05	***	0.765475	C14orf39_1	C14orf39	0.0110472
FP011888	17	151.635	27.7759	5.4592	8.416e-05	***	0.824856	HSDL2_1	HSDL2	0.0110472
FP025170	15	144.079	24.8303	5.8025	8.44e-05	***	0.858628	DCAF12L1_1	DCAF12L1	0.0110472
FP001425	16	3892.53	693.689	5.6113	8.462e-05	***	0.841298	NBPF8_2	NBPF8	0.0110472
FP000156	17	347.347	63.7218	5.451	8.541e-05	***	0.824458	CA6_1	CA6	0.0110472
FP017185	12	13890.6	2194.57	6.3296	8.575e-05	***	0.894569	TTLL5_3	TTLL5	0.0110472
FP013869	18	118.598	22.2937	5.3198	8.577e-05	***	0.808443	DGKZ_4	DGKZ	0.0110472
FP010962	26	4477.23	941.651	4.7547	8.581e-05	***	0.704052	C8orf87_1	C8orf87	0.0110472
FP017404	13	141.875	22.474	6.3128	8.762e-05	***	0.894095	TDRD9_1	TDRD9	0.0110472
FP003427	11	125.627	18.7448	6.702	8.834e-05	***	0.912729	C1QL2_1	C1QL2	0.0110472
FP004312	18	150.643	28.4028	5.3038	8.841e-05	***	0.807599	JAGN1_1	JAGN1	0.0110472
FP012558	19	4091.36	787.663	5.1943	8.863e-05	***	0.815766	CREM_4	CREM	0.0110472
FP012915	19	130.457	25.1223	5.1929	8.888e-05	***	0.714411	RNLS_1	RNLS	0.0110472
FP013837	15	274.241	47.606	5.7606	9.012e-05	***	0.856985	HSD17B12_1	HSD17B12	0.0110472
FP011038	18	103.751	19.604	5.2923	9.036e-05	***	0.806991	ATP6V1C1_1	ATP6V1C1	0.0110472
FP010332	16	1741.62	312.8	5.5678	9.106e-05	***	0.839376	ASIC3_1	ASIC3	0.0110472
FP005149	14	284.56	47.543	5.9853	9.116e-05	***	0.874688	PARP15_2	PARP15	0.0110472
FP020806	17	310.519	57.3659	5.4129	9.145e-05	***	0.822603	TXNDC2_1	TXNDC2	0.0110472
FP003160	17	1375.33	254.132	5.4119	9.163e-05	***	0.82255	M1AP_1	M1AP	0.0110472
FP015093	17	18010.5	3327.96	5.4119	9.163e-05	***	0.82255	APOLD1_2	APOLD1	0.0110472
FP004234	22	237.048	48.0345	4.9349	9.195e-05	***	0.811849	KIF1A_2	KIF1A	0.0110472
FP002685	20	201.249	39.5994	5.0821	9.231e-05	***	0.776571	DDX1_2	DDX1	0.0110472
FP019012	20	139.437	27.4399	5.0816	9.242e-05	***	0.776537	ESRP2_1	ESRP2	0.0110472
FP017795	22	323.752	65.6664	4.9302	9.292e-05	***	0.749183	RORA_2	RORA	0.0110472
FP013127	22	337.372	68.4711	4.9272	9.355e-05	***	0.748981	CNNM2_1	CNNM2	0.0110472
FP004188	18	211.509	40.104	5.274	9.356e-05	***	0.806013	COPS8_1	COPS8	0.0110472
FP018375	18	174.604	33.1095	5.2735	9.365e-05	***	0.805988	MMP25_1	MMP25	0.0110472
FP004992	19	141.716	27.4346	5.1656	9.385e-05	***	0.69626	TMEM45A_1	TMEM45A	0.0110472
FP017951	18	2000.76	380.016	5.2649	9.519e-05	***	0.805526	STRA6_1	STRA6	0.011064
FP019565	20	275.061	54.3063	5.065	9.567e-05	***	0.775529	TEKT3_1	TEKT3	0.011064
FP022919	17	333.011	61.8072	5.3879	9.568e-05	***	0.821366	GNRH2_1	GNRH2	0.011064
FP003030	19	281.645	54.6318	5.1553	9.58e-05	***	0.790072	UGP2_2	UGP2	0.011064
FP018754	17	7648.01	1421.63	5.3797	9.71e-05	***	0.82096	C16orf98_1	C16orf98	0.0111615
FP006032	16	269.938	50.2108	5.3761	9.774e-05	***	0.820779	CWH43_1	CWH43	0.0111652
FP009991	20	855.355	169.339	5.0511	9.847e-05	***	0.774682	PIK3CG_2	PIK3CG	0.0111652
FP004758	20	307.84	60.9461	5.051	9.85e-05	***	0.774675	RAD54L2_2	RAD54L2	0.0111652
FP017005	20	564.91	111.918	5.0475	9.922e-05	***	0.77446	RTN1_2	RTN1	0.011184
FP004091	25	192.071	40.5398	4.7378	9.958e-05	***	0.750184	IRS1_1	IRS1	0.011184
FP002909	13	4203.21	710.292	5.9176	0.0001005	***	0.872332	MTA3_4	MTA3	0.0112006
FP022238	18	880.186	168.192	5.2332	0.0001011	***	0.832579	XRCC1_1	XRCC1	0.0112006
FP016308	17	195.004	36.3998	5.3573	0.0001011	***	0.819838	SLC46A3_1	SLC46A3	0.0112006
FP012442	17	287.095	53.6886	5.3474	0.0001029	***	0.819342	PTER_1	PTER	0.0113487
FP001540	24	2313.35	485.007	4.7697	0.0001034	***	0.721113	FAM63A_3	FAM63A	0.0113527
FP001060	19	133.896	26.2395	5.1029	0.0001064	***	0.787021	FPGT_1	FPGT	0.0116299
FP024853	21	-4614.39	935.46	-4.9327	0.0001074	***	-0.758149	PDZD11_1	PDZD11	0.011687
FP011535	19	1119.45	219.746	5.0943	0.0001083	***	0.786518	GNE_2	GNE	0.0117135
FP011242	18	207.481	39.9315	5.1959	0.0001086	***	0.801772	PLEC_4	PLEC	0.0117135
FP011923	21	1342.14	272.583	4.9238	0.0001095	***	0.757563	AMBP_1	AMBP	0.0117588
FP008259	21	3546.81	720.768	4.9209	0.0001102	***	0.757372	VWA7_1	VWA7	0.0117776
FP013652	20	106.092	21.2426	4.9943	0.0001109	***	0.771161	BTBD10_1	BTBD10	0.0117776
FP024073	19	10647.4	2095.69	5.0806	0.0001113	***	0.785711	DEPDC5_4	DEPDC5	0.0117776
FP009286	19	246.553	48.542	5.0792	0.0001116	***	0.785624	RSPH10B_1	RSPH10B	0.0117776
FP017436	17	369.043	69.6485	5.2987	0.0001124	***	0.816864	MTA1_3	MTA1	0.0118112
FP011351	16	359.849	66.153	5.4397	0.0001132	***	0.833525	TPD52L3_1	TPD52L3	0.0118444
FP021170	19	1117.42	220.707	5.0629	0.0001153	***	0.784661	PRTN3_1	PRTN3	0.0120044
FP002544	24	230.501	48.8251	4.721	0.0001161	***	0.717545	RGS7_2	RGS7	0.0120044
FP015742	21	124.676	25.4612	4.8967	0.0001162	***	0.755778	TRHDE_1	TRHDE	0.0120044
FP015824	21	-24824	5073.99	-4.8924	0.0001173	***	-0.755493	PLXNC1_2	PLXNC1	0.0120194
FP023025	17	-4416.18	837.264	-5.2745	0.0001175	***	-0.815622	CSRP2BP_2	CSRP2BP	0.0120194
FP005768	16	5135.32	948.86	5.4121	0.0001187	***	0.832229	TMEM129_2	TMEM129	0.0120194
FP024582	17	1241.27	235.588	5.2688	0.0001187	***	0.815326	MAGEB2_1	MAGEB2	0.0120194
FP000183	21	866.431	177.315	4.8864	0.0001188	***	0.755095	DFFA_2	DFFA	0.0120194
FP020832	14	265.334	47.6081	5.5733	0.0001212	***	0.849311	CEP192_1	CEP192	0.0122019
FP011212	12	82.9382	12.9075	6.4256	0.0001216	***	0.906108	TOP1MT_1	TOP1MT	0.0122019
FP021737	17	299.93	57.1713	5.2462	0.0001237	***	0.814144	ANO8_1	ANO8	0.0123619
FP018128	15	1462.88	263.585	5.5499	0.0001258	***	0.803432	PEX11A_1	PEX11A	0.012419
FP007328	15	6548.61	1180.09	5.5492	0.0001259	***	0.913682	SEPT8_1	42986	0.012419
FP007179	16	279.005	51.8904	5.3768	0.0001261	***	0.83055	FAM174A_1	FAM174A	0.012419
FP007966	21	338.357	69.6474	4.8581	0.0001263	***	0.753209	ERVFRD-1_1	ERVFRD-1	0.012419
FP001084	20	18876	3835.92	4.9209	0.0001294	***	0.766503	USP33_2	USP33	0.0126224
FP018506	15	310.543	57.9221	5.3614	0.0001294	***	0.829809	C16orf45_2	C16orf45	0.0126224
FP007492	17	253.538	48.6529	5.2112	0.0001319	***	0.812301	PCDHGB2_1	PCDHGB2	0.012724
FP008775	16	329.09	61.5131	5.3499	0.000132	***	0.829254	COQ3_1	COQ3	0.012724
FP006057	14	118.584	20.692	5.7309	0.000132	***	0.86551	NMU_1	NMU	0.012724
FP000925	12	136.923	21.5567	6.3518	0.0001326	***	0.904219	LRP8_2	LRP8	0.0127317
FP007478	20	1077.04	219.585	4.9049	0.0001338	***	0.765474	PCDHB8_1	PCDHB8	0.0127755
FP021222	16	320.907	60.0872	5.3407	0.0001341	***	0.828807	TCF3_2	TCF3	0.0127755
FP006985	17	225.203	43.3272	5.1977	0.0001351	***	0.811587	TRIM23_1	TRIM23	0.0128209
FP002917	20	419.485	85.7509	4.8919	0.0001375	***	0.764633	DYNC2LI1_1	DYNC2LI1	0.0129983
FP007312	14	109.806	20.0018	5.4898	0.0001385	***	0.845707	P4HA2_1	P4HA2	0.0130206
FP012582	14	165.183	28.9951	5.6969	0.0001388	***	0.864214	FXYD4_1	FXYD4	0.0130206
FP001418	20	263.959	54.0705	4.8818	0.0001404	***	0.763974	ADAM30_1	ADAM30	0.0131204
FP006026	23	6820.51	1457.81	4.6786	0.0001444	***	0.722878	FRYL_2	FRYL	0.0132991
FP000719	22	553.088	116.842	4.7336	0.0001445	***	0.735624	ZNF684_1	ZNF684	0.0132991
FP022176	23	132.572	28.3454	4.677	0.0001449	***	0.662335	TMEM91_2	TMEM91	0.0132991
FP005374	17	231.274	44.8451	5.1572	0.0001456	***	0.80941	PLSCR1_1	PLSCR1	0.0132991
FP005503	17	131.876	25.5771	5.156	0.0001459	***	0.809347	PHC3_1	PHC3	0.0132991
FP006986	17	237.678	46.1019	5.1555	0.000146	***	0.809318	CTC-534A2.2_1	CTC-534A2.2	0.0132991
FP021819	16	742.471	140.369	5.2894	0.0001465	***	0.826291	RFXANK_1	RFXANK	0.0132991
FP017904	14	1210.54	213.961	5.6578	0.0001471	***	0.862698	UACA_1	UACA	0.0132991
FP000974	19	194.313	39.3208	4.9417	0.0001472	***	0.77728	HOOK1_2	HOOK1	0.0132991
FP022060	22	530.766	112.371	4.7233	0.0001479	***	0.812427	PSMD8_1	PSMD8	0.0133132
FP024810	20	1407.66	289.971	4.8545	0.0001487	***	0.762188	UBQLN2_1	UBQLN2	0.0133362
FP025100	21	-2238.27	468.188	-4.7807	0.0001496	***	-0.747943	PLS3_2	PLS3	0.0133679
FP003554	20	359.692	74.1637	4.85	0.0001502	***	0.761891	NMI_1	NMI	0.0133727
FP011556	16	395.577	75.0324	5.2721	0.000151	***	0.825429	SLC25A51_1	SLC25A51	0.0133911
FP011498	15	2831.54	521.065	5.4342	0.0001515	***	0.84324	C9orf131_1	C9orf131	0.0133911
FP024648	21	228.041	47.794	4.7713	0.0001527	***	0.825782	P17_1	P17	0.0134137
FP006016	21	316.68	66.3858	4.7703	0.000153	***	0.747224	CNGA1_2	CNGA1	0.0134137
FP018916	21	-1301.01	272.796	-4.7692	0.0001534	***	-0.827724	CDH5_1	CDH5	0.0134137
FP009862	17	748.46	146.057	5.1244	0.0001546	***	0.807627	TRIM4_1	TRIM4	0.0134315
FP010165	17	13043.8	2602.51	5.012	0.0001547	***	0.791279	EXOC4_4	EXOC4	0.0134315
FP001236	17	3739.12	730.191	5.1207	0.0001556	***	0.807423	AMY2A_1	AMY2A	0.0134619
FP010422	20	296.31	61.3384	4.8307	0.0001564	***	0.760619	DEFA6_1	DEFA6	0.0134834
FP012585	19	176.787	36.0538	4.9034	0.0001591	***	0.774877	HNRNPF_3	HNRNPF	0.0136107
FP014617	19	540.144	110.182	4.9023	0.0001595	***	0.774806	ALG9_1	ALG9	0.0136107
FP019799	16	1915.88	365.655	5.2396	0.0001597	***	0.823798	SLFN12_1	SLFN12	0.0136107
FP001168	15	68.1828	12.6269	5.3998	0.0001601	***	0.84169	RPAP2_1	RPAP2	0.0136107
FP019694	20	4907.78	1019.4	4.8144	0.0001619	***	0.840844	SLC13A2_1	SLC13A2	0.0136161
FP006813	16	75.7216	14.4787	5.2299	0.0001624	***	0.823305	GOLPH3_1	GOLPH3	0.0136161
FP020516	19	335.868	68.6404	4.8932	0.0001624	***	0.774228	SLC16A5_3	SLC16A5	0.0136161
FP017459	16	257.52	49.2655	5.2272	0.0001632	***	0.894139	SNURF_1	SNURF	0.0136161
FP014583	14	135.313	24.2195	5.5869	0.0001635	***	0.859897	ACAT1_1	ACAT1	0.0136161
FP017656	16	1752.15	335.262	5.2262	0.0001635	***	0.82312	SPG11_2	SPG11	0.0136161
FP008756	16	151.204	29.0051	5.213	0.0001673	***	0.822449	LYRM2_1	LYRM2	0.013877
FP011147	21	176.063	37.2458	4.7271	0.0001682	***	0.744211	FAM49B_2	FAM49B	0.013877
FP005483	16	2197.97	421.941	5.2092	0.0001684	***	0.822252	BCHE_1	BCHE	0.013877
FP006844	22	1497.46	321.026	4.6646	0.0001689	***	0.747598	LMBRD2_1	LMBRD2	0.013877
FP023377	17	1586.89	312.899	5.0716	0.0001704	***	0.804699	UBE2V1_2	UBE2V1	0.0139151
FP001249	20	367.25	76.6731	4.7898	0.0001705	***	0.757883	NBPF6_1	NBPF6	0.0139151
FP007990	12	275.749	47.4869	5.8068	0.0001714	***	0.878219	DTNBP1_1	DTNBP1	0.0139421
FP015804	21	3587.67	760.871	4.7152	0.0001726	***	0.743377	DCN_3	DCN	0.0139712
FP016683	16	1239.53	238.65	5.1939	0.0001729	***	0.821469	ANG_2	ANG	0.0139712
FP004075	20	128.378	26.8511	4.7811	0.0001736	***	0.838837	KCNE4_1	KCNE4	0.0139817
FP020191	16	264.667	51.0533	5.1841	0.0001759	***	0.820965	SNX11_1	SNX11	0.0141204
FP021024	27	8890.62	2006.54	4.4308	0.0001766	***	0.763667	TCF4_6	TCF4	0.0141303
FP025416	15	7157.85	1343.1	5.3293	0.0001795	***	0.838442	DNASE1L1_1	DNASE1L1	0.0143156
FP013100	22	206.851	44.648	4.6329	0.0001814	***	0.728318	NOLC1_2	NOLC1	0.0144201
FP002705	9	7745.12	1080.65	7.1671	0.0001826	***	0.934055	WDR35_2	WDR35	0.0144685
FP022762	15	146.991	27.6687	5.3125	0.0001845	***	0.837654	NLRP5_1	NLRP5	0.0145251
FP004356	20	1849.41	389.147	4.7525	0.0001845	***	0.755351	RPL32_2	RPL32	0.0145251
FP022127	22	367.153	79.4686	4.6201	0.0001868	***	0.796509	AKT2_2	AKT2	0.0146513
FP017896	16	291.099	56.5448	5.1481	0.0001873	***	0.819093	PAQR5_2	PAQR5	0.0146513
FP018763	15	185.617	35.1489	5.2809	0.0001943	***	0.874806	ZNF843_1	ZNF843	0.0150701
FP006509	21	194.119	41.649	4.6608	0.0001944	***	0.799831	IL15_1	IL15	0.0150701
FP023506	16	189.545	36.9735	5.1265	0.0001945	***	0.817957	C20orf195_1	C20orf195	0.0150701
FP006851	20	2789.79	590.386	4.7254	0.0001954	***	0.753492	SLC1A3_2	SLC1A3	0.015092
FP003909	21	735.413	158.266	4.6467	0.0002006	***	0.738485	CARF_1	CARF	0.0154131
FP011818	17	283.496	56.9057	4.9819	0.0002012	***	0.799595	BAAT_1	BAAT	0.0154131
FP003715	19	580.873	121.472	4.7819	0.0002037	***	0.767032	ATP5G3_1	ATP5G3	0.0154131
FP022153	17	304.346	61.1731	4.9752	0.0002037	***	0.799207	MIA_1	MIA	0.0154131
FP009272	16	96.7441	18.9701	5.0998	0.0002038	***	0.816539	PAPOLB_1	PAPOLB	0.0154131
FP008135	13	263.39	46.4705	5.6679	0.0002073	***	0.873277	ZNF311_1	ZNF311	0.0154131
FP023735	17	300.407	60.5016	4.9653	0.0002075	***	0.798632	ABCG1_2	ABCG1	0.0154131
FP016636	17	-5724.09	1153.42	-4.9627	0.0002085	***	-0.798481	CUL4A_3	CUL4A	0.0154131
FP000266	17	3293.66	663.685	4.9627	0.0002085	***	0.798481	ZBTB17_1	ZBTB17	0.0154131
FP017446	17	3174.49	639.672	4.9627	0.0002085	***	0.798481	TUBGCP5_1	TUBGCP5	0.0154131
FP023953	17	7097.23	1430.12	4.9627	0.0002085	***	0.798481	ADORA2A_4	ADORA2A	0.0154131
FP012536	17	30784.7	6203.23	4.9627	0.0002085	***	0.798481	ARHGAP12_2	ARHGAP12	0.0154131
FP003086	17	3708.97	747.372	4.9627	0.0002085	***	0.798481	ADD2_3	ADD2	0.0154131
FP018134	17	265.485	53.5036	4.962	0.0002087	***	0.798441	AP3S2_1	AP3S2	0.0154131
FP001856	17	205.015	41.322	4.9614	0.000209	***	0.798405	ATP1A4_1	ATP1A4	0.0154131
FP001033	17	2073.71	418.248	4.9581	0.0002103	***	0.798212	C1orf141_1	C1orf141	0.0154624
FP015692	20	765.323	163.306	4.6864	0.0002122	***	0.75079	LLPH_1	LLPH	0.0155236
FP008128	16	4034.38	794.735	5.0764	0.0002124	***	0.815284	ZSCAN31_2	ZSCAN31	0.0155236
FP008971	19	327.096	68.7571	4.7573	0.0002142	***	0.766994	RPS12_1	RPS12	0.015584
FP013964	12	-4931.5	873.916	-5.643	0.0002145	***	-0.872361	GLYATL2_1	GLYATL2	0.015584
FP002769	16	813.392	160.565	5.0658	0.0002164	***	0.814712	CENPA_1	CENPA	0.0156756
FP001627	17	-20946.3	4239.68	-4.9405	0.0002172	***	-0.797184	S100A12_1	S100A12	0.0156871
FP018618	23	178.381	39.633	4.5008	0.0002184	***	0.757229	KIAA0556_1	KIAA0556	0.0157274
FP001217	15	142.133	27.2957	5.2071	0.0002193	***	0.832591	HIAT1_1	HIAT1	0.0157459
FP014114	22	111.395	24.5071	4.5454	0.0002212	***	0.721761	GPR137_2	GPR137	0.0158359
FP016411	12	173.43	29.3315	5.9128	0.0002255	***	0.891781	SLC25A30_1	SLC25A30	0.0160854
FP019534	20	229.849	49.3583	4.6567	0.000226	***	0.748703	GAS7_6	GAS7	0.0160854
FP012568	14	108.283	20.1653	5.3698	0.0002269	***	0.850799	ZNF248_2	ZNF248	0.0161027
FP021742	16	277.949	55.1929	5.0359	0.000228	***	0.781933	MVB12A_1	MVB12A	0.016134
FP024234	17	279.055	56.8286	4.9105	0.0002298	***	0.795405	CHADL_1	CHADL	0.0162145
FP018572	21	1559.14	340.262	4.5822	0.0002311	***	0.733771	IGSF6_1	IGSF6	0.0162593
FP024641	20	3175.12	683.732	4.6438	0.0002323	***	0.747788	KRBOX4_1	KRBOX4	0.0162714
FP000627	26	440.387	101.131	4.3546	0.0002326	***	0.753053	KIAA0319L_1	KIAA0319L	0.0162714
FP010120	15	393.383	76.1314	5.1672	0.0002342	***	0.769975	CCDC136_2	CCDC136	0.0162857
FP019453	20	242.163	52.1924	4.6398	0.0002343	***	0.747503	C17orf74_1	C17orf74	0.0162857
FP010313	21	1286.42	281.184	4.575	0.0002348	***	0.73324	REPIN1_3	REPIN1	0.0162857
FP002708	17	799.85	163.442	4.8938	0.000237	***	0.79441	LAPTM4A_1	LAPTM4A	0.0163918
FP002001	16	-3200.32	638.714	-5.0106	0.0002385	***	-0.811693	PRRC2C_2	PRRC2C	0.016405
FP007203	21	-594.802	130.228	-4.5674	0.0002388	***	-0.732675	TSLP_3	TSLP	0.016405
FP011991	17	8393.09	1716.76	4.8889	0.0002392	***	0.794118	RC3H2_2	RC3H2	0.016405
FP022660	15	211.632	41.1056	5.1485	0.0002416	***	0.894294	TFPT_1	TFPT	0.0164977
FP009008	17	302.352	61.9212	4.8829	0.0002419	***	0.793753	IFNGR1_2	IFNGR1	0.0164977
FP015264	19	-177.873	37.8971	-4.6936	0.000244	***	-0.761101	PUS7L_1	PUS7L	0.0165894
FP021571	15	1480.71	288.021	5.141	0.0002446	***	0.829302	ZNF433_1	ZNF433	0.0165894
FP000941	20	287.562	62.2722	4.6178	0.0002456	***	0.745934	FAM151A_1	FAM151A	0.0166112
FP024051	21	5458.35	1199.51	4.5505	0.0002478	***	0.731413	SMTN_6	SMTN	0.016668
FP015542	22	627.486	139.585	4.4954	0.0002478	***	0.823066	WIBG_2	WIBG	0.016668
FP021473	15	-837.169	163.322	-5.1259	0.0002508	***	-0.82854	ZNF561_1	ZNF561	0.0167918
FP022253	17	349.719	73.4446	4.7617	0.0002522	***	0.775785	LYPD5_1	LYPD5	0.0167918
FP013001	16	373.137	74.9479	4.9786	0.0002523	***	0.809916	PIK3AP1_2	PIK3AP1	0.0167918
FP015291	16	276.998	55.6767	4.9751	0.0002539	***	0.80972	RAPGEF3_5	RAPGEF3	0.0167918
FP023363	16	-2419.55	486.454	-4.9739	0.0002545	***	-0.809649	CSE1L_1	CSE1L	0.0167918
FP017077	17	126.815	26.1165	4.8557	0.0002545	***	0.792114	RAD51B_1	RAD51B	0.0167918
FP017330	16	566.29	113.853	4.9739	0.0002545	***	0.809649	GSKIP_1	GSKIP	0.0167918
FP014360	14	104.739	20.4779	5.1147	0.0002555	***	0.827974	P2RY6_1	P2RY6	0.0167918
FP003054	16	50888	10239.6	4.9697	0.0002563	***	0.809416	C1D_2	C1D	0.0167918
FP013674	19	794.149	170.077	4.6693	0.0002565	***	0.759441	RPS13_1	RPS13	0.0167918
FP009282	13	276.731	50.2163	5.5108	0.0002579	***	0.867343	FSCN1_1	FSCN1	0.0168141
FP001163	12	1757.83	319.051	5.5096	0.0002583	***	0.867295	BRDT_2	BRDT	0.0168141
FP016065	19	9939.42	2130.78	4.6647	0.0002589	***	0.759121	CCDC64_2	CCDC64	0.0168141
FP022260	19	231.873	49.7377	4.6619	0.0002604	***	0.758929	ZNF155_1	ZNF155	0.0168352
FP015155	17	-1295.64	267.526	-4.843	0.0002606	***	-0.79134	GOLT1B_1	GOLT1B	0.0168352
FP006058	18	166.223	35.0411	4.7437	0.0002613	***	0.774612	EXOC1_1	EXOC1	0.016836
FP025341	16	118.283	24.4441	4.8389	0.0002626	***	0.791089	GABRE_1	GABRE	0.0168753
FP014701	20	311.15	67.8632	4.585	0.0002634	***	0.743565	TTC36_1	TTC36	0.0168767
FP017979	18	813.165	171.616	4.7383	0.000264	***	0.774262	COMMD4_1	COMMD4	0.0168767
FP011834	14	305.715	58.026	5.2686	0.0002649	***	0.84628	NIPSNAP3B_1	NIPSNAP3B	0.0168781
FP014136	19	175.523	37.7249	4.6527	0.0002654	***	0.758292	EHD1_2	EHD1	0.0168781
FP018545	12	204.053	35.3126	5.7785	0.0002666	***	0.887519	GPRC5B_1	GPRC5B	0.0169105
FP009845	13	212.68	40.4148	5.2624	0.0002674	***	0.845998	PTCD1_1	PTCD1	0.0169174
FP020228	16	260.278	52.6467	4.9438	0.0002683	***	0.807957	SPOP_2	SPOP	0.0169306
FP009372	16	1079.81	218.77	4.9358	0.0002722	***	0.8075	TOMM7_1	TOMM7	0.0171325
FP009630	16	60.2694	12.228	4.9288	0.0002756	***	0.8071	SBDS_1	SBDS	0.0172953
FP018071	18	2579.89	547.118	4.7154	0.0002762	***	0.772758	CPEB1_3	CPEB1	0.0172953
FP024135	21	203.303	45.239	4.494	0.0002807	***	0.727147	SSTR3_1	SSTR3	0.0175027
FP007168	19	187.931	40.6428	4.624	0.0002815	***	0.756291	CAST_5	CAST	0.0175027
FP013792	13	177.901	34.0492	5.2248	0.0002834	***	0.844266	FBXO3_2	FBXO3	0.0175027
FP024983	23	1471.61	335.289	4.3891	0.0002834	***	0.700448	ARMCX1_1	ARMCX1	0.0175027
FP022173	18	217.262	46.2078	4.7019	0.0002837	***	0.771861	CCDC97_1	CCDC97	0.0175027
FP009045	16	-770.001	156.75	-4.9123	0.0002838	***	-0.806155	SF3B5_1	SF3B5	0.0175027
FP018456	14	190.096	36.4248	5.2189	0.000286	***	0.843989	CARHSP1_1	CARHSP1	0.0175601
FP008867	20	321.765	70.7951	4.545	0.0002868	***	0.740648	NT5DC1_2	NT5DC1	0.0175601
FP016658	16	3405.52	694.179	4.9058	0.0002871	***	0.805783	UPF3A_3	UPF3A	0.0175601
FP019405	16	676.088	137.84	4.9049	0.0002876	***	0.805729	AIPL1_1	AIPL1	0.0175601
FP015977	19	-867.054	188.106	-4.6094	0.0002901	***	-0.755267	C12orf76_1	C12orf76	0.0176687
FP022565	14	1137.98	218.64	5.2048	0.0002923	***	0.81168	KLK14_1	KLK14	0.0177267
FP019221	16	267.469	54.6377	4.8953	0.0002925	***	0.805176	SLC22A31_1	SLC22A31	0.0177267
FP012516	21	157.525	35.2517	4.4686	0.0002969	***	0.671814	MPP7_1	MPP7	0.0179489
FP022750	21	1841.64	412.242	4.4674	0.0002977	***	0.72511	CCDC106_1	CCDC106	0.0179529
FP019331	12	81.7882	15.1284	5.4063	0.0002988	***	0.86318	SHPK_1	SHPK	0.017975
FP021933	13	194.073	35.9227	5.4025	0.0003003	***	0.863027	ZNF30_1	ZNF30	0.0180209
FP022406	16	263.806	54.0772	4.8783	0.0003015	***	0.80419	PLA2G4C_1	PLA2G4C	0.0180487
FP015370	15	249.844	49.8469	5.0122	0.000303	***	0.822646	FAM186A_1	FAM186A	0.0180943
FP004978	15	239.462	47.816	5.008	0.0003052	***	0.822421	CPOX_1	CPOX	0.0181619
FP024606	16	1298.7	266.689	4.8697	0.0003062	***	0.785887	PRRG1_1	PRRG1	0.0181619
FP014770	14	2804.44	560.248	5.0057	0.0003064	***	0.8223	OR8D4_1	OR8D4	0.0181619
FP009912	19	304.414	66.4413	4.5817	0.0003071	***	0.753309	GIGYF1_1	GIGYF1	0.0181619
FP008391	13	312.464	58.0492	5.3828	0.0003089	***	0.862218	CLPSL2_1	CLPSL2	0.0182244
FP001006	16	3541.86	745.801	4.7491	0.000311	***	0.785494	RAVER2_2	RAVER2	0.0183041
FP014390	20	311.889	69.2206	4.5057	0.0003119	***	0.737736	XRRA1_1	XRRA1	0.0183131
FP004881	15	1298	260.084	4.9907	0.0003142	***	0.821499	SYNPR_1	SYNPR	0.0183747
FP021319	18	249.532	53.6662	4.6497	0.0003145	***	0.768366	EBI3_1	EBI3	0.0183747
FP021236	14	89.3696	17.3324	5.1562	0.0003152	***	0.841037	MOB3A_1	MOB3A	0.0183747
FP002991	17	16696.4	3524.48	4.7373	0.000318	***	0.784745	CCDC88A_2	CCDC88A	0.0184939
FP013621	21	166.365	37.5037	4.436	0.0003191	***	0.722679	MTRNR2L8_1	MTRNR2L8	0.0185138
FP020525	20	118.87	26.4614	4.4922	0.0003211	***	0.736724	GGA3_2	GGA3	0.0185281
FP017639	21	242.243	54.6654	4.4314	0.0003223	***	0.812093	CKMT1B_2	CKMT1B	0.0185281
FP004561	12	1822.74	324.013	5.6255	0.0003235	***	0.882371	ACKR2_1	ACKR2	0.0185281
FP004677	17	268.167	56.7237	4.7276	0.0003239	***	0.784129	P4HTM_1	P4HTM	0.0185281
FP019988	20	121.955	27.1747	4.4878	0.0003241	***	0.736395	KRT19_1	KRT19	0.0185281
FP007830	16	193.946	40.0915	4.8376	0.0003243	***	0.801798	ZNF354B_1	ZNF354B	0.0185281
FP007222	20	317.581	70.7883	4.4864	0.0003251	***	0.736286	TSSK1B_1	TSSK1B	0.0185281
FP004458	15	200.68	40.3807	4.9697	0.0003254	***	0.82037	CMTM7_1	CMTM7	0.0185281
FP014817	23	218.222	50.4742	4.3234	0.0003303	***	0.426494	ST3GAL4_4	ST3GAL4	0.0187597
FP000086	14	-3353.81	654.443	-5.1247	0.000331	***	-0.839521	ACTRT2_1	ACTRT2	0.0187597
FP013452	19	-379.75	83.6022	-4.5423	0.0003331	***	-0.75049	SYT8_1	SYT8	0.0188352
FP001968	20	6338.19	1417.26	4.4721	0.0003351	***	0.735215	TBX19_1	TBX19	0.0188988
FP021090	19	337.598	75.5468	4.4687	0.0003376	***	0.734958	SERPINB8_1	SERPINB8	0.0188988
FP023014	15	4865.3	1010.59	4.8143	0.000338	***	0.847444	DSTN_2	DSTN	0.0188988
FP011132	15	197.725	39.9795	4.9457	0.0003388	***	0.819066	NDUFB9_1	NDUFB9	0.0188988
FP001069	18	15137.1	3282.33	4.6117	0.000339	***	0.765773	SLC44A5_2	SLC44A5	0.0188988
FP008184	14	333.467	65.2731	5.1088	0.0003394	***	0.838751	DDR1_2	DDR1	0.0188988
FP004291	17	-556.605	118.392	-4.7014	0.0003403	***	-0.782444	RAD18_1	RAD18	0.0188988
FP017430	7	164.076	18.9595	8.654	0.0003404	***	0.968202	BRF1_2	BRF1	0.0188988
FP004342	15	456.491	92.4387	4.9383	0.0003431	***	0.818665	TAMM41_1	TAMM41	0.0190056
FP017879	19	103.196	22.822	4.5218	0.0003475	***	0.748999	MAP2K5_1	MAP2K5	0.0192058
FP005146	20	204.958	46.0928	4.4466	0.000354	***	0.733279	DTX3L_1	DTX3L	0.019521
FP023922	15	373.457	75.9994	4.9139	0.0003574	***	0.817326	LL22NC03-63E9.3_1	LL22NC03-63E9.3	0.0196582
FP022002	26	268.179	64.1352	4.1815	0.0003582	***	0.785166	ZNF565_1	ZNF565	0.0196582
FP018223	18	154.281	33.6685	4.5824	0.0003593	***	0.763747	MRPL28_1	MRPL28	0.0196582
FP023837	6	1874.57	167.12	11.2169	0.0003597	***	0.984473	SLC25A18_1	SLC25A18	0.0196582
FP009323	16	216.034	45.2221	4.7772	0.0003613	***	0.798179	SCIN_2	SCIN	0.0197017
FP020539	14	256.164	50.5599	5.0666	0.0003625	***	0.836677	LLGL2_1	LLGL2	0.0197232
FP008725	14	102.374	20.8971	4.899	0.0003666	***	0.816496	NT5E_1	NT5E	0.0198635
FP012355	15	91.8305	18.7457	4.8988	0.0003667	***	0.816484	PITRM1_1	PITRM1	0.0198635
FP002038	16	-397.312	83.426	-4.7625	0.000371	***	-0.797284	KIAA0040_1	KIAA0040	0.020052
FP014776	15	85.3973	17.9361	4.7612	0.0003719	***	0.797206	SPA17_1	SPA17	0.0200564
FP015579	19	2958.38	659.197	4.4878	0.0003728	***	0.746517	PAN2_3	PAN2	0.0200607
FP022696	14	1518.48	300.918	5.0462	0.0003743	***	0.835661	KIR2DL4_3	KIR2DL4	0.0200973
FP022503	16	9808.92	2062.38	4.7561	0.0003753	***	0.796897	CPT1C_2	CPT1C	0.0201057
FP011451	20	659.608	149.287	4.4184	0.0003761	***	0.731115	DNAJA1_2	DNAJA1	0.0201057
FP005007	16	254.082	53.4956	4.7496	0.0003797	***	0.702665	RPL24_1	RPL24	0.020254
FP002095	21	498.691	114.637	4.3502	0.0003857	***	0.715901	LAMC2_1	LAMC2	0.0205199
FP004762	17	-3641.6	785.87	-4.6338	0.0003868	***	-0.778029	IQCF1_1	IQCF1	0.0205199
FP017551	21	234.257	53.8707	4.3485	0.0003872	***	0.797473	C15orf52_1	C15orf52	0.0205199
FP022675	14	6569.41	1308.71	5.0197	0.0003902	***	0.834335	LILRB5_1	LILRB5	0.0206342
FP009962	18	96.1121	21.1735	4.5393	0.0003915	***	0.76073	NAPEPLD_1	NAPEPLD	0.0206584
FP023640	19	154.733	34.7032	4.4588	0.0003959	***	0.744364	DONSON_3	DONSON	0.0207024
FP021435	17	549.664	118.999	4.6191	0.0003978	***	0.777047	TIMM44_1	TIMM44	0.0207024
FP007902	19	258.801	58.0835	4.4557	0.0003985	***	0.673102	SERPINB9_2	SERPINB9	0.0207024
FP012405	16	235.359	49.861	4.7203	0.0004003	***	0.79469	DHTKD1_1	DHTKD1	0.0207024
FP006951	17	21231	4600.53	4.6149	0.0004009	***	0.731937	ACTBL2_1	ACTBL2	0.0207024
FP021211	16	70.6142	14.9634	4.7191	0.0004011	***	0.794617	C19orf25_1	C19orf25	0.0207024
FP019859	12	679.529	130.681	5.1999	0.0004014	***	0.854409	SOCS7_1	SOCS7	0.0207024
FP007827	19	236.219	53.0668	4.4514	0.0004021	***	0.743811	COL23A1_1	COL23A1	0.0207024
FP013316	16	149.402	31.673	4.717	0.0004027	***	0.794486	DHX32_1	DHX32	0.0207024
FP000810	21	368.101	85.0031	4.3304	0.000403	***	0.714312	TCTEX1D4_1	TCTEX1D4	0.0207024
FP013860	18	230.56	50.9784	4.5227	0.0004046	***	0.800579	C11orf94_1	C11orf94	0.0207024
FP009717	15	145.726	30.113	4.8393	0.0004055	***	0.81314	GNAI1_2	GNAI1	0.0207024
FP015965	19	264.417	59.4601	4.447	0.0004057	***	0.743483	MVK_1	MVK	0.0207024
FP006375	16	-7010.73	1487.63	-4.7127	0.0004058	***	-0.794218	HADH_1	HADH	0.0207024
FP020716	8	144.377	20.473	7.0521	0.0004068	***	0.944638	CCDC57_1	CCDC57	0.0207024
FP015253	21	10101.1	2334.99	4.326	0.000407	***	0.713951	CNTN1_3	CNTN1	0.0207024
FP022641	12	234.172	45.1195	5.19	0.0004071	***	0.85397	ZNF331_3	ZNF331	0.0207024
FP001873	21	2400.12	554.988	4.3246	0.0004082	***	0.713842	ITLN1_1	ITLN1	0.0207024
FP000177	22	153.87	35.9873	4.2757	0.0004084	***	0.700258	KIF1B_2	KIF1B	0.0207024
FP020600	16	1206.1	256.344	4.705	0.0004115	***	0.793739	SEPT9_10	42987	0.0208165
FP009725	13	81.5059	16.3587	4.9824	0.0004138	***	0.901745	SEMA3C_2	SEMA3C	0.0208896
FP009597	13	2556.34	513.396	4.9793	0.0004159	***	0.90153	VOPP1_3	VOPP1	0.0209236
FP022659	19	661.209	149.155	4.433	0.0004176	***	0.742438	PRPF31_1	PRPF31	0.0209236
FP020346	17	5567.21	1212.09	4.5931	0.000418	***	0.775304	USP32_2	USP32	0.0209236
FP019169	6	148.064	13.7259	10.7872	0.0004188	***	0.983243	ZDHHC7_1	ZDHHC7	0.0209236
FP016199	8	69.2806	9.8773	7.0141	0.0004189	***	0.944087	PUS1_1	PUS1	0.0209236
FP022256	12	14093.7	2726.46	5.1692	0.0004196	***	0.85304	ZNF404_1	ZNF404	0.0209236
FP019236	15	1982.26	411.754	4.8142	0.0004232	***	0.811704	VPS9D1_2	VPS9D1	0.0210602
FP000746	20	620.378	142.236	4.3616	0.0004248	***	0.726698	PPIH_1	PPIH	0.021097
FP001602	20	308.211	70.7327	4.3574	0.0004287	***	0.655167	KPRP_1	KPRP	0.0212476
FP010637	16	2011.6	429.83	4.68	0.0004305	***	0.792171	EXTL3_1	EXTL3	0.0212937
FP023010	13	334.418	65.053	5.1407	0.0004373	***	0.85175	BFSP1_3	BFSP1	0.0215864
FP017332	20	187.09	43.0385	4.347	0.0004383	***	0.725548	PAPOLA_1	PAPOLA	0.0215922
FP008226	20	263.883	60.7196	4.3459	0.0004394	***	0.606908	LTB_1	LTB	0.021603
FP025336	14	162.66	32.919	4.9412	0.0004417	***	0.830302	MAGEA4_1	MAGEA4	0.0216108
FP007409	11	115.388	21.4392	5.3821	0.0004433	***	0.873473	CTNNA1_1	CTNNA1	0.0216108
FP015850	17	4454.32	976.35	4.5622	0.0004433	***	0.773214	NEDD1_3	NEDD1	0.0216108
FP014253	11	8071.72	1500.23	5.3803	0.0004443	***	0.873402	KDM2A_3	KDM2A	0.0216108
FP013075	19	93.0499	21.149	4.3997	0.0004475	***	0.814166	LZTS2_3	LZTS2	0.0216108
FP018876	22	178.268	42.0949	4.2349	0.0004482	***	0.696832	COQ9_1	COQ9	0.0216108
FP002445	16	229.469	49.2662	4.6577	0.0004482	***	0.79076	ZNF678_1	ZNF678	0.0216108
FP011540	16	61.0554	13.1102	4.6571	0.0004487	***	0.790719	MELK_1	MELK	0.0216108
FP018331	13	182.809	37.0808	4.93	0.0004497	***	0.829717	MLST8_1	MLST8	0.0216108
FP005375	21	142.151	33.2145	4.2798	0.0004509	***	0.710181	ZIC4_2	ZIC4	0.0216108
FP009598	18	289.942	64.8882	4.4683	0.0004509	***	0.755654	VOPP1_2	VOPP1	0.0216108
FP009577	20	234.904	54.2138	4.3329	0.0004518	***	0.724429	ZPBP_1	ZPBP	0.0216108
FP000082	12	133.359	26.0565	5.1181	0.000452	***	0.850715	FAM213B_1	FAM213B	0.0216108
FP008109	18	1722.22	385.59	4.4664	0.0004526	***	0.755517	HIST1H3I_1	HIST1H3I	0.0216108
FP010397	13	2652.97	518.478	5.1168	0.0004528	***	0.850659	ESYT2_4	ESYT2	0.0216108
FP008845	16	112.179	24.1196	4.651	0.0004537	***	0.839686	GTF3C6_1	GTF3C6	0.0216117
FP008159	20	172.847	39.9311	4.3286	0.000456	***	0.724088	RPP21_1	RPP21	0.021679
FP012412	17	253.889	55.8826	4.5433	0.0004596	***	0.771918	MCM10_1	MCM10	0.0218078
FP003263	15	3207.21	673.601	4.7613	0.0004631	***	0.808628	STARD7_2	STARD7	0.0218105
FP013070	22	9653.57	2287.42	4.2203	0.0004634	***	0.76315	FAM178A_2	FAM178A	0.0218105
FP007110	11	92.9337	16.3553	5.6822	0.0004638	***	0.874499	DHFR_1	DHFR	0.0218105
FP012912	22	103.818	24.6074	4.219	0.0004648	***	0.69548	PTEN_1	PTEN	0.0218105
FP003003	17	200.964	45.1299	4.453	0.0004649	***	0.754538	FANCL_1	FANCL	0.0218105
FP011570	16	239.145	51.568	4.6375	0.000465	***	0.789464	CNTNAP3B_1	CNTNAP3B	0.0218105
FP010554	27	220.838	54.547	4.0486	0.000466	***	0.777672	POLR3D_2	POLR3D	0.0218156
FP006196	21	580.613	136.187	4.2633	0.0004676	***	0.708826	ANXA3_1	ANXA3	0.0218487
FP009303	19	282.822	64.6198	4.3767	0.0004694	***	0.73816	RSPH10B2_1	RSPH10B2	0.021891
FP003123	15	232.141	48.8724	4.7499	0.0004722	***	0.807959	TPRKB_1	TPRKB	0.0219797
FP013280	11	655.744	122.974	5.3324	0.0004732	***	0.871538	HTRA1_1	HTRA1	0.0219845
FP019394	15	241.332	50.8383	4.747	0.0004745	***	0.807788	C1QBP_1	C1QBP	0.0220031
FP014938	16	264.117	57.1231	4.6236	0.0004768	***	0.788577	VAMP1_1	VAMP1	0.022068
FP024161	20	196.815	45.6999	4.3067	0.0004781	***	0.722334	C22orf23_1	C22orf23	0.0220864
FP002871	15	163.814	35.4537	4.6205	0.0004795	***	0.788375	AC007390.5_1	AC007390.5	0.0221094
FP015184	20	370.447	86.0865	4.3032	0.0004817	***	0.5703	SSPN_1	SSPN	0.022155
FP006368	21	336.113	79.0968	4.2494	0.0004823	***	0.707669	TBCK_1	TBCK	0.022155
FP020958	15	138.476	29.2639	4.732	0.0004869	***	0.806894	PSTPIP2_1	PSTPIP2	0.0223245
FP005227	9	73.5966	12.0521	6.1065	0.0004879	***	0.917578	RAB43_2	RAB43	0.0223285
FP014181	17	2563.29	568.453	4.5092	0.0004904	***	0.769567	PCNXL3_2	PCNXL3	0.022401
FP011943	23	88.4148	21.3016	4.1506	0.0004947	***	0.806523	TNC_1	TNC	0.0225544
FP007846	15	629.369	133.295	4.7216	0.0004956	***	0.806278	CANX_1	CANX	0.0225544
FP006831	14	247.52	50.8691	4.8658	0.000498	***	0.826305	BRIX1_1	BRIX1	0.0226072
FP006208	17	-248.859	55.302	-4.5	0.0004992	***	-0.768922	PRKG2_3	PRKG2	0.0226072
FP009935	16	639.026	138.987	4.5977	0.0004997	***	0.491452	CLDN15_2	CLDN15	0.0226072
FP006889	21	151.299	35.7478	4.2324	0.0005009	***	0.706252	GHR_1	GHR	0.0226072
FP024969	14	8921.4	1892.28	4.7146	0.0005016	***	0.805859	CENPI_2	CENPI	0.0226072
FP002251	16	317.974	69.2014	4.5949	0.0005023	***	0.786712	RBBP5_2	RBBP5	0.0226072
FP011380	17	-64483.5	14347.2	-4.4945	0.0005045	***	-0.768538	CCDC171_4	CCDC171	0.022623
FP020395	18	-3023.27	685.213	-4.4122	0.0005045	***	-0.751534	CSH2_1	CSH2	0.022623
FP019798	11	547.872	103.847	5.2757	0.00051	***	0.869285	SLFN12_2	SLFN12	0.0228279
FP005806	15	113.928	24.2213	4.7036	0.0005111	***	0.805199	GRK4_1	GRK4	0.0228354
FP001165	19	-346.52	79.9456	-4.3344	0.0005125	***	-0.73489	BTBD8_1	BTBD8	0.0228562
FP007626	16	181.441	39.6277	4.5786	0.0005174	***	0.785647	GM2A_1	GM2A	0.0230328
FP009051	14	276.273	58.8627	4.6935	0.0005201	***	0.804588	EPM2A_1	EPM2A	0.0231109
FP019264	13	-291.633	58.1582	-5.0145	0.000526	***	-0.845852	VPS53_1	VPS53	0.0233107
FP019891	21	560.986	133.255	4.2099	0.0005265	***	0.704361	PGAP3_1	PGAP3	0.0233107
FP017413	19	70.594	16.3495	4.3178	0.0005306	***	0.73359	SIVA1_1	SIVA1	0.0233944
FP019659	15	727.454	155.419	4.6806	0.0005317	***	0.803804	AKAP10_1	AKAP10	0.0233944
FP008917	21	30767.3	7316.51	4.2052	0.000532	***	0.703966	TPD52L1_3	TPD52L1	0.0233944
FP012805	15	3996.33	854.012	4.6795	0.0005327	***	0.803737	DNAJC9_1	DNAJC9	0.0233944
FP013313	18	301.645	68.8067	4.3839	0.0005338	***	0.749431	BCCIP_1	BCCIP	0.0233944
FP000013	12	143.744	27.4392	5.2386	0.0005357	***	0.86778	TTLL10_1	TTLL10	0.0233944
FP022346	15	1907.92	408.054	4.6757	0.0005363	***	0.803504	IGFL2_1	IGFL2	0.0233944
FP014193	15	-353.279	75.5795	-4.6743	0.0005375	***	-0.80342	SNX32_1	SNX32	0.0233944
FP010574	16	117.729	25.8358	4.5568	0.0005384	***	0.784208	TNFRSF10B_1	TNFRSF10B	0.0233944
FP021137	8	88.7492	13.2545	6.6958	0.0005384	***	0.939132	PQLC1_1	PQLC1	0.0233944
FP014160	16	100.921	22.6275	4.4601	0.0005389	***	0.766112	CAPN1_3	CAPN1	0.0233944
FP005205	15	297.664	65.3659	4.5538	0.0005414	***	0.784008	MGLL_3	MGLL	0.0234613
FP012393	19	170.043	39.5085	4.3039	0.0005461	***	0.732499	ATP5C1_1	ATP5C1	0.0236232
FP009217	11	350.324	67.083	5.2223	0.0005476	***	0.867107	PRKAR1B_4	PRKAR1B	0.023632
FP002337	20	14501.9	3418	4.2428	0.0005486	***	0.71715	PPP2R5A_2	PPP2R5A	0.023632
FP005145	20	136.244	32.1159	4.2423	0.0005492	***	0.717105	PARP9_2	PARP9	0.023632
FP008207	11	338.545	61.161	5.5353	0.0005504	***	0.890482	HCG27_1	HCG27	0.0236421
FP005002	26	2094.75	522.697	4.0076	0.000552	***	0.761517	IMPG2_1	IMPG2	0.0236693
FP013755	20	18426.4	4349.29	4.2366	0.0005559	***	0.716644	FSHB_2	FSHB	0.0237949
FP000277	18	5023.29	1152.91	4.357	0.0005634	***	0.747405	SZRD1_1	SZRD1	0.0240738
FP024882	13	225.428	47.1092	4.7852	0.0005666	***	0.821889	ACRC_1	ACRC	0.0241684
FP014214	15	116.83	25.1811	4.6396	0.0005706	***	0.80129	KLC2_2	KLC2	0.0242966
FP018566	20	324.722	76.9184	4.2216	0.0005742	***	0.715407	ZP2_1	ZP2	0.0244075
FP004030	21	131.854	31.6385	4.1675	0.0005785	***	0.736627	CDK5R2_1	CDK5R2	0.0245475
FP016012	15	2346.17	519.463	4.5165	0.0005795	***	0.781517	NAA25_1	NAA25	0.0245475
FP011460	18	132.085	30.4196	4.3421	0.0005806	***	0.746269	AQP3_1	AQP3	0.0245517
FP010072	16	-3239.18	718.24	-4.5099	0.0005866	***	-0.781069	CPED1_4	CPED1	0.0247626
FP019260	15	210.643	45.6023	4.6191	0.0005911	***	0.828569	RPH3AL_1	RPH3AL	0.0249096
FP014919	17	6215.72	1436.3	4.3276	0.0005977	***	0.745161	NDUFA9_1	NDUFA9	0.0250846
FP019955	17	5451.19	1237.2	4.4061	0.0005978	***	0.762238	KRTAP1-4_1	KRTAP1-4	0.0250846
FP005299	18	112.104	25.9137	4.3261	0.0005996	***	0.745045	SLC35G2_1	SLC35G2	0.0250846
FP019874	23	86.469	21.2565	4.0679	0.0006003	***	0.672881	LASP1_1	LASP1	0.0250846
FP006276	20	141.347	33.6486	4.2007	0.0006007	***	0.713666	HERC3_1	HERC3	0.0250846
FP022788	14	1563.54	339.228	4.6091	0.0006014	***	0.596833	ZNF304_1	ZNF304	0.0250846
FP018643	20	1202.96	286.579	4.1977	0.0006047	***	0.347543	ATP2A1_2	ATP2A1	0.0251794
FP010077	23	2778.22	683.963	4.062	0.0006086	***	0.672344	AASS_2	AASS	0.0252987
FP024733	18	366.76	84.9661	4.3166	0.0006111	***	0.744315	GAGE12H_1	GAGE12H	0.0253596
FP002134	19	420.934	99.1124	4.247	0.000615	***	0.727961	UCHL5_1	UCHL5	0.0254783
FP020635	12	153.27	29.8904	5.1277	0.0006215	***	0.863132	ENGASE_1	ENGASE	0.0257041
FP004352	16	343.731	76.8078	4.4752	0.000625	***	0.77871	RAF1_1	RAF1	0.0257308
FP013691	11	65.6706	12.8185	5.1231	0.0006253	***	0.740784	RP11-113D6.10_1	RP11-113D6.10	0.0257308
FP006609	9	200.049	30.7387	6.508	0.0006271	***	0.935904	NAF1_1	NAF1	0.0257308
FP006447	16	295.443	66.0446	4.4734	0.0006271	***	0.778586	KIAA1109_1	KIAA1109	0.0257308
FP007980	12	96.987	18.9404	5.1206	0.0006274	***	0.862827	MCUR1_1	MCUR1	0.0257308
FP018195	11	66.0583	12.2011	5.4141	0.0006352	***	0.906187	LRRK1_1	LRRK1	0.0260071
FP022377	6	357.402	36.936	9.6761	0.0006383	***	0.9793	TMEM160_1	TMEM160	0.0260836
FP019674	16	1516.61	339.82	4.463	0.0006392	***	0.77787	KCNJ12_2	KCNJ12	0.0260836
FP003784	19	649.109	153.649	4.2246	0.0006445	***	0.726147	ZSWIM2_1	ZSWIM2	0.0262451
FP009686	14	130.78	28.6274	4.5684	0.0006453	***	0.796822	POR_2	POR	0.0262451
FP010571	11	2930.41	542.842	5.3983	0.0006473	***	0.885781	RHOBTB2_1	RHOBTB2	0.0262827
FP024170	19	63.642	15.0864	4.2185	0.0006527	***	0.725651	MAFF_2	MAFF	0.0264346
FP019118	18	360.939	84.2642	4.2834	0.0006532	***	0.741751	TMEM231_1	TMEM231	0.0264346
FP010785	17	325.283	74.6683	4.3564	0.0006579	***	0.7586	TMEM68_2	TMEM68	0.0265532
FP016911	13	263.722	54.2283	4.8632	0.0006583	***	0.838349	DNAAF2_1	DNAAF2	0.0265532
FP025121	16	7529.13	1694.46	4.4434	0.0006626	***	0.776516	CXorf56_1	CXorf56	0.0266827
FP019371	18	244.054	57.102	4.274	0.0006657	***	0.741019	GP1BA_1	GP1BA	0.0267277
FP003816	21	1790.57	436.272	4.1043	0.0006659	***	0.695288	STAT4_1	STAT4	0.0267277
FP009164	14	113.393	24.2248	4.6808	0.0006706	***	0.81594	SLC22A3_1	SLC22A3	0.0268006
FP005329	16	2200.74	496.039	4.4366	0.0006709	***	0.776046	PRR23B_1	PRR23B	0.0268006
FP010423	14	2037.35	448.182	4.5458	0.000671	***	0.795379	DEFA4_1	DEFA4	0.0268006
FP000832	17	178.769	41.1665	4.3426	0.0006756	***	0.757578	IPP_1	IPP	0.0268927
FP013908	18	13224.4	3147.34	4.2018	0.000676	***	0.772616	CELF1_2	CELF1	0.0268927
FP015997	17	241.277	55.5709	4.3418	0.0006766	***	0.757519	FAM109A_1	FAM109A	0.0268927
FP016883	19	224.636	53.4957	4.1991	0.0006797	***	0.724068	SEC23A_1	SEC23A	0.0269721
FP017625	19	1268.05	302.361	4.1938	0.0006873	***	0.723633	LCMT2_1	LCMT2	0.0272242
FP006626	11	5298.09	1048.87	5.0513	0.0006892	***	0.859794	SPOCK3_1	SPOCK3	0.0272242
FP017174	25	204.717	51.8967	3.9447	0.0006901	***	0.749344	FOS_2	FOS	0.0272242
FP016003	15	1594.99	352.147	4.5293	0.0006905	***	0.794316	BRAP_3	BRAP	0.0272242
FP015822	20	2300.76	556.495	4.1344	0.0006932	***	0.708072	CRADD_1	CRADD	0.0272507
FP014260	9	652.164	113.283	5.7569	0.0006934	***	0.908637	CLCF1_2	CLCF1	0.0272507
FP014453	20	378.814	91.6737	4.1322	0.0006965	***	0.747405	PCF11_1	PCF11	0.0272889
FP018238	17	122.119	28.2245	4.3267	0.0006966	***	0.756395	WFIKKN1_1	WFIKKN1	0.0272889
FP015109	20	314.572	76.1782	4.1294	0.0007007	***	0.707648	H2AFJ_1	H2AFJ	0.0274057
FP024388	15	1600.14	354.029	4.5198	0.0007021	***	0.861591	CPT1B_2	CPT1B	0.0274119
FP004420	17	740.622	171.363	4.322	0.0007031	***	0.756039	UBE2E1_2	UBE2E1	0.0274119
FP001800	20	337.601	81.8183	4.1262	0.0007055	***	0.707375	SH2D2A_1	SH2D2A	0.0274618
FP017287	18	188.612	44.4427	4.2439	0.0007073	***	0.738652	BTBD7_1	BTBD7	0.0274881
FP002782	19	83.2329	19.9177	4.1788	0.0007092	***	0.722396	PREB_1	PREB	0.0275183
FP007253	11	4774.07	950.725	5.0215	0.0007176	***	0.858465	PRR16_2	PRR16	0.0278002
FP007805	18	1051.9	248.334	4.2358	0.000719	***	0.738008	F12_1	F12	0.0278104
FP018561	19	176.071	42.2134	4.171	0.000721	***	0.721745	ERI2_1	ERI2	0.0278438
FP011929	13	277.731	59.9506	4.6327	0.0007252	***	0.813105	AKNA_4	AKNA	0.0279394
FP024048	17	226.418	52.59	4.3053	0.0007261	***	0.839404	SMTN_3	SMTN	0.0279394
FP012884	21	349.068	85.8746	4.0649	0.0007269	***	0.691817	RGR_1	RGR	0.0279394
FP005931	16	211.6	48.1782	4.392	0.0007283	***	0.772915	SLC34A2_1	SLC34A2	0.0279494
FP023897	20	2951.1	718.091	4.1096	0.0007313	***	0.70595	AIFM3_2	AIFM3	0.0279883
FP015030	14	206.852	44.7025	4.6273	0.0007316	***	0.812785	M6PR_1	M6PR	0.0279883
FP021536	11	306.051	57.7995	5.295	0.0007328	***	0.882048	KANK2_2	KANK2	0.0279904
FP017728	16	3337.86	760.922	4.3866	0.0007356	***	0.77253	GNB5_3	GNB5	0.0280536
FP003186	14	101.885	22.0429	4.6221	0.0007378	***	0.812474	TCF7L1_1	TCF7L1	0.0280938
FP013639	15	302.173	67.3128	4.4891	0.0007406	***	0.68897	MICAL2_1	MICAL2	0.0281566
FP014225	12	311.041	62.2706	4.995	0.000744	***	0.857266	SLC29A2_1	SLC29A2	0.0281715
FP024732	18	356.07	84.4053	4.2186	0.0007445	***	0.736636	GAGE12F_1	GAGE12F	0.0281715
FP011985	18	236.843	56.1605	4.2173	0.0007464	***	0.73653	PTGS1_3	PTGS1	0.0281715
FP025125	28	216.114	56.2864	3.8395	0.0007473	***	0.634627	SEPT6_3	42984	0.0281715
FP008294	21	256.648	63.3439	4.0517	0.0007486	***	0.602987	PBX2_1	PBX2	0.0281715
FP005682	14	141.201	30.6126	4.6125	0.0007495	***	0.811901	XXYLT1_1	XXYLT1	0.0281715
FP016861	16	124.98	28.5621	4.3757	0.0007505	***	0.771756	FAM177A1_1	FAM177A1	0.0281715
FP025431	15	-5012.98	1118.95	-4.4801	0.0007523	***	-0.791094	IKBKG_4	IKBKG	0.0281715
FP001904	15	-970.005	216.533	-4.4797	0.0007528	***	-0.791071	FCGR3A_1	FCGR3A	0.0281715
FP003248	14	242.349	52.5749	4.6096	0.000753	***	0.811726	TEKT4_1	TEKT4	0.0281715
FP023939	16	113.994	26.0701	4.3726	0.0007548	***	0.771534	GSTT2B_1	GSTT2B	0.0281715
FP023943	16	113.994	26.0701	4.3726	0.0007548	***	0.771534	GSTT2_1	GSTT2	0.0281715
FP017523	20	779.331	192.756	4.0431	0.000763	***	0.689879	MEIS2_4	MEIS2	0.0284311
FP014005	23	181.606	45.8058	3.9647	0.0007641	***	0.793577	DDB1_1	DDB1	0.0284311
FP019853	18	140.558	33.9316	4.1424	0.0007655	***	0.719362	TBC1D3F_3	TBC1D3F	0.0284311
FP015377	15	268.295	60.0291	4.4694	0.0007664	***	0.790389	METTL7A_1	METTL7A	0.0284311
FP009555	21	1179.99	292.13	4.0393	0.0007695	***	0.689535	MYO1G_1	MYO1G	0.0284368
FP002679	20	3116.89	762.864	4.0858	0.00077	***	0.703885	LPIN1_4	LPIN1	0.0284368
FP003482	18	103.579	25.0227	4.1394	0.0007702	***	0.577284	MZT2B_1	MZT2B	0.0284368
FP013702	15	-1454.31	325.651	-4.4658	0.0007712	***	-0.790152	UEVLD_2	UEVLD	0.0284368
FP013924	11	312.842	62.9841	4.967	0.0007731	***	0.855984	FOLH1_1	FOLH1	0.0284374
FP016348	12	12163.7	2557.81	4.7555	0.0007738	***	0.832701	SPG20_4	SPG20	0.0284374
FP011479	10	139.774	26.6285	5.249	0.0007747	***	0.880329	ENHO_1	ENHO	0.0284374
FP020121	16	100.203	23.002	4.3563	0.000778	***	0.659465	HIGD1B_2	HIGD1B	0.0285158
FP020491	15	7267.88	1629.81	4.4593	0.0007801	***	0.789719	CD300C_1	CD300C	0.0285293
FP012212	17	195.501	45.8081	4.2678	0.0007807	***	0.551759	SARDH_2	SARDH	0.0285293
FP025252	27	172.321	44.8443	3.8427	0.0007834	***	0.628192	FHL1_5	FHL1	0.0285853
FP006687	25	217.094	55.7896	3.8913	0.0007859	***	0.639695	ACSL1_4	ACSL1	0.0286339
FP016657	19	304.031	73.6517	4.128	0.0007889	***	0.71815	UPF3A_2	UPF3A	0.0287005
FP005437	14	376.153	84.5321	4.4498	0.0007931	***	0.789084	KCNAB1_2	KCNAB1	0.0288105
FP002105	13	1457.51	307.749	4.736	0.0007969	***	0.831652	COLGALT2_2	COLGALT2	0.0288781
FP006531	27	313.183	81.6578	3.8353	0.000798	***	0.653205	C4orf51_1	C4orf51	0.0288781
FP024200	14	-8701.22	1902.44	-4.5737	0.0007985	***	-0.809553	APOBEC3H_1	APOBEC3H	0.0288781
FP019048	14	97.5445	21.3396	4.571	0.000802	***	0.809391	EXOSC6_1	EXOSC6	0.0289619
FP016350	15	977.486	225.447	4.3358	0.000808	***	0.768883	SPG20_2	SPG20	0.0291356
FP020411	17	70.1746	16.521	4.2476	0.0008119	***	0.750384	DDX5_1	DDX5	0.0292332
FP002743	20	122.267	30.1224	4.059	0.000816	***	0.701547	POMC_1	POMC	0.0293377
FP025432	14	127.035	27.8827	4.556	0.0008219	***	0.808472	CTAG1A_1	CTAG1A	0.0294381
FP025433	14	127.035	27.8827	4.556	0.0008219	***	0.808472	CTAG1B_1	CTAG1B	0.0294381
FP025091	6	10094.6	1114.16	9.0603	0.0008224	***	0.976492	AMOT_4	AMOT	0.0294381
FP020397	17	-2503.71	590.498	-4.24	0.000824	***	-0.749796	CSH1_1	CSH1	0.0294523
FP004283	19	149.231	36.3505	4.1053	0.0008272	***	0.716236	EDEM1_1	EDEM1	0.0295016
FP009092	14	490.997	107.883	4.5512	0.0008285	***	0.808172	MTHFD1L_1	MTHFD1L	0.0295016
FP008782	20	-831.402	205.22	-4.0513	0.0008297	***	-0.387908	SIM1_1	SIM1	0.0295016
[truncated: 23,796 more rows]

## Sheet: Primates q<0.05
epdid	speciescount	estimate	stderr	t.value	p.value	stars	pearsoncorrelation	geneid	geneidnameonly	adjust
[truncated: 987 more rows]

[truncated: 2 more sheets: Primates negative corr, Primates positive corr]
