# Supplementary material for: The evolution of CpG density and lifespan in conserved primate and mammalian promoters
Source: Aging (Albany NY). 2018 Apr 14;10(4):561–72. doi: 10.18632/aging.101413 (PMC5940106; doi:10.18632/aging.101413)
Supplement: Supplementary Table S4 [file aging-10-101413-s004.xlsx]

## Sheet: mam + Cell
Index	Name	P-value	Adjusted p-value	Z-score	Combined score
1	subsarcolemmal mitochondrion (GO:1990843)	0.004503	0.4246	-4.41	23.8
2	mitochondrial derivative (GO:0016007)	0.004503	0.4246	-4.38	23.68
3	Nebenkern (GO:0016006)	0.004503	0.4246	-4.37	23.6
4	interfibrillar mitochondrion (GO:1990844)	0.004503	0.4246	-4.35	23.48
5	mitochondrion (GO:0005739)	0.004503	0.4246	-4.33	23.39
6	spindle pole centrosome (GO:0031616)	0.01682	0.7166	-3.41	13.92
7	centrosomal corona (GO:0031592)	0.01834	0.7166	-3.25	13
8	centrosome (GO:0005813)	0.02028	0.7166	-3.3	12.85
9	nuclear speck (GO:0016607)	0.02248	0.7166	-3.37	12.8
10	pericentriolar material (GO:0000242)	0.02133	0.7166	-3.26	12.55

## Sheet: mam + BP
Index	Name	P-value	Adjusted p-value	Z-score	Combined score
1	gap junction assembly (GO:0016264)	0.000324	0.862	-3.2	25.68
2	negative regulation of atrial cardiac muscle cell action potential (GO:1903948)	0.001539	0.862	-3.24	20.96
3	response to steroid hormone (GO:0048545)	0.001539	0.862	-3.23	20.91
4	ubiquinone-6 biosynthetic process (GO:1901006)	0.001539	0.862	-3.02	19.54
5	response to vitamin D (GO:0033280)	0.002218	0.862	-3	18.36
6	resolution of mitotic recombination intermediates (GO:0071140)	0.003078	0.862	-2.93	16.97
7	resolution of recombination intermediates (GO:0071139)	0.002088	0.862	-2.66	16.45
8	DNA topological change (GO:0006265)	0.002703	0.862	-2.74	16.22
9	mitotic spindle elongation (GO:0000022)	0.002743	0.862	-2.74	16.14
10	lamellipodium assembly (GO:0030032)	0.003205	0.862	-2.78	15.94

## Sheet: mam + MF
Index	Name	P-value	Adjusted p-value	Z-score	Combined score
1	protein homodimerization activity (GO:0042803)	0.0004704	0.5114	-3.38	25.93
2	mRNA binding (GO:0003729)	0.01263	0.5114	-3.75	16.41
3	rRNA binding (GO:0019843)	0.01531	0.5114	-3.46	14.47
4	translation factor activity, RNA binding (GO:0008135)	0.01673	0.5114	-3.46	14.13
5	GU repeat RNA binding (GO:1990605)	0.01888	0.5114	-3.24	12.87
6	mRNA 3'-UTR AU-rich region binding (GO:0035925)	0.003122	0.5114	-2.23	12.87
7	misfolded RNA binding (GO:0034336)	0.01888	0.5114	-3.23	12.84
8	21U-RNA binding (GO:0034583)	0.01888	0.5114	-3.23	12.81
9	regulatory region RNA binding (GO:0001069)	0.01888	0.5114	-3.22	12.79
10	histone pre-mRNA DCP binding (GO:0071208)	0.01921	0.5114	-3.23	12.78

## Sheet: mam - Cell
Index	Name	P-value	Adjusted p-value	Z-score	Combined score
1	microtubule cytoskeleton (GO:0015630)	0.03357	0.5561	-2.81	9.53
2	recycling endosome lumen (GO:0034777)	0.03023	0.5561	-2.24	7.83
3	cortical cytoskeleton (GO:0030863)	0.0504	0.5561	-2.35	7.02
4	septin cytoskeleton (GO:0032156)	0.04394	0.5561	-2.24	7.01
5	cytoskeleton (GO:0005856)	0.04394	0.5561	-2.23	6.96
6	spectrin-associated cytoskeleton (GO:0014731)	0.04894	0.5561	-2.29	6.91
7	perinuclear theca (GO:0033011)	0.1472	0.6959	-3.2	6.13
8	intermediate filament cytoskeleton (GO:0045111)	0.07753	0.5561	-2.21	5.65
9	cytoplasmic replication fork (GO:0043597)	0.04053	0.5561	-1.5	4.81
10	replication fork (GO:0005657)	0.04053	0.5561	-1.37	4.39

## Sheet: mam - BP
Index	Name	P-value	Adjusted p-value	Z-score	Combined score
1	DNA damage induced protein phosphorylation (GO:0006975)	0.04982	0.3311	-4.86	14.58
2	Cdc42 protein signal transduction (GO:0032488)	0.006829	0.3311	-2.81	14.01
3	phosphorylation of RNA polymerase II C-terminal domain (GO:0070816)	0.09884	0.3311	-5.2	12.03
4	transsulfuration (GO:0019346)	0.02624	0.3311	-3.19	11.6
5	negative regulation of neuron death (GO:1901215)	0.01866	0.3311	-2.91	11.57
6	homocysteine biosynthetic process (GO:0071268)	0.02047	0.3311	-2.86	11.11
7	Rho protein signal transduction (GO:0007266)	0.03144	0.3311	-3.11	10.75
8	macrophage chemotaxis (GO:0048246)	0.02912	0.3311	-2.97	10.51
9	homocysteine catabolic process (GO:0043418)	0.02912	0.3311	-2.96	10.47
10	regulation of transcription from RNA polymerase II promoter by calcium-mediated signaling (GO:1900621)	0.07792	0.3311	-4.09	10.44

## Sheet: mam - MF
Index	Name	P-value	Adjusted p-value	Z-score	Combined score
1	Rac GTPase binding (GO:0048365)	0.006829	0.2699	-1.98	9.89
2	ubiquitin protein ligase activity involved in chloroplast disassembly (GO:1904822)	0.06669	0.2699	-2.23	6.03
3	ubiquitin protein ligase activity involved in ERAD pathway (GO:1904264)	0.07246	0.2699	-2.28	5.98
4	ubiquitin-ubiquitin ligase activity (GO:0034450)	0.07079	0.2699	-2.25	5.95
5	protein kinase activity involved in regulation of protein localization to cell division site involved in cytokinesis (GO:1901916)	0.08889	0.2699	-2.39	5.78
6	[isocitrate dehydrogenase (NADP+)] kinase activity (GO:0008772)	0.08889	0.2699	-2.39	5.78
7	dephospho-[reductase kinase] kinase activity (GO:0047848)	0.08889	0.2699	-2.37	5.75
8	pyruvate dehydrogenase (acetyl-transferring) kinase activity (GO:0004740)	0.08889	0.2699	-2.37	5.73
9	caldesmon kinase activity (GO:0047764)	0.08889	0.2699	-2.36	5.72
10	protein arginine kinase activity (GO:1990424)	0.08889	0.2699	-2.36	5.7

## Sheet: pri + Cell
Index	Name	P-value	Adjusted p-value	Z-score	Combined score
1	nucleolar part (GO:0044452)	0.01035	0.6916	-3.78	17.28
2	nucleolus (GO:0005730)	0.01088	0.6916	-3.78	17.07
3	mitochondrion (GO:0005739)	0.0338	0.6916	-4.16	14.09
4	Nebenkern (GO:0016006)	0.0338	0.6916	-4.14	14.02
5	mitochondrial derivative (GO:0016007)	0.0338	0.6916	-4.12	13.95
6	interfibrillar mitochondrion (GO:1990844)	0.0338	0.6916	-4.1	13.89
7	subsarcolemmal mitochondrion (GO:1990843)	0.0338	0.6916	-4.08	13.83
8	centrosomal corona (GO:0031592)	0.0172	0.6916	-3.32	13.49
9	pericentriolar material (GO:0000242)	0.0199	0.6916	-3.3	12.91
10	spindle pole centrosome (GO:0031616)	0.02417	0.6916	-3.34	12.43

## Sheet: pri + BP
Index	Name	P-value	Adjusted p-value	Z-score	Combined score
1	response to steroid hormone (GO:0048545)	0.001096	0.4201	-3.18	21.66
2	positive regulation of response to interferon-gamma (GO:0060332)	0.001016	0.4201	-3.02	20.82
3	negative regulation of G-protein coupled receptor protein signaling pathway (GO:0045744)	0.0004438	0.4201	-2.7	20.82
4	regulation of endocannabinoid signaling pathway (GO:2000124)	0.0003245	0.4201	-2.48	19.89
5	regulation of mRNA endonucleolytic cleavage involved in unfolded protein response (GO:1904720)	0.001464	0.4201	-2.88	18.8
6	protein localization to ciliary transition zone (GO:1904491)	0.002207	0.4201	-3.05	18.66
7	protein localization to ciliary inversin compartment (GO:1904108)	0.002207	0.4201	-3.04	18.57
8	protein localization to non-motile cilium (GO:0097499)	0.002207	0.4201	-2.99	18.27
9	regulation of dopamine receptor signaling pathway (GO:0060159)	0.0004954	0.4201	-2.38	18.08
10	ciliary basal body-plasma membrane docking (GO:0097711)	0.007082	0.7991	-3.65	18.05

## Sheet: pri + MF
Index	Name	P-value	Adjusted p-value	Z-score	Combined score
1	actin binding (GO:0003779)	5.337e-05	0.1156	-2.46	24.16
2	actin monomer binding (GO:0003785)	0.0002396	0.2358	-2.52	21.01
3	mRNA binding (GO:0003729)	0.004227	0.2358	-3.83	20.95
4	rRNA binding (GO:0019843)	0.005476	0.2358	-3.77	19.62
5	translation factor activity, RNA binding (GO:0008135)	0.006036	0.2358	-3.8	19.41
6	ribonuclease P RNA binding (GO:0033204)	0.007055	0.2358	-3.55	17.59
7	regulatory region RNA binding (GO:0001069)	0.007055	0.2358	-3.54	17.55
8	21U-RNA binding (GO:0034583)	0.007055	0.2358	-3.53	17.5
9	base pairing with RNA (GO:0000498)	0.007055	0.2358	-3.53	17.47
10	alpha-aminoacyl-tRNA binding (GO:1904678)	0.007055	0.2358	-3.52	17.44

## Sheet: pri - Cell
Index	Name	P-value	Adjusted p-value	Z-score	Combined score
1	perinuclear theca (GO:0033011)	0.03923	0.4683	-3.47	11.23
2	trans-Golgi network membrane (GO:0032588)	0.0454	0.4683	-3.25	10.04
3	actomyosin, actin portion (GO:0042643)	0.01039	0.4683	-2.15	9.82
4	mitotic spindle microtubule (GO:1990498)	0.0189	0.4683	-2.19	8.67
5	recycling endosome lumen (GO:0034777)	0.02836	0.4683	-2.2	7.83
6	polar microtubule (GO:0005827)	0.02836	0.4683	-2.11	7.52
7	cytoskeleton (GO:0005856)	0.04128	0.4683	-2.15	6.85
8	cortical cytoskeleton (GO:0030863)	0.04738	0.4683	-2.24	6.82
9	septin cytoskeleton (GO:0032156)	0.04128	0.4683	-2.13	6.79
10	spectrin-associated cytoskeleton (GO:0014731)	0.046	0.4683	-2.18	6.71

[truncated: 2 more sheets: pri - BP, pri - MF]
